# Supplementary material for: Identification of copy number variation in French dairy and beef breeds using next-generation sequencing
Source: Genet Sel Evol. 2017 Oct 24;49:77. doi: 10.1186/s12711-017-0352-z (PMC5655909; doi:10.1186/s12711-017-0352-z)
Supplement: Supplementary file 1 — Additional file 1: Table S1. Number of variants predicted for each individual. This table provides details on each sequenced animal: sequencing coverage, statistics about reads number, its parents if they were sequenced and the total number of predicted variants. [file 12711_2017_352_MOESM1_ESM.xlsx]

## Sheet: Table S1
Additional File 1 Table S1 Number of variants predicted in each individual
Animal	Breed	Coverage	# sequences	Sire	Dam	# Validated events	Comment	Total reads	Mapped reads	Properly mapped reads
BAQ11	Blonde d'Aquitaine	10.53	1	N/A	N/A	1508	Boussaha et al. study [19]
BAQ14	Blonde d'Aquitaine	17.55	1	N/A	N/A	1908	Boussaha et al. study [19]
BAQ15	Blonde d'Aquitaine	14.06	1	N/A	N/A	1768	Boussaha et al. study [19]
BAQ16	Blonde d'Aquitaine	12.14	1	N/A	N/A	1766	Boussaha et al. study [19]
BAQ17	Blonde d'Aquitaine	15.56	1	N/A	N/A	1719	Boussaha et al. study [19]
BAQ18	Blonde d'Aquitaine	12.73	1	N/A	N/A	1604	Boussaha et al. study [19]
BAQ19	Blonde d'Aquitaine	14.16	1	N/A	N/A	1798	Boussaha et al. study [19]
BAQ22	Blonde d'Aquitaine	24.38	1	N/A	N/A	2026	Boussaha et al. study [19]
BAQ33	Blonde d'Aquitaine	17.69	1	N/A	N/A	1941	Boussaha et al. study [19]
BAQ110	Blonde d'Aquitaine	13.2	1	N/A	N/A	1839	Boussaha et al. study [19]
BAQ111	Blonde d'Aquitaine	16.97	1	N/A	N/A	1916	Boussaha et al. study [19]
BAQ112	Blonde d'Aquitaine	16.36	1	N/A	N/A	1909	Boussaha et al. study [19]
BAQ113	Blonde d'Aquitaine	12.00	1	N/A	N/A	1746	Boussaha et al. study [19]
BAQ114	Blonde d'Aquitaine	15.25	1	N/A	N/A	1737	Boussaha et al. study [19]
BAQ115	Blonde d'Aquitaine	13.97	1	N/A	N/A	1747	Boussaha et al. study [19]
BAQ116	Blonde d'Aquitaine	13.83	1	N/A	N/A	1707	Boussaha et al. study [19]
BAQ117	Blonde d'Aquitaine	25.76	1	N/A	N/A	1925	Boussaha et al. study [19]
BAQ118	Blonde d'Aquitaine	10.85	1	N/A	N/A	1490	Boussaha et al. study [19]
BAQ119	Blonde d'Aquitaine	13.38	1	N/A	N/A	1672	Boussaha et al. study [19]
BAQ120	Blonde d'Aquitaine	14.22	1	N/A	N/A	1817	Boussaha et al. study [19]
BAQ121	Blonde d'Aquitaine	14.33	1	N/A	N/A	1704	Boussaha et al. study [19]
BAQ122	Blonde d'Aquitaine	11.67	2	N/A	N/A	1711	Boussaha et al. study [19]
BAQ125	Blonde d'Aquitaine	14.73	1	N/A	N/A	1779	Boussaha et al. study [19]
BAQ126	Blonde d'Aquitaine	17.29	1	N/A	N/A	1969	Boussaha et al. study [19]
BAQ127	Blonde d'Aquitaine	12.24	1	N/A	N/A	439	This study	312,917,849	312,916,475	309,679,658
BSW1	Brown swiss	11.76	1	N/A	N/A	378	Boussaha et al. study [19]
BSW2	Brown swiss	10.49	1	N/A	N/A	450	Boussaha et al. study [19]
BSW3	Brown swiss	9.03	1	N/A	N/A	380	Boussaha et al. study [19]
CHA2	Charolaise	10.83	1	N/A	N/A	1428	Boussaha et al. study [19]
CHA3	Charolaise	12.17	2	N/A	N/A	1593	Boussaha et al. study [19]
CHA4	Charolaise	13.99	1	N/A	N/A	1786	Boussaha et al. study [19]
CHA5	Charolaise	16.47	1	N/A	N/A	1856	Boussaha et al. study [19]
CHA6	Charolaise	16.75	1	N/A	N/A	1918	Boussaha et al. study [19]
CHA8	Charolaise	15.72	1	N/A	N/A	1891	Boussaha et al. study [19]
CHA9	Charolaise	15.87	1	N/A	N/A	1813	Boussaha et al. study [19]
CHA13	Charolaise	10.95	1	N/A	N/A	1725	Boussaha et al. study [19]
CHA14	Charolaise	14.05	1	N/A	N/A	1795	Boussaha et al. study [19]
CHA15	Charolaise	15.46	1	N/A	N/A	1728	Boussaha et al. study [19]
CHA19	Charolaise	15.32	1	N/A	N/A	1813	Boussaha et al. study [19]
CHA20	Charolaise	13.88	1	N/A	N/A	1629	Boussaha et al. study [19]
CHA21	Charolaise	14.45	1	N/A	N/A	1775	Boussaha et al. study [19]
CHA22	Charolaise	15.9	1	N/A	N/A	1877	Boussaha et al. study [19]
CHA23	Charolaise	15.13	1	N/A	N/A	1809	Boussaha et al. study [19]
CHA24	Charolaise	12.32	2	N/A	N/A	1654	Boussaha et al. study [19]
CHA25	Charolaise	14.64	1	N/A	N/A	1852	Boussaha et al. study [19]
CHA26	Charolaise	13.58	1	N/A	N/A	1694	Boussaha et al. study [19]
CHA27	Charolaise	14.42	1	N/A	N/A	1708	Boussaha et al. study [19]
CHA29	Charolaise	14.86	1	N/A	N/A	1737	Boussaha et al. study [19]
CHA30	Charolaise	15.36	1	N/A	N/A	1789	Boussaha et al. study [19]
CHA31	Charolaise	25.21	1	N/A	N/A	1993	Boussaha et al. study [19]
CHA32	Charolaise	14.98	1	N/A	N/A	1868	Boussaha et al. study [19]
CHA33	Charolaise	13.77	1	N/A	N/A	1830	Boussaha et al. study [19]
CHA35	Charolaise	12.77	1	N/A	N/A	1736	This study	351,325,428	339,690,113	329,771,004
HOL5	Holstein	8.11	1	N/A	N/A	212	Boussaha et al. study [19]
HOL6	Holstein	12.21	1	N/A	N/A	532	Boussaha et al. study [19]
HOL7	Holstein	11.87	1	N/A	N/A	474	Boussaha et al. study [19]
HOL8	Holstein	12.02	1	N/A	N/A	619	Boussaha et al. study [19]
HOL9	Holstein	20.76	1	HOL34	N/A	1726	Boussaha et al. study [19]
HOL10	Holstein	9.96	1	N/A	N/A	652	Boussaha et al. study [19]
HOL11	Holstein	19.36	1	N/A	N/A	970	Boussaha et al. study [19]
HOL12	Holstein	11.06	1	N/A	N/A	698	Boussaha et al. study [19]
HOL13	Holstein	11.73	1	N/A	N/A	524	Boussaha et al. study [19]
HOL14	Holstein	13.02	1	N/A	N/A	560	Boussaha et al. study [19]
HOL16	Holstein	20.75	1	N/A	N/A	1279	Boussaha et al. study [19]
HOL17	Holstein	12.89	1	N/A	N/A	1180	Boussaha et al. study [19]
HOL18	Holstein	21.37	1	N/A	N/A	1327	Boussaha et al. study [19]
HOL19	Holstein	10.7	1	N/A	N/A	457	Boussaha et al. study [19]
HOL20	Holstein	11.4	1	N/A	N/A	527	Boussaha et al. study [19]
HOL23	Holstein	15.92	1	N/A	N/A	1112	Boussaha et al. study [19]
HOL24	Holstein	8.7	1	N/A	N/A	670	Boussaha et al. study [19]
HOL25	Holstein	11.1	1	N/A	N/A	522	Boussaha et al. study [19]
HOL26	Holstein	12.09	1	N/A	N/A	550	Boussaha et al. study [19]
HOL29	Holstein	12.00	1	N/A	N/A	476	Boussaha et al. study [19]
HOL30	Holstein	10.65	1	N/A	N/A	574	Boussaha et al. study [19]
HOL31	Holstein	11.94	1	N/A	N/A	584	Boussaha et al. study [19]
HOL32	Holstein	11.69	1	N/A	N/A	424	Boussaha et al. study [19]
HOL34	Holstein	10.32	1	N/A	N/A	1018	Boussaha et al. study [19]
HOL35	Holstein	12.38	1	HOL57	N/A	703	Boussaha et al. study [19]
HOL36	Holstein	21.27	1	N/A	N/A	1585	Boussaha et al. study [19]
HOL38	Holstein	14.34	1	N/A	N/A	206	Boussaha et al. study [19]
HOL39	Holstein	11.11	1	N/A	N/A	545	Boussaha et al. study [19]
HOL40	Holstein	11.05	1	N/A	N/A	674	Boussaha et al. study [19]
HOL41	Holstein	8.36	1	N/A	N/A	722	Boussaha et al. study [19]
HOL42	Holstein	10.72	1	N/A	N/A	673	Boussaha et al. study [19]
HOL43	Holstein	10.72	1	N/A	N/A	657	Boussaha et al. study [19]
HOL44	Holstein	11.00	1	N/A	N/A	657	Boussaha et al. study [19]
HOL45	Holstein	11.15	1	N/A	N/A	525	Boussaha et al. study [19]
HOL46	Holstein	12.34	1	N/A	N/A	567	Boussaha et al. study [19]
HOL47	Holstein	12.28	1	N/A	N/A	437	Boussaha et al. study [19]
HOL48	Holstein	12.64	1	N/A	N/A	543	Boussaha et al. study [19]
HOL49	Holstein	13.3	1	N/A	N/A	606	Boussaha et al. study [19]
HOL50	Holstein	11.73	1	N/A	N/A	363	Boussaha et al. study [19]
HOL52	Holstein	12.45	1	N/A	N/A	588	Boussaha et al. study [19]
HOL55	Holstein	8.93	1	N/A	N/A	943	Boussaha et al. study [19]
HOL57	Holstein	10.67	1	N/A	N/A	385	Boussaha et al. study [19]
HOL58	Holstein	12.55	1	N/A	N/A	599	Boussaha et al. study [19]
HOL59	Holstein	12.02	1	N/A	N/A	1061	Boussaha et al. study [19]
HOL60	Holstein	13.46	1	N/A	N/A	512	Boussaha et al. study [19]
HOL61	Holstein	12.78	1	N/A	N/A	469	Boussaha et al. study [19]
HOL62	Holstein	11.96	1	N/A	N/A	473	Boussaha et al. study [19]
HOL63	Holstein	11.42	1	N/A	N/A	637	Boussaha et al. study [19]
HOL64	Holstein	17.24	1	N/A	N/A	1344	Boussaha et al. study [19]
HOL65	Holstein	12.19	1	N/A	N/A	1527	Boussaha et al. study [19]
HOL66	Holstein	14.39	1	N/A	N/A	1653	Boussaha et al. study [19]
HOL67	Holstein	14.74	1	N/A	N/A	1598	Boussaha et al. study [19]
HOL68	Holstein	15.28	1	N/A	N/A	1349	Boussaha et al. study [19]
HOL69	Holstein	16.04	1	N/A	N/A	1786	Boussaha et al. study [19]
HOL70	Holstein	17.46	1	N/A	N/A	1819	Boussaha et al. study [19]
HOL71	Holstein	11.65	1	N/A	N/A	490	Boussaha et al. study [19]
LIM2	Limousine	13.73	1	N/A	N/A	1803	Boussaha et al. study [19]
LIM3	Limousine	12.48	1	N/A	N/A	1616	Boussaha et al. study [19]
LIM4	Limousine	15.87	1	N/A	N/A	1909	Boussaha et al. study [19]
LIM5	Limousine	12.97	2	N/A	N/A	1745	Boussaha et al. study [19]
LIM6	Limousine	14.67	1	N/A	N/A	1899	Boussaha et al. study [19]
LIM7	Limousine	15.51	1	N/A	N/A	1849	Boussaha et al. study [19]
LIM8	Limousine	13.22	1	N/A	N/A	1751	Boussaha et al. study [19]
LIM10	Limousine	11.97	2	N/A	N/A	1613	Boussaha et al. study [19]
LIM12	Limousine	17.36	1	N/A	N/A	1909	Boussaha et al. study [19]
LIM13	Limousine	13.55	1	N/A	N/A	1836	Boussaha et al. study [19]
LIM14	Limousine	13.73	1	N/A	N/A	1804	Boussaha et al. study [19]
LIM15	Limousine	17.25	1	N/A	N/A	1963	Boussaha et al. study [19]
LIM16	Limousine	12.14	2	N/A	N/A	1544	Boussaha et al. study [19]
LIM17	Limousine	25.23	1	N/A	N/A	2075	Boussaha et al. study [19]
LIM18	Limousine	13.73	1	N/A	N/A	1774	Boussaha et al. study [19]
LIM19	Limousine	17.81	1	N/A	N/A	1829	Boussaha et al. study [19]
LIM20	Limousine	13.58	1	N/A	N/A	1848	Boussaha et al. study [19]
LIM21	Limousine	8.39	1	N/A	N/A	159	This study	239,575,406	193,746,979	175,350,636
LIM22	Limousine	10.44	1	N/A	N/A	347	This study	296,474,050	251,482,460	235,888,669
LIM23	Limousine	10.53	1	N/A	N/A	324	This study	291,289,704	254,093,292	237,163,273
LIM24	Limousine	11.03	1	N/A	N/A	100	This study	326,481,672	266,708,918	222,472,134
LIM25	Limousine	13.9	1	N/A	N/A	997	This study	375,625,898	343,460,558	326,071,809
LIM26	Limousine	14.78	1	N/A	N/A	1064	This study	403,557,472	370,306,143	359,292,806
LIM27	Limousine	13.25	1	N/A	N/A	214	This study	389,609,830	329,555,282	315,911,096
LIM28	Limousine	13.8	1	N/A	N/A	437	This study	377,259,650	338,274,408	329,051,048
LIM29	Limousine	12.43	1	N/A	N/A	1055	This study	392,839,806	320,607,852	306,414,827
LIM30	Limousine	13.44	1	N/A	N/A	1064	This study	411,908,286	347,486,350	324,119,168
LIM31	Limousine	14.53	1	N/A	N/A	1107	This study	467,732,022	378,069,097	357,777,996
LIM32	Limousine	15.8	1	N/A	N/A	470	This study	438,295,832	405,367,423	384,318,416
LIM33	Limousine	9.34	3	N/A	N/A	76	This study	195,610,310	198,826,090	141,668,769
LIM34	Limousine	18.35	3	N/A	N/A	299	This study	405,398,068	470,400,064	342,000,245
LIM35	Limousine	8.06	1	N/A	N/A	85	This study	324,087,018	221,015,607	184,672,689
LIM36	Limousine	13.78	1	N/A	N/A	170	This study	258,474,904	357,153,841	225,422,603
LIM37	Limousine	21.17	1	N/A	N/A	46	This study	25,491,112	24,991,104	24,436,032
MON1	Montbéliarde	24.83	3	N/A	N/A	2540	Boussaha et al. study [19]
MON2	Montbéliarde	25.69	2	N/A	N/A	2665	Boussaha et al. study [19]
MON5	Montbéliarde	29.78	4	MON31	MON2	2957	Boussaha et al. study [19]
MON7	Montbéliarde	29.05	3	MON31	MON1	2835	Boussaha et al. study [19]
MON8	Montbéliarde	16.39	1	MON51	N/A	467	Boussaha et al. study [19]
MON9	Montbéliarde	10.61	1	MON51	N/A	670	Boussaha et al. study [19]
MON10	Montbéliarde	21.84	1	MON45	N/A	522	Boussaha et al. study [19]
MON16	Montbéliarde	11.95	1	N/A	N/A	573	Boussaha et al. study [19]
MON17	Montbéliarde	11.53	1	N/A	N/A	553	Boussaha et al. study [19]
MON18	Montbéliarde	13.09	1	N/A	N/A	557	Boussaha et al. study [19]
MON20	Montbéliarde	11.86	1	N/A	N/A	1821	Boussaha et al. study [19]
MON21	Montbéliarde	11.29	1	N/A	N/A	942	Boussaha et al. study [19]
MON22	Montbéliarde	13.74	1	MON8	N/A	1906	Boussaha et al. study [19]
MON23	Montbéliarde	11.67	1	N/A	N/A	757	Boussaha et al. study [19]
MON27	Montbéliarde	12.56	1	N/A	N/A	631	Boussaha et al. study [19]
MON29	Montbéliarde	9.98	1	N/A	N/A	421	Boussaha et al. study [19]
MON31	Montbéliarde	22.82	3	N/A	N/A	2577	Boussaha et al. study [19]
MON34	Montbéliarde	20.64	1	N/A	N/A	1723	Boussaha et al. study [19]
MON35	Montbéliarde	10.73	1	MON51	N/A	642	Boussaha et al. study [19]
MON36	Montbéliarde	12.57	1	N/A	N/A	180	Boussaha et al. study [19]
MON37	Montbéliarde	11.06	1	N/A	N/A	790	Boussaha et al. study [19]
MON38	Montbéliarde	8.75	1	MON36	N/A	685	Boussaha et al. study [19]
MON42	Montbéliarde	10.85	1	N/A	N/A	1535	Boussaha et al. study [19]
MON44	Montbéliarde	10.63	1	N/A	N/A	460	Boussaha et al. study [19]
MON45	Montbéliarde	9.96	1	N/A	N/A	569	Boussaha et al. study [19]
MON46	Montbéliarde	10.76	1	N/A	N/A	528	Boussaha et al. study [19]
MON48	Montbéliarde	10.06	1	MON35	N/A	549	Boussaha et al. study [19]
MON50	Montbéliarde	12.46	1	N/A	N/A	705	Boussaha et al. study [19]
MON51	Montbéliarde	11.81	1	N/A	N/A	395	Boussaha et al. study [19]
MON53	Montbéliarde	10.53	1	MON34	N/A	366	Boussaha et al. study [19]
MON55	Montbéliarde	11.79	1	N/A	N/A	781	Boussaha et al. study [19]
NOR3	Normande	13.16	1	NOR21	N/A	1836	Boussaha et al. study [19]
NOR5	Normande	11.14	1	N/A	N/A	494	Boussaha et al. study [19]
NOR6	Normande	11.55	1	N/A	N/A	410	Boussaha et al. study [19]
NOR7	Normande	9.7	1	NOR31	N/A	670	Boussaha et al. study [19]
NOR8	Normande	8.21	1	N/A	N/A	683	Boussaha et al. study [19]
NOR9	Normande	8.87	1	N/A	N/A	776	Boussaha et al. study [19]
NOR13	Normande	10.51	1	N/A	N/A	592	Boussaha et al. study [19]
NOR16	Normande	8.33	1	N/A	N/A	377	Boussaha et al. study [19]
NOR17	Normande	8.64	1	N/A	N/A	472	Boussaha et al. study [19]
NOR20	Normande	12.66	1	N/A	N/A	178	Boussaha et al. study [19]
NOR21	Normande	27.55	1	N/A	N/A	1336	Boussaha et al. study [19]
NOR22	Normande	17.59	1	N/A	N/A	282	Boussaha et al. study [19]
NOR23	Normande	32.74	1	NOR20	N/A	1513	Boussaha et al. study [19]
NOR24	Normande	11.2	1	N/A	N/A	613	Boussaha et al. study [19]
NOR25	Normande	9.38	1	NOR22	N/A	398	Boussaha et al. study [19]
NOR27	Normande	8.07	1	NOR3	N/A	403	Boussaha et al. study [19]
NOR28	Normande	10.56	1	N/A	N/A	968	Boussaha et al. study [19]
NOR31	Normande	9.74	1	N/A	N/A	452	Boussaha et al. study [19]
NOR32	Normande	8.05	1	N/A	N/A	392	Boussaha et al. study [19]
NOR34	Normande	11.18	1	N/A	N/A	675	Boussaha et al. study [19]
NOR36	Normande	8.00	1	NOR13	N/A	640	Boussaha et al. study [19]
NOR38	Normande	11.9	1	N/A	N/A	540	Boussaha et al. study [19]
NOR43	Normande	7.97	1	N/A	N/A	772	Boussaha et al. study [19]
RdP5	Rouge des Prés	31.02	2	N/A	N/A	2255	Boussaha et al. study [19]
RdP6	Rouge des Prés	16.12	1	N/A	N/A	1861	This study	441,777,492	429,965,532	417,862,487
RdP7	Rouge des Prés	16.77	1	N/A	N/A	1800	This study	461,585,458	447,110,301	433,091,143
N/A: information Not available
