# Supplementary material for: Identification of copy number variation in French dairy and beef breeds using next-generation sequencing
Source: Genet Sel Evol. 2017 Oct 24;49:77. doi: 10.1186/s12711-017-0352-z (PMC5655909; doi:10.1186/s12711-017-0352-z)
Supplement: Supplementary file 3 — Additional file 3: Table S2. Variants identified in the 200 whole-genome sequences. This file provides details on all predicted and merged variants before applying validation approaches (in silico and experimental). [file 12711_2017_352_MOESM3_ESM.xlsx]

## Sheet: Table S2
Additional File 3 Table S2 Variants identified in the 200 whole-genome sequences
CNVR_ID	BTA	CNVR_start	CNVR_end	CNVR_size	CNVR_type	# tools	# total animals	# BAQ animals	# BWS animals	# CHA animals	# HOL animals	# LIM animals	# MON animals	# NOR animals	# RdP animals
CNVR_1	1	21383	22042	660	DEL	2	4	2	0	1	0	0	0	1	0
CNVR_2	1	32072	33093	1022	DEL	2	118	21	0	24	26	21	16	7	3
CNVR_3	1	81938	82826	889	DEL	2	1	0	0	0	0	0	1	0	0
CNVR_4	1	518423	519284	862	DEL	2	23	7	0	7	4	1	2	1	1
CNVR_5	1	518550	519270	721	DEL	2	19	5	0	5	2	2	5	0	0
CNVR_6	1	858360	858954	595	DEL	2	4	1	0	0	1	1	0	1	0
CNVR_7	1	858528	858926	399	DEL	2	1	0	0	1	0	0	0	0	0
CNVR_8	1	936367	936882	516	DUP	2	1	0	0	0	0	1	0	0	0
CNVR_9	1	1174991	1175696	706	DEL	3	6	3	0	1	0	0	1	0	1
CNVR_10	1	1902150	1903757	1608	DEL	4	132	24	1	24	26	21	18	15	3
CNVR_11	1	2597302	2599689	2388	DEL	2	2	1	0	0	0	0	0	0	1
CNVR_12	1	2735556	2735822	267	DEL	2	1	0	0	0	0	1	0	0	0
CNVR_13	1	2979049	2980332	1284	DEL	3	9	1	0	1	2	0	4	1	0
CNVR_14	1	3015100	3015471	372	DEL	2	5	0	0	0	3	1	1	0	0
CNVR_15	1	3066743	3277533	210791	DEL	3	10	1	1	3	0	1	3	0	1
CNVR_16	1	3107582	3108454	873	DEL	2	2	0	0	0	0	1	0	0	1
CNVR_17	1	3139942	3141089	1148	DEL	4	10	2	0	4	0	4	0	0	0
CNVR_18	1	3273887	3275520	1634	DEL	3	12	1	0	6	0	0	2	2	1
CNVR_19	1	4128966	4174558	45593	DEL	2	14	4	0	4	3	3	0	0	0
CNVR_20	1	4141792	4143279	1488	DEL	3	11	4	0	1	0	5	1	0	0
CNVR_21	1	4179501	4181413	1913	DEL	4	33	7	0	7	0	8	9	2	0
CNVR_22	1	4196091	4253762	57672	DEL	2	16	4	0	4	0	4	2	0	2
CNVR_23	1	4204548	4248105	43558	DEL	3	9	3	0	1	2	1	2	0	0
CNVR_24	1	4362601	4371500	8900	DEL	3	6	0	0	0	0	6	0	0	0
CNVR_25	1	4453313	4455181	1869	DEL	2	1	0	0	0	0	0	1	0	0
CNVR_26	1	4543929	4554480	10552	DEL	2	18	0	0	0	5	3	6	4	0
CNVR_27	1	4543946	4566957	23012	CNV	3	32	0	0	0	9	6	11	6	0
CNVR_28	1	4547730	4558573	10844	DEL	3	34	0	1	0	16	6	6	5	0
CNVR_29	1	4552349	4562613	10265	DEL	3	10	0	0	0	3	2	3	2	0
CNVR_30	1	4589053	4589562	510	DEL	2	1	0	0	1	0	0	0	0	0
CNVR_31	1	4681748	4713032	31285	DEL	2	25	5	0	4	6	4	4	1	1
CNVR_32	1	4681772	4687500	5729	CNV	2	11	4	0	4	0	3	0	0	0
CNVR_33	1	4689853	4699558	9706	DEL	2	3	0	0	0	0	3	0	0	0
CNVR_34	1	5081065	5085500	4436	DEL	3	17	1	0	6	2	2	4	1	1
CNVR_35	1	5142191	5143232	1042	DEL	3	18	3	0	6	6	0	0	1	2
CNVR_36	1	5231821	5301319	69499	DEL	2	6	1	0	4	0	1	0	0	0
CNVR_37	1	5300751	5307250	6500	DEL	3	2	0	0	0	1	0	1	0	0
CNVR_38	1	5336560	5337063	504	DEL	2	1	0	0	1	0	0	0	0	0
CNVR_39	1	5340459	5341282	824	DEL	2	1	0	0	0	0	1	0	0	0
CNVR_40	1	5585995	5586728	734	DEL	2	1	1	0	0	0	0	0	0	0
CNVR_41	1	5586043	5586502	460	DEL	2	8	0	0	0	4	1	0	3	0
CNVR_42	1	5612104	5614939	2836	DEL	4	11	4	0	4	0	3	0	0	0
CNVR_43	1	5636513	5636819	307	DEL	2	1	0	0	0	0	0	0	1	0
CNVR_44	1	6099317	6104640	5324	DEL	2	1	0	0	0	1	0	0	0	0
CNVR_45	1	6140929	6141597	669	DEL	2	2	0	0	0	2	0	0	0	0
CNVR_46	1	6307201	6327300	20100	DEL	3	24	7	0	5	5	3	3	1	0
CNVR_47	1	6326886	6327118	233	DEL	2	4	0	0	0	4	0	0	0	0
CNVR_48	1	6350590	6351222	633	DEL	2	1	0	0	1	0	0	0	0	0
CNVR_49	1	6608857	6609818	962	DEL	2	62	13	0	16	8	16	5	2	2
CNVR_50	1	6609133	6609691	559	DEL	2	1	1	0	0	0	0	0	0	0
CNVR_51	1	6733745	6734918	1174	DEL	3	93	23	0	21	12	19	12	3	3
CNVR_52	1	6737130	6737496	367	DEL	2	1	0	0	0	1	0	0	0	0
CNVR_53	1	7051520	7054113	2594	DEL	2	6	2	0	1	1	0	2	0	0
CNVR_54	1	7145701	7149300	3600	DEL	3	10	1	0	2	3	0	2	2	0
CNVR_55	1	7194434	7195212	779	DEL	2	1	1	0	0	0	0	0	0	0
CNVR_56	1	7733521	7762997	29477	DEL	2	2	0	0	2	0	0	0	0	0
CNVR_57	1	8032773	8033031	259	DEL	2	4	0	0	0	4	0	0	0	0
CNVR_58	1	8130712	14361707	6230996	DEL	2	2	0	0	0	0	0	2	0	0
CNVR_59	1	8327937	8328507	571	DEL	2	11	0	0	2	5	3	0	0	1
CNVR_60	1	8404765	8406438	1674	DEL	2	4	1	0	1	0	0	1	0	1
CNVR_61	1	8504888	8506071	1184	DEL	3	2	0	0	0	2	0	0	0	0
CNVR_62	1	9235439	9235740	302	DEL	2	5	0	0	0	4	0	1	0	0
CNVR_63	1	9385994	9387125	1132	DEL	3	12	4	0	1	0	2	4	1	0
CNVR_64	1	9462950	9464476	1527	DEL	3	35	5	0	3	3	10	7	6	1
CNVR_65	1	9640354	9645595	5242	DUP	2	1	1	0	0	0	0	0	0	0
CNVR_66	1	10068504	10069074	571	DEL	2	3	1	0	0	0	1	1	0	0
CNVR_67	1	10531801	10560600	28800	DEL	3	2	0	0	0	0	2	0	0	0
CNVR_68	1	10546001	10549000	3000	DEL	4	3	0	0	0	1	0	2	0	0
CNVR_69	1	10702751	10704063	1313	DEL	3	8	0	0	2	0	3	2	0	1
CNVR_70	1	10731068	10924804	193737	DEL	2	2	2	0	0	0	0	0	0	0
CNVR_71	1	10842378	10843518	1141	DEL	3	132	24	0	23	30	23	17	12	3
CNVR_72	1	10880903	10881949	1047	DEL	2	1	0	0	0	0	1	0	0	0
CNVR_73	1	11045251	11051500	6250	DEL	3	1	0	0	0	0	0	0	1	0
CNVR_74	1	11100104	11100371	268	DEL	2	2	0	0	0	2	0	0	0	0
CNVR_75	1	11165078	11165754	677	DEL	2	2	1	0	1	0	0	0	0	0
CNVR_76	1	11165212	11165712	501	DEL	2	16	3	0	0	3	2	3	4	1
CNVR_77	1	11165325	11165883	559	DEL	2	1	0	0	0	0	0	1	0	0
CNVR_78	1	11214678	11217964	3287	DEL	3	35	11	0	12	5	2	3	0	2
CNVR_79	1	11684623	11688084	3462	DEL	2	2	0	0	0	0	2	0	0	0
CNVR_80	1	11705764	11707500	1737	DEL	3	14	5	0	4	0	4	0	0	1
CNVR_81	1	11768701	11769600	900	DEL	2	1	1	0	0	0	0	0	0	0
CNVR_82	1	11966361	11967209	849	DEL	3	7	0	0	4	2	0	0	0	1
CNVR_83	1	12246830	12247229	400	DEL	3	19	2	1	1	4	6	4	1	0
CNVR_84	1	12246924	12247186	263	DEL	2	1	0	0	0	1	0	0	0	0
CNVR_85	1	12389001	12393025	4025	DEL	3	64	19	0	5	23	10	5	1	1
CNVR_86	1	12408916	12418116	9201	DEL	2	2	0	0	1	0	0	0	0	1
CNVR_87	1	12500922	12507000	6079	DEL	3	76	16	0	20	14	11	7	5	3
CNVR_88	1	12602032	12665363	63332	DEL	2	17	6	0	4	0	1	5	0	1
CNVR_89	1	12681231	12684347	3117	DEL	4	11	1	0	10	0	0	0	0	0
CNVR_90	1	12909341	12909767	427	DEL	2	2	1	0	0	1	0	0	0	0
CNVR_91	1	12909424	12909767	344	DEL	2	13	1	0	0	5	3	4	0	0
CNVR_92	1	12926239	12939750	13512	DEL	2	1	0	0	0	0	0	0	1	0
CNVR_93	1	12999793	13000888	1096	DEL	2	2	0	0	0	2	0	0	0	0
CNVR_94	1	13104880	13106501	1622	DEL	2	1	0	0	0	0	1	0	0	0
CNVR_95	1	13149303	13150112	810	DEL	2	59	16	0	19	3	10	8	1	2
CNVR_96	1	13152751	13155750	3000	DEL	4	27	2	0	3	11	0	4	5	2
CNVR_97	1	13166009	13167283	1275	DEL	2	1	1	0	0	0	0	0	0	0
CNVR_98	1	13229701	13232243	2543	DEL	3	2	1	0	0	0	0	1	0	0
CNVR_99	1	13403619	13409118	5500	DEL	4	11	9	0	0	0	1	1	0	0
CNVR_100	1	13606861	13607656	796	DEL	2	2	0	0	0	0	2	0	0	0
CNVR_101	1	13613013	13614280	1268	DEL	2	2	0	0	0	0	2	0	0	0
CNVR_102	1	13619362	13620029	668	DEL	2	2	2	0	0	0	0	0	0	0
CNVR_103	1	13619604	13620017	414	DEL	2	13	2	0	1	4	2	1	2	1
CNVR_104	1	13687643	13694620	6978	DEL	3	81	20	0	23	8	17	10	0	3
CNVR_105	1	13779051	13779446	396	DEL	2	17	0	0	1	5	1	4	5	1
CNVR_106	1	13779066	13779640	575	DEL	2	3	0	0	1	0	1	1	0	0
CNVR_107	1	13782443	13917224	134782	DEL	2	3	0	0	0	2	0	1	0	0
CNVR_108	1	13831046	13832250	1205	DEL	3	26	3	0	3	11	6	2	1	0
CNVR_109	1	13914601	13922750	8150	DEL	3	4	1	0	1	0	0	2	0	0
CNVR_110	1	13976834	13978080	1247	DEL	3	27	7	2	7	1	4	3	2	1
CNVR_111	1	14002040	14003107	1068	DEL	2	2	0	0	1	0	1	0	0	0
CNVR_112	1	14045459	14045723	265	DEL	2	2	0	0	0	2	0	0	0	0
CNVR_113	1	14086649	14087128	480	DEL	3	35	5	0	5	8	3	7	4	3
CNVR_114	1	14134526	14134873	348	DEL	2	1	0	0	0	1	0	0	0	0
CNVR_115	1	14146956	14147445	490	DEL	2	23	0	0	7	6	3	2	2	3
CNVR_116	1	14216595	14218028	1434	DEL	4	86	22	0	18	6	18	13	6	3
CNVR_117	1	14323887	14325425	1539	DEL	3	78	16	0	21	10	16	11	1	3
CNVR_118	1	14405942	14406353	412	DEL	2	23	3	0	3	6	3	5	2	1
CNVR_119	1	14477532	14503122	25591	DEL	2	4	0	1	0	0	0	1	2	0
CNVR_120	1	14649724	14654655	4932	DEL	2	4	0	0	0	2	0	1	1	0
CNVR_121	1	14665689	14667155	1467	DEL	2	1	0	0	0	0	1	0	0	0
CNVR_122	1	14937191	14959285	22095	DEL	2	1	0	0	0	0	0	0	0	1
CNVR_123	1	14962273	14963397	1125	DEL	2	2	0	0	2	0	0	0	0	0
CNVR_124	1	14963550	14967038	3489	DEL	3	35	2	0	11	6	9	5	0	2
CNVR_125	1	14964916	14980786	15871	DEL	2	40	3	0	15	3	9	6	1	3
CNVR_126	1	14974908	14975718	811	DEL	3	65	3	0	20	12	10	12	5	3
CNVR_127	1	15058180	15062661	4482	DEL	3	7	0	0	0	4	0	2	1	0
CNVR_128	1	15580014	15586285	6272	DEL	2	2	0	0	0	1	0	0	1	0
CNVR_129	1	15585716	15591000	5285	DEL	4	26	4	0	8	3	4	4	1	2
CNVR_130	1	15723594	16115723	392130	DEL	2	4	0	0	0	1	0	1	1	1
CNVR_131	1	15723763	15724508	746	DEL	2	1	0	0	0	0	0	0	0	1
CNVR_132	1	15859667	15859837	171	DEL	2	1	0	0	0	1	0	0	0	0
CNVR_133	1	15862972	15866400	3429	DEL	4	28	15	0	6	1	3	1	0	2
CNVR_134	1	16058454	16067470	9017	DEL	2	7	2	0	4	0	0	0	0	1
CNVR_135	1	16138608	16139602	995	DEL	3	74	22	0	18	5	17	7	2	3
CNVR_136	1	16298383	16298566	184	DEL	2	1	0	0	0	1	0	0	0	0
CNVR_137	1	16563497	16564156	660	DEL	2	4	0	0	1	0	2	1	0	0
CNVR_138	1	16945429	16946234	806	DEL	3	114	22	0	20	24	23	15	9	1
CNVR_139	1	17185751	17187833	2083	DEL	3	1	0	0	0	0	0	1	0	0
CNVR_140	1	17304251	17305923	1673	DEL	3	10	0	0	1	1	5	1	1	1
CNVR_141	1	17430711	17432006	1296	DEL	2	1	0	0	0	1	0	0	0	0
CNVR_142	1	17718703	17719377	675	DUP	2	2	0	0	0	0	2	0	0	0
CNVR_143	1	17732501	17750750	18250	DEL	4	3	0	0	3	0	0	0	0	0
CNVR_144	1	17741420	17743115	1696	DEL	2	1	0	0	0	0	0	0	1	0
CNVR_145	1	17775335	17776040	706	DEL	3	38	12	0	6	6	9	4	1	0
CNVR_146	1	17814789	17819500	4712	DEL	2	1	0	0	0	1	0	0	0	0
CNVR_147	1	17909243	17909682	440	DEL	2	1	0	0	0	0	1	0	0	0
CNVR_148	1	17909260	17909990	731	DEL	2	1	0	0	0	0	0	0	0	1
CNVR_149	1	17965477	17966232	756	DEL	3	31	11	0	4	8	4	3	0	1
CNVR_150	1	17993048	17993687	640	DEL	2	1	0	0	0	0	0	1	0	0
CNVR_151	1	18021525	18028500	6976	DEL	3	1	0	0	0	0	0	1	0	0
CNVR_152	1	18053883	18054384	502	DEL	2	1	0	0	0	0	0	1	0	0
CNVR_153	1	18108789	18110100	1312	DEL	3	3	1	0	1	0	1	0	0	0
CNVR_154	1	18181300	18181700	401	DEL	2	2	0	0	0	2	0	0	0	0
CNVR_155	1	18217699	18218269	571	DEL	3	3	0	0	1	0	2	0	0	0
CNVR_156	1	18283358	18283977	620	DEL	2	3	1	0	1	0	1	0	0	0
CNVR_157	1	18283533	18283954	422	DEL	2	1	0	0	0	0	1	0	0	0
CNVR_158	1	18411805	18412577	773	DEL	3	10	5	0	0	0	5	0	0	0
CNVR_159	1	18745231	18748117	2887	DEL	2	2	0	0	0	0	1	1	0	0
CNVR_160	1	18794555	18795554	1000	DEL	2	4	1	0	1	0	0	2	0	0
CNVR_161	1	18794795	18795490	696	DEL	2	3	1	0	0	0	0	2	0	0
CNVR_162	1	18855901	18883750	27850	DEL	3	2	2	0	0	0	0	0	0	0
CNVR_163	1	19249870	19251250	1381	DEL	3	10	0	1	2	5	0	2	0	0
CNVR_164	1	19360221	19362915	2695	DEL	2	1	0	0	0	0	1	0	0	0
CNVR_165	1	19396573	19396739	167	DEL	2	1	0	0	0	1	0	0	0	0
CNVR_166	1	19717361	19717547	187	DEL	2	2	0	0	0	2	0	0	0	0
CNVR_167	1	19869187	19869482	296	DEL	2	3	0	0	0	2	0	1	0	0
CNVR_168	1	20165697	20172300	6604	DEL	4	4	0	0	2	0	0	0	2	0
CNVR_169	1	20249362	20362418	113057	DEL	2	3	0	0	0	3	0	0	0	0
CNVR_170	1	20534501	20537268	2768	DEL	3	3	0	0	0	0	3	0	0	0
CNVR_171	1	20547326	20547997	672	DEL	2	2	2	0	0	0	0	0	0	0
CNVR_172	1	20707573	20708215	643	DEL	3	21	6	0	4	2	5	4	0	0
CNVR_173	1	20817506	20819641	2136	DEL	2	1	0	0	1	0	0	0	0	0
CNVR_174	1	20821281	20866965	45685	DEL	2	2	0	0	1	0	1	0	0	0
CNVR_175	1	20855475	20857038	1564	DEL	3	86	20	1	18	14	14	13	3	3
CNVR_176	1	20867171	20868466	1296	DEL	2	2	2	0	0	0	0	0	0	0
CNVR_177	1	21037251	21037582	332	DEL	2	4	0	0	0	4	0	0	0	0
CNVR_178	1	21067212	21068322	1111	DEL	3	7	7	0	0	0	0	0	0	0
CNVR_179	1	21300217	21301800	1584	DEL	2	2	0	0	1	0	0	1	0	0
CNVR_180	1	21301094	21302646	1553	DEL	2	2	1	0	1	0	0	0	0	0
CNVR_181	1	21346745	21347225	481	DEL	2	1	1	0	0	0	0	0	0	0
CNVR_182	1	21534501	21537750	3250	DEL	2	2	0	0	0	2	0	0	0	0
CNVR_183	1	21930986	21932373	1388	DEL	3	6	0	1	0	1	0	2	2	0
CNVR_184	1	22397291	22397882	592	DEL	2	3	1	0	1	0	0	1	0	0
CNVR_185	1	22397373	22397752	380	DEL	2	2	0	0	0	0	0	1	0	1
CNVR_186	1	22416856	22418574	1719	DEL	4	61	21	0	13	4	14	4	2	3
CNVR_187	1	22426993	22621091	194099	DEL	3	11	3	0	3	1	2	1	0	1
CNVR_188	1	22478606	22479461	856	DEL	4	14	3	0	3	1	5	1	0	1
CNVR_189	1	22609119	22613552	4434	DEL	3	42	7	1	8	4	8	11	1	2
CNVR_190	1	22961001	22966500	5500	DUP	2	8	3	0	3	2	0	0	0	0
CNVR_191	1	23068852	23069527	676	DEL	3	5	1	0	2	0	1	1	0	0
CNVR_192	1	23415759	23416493	735	DEL	2	1	1	0	0	0	0	0	0	0
CNVR_193	1	23676109	23676453	345	DEL	2	2	0	0	0	0	0	0	2	0
CNVR_194	1	23735314	23737043	1730	DEL	2	5	0	0	3	0	0	1	0	1
CNVR_195	1	23765393	23768853	3461	DEL	2	1	0	0	1	0	0	0	0	0
CNVR_196	1	24010210	24010616	407	DEL	2	1	0	0	0	1	0	0	0	0
CNVR_197	1	24049655	24050900	1246	DEL	2	43	12	0	7	6	10	5	3	0
CNVR_198	1	24073990	24075000	1011	DEL	3	2	0	0	0	0	0	1	0	1
CNVR_199	1	24079270	24080624	1355	DEL	4	23	2	0	4	8	0	8	1	0
CNVR_200	1	24129873	25144798	1014926	DEL	2	2	0	0	0	2	0	0	0	0
CNVR_201	1	24317620	24319047	1428	DEL	3	4	0	0	3	0	0	0	1	0
CNVR_202	1	25051470	25053152	1683	DEL	3	2	0	0	1	0	1	0	0	0
CNVR_203	1	25077751	25082000	4250	DEL	3	102	19	0	13	33	22	6	7	2
CNVR_204	1	25224751	25239250	14500	DEL	4	4	0	0	0	4	0	0	0	0
CNVR_205	1	25226864	25227476	613	DEL	3	4	1	0	0	0	2	0	0	1
CNVR_206	1	25306390	25306899	510	DEL	2	1	0	0	0	0	0	1	0	0
CNVR_207	1	25598101	25600002	1902	DEL	3	7	2	0	4	0	1	0	0	0
CNVR_208	1	25599165	25599939	775	DEL	2	1	1	0	0	0	0	0	0	0
CNVR_209	1	25855001	25857000	2000	DEL	3	6	0	0	0	3	0	0	3	0
CNVR_210	1	26109112	26109748	637	DEL	2	1	0	0	0	0	0	1	0	0
CNVR_211	1	26235896	26236684	789	DEL	3	47	7	0	15	7	7	7	3	1
CNVR_212	1	26295767	26296039	273	DEL	2	3	0	0	0	3	0	0	0	0
CNVR_213	1	26483428	26484197	770	DEL	2	1	0	0	1	0	0	0	0	0
CNVR_214	1	26487459	26488334	876	DEL	2	14	1	0	0	3	2	5	3	0
CNVR_215	1	26487459	26488936	1478	DEL	2	11	1	0	0	5	0	4	1	0
CNVR_216	1	26488372	26488954	583	DEL	3	57	1	2	0	18	6	16	14	0
CNVR_217	1	26524249	26532250	8002	DEL	3	1	0	0	0	0	0	1	0	0
CNVR_218	1	26650052	26650726	675	DEL	2	2	1	0	0	1	0	0	0	0
CNVR_219	1	26664175	26665561	1387	DEL	3	3	0	0	1	0	2	0	0	0
CNVR_220	1	26665041	26672293	7253	DEL	3	17	3	0	5	3	3	1	2	0
CNVR_221	1	26722764	26723655	892	DEL	2	1	1	0	0	0	0	0	0	0
CNVR_222	1	27294218	27295778	1561	DEL	4	77	18	1	14	11	17	11	4	1
CNVR_223	1	27440699	27441294	596	DEL	2	1	1	0	0	0	0	0	0	0
CNVR_224	1	27498843	27499442	600	DEL	2	1	0	0	0	0	0	1	0	0
CNVR_225	1	27498895	27499212	318	DEL	2	7	0	0	0	4	2	1	0	0
CNVR_226	1	27530694	27530937	244	DEL	2	1	0	0	0	0	0	0	1	0
CNVR_227	1	27559448	27560363	916	DEL	3	114	20	0	21	23	21	19	8	2
CNVR_228	1	27608501	27609274	774	DEL	4	5	0	0	1	0	0	4	0	0
CNVR_229	1	27667001	27673500	6500	DEL	4	4	0	0	0	2	0	0	0	2
CNVR_230	1	27725914	27726228	315	DEL	2	1	0	0	0	0	0	0	1	0
CNVR_231	1	27728600	27750122	21523	DEL	3	2	0	0	0	0	0	0	0	2
CNVR_232	1	27936673	27937627	955	DEL	2	12	3	0	3	2	3	0	0	1
CNVR_233	1	27936870	27937476	607	DEL	2	1	0	0	1	0	0	0	0	0
CNVR_234	1	28141708	28143600	1893	DEL	3	48	6	0	15	6	13	7	0	1
CNVR_235	1	28303778	28304660	883	DEL	2	11	2	0	5	0	2	0	2	0
CNVR_236	1	28303978	28304618	641	DEL	3	70	14	0	12	10	18	7	6	3
CNVR_237	1	28408997	28412568	3572	DEL	3	1	0	0	0	0	1	0	0	0
CNVR_238	1	28806263	28918869	112607	DEL	2	8	2	0	4	0	2	0	0	0
CNVR_239	1	28814811	28815110	300	DEL	2	5	0	0	0	4	1	0	0	0
CNVR_240	1	29001322	29003449	2128	DEL	2	6	0	0	0	5	0	0	1	0
CNVR_241	1	29313910	29315168	1259	DEL	2	1	0	0	0	0	0	0	0	1
CNVR_242	1	29316501	29320000	3500	DEL	3	6	0	0	0	4	0	1	1	0
CNVR_243	1	29343875	35583304	6239430	DEL	2	1	0	0	0	1	0	0	0	0
CNVR_244	1	29426744	29427063	320	DEL	2	1	0	0	0	0	1	0	0	0
CNVR_245	1	29432401	29434807	2407	DEL	3	27	12	0	7	0	4	3	0	1
CNVR_246	1	29505405	29506150	746	DEL	2	1	0	0	0	1	0	0	0	0
CNVR_247	1	29651291	29652808	1518	DEL	2	2	0	0	0	0	2	0	0	0
CNVR_248	1	29741783	29742689	907	DEL	2	1	0	0	0	0	1	0	0	0
CNVR_249	1	29901697	29903527	1831	DEL	2	1	0	0	1	0	0	0	0	0
CNVR_250	1	29948306	29949347	1042	DEL	4	86	18	1	18	11	17	10	8	3
CNVR_251	1	30015197	30015642	446	DEL	2	7	1	0	0	4	1	1	0	0
CNVR_252	1	30302153	30303750	1598	DEL	2	1	1	0	0	0	0	0	0	0
CNVR_253	1	31144396	31145376	981	DEL	2	27	10	0	10	0	4	0	0	3
CNVR_254	1	31163028	31169480	6453	DEL	3	2	1	0	0	0	1	0	0	0
CNVR_255	1	31324465	31324930	466	DEL	3	9	0	0	0	0	4	3	2	0
CNVR_256	1	31351971	31354401	2431	DEL	2	12	1	0	2	1	4	0	4	0
CNVR_257	1	31460244	31461652	1409	DEL	3	5	0	0	4	0	0	0	0	1
CNVR_258	1	31465091	31467336	2246	DEL	3	1	0	0	0	0	0	0	0	1
CNVR_259	1	31485599	31486534	936	DEL	3	56	20	0	16	7	5	3	3	2
CNVR_260	1	31664501	31673100	8600	DUP	2	5	5	0	0	0	0	0	0	0
CNVR_261	1	31668977	31670131	1155	DEL	3	41	6	0	8	17	4	2	1	3
CNVR_262	1	31807864	33295426	1487563	DEL	2	16	1	0	4	5	2	2	0	2
CNVR_263	1	31812562	31813539	978	DEL	3	8	1	0	2	4	0	0	0	1
CNVR_264	1	31832964	31833557	594	DEL	2	11	2	0	1	4	2	2	0	0
CNVR_265	1	31833082	31833557	476	DEL	2	7	1	0	1	1	1	0	3	0
CNVR_266	1	31858717	31859827	1111	DEL	2	43	15	0	14	6	4	1	0	3
CNVR_267	1	31883101	31896096	12996	DEL	4	4	0	0	1	0	3	0	0	0
CNVR_268	1	31901352	31902297	946	DEL	2	2	1	0	0	0	0	0	0	1
CNVR_269	1	31926397	31927258	862	DEL	3	4	0	0	3	0	0	0	0	1
CNVR_270	1	32134251	32148000	13750	DEL	4	9	1	0	0	0	4	0	3	1
CNVR_271	1	32144979	32146200	1222	DEL	3	5	1	0	2	0	0	0	0	2
CNVR_272	1	32202777	32204414	1638	DEL	3	35	11	0	12	3	5	1	0	3
CNVR_273	1	32550699	32551830	1132	DEL	4	29	7	0	17	0	2	0	1	2
CNVR_274	1	32655258	32655627	370	DEL	3	7	0	0	0	0	0	4	2	1
CNVR_275	1	32657157	32657741	585	DEL	2	9	3	0	2	0	0	2	2	0
CNVR_276	1	32994747	32995014	268	DEL	2	6	0	0	0	6	0	0	0	0
CNVR_277	1	33278593	33282047	3455	DEL	4	5	5	0	0	0	0	0	0	0
CNVR_278	1	33309102	33309288	187	DEL	2	1	0	0	0	1	0	0	0	0
CNVR_279	1	33408001	33421250	13250	DEL	4	6	0	0	5	0	0	1	0	0
CNVR_280	1	33445872	33447308	1437	DEL	2	6	0	0	0	5	0	0	1	0
CNVR_281	1	33447379	33447717	339	DUP	2	5	2	0	0	0	0	3	0	0
CNVR_282	1	33519912	33521112	1201	DEL	3	11	0	0	10	0	0	1	0	0
CNVR_283	1	33550254	33552035	1782	DEL	2	4	2	0	1	0	1	0	0	0
CNVR_284	1	33618297	33619847	1551	DEL	2	1	0	0	0	0	0	1	0	0
CNVR_285	1	33707751	33710000	2250	DEL	3	28	4	0	5	3	13	0	3	0
CNVR_286	1	33723001	33725205	2205	DEL	3	28	4	0	6	3	11	0	4	0
CNVR_287	1	33755736	33756899	1164	DEL	3	35	8	0	12	2	7	3	1	2
CNVR_288	1	33902101	33913500	11400	DEL	3	8	2	0	4	0	2	0	0	0
CNVR_289	1	33965485	33998631	33147	DEL	2	1	1	0	0	0	0	0	0	0
CNVR_290	1	33991886	33992427	542	DEL	2	5	0	0	0	4	0	0	1	0
CNVR_291	1	33998001	34003500	5500	DEL	4	65	12	0	10	16	11	9	5	2
CNVR_292	1	34181600	34182513	914	DEL	2	24	8	0	5	0	5	3	0	3
CNVR_293	1	34182596	34183581	986	DEL	2	2	0	0	1	0	0	0	0	1
CNVR_294	1	34182887	34183548	662	DEL	2	2	1	0	1	0	0	0	0	0
CNVR_295	1	34183037	34183489	453	DEL	2	2	0	0	0	2	0	0	0	0
CNVR_296	1	34193391	34194187	797	DEL	2	33	9	0	9	6	6	1	1	1
CNVR_297	1	34532401	34535087	2687	DEL	2	2	0	0	0	0	0	0	2	0
CNVR_298	1	34534224	34534988	765	DEL	2	5	1	0	1	1	1	1	0	0
CNVR_299	1	34534377	34534988	612	DEL	3	49	9	0	9	7	13	6	4	1
CNVR_300	1	34611501	34618500	7000	DEL	2	3	0	0	0	3	0	0	0	0
CNVR_301	1	34611719	34612713	995	DEL	4	62	17	1	8	12	9	12	1	2
CNVR_302	1	34833384	34834072	689	DEL	2	1	1	0	0	0	0	0	0	0
CNVR_303	1	34921960	34924000	2041	DEL	3	2	0	0	0	0	0	1	1	0
CNVR_304	1	35117251	35123650	6400	DEL	3	38	1	0	11	3	4	13	4	2
CNVR_305	1	35205768	35206024	257	DEL	2	1	0	0	0	1	0	0	0	0
CNVR_306	1	35362946	35366208	3263	DEL	3	3	1	0	0	1	0	0	1	0
CNVR_307	1	35453837	35454195	359	DEL	2	2	0	0	1	0	0	1	0	0
CNVR_308	1	35639263	35644076	4814	DEL	2	1	0	0	0	0	1	0	0	0
CNVR_309	1	35660785	35688142	27358	DEL	3	18	2	0	2	2	2	7	3	0
CNVR_310	1	35660859	35716251	55393	DEL	2	26	6	0	8	0	7	2	0	3
CNVR_311	1	35688225	35716363	28139	DEL	2	58	11	0	12	6	12	11	3	3
CNVR_312	1	35853822	35854660	839	DEL	3	6	0	0	5	0	0	1	0	0
CNVR_313	1	35863476	35864309	834	DEL	3	114	23	1	22	23	22	12	8	3
CNVR_314	1	35869511	35870373	863	DEL	2	2	0	0	2	0	0	0	0	0
CNVR_315	1	35930859	35931686	828	DEL	2	2	0	0	0	2	0	0	0	0
CNVR_316	1	36105301	36108795	3495	DUP	2	1	1	0	0	0	0	0	0	0
CNVR_317	1	36204718	36207263	2546	DEL	2	1	0	0	0	0	1	0	0	0
CNVR_318	1	36224471	36227452	2982	DEL	2	9	4	0	2	0	2	0	0	1
CNVR_319	1	36348327	36350500	2174	DEL	3	12	1	0	0	0	2	7	1	1
CNVR_320	1	36406501	36410500	4000	DEL	3	36	7	0	5	13	9	2	0	0
CNVR_321	1	36492236	36493113	878	DEL	2	6	0	0	0	2	3	1	0	0
CNVR_322	1	36493854	36495377	1524	DEL	3	5	0	0	0	1	4	0	0	0
CNVR_323	1	36884307	36885227	921	DEL	2	7	0	0	5	0	1	0	1	0
CNVR_324	1	36884489	36885227	739	DEL	3	99	9	1	17	25	19	14	11	3
CNVR_325	1	36890543	36894660	4118	DEL	2	5	2	0	3	0	0	0	0	0
CNVR_326	1	36890907	36891747	841	DEL	3	4	0	0	4	0	0	0	0	0
CNVR_327	1	36911251	36924750	13500	DEL	3	2	0	0	0	0	0	0	2	0
CNVR_328	1	36927846	36929522	1677	DEL	3	129	15	1	18	34	20	22	16	3
CNVR_329	1	37049799	37051240	1442	DEL	3	30	9	0	0	1	8	11	0	1
CNVR_330	1	37274487	37274774	288	DEL	2	2	0	0	0	2	0	0	0	0
CNVR_331	1	37282990	37317272	34283	DEL	2	1	0	0	0	0	1	0	0	0
CNVR_332	1	37695979	37696236	258	DEL	2	1	0	0	0	0	0	1	0	0
CNVR_333	1	38242201	38256314	14114	DEL	2	1	1	0	0	0	0	0	0	0
CNVR_334	1	38274222	38275252	1031	DEL	2	1	0	0	1	0	0	0	0	0
CNVR_335	1	38276366	38276913	548	DEL	2	14	3	0	1	4	1	1	3	1
CNVR_336	1	38480701	38482141	1441	DEL	4	97	22	0	21	19	16	6	10	3
CNVR_337	1	38575501	38584500	9000	DEL	3	10	3	0	0	2	2	2	1	0
CNVR_338	1	39069224	39070859	1636	DEL	2	2	0	0	0	0	2	0	0	0
CNVR_339	1	39153897	39154875	979	DEL	3	128	24	0	24	30	20	17	10	3
CNVR_340	1	39466146	39467127	982	DEL	2	49	3	2	4	16	6	9	8	1
CNVR_341	1	39497302	39498847	1546	DEL	2	5	0	0	2	0	2	1	0	0
CNVR_342	1	39805501	39811504	6004	DEL	4	9	2	0	1	3	2	1	0	0
CNVR_343	1	39868295	39870009	1715	DEL	2	1	0	0	0	0	1	0	0	0
CNVR_344	1	39903843	39905235	1393	DEL	2	5	0	0	2	1	2	0	0	0
CNVR_345	1	39909928	39911943	2016	DEL	2	2	1	0	1	0	0	0	0	0
CNVR_346	1	39986377	39986676	300	DEL	2	3	0	0	0	3	0	0	0	0
CNVR_347	1	40003726	40007895	4170	DEL	2	1	0	0	0	1	0	0	0	0
CNVR_348	1	40112401	40113900	1500	DEL	2	1	0	0	0	0	1	0	0	0
CNVR_349	1	40270794	40271778	985	DEL	2	6	5	0	0	0	1	0	0	0
CNVR_350	1	40327501	40330607	3107	DEL	4	1	0	0	1	0	0	0	0	0
CNVR_351	1	40392854	40393750	897	DEL	2	7	2	0	3	0	0	1	0	1
CNVR_352	1	40586950	40587756	807	DEL	3	1	0	0	1	0	0	0	0	0
CNVR_353	1	40914234	40914582	349	DEL	2	7	0	0	0	4	1	1	1	0
CNVR_354	1	40962251	40973750	11500	DEL	4	22	6	0	2	8	3	0	3	0
CNVR_355	1	41246347	41247870	1524	DEL	4	55	13	0	17	4	17	2	1	1
CNVR_356	1	41250779	44261260	3010482	DEL	2	1	0	0	1	0	0	0	0	0
CNVR_357	1	41836220	41836985	766	DEL	3	22	5	0	4	6	3	1	1	2
CNVR_358	1	41836294	41836942	649	DEL	3	43	9	0	6	10	6	9	3	0
CNVR_359	1	41873522	41874146	625	DEL	2	1	0	0	0	0	1	0	0	0
CNVR_360	1	41945752	41945908	157	DEL	2	1	0	0	0	1	0	0	0	0
CNVR_361	1	41972369	41973548	1180	DEL	2	4	0	0	2	0	1	0	0	1
CNVR_362	1	42083830	42085791	1962	DEL	3	8	0	0	1	2	3	0	2	0
CNVR_363	1	42120901	42198046	77146	DEL	3	5	0	0	4	0	0	1	0	0
CNVR_364	1	42145315	42171397	26083	DEL	2	2	0	0	0	1	0	0	1	0
CNVR_365	1	42289744	42290973	1230	DEL	2	1	1	0	0	0	0	0	0	0
CNVR_366	1	42385886	42386639	754	DEL	2	1	0	0	0	0	1	0	0	0
CNVR_367	1	42435601	42436800	1200	DEL	4	37	3	2	6	13	1	5	7	0
CNVR_368	1	42479101	42481200	2100	DEL	4	2	0	0	0	0	0	0	1	1
CNVR_369	1	42685655	43651254	965600	DEL	2	1	0	0	0	0	1	0	0	0
CNVR_370	1	42850210	42851148	939	DEL	3	18	6	0	2	6	0	1	2	1
CNVR_371	1	43026601	43034400	7800	DEL	3	6	2	0	4	0	0	0	0	0
CNVR_372	1	43345623	43349436	3814	DEL	3	16	0	0	7	1	3	4	0	1
CNVR_373	1	43515896	43516643	748	DEL	3	25	10	0	2	0	5	3	5	0
CNVR_374	1	44073968	44075088	1121	DEL	2	1	0	0	0	0	0	1	0	0
CNVR_375	1	44176251	44179750	3500	DEL	2	5	3	0	1	0	0	1	0	0
CNVR_376	1	44178382	44179719	1338	DEL	2	54	10	0	18	6	8	7	2	3
CNVR_377	1	44495257	45140243	644987	DEL	2	1	0	0	0	0	0	1	0	0
CNVR_378	1	44601607	44602740	1134	DEL	2	30	11	0	8	1	4	2	1	3
CNVR_379	1	44805556	44837274	31719	DEL	2	11	4	0	2	2	3	0	0	0
CNVR_380	1	44875179	44875565	387	DEL	2	2	0	0	0	1	1	0	0	0
CNVR_381	1	44906942	44907898	957	DEL	2	13	3	0	1	0	1	4	4	0
CNVR_382	1	44971123	44972636	1514	DEL	3	6	1	0	1	0	0	4	0	0
CNVR_383	1	45238416	45246540	8125	DEL	2	3	0	0	0	2	0	0	0	1
CNVR_384	1	45783626	45789227	5602	DEL	2	1	0	0	0	1	0	0	0	0
CNVR_385	1	45911406	46008645	97240	DEL	2	1	0	0	1	0	0	0	0	0
CNVR_386	1	45971242	45974195	2954	DEL	2	2	0	0	0	0	0	2	0	0
CNVR_387	1	46184401	46193100	8700	DEL	2	1	0	0	1	0	0	0	0	0
CNVR_388	1	46284404	46284782	379	DEL	2	1	0	0	0	1	0	0	0	0
CNVR_389	1	46335549	46336368	820	DEL	2	27	4	0	6	3	4	6	3	1
CNVR_390	1	46353756	46354705	950	DEL	2	1	0	0	0	0	0	0	1	0
CNVR_391	1	46387215	46387458	244	DEL	2	1	0	0	0	1	0	0	0	0
CNVR_392	1	46661513	46662704	1192	DEL	3	27	7	0	3	2	8	5	2	0
CNVR_393	1	46748701	46757400	8700	DEL	3	1	1	0	0	0	0	0	0	0
CNVR_394	1	46931888	46932528	641	DEL	4	15	2	0	5	2	1	5	0	0
CNVR_395	1	47069463	47070458	996	DEL	3	12	1	0	3	3	0	5	0	0
CNVR_396	1	47070957	47071972	1016	DEL	2	2	0	0	0	0	0	2	0	0
CNVR_397	1	47071297	47072105	809	DEL	2	2	1	0	0	1	0	0	0	0
CNVR_398	1	47072082	47072404	323	DEL	2	1	0	0	0	0	0	1	0	0
CNVR_399	1	47195003	47195843	841	DEL	4	70	14	1	16	7	7	16	7	2
CNVR_400	1	47211501	47213340	1840	DEL	3	3	0	0	0	3	0	0	0	0
CNVR_401	1	47261117	47261601	485	DEL	2	1	0	0	0	0	1	0	0	0
CNVR_402	1	47406347	47675855	269509	DEL	3	8	1	0	1	0	3	1	2	0
CNVR_403	1	47441884	47451183	9300	DEL	2	2	0	0	0	0	0	0	2	0
CNVR_404	1	47656040	47671201	15162	DEL	3	1	0	0	0	0	1	0	0	0
CNVR_405	1	47770199	47770994	796	DEL	2	1	0	0	0	1	0	0	0	0
CNVR_406	1	47775139	47776868	1730	DEL	3	12	0	0	11	0	0	0	0	1
CNVR_407	1	47937918	47938548	631	DEL	2	1	1	0	0	0	0	0	0	0
CNVR_408	1	48017714	48019140	1427	DEL	3	96	20	0	21	26	14	8	4	3
CNVR_409	1	48025571	48026552	982	DEL	4	88	18	0	18	22	14	8	5	3
CNVR_410	1	48046318	48046527	210	DEL	2	2	0	0	0	2	0	0	0	0
CNVR_411	1	48079751	48082300	2550	DEL	4	26	5	0	7	0	3	8	3	0
CNVR_412	1	48131185	48131436	252	DEL	2	1	0	0	0	1	0	0	0	0
CNVR_413	1	48153751	48155752	2002	DEL	4	54	7	0	20	2	7	10	7	1
CNVR_414	1	48339029	48339335	307	DEL	2	7	1	0	0	6	0	0	0	0
CNVR_415	1	48365135	48374562	9428	DEL	3	22	6	0	8	3	2	2	0	1
CNVR_416	1	48396022	48398929	2908	DEL	2	4	3	0	1	0	0	0	0	0
CNVR_417	1	48517251	48520844	3594	DEL	3	91	22	0	20	17	17	11	1	3
CNVR_418	1	48749077	48749742	666	DEL	2	6	0	0	3	3	0	0	0	0
CNVR_419	1	48834251	48836250	2000	DEL	3	2	0	0	0	0	0	0	2	0
CNVR_420	1	48961410	48961741	332	DEL	2	1	0	0	0	1	0	0	0	0
CNVR_421	1	49099738	49100546	809	DEL	4	90	19	0	15	21	16	9	7	3
CNVR_422	1	49156461	49223575	67115	DEL	3	61	17	1	16	3	18	3	1	2
CNVR_423	1	49199751	49207250	7500	DEL	3	17	0	0	11	4	0	1	0	1
CNVR_424	1	49221751	49224600	2850	DEL	3	1	0	0	1	0	0	0	0	0
CNVR_425	1	49274445	49275216	772	DEL	2	1	0	0	0	0	0	1	0	0
CNVR_426	1	49402907	49404343	1437	DEL	3	48	13	0	13	10	5	2	2	3
CNVR_427	1	49506616	49507171	556	DEL	2	1	0	0	0	0	0	1	0	0
CNVR_428	1	49551521	49551934	414	DEL	2	1	0	0	1	0	0	0	0	0
CNVR_429	1	49592540	49593711	1172	DEL	3	4	0	0	2	2	0	0	0	0
CNVR_430	1	49655613	49663089	7477	DEL	4	1	1	0	0	0	0	0	0	0
CNVR_431	1	49717156	49717753	598	DEL	3	22	1	0	4	2	9	1	5	0
CNVR_432	1	49783501	49788075	4575	DEL	3	2	0	0	0	0	0	2	0	0
CNVR_433	1	49904886	49906287	1402	DEL	3	14	13	0	1	0	0	0	0	0
CNVR_434	1	49925499	49925834	336	DEL	2	1	0	0	0	1	0	0	0	0
CNVR_435	1	50079006	50079533	528	DEL	2	2	1	0	0	0	0	0	1	0
CNVR_436	1	50143731	50144038	308	DEL	2	2	0	0	0	1	0	0	1	0
CNVR_437	1	50149001	50155750	6750	DEL	3	151	24	1	25	41	22	26	9	3
CNVR_438	1	50180220	50182618	2399	DEL	2	3	0	0	0	3	0	0	0	0
CNVR_439	1	50193301	50194800	1500	DEL	2	6	1	0	1	0	3	0	0	1
CNVR_440	1	50453475	50455465	1991	DEL	2	1	0	0	0	0	1	0	0	0
CNVR_441	1	50553966	50555238	1273	DEL	3	46	1	0	13	25	2	0	3	2
CNVR_442	1	50893202	50894192	991	DEL	3	57	18	0	13	6	10	8	1	1
CNVR_443	1	50952356	50953040	685	DEL	3	2	0	0	1	0	0	1	0	0
CNVR_444	1	51022575	51023537	963	DEL	3	49	13	0	9	13	7	5	0	2
CNVR_445	1	51024965	51026077	1113	DEL	3	5	0	0	0	3	0	0	1	1
CNVR_446	1	51299138	51300852	1715	DEL	2	1	0	0	0	0	0	1	0	0
CNVR_447	1	51325410	51326307	898	DEL	2	4	0	0	2	1	0	1	0	0
CNVR_448	1	51426378	51427108	731	DEL	2	10	5	0	0	0	0	1	3	1
CNVR_449	1	51426465	51426992	528	DEL	3	14	4	0	0	3	2	3	1	1
CNVR_450	1	51457995	51483655	25661	DEL	2	1	0	0	1	0	0	0	0	0
CNVR_451	1	51563192	51563786	595	DEL	2	3	0	0	1	1	0	1	0	0
CNVR_452	1	51674894	51689201	14308	DEL	2	2	0	0	0	0	0	2	0	0
CNVR_453	1	51700751	51702400	1650	DEL	3	63	13	1	19	1	16	10	1	2
CNVR_454	1	51780205	51781856	1652	DEL	2	3	3	0	0	0	0	0	0	0
CNVR_455	1	52056897	52057869	973	DEL	3	9	2	0	1	0	0	6	0	0
CNVR_456	1	52118501	52124750	6250	DEL	4	33	2	0	9	3	9	9	1	0
CNVR_457	1	52299501	52301520	2020	DEL	3	28	5	0	8	8	2	5	0	0
CNVR_458	1	52340899	52341591	693	DEL	2	1	0	0	0	0	0	0	1	0
CNVR_459	1	52458001	52466700	8700	DEL	3	15	8	0	5	0	2	0	0	0
CNVR_460	1	53638793	56492404	2853612	DEL	2	5	0	0	3	1	0	1	0	0
CNVR_461	1	53763102	53764052	951	DEL	3	1	0	0	0	1	0	0	0	0
CNVR_462	1	53952851	53954000	1150	DEL	3	9	4	0	1	3	1	0	0	0
CNVR_463	1	54009801	54011146	1346	DEL	3	3	0	0	0	0	2	1	0	0
CNVR_464	1	54128062	54129272	1211	DEL	4	53	8	0	12	8	7	14	3	1
CNVR_465	1	54415090	54418792	3703	DEL	2	2	0	0	1	0	0	0	0	1
CNVR_466	1	54422040	54422252	213	DEL	2	1	0	0	0	1	0	0	0	0
CNVR_467	1	54503068	54504756	1689	DEL	4	58	15	0	17	6	9	3	5	3
CNVR_468	1	54972114	54972504	391	DEL	2	1	0	0	0	0	0	1	0	0
CNVR_469	1	55314601	55323627	9027	DEL	4	9	1	0	6	0	2	0	0	0
CNVR_470	1	55452656	55453452	797	DEL	3	35	7	0	14	0	13	0	1	0
CNVR_471	1	55488304	55490092	1789	DEL	2	2	1	0	0	0	0	0	0	1
CNVR_472	1	55613095	55624578	11484	DEL	2	1	0	0	0	1	0	0	0	0
CNVR_473	1	55645013	55679238	34226	DEL	2	3	1	0	1	0	0	0	0	1
CNVR_474	1	55654499	55655185	687	DEL	2	3	1	0	1	1	0	0	0	0
CNVR_475	1	55654708	55655211	504	DEL	3	24	4	0	5	2	9	3	1	0
CNVR_476	1	55654750	55655445	696	DEL	2	1	1	0	0	0	0	0	0	0
CNVR_477	1	55657974	55659774	1801	DEL	4	157	24	2	24	40	26	19	19	3
CNVR_478	1	55738783	55739317	535	DEL	2	17	0	1	1	6	3	3	3	0
CNVR_479	1	55738848	55739577	730	DEL	2	4	1	0	2	1	0	0	0	0
CNVR_480	1	55872501	55875300	2800	DEL	2	24	14	0	2	0	6	0	0	2
CNVR_481	1	55936134	55937875	1742	DEL	3	9	0	0	0	0	0	9	0	0
CNVR_482	1	56123132	56123459	328	DEL	2	1	0	0	0	1	0	0	0	0
CNVR_483	1	56456967	56460807	3841	DEL	2	1	0	0	0	0	1	0	0	0
CNVR_484	1	56543164	56543915	752	DEL	2	4	1	0	1	0	2	0	0	0
CNVR_485	1	56543387	56543913	527	DEL	3	7	1	0	0	2	1	2	1	0
CNVR_486	1	56578026	56578296	271	DEL	2	1	0	0	0	1	0	0	0	0
CNVR_487	1	56585456	56586826	1371	DEL	3	9	0	0	1	1	1	0	6	0
CNVR_488	1	56739251	56745481	6231	DEL	3	4	0	0	4	0	0	0	0	0
CNVR_489	1	56836127	56837265	1139	DEL	4	58	15	1	16	3	6	4	11	2
CNVR_490	1	57031979	57032244	266	DEL	2	6	0	0	0	4	0	2	0	0
CNVR_491	1	57346105	57347075	971	DEL	3	74	19	0	11	17	17	7	2	1
CNVR_492	1	57373469	57375250	1782	DEL	2	6	4	0	0	0	2	0	0	0
CNVR_493	1	57441751	57486000	44250	DEL	3	27	0	2	0	15	1	4	5	0
CNVR_494	1	57552988	57554250	1263	DEL	3	2	0	0	0	0	0	1	1	0
CNVR_495	1	57578862	57591063	12202	DEL	2	15	2	0	3	1	6	3	0	0
CNVR_496	1	57647251	57660262	13012	DEL	3	3	2	0	0	0	1	0	0	0
CNVR_497	1	57946229	57947151	923	DEL	3	8	2	0	1	0	1	4	0	0
CNVR_498	1	58016811	58018426	1616	DEL	4	50	15	0	13	7	9	3	1	2
CNVR_499	1	58065601	58066242	642	DEL	4	4	1	0	1	1	0	0	0	1
CNVR_500	1	58078948	58101158	22211	DEL	2	1	1	0	0	0	0	0	0	0
CNVR_501	1	58308069	58309419	1351	DEL	2	16	6	0	4	2	1	0	1	2
CNVR_502	1	58380271	58382543	2273	DEL	4	59	13	0	11	24	2	1	5	3
CNVR_503	1	58546086	58546341	256	DEL	2	1	0	0	0	0	0	0	1	0
CNVR_504	1	58654801	58665900	11100	DUP	2	8	0	0	1	0	4	3	0	0
CNVR_505	1	58670101	58673100	3000	DEL	2	2	1	0	1	0	0	0	0	0
CNVR_506	1	58672483	58847143	174661	DEL	2	5	0	0	2	0	2	1	0	0
CNVR_507	1	58765378	60438903	1673526	DEL	2	1	0	0	0	0	0	1	0	0
CNVR_508	1	59746195	59756750	10556	DEL	3	6	3	0	2	0	0	0	0	1
CNVR_509	1	60454019	60454343	325	DEL	3	9	0	0	0	5	3	0	0	1
CNVR_510	1	60932435	60932999	565	DEL	2	2	0	0	0	1	1	0	0	0
CNVR_511	1	60945312	60947264	1953	DEL	3	11	8	1	0	0	1	0	1	0
CNVR_512	1	61113558	61114645	1088	DEL	3	12	5	0	4	1	1	1	0	0
CNVR_513	1	61277279	61277669	391	DEL	2	2	0	0	0	2	0	0	0	0
CNVR_514	1	61334707	61335439	733	DEL	2	8	3	0	1	1	1	2	0	0
CNVR_515	1	61334775	61335278	504	DEL	2	1	1	0	0	0	0	0	0	0
CNVR_516	1	61368601	61376121	7521	DEL	4	1	0	0	0	0	0	0	0	1
CNVR_517	1	61547014	61547215	202	DEL	2	3	0	0	0	2	1	0	0	0
CNVR_518	1	61629899	61630409	511	DEL	2	3	0	0	0	0	1	2	0	0
CNVR_519	1	61687642	69750183	8062542	DEL	2	1	0	0	0	0	0	0	1	0
CNVR_520	1	61694703	61731293	36591	DEL	3	2	0	0	1	0	0	1	0	0
CNVR_521	1	61701081	61705247	4167	DEL	2	5	3	0	2	0	0	0	0	0
CNVR_522	1	61703219	61705319	2101	DEL	2	2	0	0	2	0	0	0	0	0
CNVR_523	1	61711758	61714800	3043	DEL	2	1	0	0	1	0	0	0	0	0
CNVR_524	1	61758751	61760045	1295	DEL	3	82	17	2	18	3	16	13	10	3
CNVR_525	1	61855146	61856621	1476	DEL	3	28	12	0	5	1	5	3	2	0
CNVR_526	1	62760501	62768530	8030	DEL	4	8	1	0	0	6	1	0	0	0
CNVR_527	1	63006852	63007608	757	DEL	3	14	6	0	2	0	0	0	4	2
CNVR_528	1	63179018	63180445	1428	DEL	3	9	1	0	1	3	3	0	1	0
CNVR_529	1	63547817	63550783	2967	DEL	3	1	0	0	0	0	1	0	0	0
CNVR_530	1	63658036	63665124	7089	DEL	2	1	0	0	0	1	0	0	0	0
CNVR_531	1	64075251	64081269	6019	DEL	2	8	0	0	3	4	0	1	0	0
CNVR_532	1	64077745	64078369	625	DEL	2	1	0	0	0	0	0	1	0	0
CNVR_533	1	64185898	64187318	1421	DEL	3	4	0	0	3	0	0	1	0	0
CNVR_534	1	64299708	64300750	1043	DEL	3	7	0	0	0	4	0	2	1	0
CNVR_535	1	64694255	64695766	1512	DEL	3	9	3	0	1	0	2	0	3	0
CNVR_536	1	64947501	64951250	3750	DEL	3	25	10	0	4	5	2	1	1	2
CNVR_537	1	64949053	65065903	116851	DEL	2	27	5	0	4	6	7	3	2	0
CNVR_538	1	65404070	65407600	3531	DEL	2	2	0	0	0	1	0	0	1	0
CNVR_539	1	65481850	65484600	2751	DEL	4	45	12	0	7	2	13	8	2	1
CNVR_540	1	65544654	65545208	555	DEL	2	2	0	0	1	0	1	0	0	0
CNVR_541	1	65787778	65791250	3473	DEL	3	144	24	2	24	31	22	22	16	3
CNVR_542	1	65829063	65831936	2874	DEL	2	2	0	0	0	1	0	0	1	0
CNVR_543	1	66131229	66199874	68646	DEL	3	52	18	0	4	13	6	8	2	1
CNVR_544	1	66131281	66132204	924	DEL	2	6	3	0	1	0	0	1	0	1
CNVR_545	1	66548027	66548545	519	DEL	3	12	0	0	3	5	1	2	0	1
CNVR_546	1	66635718	66636923	1206	DEL	3	63	2	0	16	30	6	5	2	2
CNVR_547	1	66727092	66727639	548	DEL	2	1	0	0	0	0	0	1	0	0
CNVR_548	1	66848751	66851000	2250	DEL	2	5	0	0	2	2	0	1	0	0
CNVR_549	1	67042372	67043081	710	DEL	3	32	8	0	6	0	10	2	5	1
CNVR_550	1	67052220	67053012	793	DEL	2	6	0	0	1	0	3	2	0	0
CNVR_551	1	67053664	67054238	575	DEL	2	1	0	0	0	1	0	0	0	0
CNVR_552	1	67137056	67137795	740	DEL	2	6	0	0	1	2	2	0	1	0
CNVR_553	1	67137102	67137639	538	DEL	2	8	0	0	2	4	1	0	1	0
CNVR_554	1	67436993	67437534	542	DEL	3	2	0	0	0	0	1	1	0	0
CNVR_555	1	67589046	67590188	1143	DEL	2	3	3	0	0	0	0	0	0	0
CNVR_556	1	67589101	67593608	4508	DEL	2	3	3	0	0	0	0	0	0	0
CNVR_557	1	67595657	67596637	981	DEL	3	2	2	0	0	0	0	0	0	0
CNVR_558	1	67975049	67975813	765	DEL	2	1	0	0	0	0	1	0	0	0
CNVR_559	1	68163869	68164027	159	DEL	2	2	0	0	0	1	0	0	1	0
CNVR_560	1	68173524	68174237	714	DEL	3	1	1	0	0	0	0	0	0	0
CNVR_561	1	68319558	68320500	943	DEL	4	6	1	0	2	1	0	1	1	0
CNVR_562	1	68517001	68524705	7705	DEL	3	5	5	0	0	0	0	0	0	0
CNVR_563	1	69276210	69295483	19274	DEL	2	4	0	0	2	0	1	0	0	1
CNVR_564	1	69478840	69479848	1009	DEL	3	144	24	1	25	36	22	20	13	3
CNVR_565	1	69960442	69961085	644	DEL	2	7	0	0	1	3	0	2	1	0
CNVR_566	1	70006501	70015500	9000	DEL	3	2	1	0	1	0	0	0	0	0
CNVR_567	1	70039656	70040451	796	DEL	3	51	8	0	12	15	7	5	1	3
CNVR_568	1	70039828	70040671	844	DEL	2	4	0	0	4	0	0	0	0	0
CNVR_569	1	70062313	70063030	718	DEL	2	2	2	0	0	0	0	0	0	0
CNVR_570	1	70062523	70062964	442	DEL	2	1	1	0	0	0	0	0	0	0
CNVR_571	1	70419601	70424745	5145	DEL	3	1	0	0	0	0	0	0	0	1
CNVR_572	1	70694101	70695500	1400	DEL	4	7	3	0	0	0	1	0	0	3
CNVR_573	1	70838876	70839688	813	DEL	3	110	20	1	22	24	19	15	6	3
CNVR_574	1	70839026	70839596	571	DEL	2	17	0	0	0	11	0	4	2	0
CNVR_575	1	70952571	72650960	1698390	DEL	2	4	0	0	0	2	0	2	0	0
CNVR_576	1	70957774	76143063	5185290	DEL	2	1	0	0	1	0	0	0	0	0
CNVR_577	1	70964532	71013322	48791	DEL	2	4	0	0	1	0	1	1	0	1
CNVR_578	1	71193363	71194068	706	DEL	2	28	3	0	1	6	2	7	9	0
CNVR_579	1	71193524	71194018	495	DEL	2	2	0	0	0	0	0	1	1	0
CNVR_580	1	71215382	71215683	302	DEL	2	1	0	0	0	1	0	0	0	0
CNVR_581	1	71216728	71216843	116	DEL	2	1	0	0	0	1	0	0	0	0
CNVR_582	1	71922001	71923500	1500	DEL	3	1	0	0	0	0	0	1	0	0
CNVR_583	1	72032946	72035932	2987	DEL	3	5	3	0	1	0	0	0	0	1
CNVR_584	1	72250453	72251400	948	DEL	4	23	6	0	9	2	1	3	2	0
CNVR_585	1	72796893	72797344	452	DEL	2	4	0	0	1	1	1	0	1	0
CNVR_586	1	72891403	72892606	1204	DEL	4	17	8	0	2	1	5	1	0	0
CNVR_587	1	74885752	74892786	7035	DEL	3	6	2	0	1	0	1	0	2	0
CNVR_588	1	74915967	74917578	1612	DEL	4	31	10	0	5	0	2	1	12	1
CNVR_589	1	75178040	75179306	1267	DEL	3	1	0	0	0	0	1	0	0	0
CNVR_590	1	75963063	75964074	1012	DEL	2	1	0	0	0	0	0	0	0	1
CNVR_591	1	75980001	76053132	73132	DEL	2	2	0	0	1	0	0	1	0	0
CNVR_592	1	76001122	76002500	1379	DEL	3	5	1	0	3	0	0	1	0	0
CNVR_593	1	76047001	76054028	7028	DEL	3	31	8	0	1	10	5	7	0	0
CNVR_594	1	76054716	76055653	938	DEL	3	23	8	0	1	5	4	5	0	0
CNVR_595	1	76067922	76068291	370	DEL	2	1	0	0	0	1	0	0	0	0
CNVR_596	1	76094701	76098300	3600	DUP	2	21	6	0	7	0	5	3	0	0
CNVR_597	1	76133088	76133241	154	DEL	2	1	0	0	0	1	0	0	0	0
CNVR_598	1	76457406	76458727	1322	DEL	2	1	0	0	0	0	0	0	1	0
CNVR_599	1	76627324	76953485	326162	DEL	2	10	1	0	0	3	1	0	5	0
CNVR_600	1	76754294	76761900	7607	DUP	2	1	0	0	0	0	0	0	0	1
CNVR_601	1	76813987	76814647	661	DEL	2	1	0	0	0	0	0	0	0	1
CNVR_602	1	76952251	76955100	2850	DEL	4	25	3	0	7	6	1	4	3	1
CNVR_603	1	76952511	76953338	828	DEL	2	1	0	0	0	0	1	0	0	0
CNVR_604	1	77035332	77037451	2120	DEL	3	14	2	0	3	2	3	3	1	0
CNVR_605	1	77082292	77083192	901	DEL	3	13	1	0	0	5	2	0	5	0
CNVR_606	1	77119178	77120290	1113	DEL	3	11	2	1	4	1	0	3	0	0
CNVR_607	1	77230438	77231010	573	DEL	3	47	9	0	7	8	11	5	7	0
CNVR_608	1	77230498	77230961	464	DEL	2	7	1	0	0	1	1	1	3	0
CNVR_609	1	77246285	77247135	851	DEL	2	2	0	0	0	1	0	0	1	0
CNVR_610	1	77447367	77448939	1573	DEL	2	15	1	0	4	1	4	3	0	2
CNVR_611	1	77499848	77500220	373	DEL	2	12	1	0	0	5	1	2	3	0
CNVR_612	1	77795186	77795633	448	DEL	2	2	0	0	0	1	0	0	1	0
CNVR_613	1	77929846	77930930	1085	DEL	2	7	2	0	5	0	0	0	0	0
CNVR_614	1	77958501	77961300	2800	DEL	3	5	0	0	5	0	0	0	0	0
CNVR_615	1	78043616	78044511	896	DEL	2	1	0	0	0	1	0	0	0	0
CNVR_616	1	78180196	78180866	671	DEL	3	1	0	0	0	0	0	0	0	1
CNVR_617	1	78291745	78292666	922	DEL	2	2	2	0	0	0	0	0	0	0
CNVR_618	1	78355001	78381861	26861	DUP	2	1	0	0	0	0	0	0	1	0
CNVR_619	1	78438672	78475429	36758	DEL	2	1	0	0	0	0	1	0	0	0
CNVR_620	1	78498556	78500854	2299	DEL	3	3	0	0	0	0	3	0	0	0
CNVR_621	1	78565580	78566183	604	DEL	2	2	2	0	0	0	0	0	0	0
CNVR_622	1	78586036	78690227	104192	DEL	3	39	4	0	13	6	7	4	4	1
CNVR_623	1	78608171	78608976	806	DEL	3	35	2	0	10	5	8	6	3	1
CNVR_624	1	78775900	78777264	1365	DEL	3	11	0	0	2	8	0	1	0	0
CNVR_625	1	79093558	79094262	705	DEL	2	1	0	0	1	0	0	0	0	0
CNVR_626	1	79396581	79397750	1170	DEL	3	6	0	0	0	4	0	1	1	0
CNVR_627	1	80238301	80241900	3600	DEL	4	63	15	0	12	13	15	6	1	1
CNVR_628	1	80701470	80702314	845	DEL	3	14	0	0	3	1	0	5	5	0
CNVR_629	1	80984683	80990950	6268	DUP	2	1	0	0	0	0	0	0	1	0
CNVR_630	1	81067593	81068563	971	DEL	2	1	0	0	0	0	0	0	1	0
CNVR_631	1	81092018	81102143	10126	DEL	2	2	1	0	0	1	0	0	0	0
CNVR_632	1	81309509	81311463	1955	DEL	2	1	0	0	0	0	1	0	0	0
CNVR_633	1	81677401	81684750	7350	DUP	2	6	0	0	5	0	0	0	0	1
CNVR_634	1	81851100	81941570	90471	DEL	2	1	0	0	0	1	0	0	0	0
CNVR_635	1	82065601	82067532	1932	DEL	3	3	1	0	0	0	0	2	0	0
CNVR_636	1	82549628	82552031	2404	DEL	2	1	0	0	0	0	1	0	0	0
CNVR_637	1	82666001	82669808	3808	DEL	3	19	4	0	1	2	5	6	0	1
CNVR_638	1	82672784	82673985	1202	DEL	2	2	0	0	2	0	0	0	0	0
CNVR_639	1	82779216	82781161	1946	DEL	4	2	0	0	2	0	0	0	0	0
CNVR_640	1	82887652	82888638	987	DEL	3	11	1	0	1	3	4	2	0	0
CNVR_641	1	83214601	83238900	24300	DEL	3	24	4	0	7	1	6	5	0	1
CNVR_642	1	83588025	83589844	1820	DEL	2	1	0	0	0	0	0	1	0	0
CNVR_643	1	83730960	83731566	607	DEL	2	3	0	0	1	1	1	0	0	0
CNVR_644	1	84247201	84248100	900	DEL	2	1	0	0	0	0	1	0	0	0
CNVR_645	1	84247728	84307683	59956	DEL	2	5	1	0	1	1	0	2	0	0
CNVR_646	1	84426001	84442000	16000	DEL	2	1	0	0	0	1	0	0	0	0
CNVR_647	1	84903410	84904000	591	DEL	3	24	6	0	2	2	8	2	4	0
CNVR_648	1	84908751	84909797	1047	DEL	3	4	0	0	2	0	0	2	0	0
CNVR_649	1	85054680	85055320	641	DEL	2	2	0	0	0	0	0	0	2	0
CNVR_650	1	85198078	85198702	625	DUP	2	3	3	0	0	0	0	0	0	0
CNVR_651	1	85755480	85769818	14339	DEL	3	6	1	0	0	2	0	2	1	0
CNVR_652	1	86811991	88582738	1770748	DEL	3	18	1	0	2	6	5	1	2	1
CNVR_653	1	87417210	87418151	942	DEL	2	2	0	0	0	0	1	0	0	1
CNVR_654	1	87505527	87506290	764	DEL	3	91	20	0	23	13	18	10	5	2
CNVR_655	1	87505680	87506290	611	DEL	2	23	1	0	1	11	0	4	6	0
CNVR_656	1	87881780	87882576	797	DEL	2	4	1	0	0	0	0	2	1	0
CNVR_657	1	88040953	88041644	692	DEL	2	3	1	0	0	0	1	1	0	0
CNVR_658	1	88041120	88041537	418	DEL	2	5	0	0	0	5	0	0	0	0
CNVR_659	1	88174871	88175507	637	DEL	2	1	0	0	0	0	0	1	0	0
CNVR_660	1	88352940	88353437	498	DEL	2	1	0	0	0	0	0	0	1	0
CNVR_661	1	88615191	88616000	810	DEL	3	2	0	0	2	0	0	0	0	0
CNVR_662	1	88710965	88712436	1472	DEL	3	33	1	0	1	22	9	0	0	0
CNVR_663	1	88928114	88950273	22160	DEL	2	2	0	0	0	2	0	0	0	0
CNVR_664	1	89029915	89030548	634	DEL	2	6	0	0	2	0	0	4	0	0
CNVR_665	1	89152291	89153062	772	DEL	2	1	0	0	0	1	0	0	0	0
CNVR_666	1	89228197	89228426	230	DEL	2	1	0	0	0	0	1	0	0	0
CNVR_667	1	89274149	89275185	1037	DEL	3	91	15	0	23	16	18	13	3	3
CNVR_668	1	89307839	89308232	394	DUP	2	6	3	0	1	0	2	0	0	0
CNVR_669	1	89322863	89323548	686	DEL	3	19	4	0	6	1	3	5	0	0
CNVR_670	1	89626219	89627015	797	DEL	3	25	10	0	1	0	3	4	6	1
CNVR_671	1	89990037	89991050	1014	DEL	3	89	14	0	16	15	16	14	12	2
CNVR_672	1	90583263	90583543	281	DEL	2	1	0	0	0	0	0	1	0	0
CNVR_673	1	90790535	90791380	846	DEL	3	1	1	0	0	0	0	0	0	0
CNVR_674	1	90970874	90972500	1627	DEL	3	2	0	0	0	1	0	1	0	0
CNVR_675	1	91172334	91217629	45296	DEL	3	1	0	0	0	0	0	1	0	0
CNVR_676	1	91173751	91175943	2193	DEL	2	1	0	0	0	1	0	0	0	0
CNVR_677	1	91204840	91207189	2350	DEL	2	1	0	0	1	0	0	0	0	0
CNVR_678	1	91281768	91284750	2983	DEL	4	23	4	0	11	1	1	4	0	2
CNVR_679	1	91345751	91398750	53000	DEL	4	9	0	0	3	0	0	5	0	1
CNVR_680	1	91480040	91480546	507	DEL	2	3	1	0	0	1	1	0	0	0
CNVR_681	1	91513538	91525750	12213	DEL	3	65	16	0	12	6	16	10	2	3
CNVR_682	1	91600958	91601348	391	DEL	2	1	0	0	0	0	0	0	0	1
CNVR_683	1	91610904	91611826	923	DEL	3	23	5	0	6	6	5	0	0	1
CNVR_684	1	91665560	91666293	734	DEL	3	104	17	0	20	25	20	12	7	3
CNVR_685	1	91844375	91850400	6026	DEL	4	44	15	0	11	5	10	1	0	2
CNVR_686	1	91844450	91847837	3388	DEL	2	1	0	0	0	0	0	1	0	0
CNVR_687	1	92018976	92020193	1218	DEL	3	11	5	0	2	0	3	0	0	1
CNVR_688	1	92032564	92032967	404	DEL	2	5	1	0	0	1	0	2	1	0
CNVR_689	1	92175901	92178750	2850	DEL	4	25	5	0	6	4	2	6	1	1
CNVR_690	1	92321250	92321600	351	DEL	2	1	0	0	0	1	0	0	0	0
CNVR_691	1	92405557	92406618	1062	DEL	2	7	2	0	3	0	2	0	0	0
CNVR_692	1	92585464	92589605	4142	DEL	3	26	4	3	6	8	2	0	3	0
CNVR_693	1	92699495	92700243	749	DEL	3	15	7	0	4	0	4	0	0	0
CNVR_694	1	92852281	92853075	795	DEL	3	133	22	0	25	31	21	20	11	3
CNVR_695	1	92878823	92879337	515	DEL	2	1	0	0	0	0	0	1	0	0
CNVR_696	1	93006501	93023750	17250	DEL	3	71	3	3	2	33	3	14	13	0
CNVR_697	1	93011250	93012961	1712	DEL	2	1	0	1	0	0	0	0	0	0
CNVR_698	1	93121631	93127101	5471	DEL	4	2	2	0	0	0	0	0	0	0
CNVR_699	1	93123301	93149313	26013	DEL	3	3	1	0	0	0	2	0	0	0
CNVR_700	1	93264205	93265117	913	DEL	2	1	1	0	0	0	0	0	0	0
CNVR_701	1	93383609	93384549	941	DEL	2	1	0	0	1	0	0	0	0	0
CNVR_702	1	93525318	93525999	682	DEL	2	16	2	0	1	5	2	4	2	0
CNVR_703	1	93740034	93741381	1348	DEL	2	14	0	0	5	4	3	0	1	1
CNVR_704	1	94105141	94106269	1129	DEL	2	4	0	0	3	0	0	0	0	1
CNVR_705	1	94266031	94266738	708	DEL	2	7	2	0	4	0	0	0	0	1
CNVR_706	1	94408872	94410132	1261	DEL	3	1	0	0	0	0	0	1	0	0
CNVR_707	1	94511197	94511327	131	DEL	2	1	0	0	0	1	0	0	0	0
CNVR_708	1	94550127	94586636	36510	DEL	2	2	0	0	0	2	0	0	0	0
CNVR_709	1	94569219	94570500	1282	DEL	3	3	1	0	0	0	2	0	0	0
CNVR_710	1	94586907	94587124	218	DEL	2	2	0	0	0	1	1	0	0	0
CNVR_711	1	94730780	94731323	544	DEL	2	1	0	0	0	0	1	0	0	0
CNVR_712	1	94798729	94799610	882	DEL	3	11	0	0	7	0	4	0	0	0
CNVR_713	1	94828282	94829315	1034	DEL	2	1	0	0	0	0	1	0	0	0
CNVR_714	1	95147416	95149259	1844	DEL	3	12	1	0	4	1	3	2	0	1
CNVR_715	1	95235964	95244583	8620	DEL	4	1	1	0	0	0	0	0	0	0
CNVR_716	1	95272836	95273484	649	DEL	3	80	17	0	15	13	17	7	10	1
CNVR_717	1	95433329	95433901	573	DEL	2	3	1	0	1	0	0	1	0	0
CNVR_718	1	95433350	95433778	429	DEL	2	4	1	0	0	0	0	1	2	0
CNVR_719	1	95476939	95480439	3501	DEL	2	1	0	0	0	0	1	0	0	0
CNVR_720	1	95477013	95490250	13238	DEL	2	2	0	0	0	0	2	0	0	0
CNVR_721	1	95676483	95677263	781	DEL	3	25	9	0	2	5	2	4	3	0
CNVR_722	1	96354183	96355064	882	DEL	4	26	10	0	11	0	2	3	0	0
CNVR_723	1	96541442	96542097	656	DEL	2	4	1	0	0	0	3	0	0	0
CNVR_724	1	96641501	96644065	2565	DEL	4	75	15	0	7	29	6	15	1	2
CNVR_725	1	97279133	97282200	3068	DEL	4	107	21	1	23	25	13	15	6	3
CNVR_726	1	97518501	97546000	27500	DEL	3	75	19	0	23	7	13	9	1	3
CNVR_727	1	98122903	98123817	915	DEL	2	1	0	0	1	0	0	0	0	0
CNVR_728	1	98480251	98488250	8000	DEL	3	15	1	0	0	4	1	3	6	0
CNVR_729	1	99571874	99572579	706	DEL	3	115	17	1	20	25	20	17	12	3
CNVR_730	1	99571967	99572579	613	DEL	3	98	13	1	15	23	20	15	8	3
CNVR_731	1	99926103	99926576	474	DEL	3	11	0	0	1	5	1	0	3	1
CNVR_732	1	99970751	99972394	1644	DEL	4	5	0	0	4	0	0	0	0	1
CNVR_733	1	99986251	99990574	4324	DEL	3	33	9	0	14	4	3	1	1	1
CNVR_734	1	100082369	100102030	19662	DEL	2	2	0	0	0	2	0	0	0	0
CNVR_735	1	100593160	100594621	1462	DEL	2	1	0	0	1	0	0	0	0	0
CNVR_736	1	100885420	100886346	927	DEL	3	20	0	2	10	1	0	1	6	0
CNVR_737	1	101021876	101023507	1632	DEL	3	75	12	1	18	17	17	7	1	2
CNVR_738	1	101135649	101136528	880	DEL	4	20	4	0	8	1	3	3	0	1
CNVR_739	1	101144838	101145900	1063	DEL	4	58	17	0	15	4	17	3	1	1
CNVR_740	1	101301588	101301839	252	DEL	2	1	0	0	0	1	0	0	0	0
CNVR_741	1	101333990	101335761	1772	DEL	2	48	11	0	17	2	9	5	1	3
CNVR_742	1	101455705	101456700	996	DEL	3	3	1	0	0	0	2	0	0	0
CNVR_743	1	101465862	101467966	2105	DEL	3	24	4	0	1	7	8	1	2	1
CNVR_744	1	101904767	101907367	2601	DUP	2	1	0	0	0	1	0	0	0	0
CNVR_745	1	101931833	101932750	918	DEL	3	96	16	0	22	27	13	12	4	2
CNVR_746	1	101939811	101941509	1699	DEL	3	129	25	0	24	30	25	16	6	3
CNVR_747	1	101999395	102018010	18616	DEL	2	2	0	0	0	2	0	0	0	0
CNVR_748	1	102030813	102032530	1718	DEL	4	117	24	0	25	28	17	11	9	3
CNVR_749	1	102489490	102519629	30140	DEL	2	1	0	0	1	0	0	0	0	0
CNVR_750	1	102563501	102565859	2359	DEL	4	12	0	0	4	3	0	4	1	0
CNVR_751	1	102633897	102634703	807	DEL	2	1	0	0	0	0	0	1	0	0
CNVR_752	1	102733468	102737000	3533	DUP	2	2	1	0	1	0	0	0	0	0
CNVR_753	1	103095995	103096555	561	DEL	3	14	0	0	5	0	4	3	1	1
CNVR_754	1	103096021	103096468	448	DEL	3	22	0	1	7	3	7	1	2	1
CNVR_755	1	103104956	103106235	1280	DEL	3	5	0	0	5	0	0	0	0	0
CNVR_756	1	103110347	103112588	2242	DEL	3	80	5	2	19	18	15	10	9	2
CNVR_757	1	103185330	103185847	518	DEL	3	2	2	0	0	0	0	0	0	0
CNVR_758	1	103208701	103244500	35800	DEL	3	3	2	0	0	1	0	0	0	0
CNVR_759	1	103364501	103368000	3500	DEL	4	28	11	0	10	2	1	2	1	1
CNVR_760	1	103368376	103373627	5252	DEL	3	3	0	0	3	0	0	0	0	0
CNVR_761	1	103375957	103376125	169	DEL	2	1	0	0	0	1	0	0	0	0
CNVR_762	1	103404910	103405217	308	DEL	2	4	1	0	0	1	0	1	1	0
CNVR_763	1	103553704	103553856	153	DEL	2	1	0	0	0	1	0	0	0	0
CNVR_764	1	103576480	103578900	2421	DEL	4	95	11	1	22	21	17	12	8	3
CNVR_765	1	103584919	103588469	3551	DEL	4	112	12	0	22	33	17	13	12	3
CNVR_766	1	103779050	103779361	312	DEL	2	1	0	0	0	1	0	0	0	0
CNVR_767	1	103804379	103809661	5283	DEL	2	6	2	0	1	1	1	0	0	1
CNVR_768	1	103821684	103823891	2208	DEL	3	1	0	0	0	0	0	1	0	0
CNVR_769	1	103837281	103837921	641	DEL	2	1	0	0	0	0	1	0	0	0
CNVR_770	1	103837489	103837937	449	DEL	2	6	1	0	0	3	0	2	0	0
CNVR_771	1	103840721	103841368	648	DEL	2	1	0	0	0	0	1	0	0	0
CNVR_772	1	104001616	104002971	1356	DEL	3	84	19	0	14	17	15	16	1	2
CNVR_773	1	104018961	104019660	700	DEL	3	5	0	0	1	0	2	0	1	1
CNVR_774	1	104108622	104111118	2497	DEL	3	25	8	0	2	0	9	4	0	2
CNVR_775	1	104198401	104201000	2600	DEL	3	28	10	0	7	0	6	3	0	2
CNVR_776	1	104422203	104424014	1812	DEL	3	1	1	0	0	0	0	0	0	0
CNVR_777	1	104478172	104479298	1127	DEL	3	6	2	0	0	0	0	4	0	0
CNVR_778	1	104478855	104494015	15161	DEL	3	18	2	0	10	0	0	4	0	2
CNVR_779	1	104499001	104501783	2783	DEL	2	1	0	0	1	0	0	0	0	0
CNVR_780	1	104750682	104751297	616	DEL	2	2	0	0	1	1	0	0	0	0
CNVR_781	1	104781751	104785750	4000	DEL	2	1	0	0	0	0	0	0	1	0
CNVR_782	1	104915310	104916181	872	DEL	3	64	12	0	10	16	12	9	3	2
CNVR_783	1	104945249	104946701	1453	DEL	4	77	14	0	20	14	15	8	4	2
CNVR_784	1	105081900	105082671	772	DEL	2	21	4	0	5	5	2	4	1	0
CNVR_785	1	105087751	105090766	3016	DEL	3	14	3	0	1	7	2	1	0	0
CNVR_786	1	105106501	105113100	6600	DEL	4	8	1	0	3	0	3	0	0	1
CNVR_787	1	105128043	105139200	11158	DEL	4	8	1	0	3	0	3	0	0	1
CNVR_788	1	105542751	105574250	31500	DEL	4	13	2	0	0	0	0	11	0	0
CNVR_789	1	105580203	106004444	424242	DEL	2	1	0	0	0	0	1	0	0	0
CNVR_790	1	105644771	105645278	508	DEL	2	1	0	0	0	0	1	0	0	0
CNVR_791	1	105890312	105892494	2183	DEL	3	22	4	0	9	0	3	4	1	1
CNVR_792	1	105992472	105992767	296	DEL	2	1	0	0	0	1	0	0	0	0
CNVR_793	1	105995170	105996989	1820	DEL	4	26	4	0	8	1	7	4	0	2
CNVR_794	1	106017093	106029602	12510	DEL	2	4	0	0	3	0	0	1	0	0
CNVR_795	1	107320192	107320801	610	DEL	2	27	6	0	4	5	4	7	1	0
CNVR_796	1	107320234	107320855	622	DEL	2	7	1	0	0	1	3	1	1	0
CNVR_797	1	107320305	107320945	641	DEL	2	2	1	0	0	0	1	0	0	0
CNVR_798	1	107458201	107461256	3056	DEL	4	2	0	0	2	0	0	0	0	0
CNVR_799	1	107460858	107462135	1278	DEL	2	84	23	0	23	7	18	7	3	3
CNVR_800	1	107529392	107530344	953	DEL	4	143	25	1	25	33	23	23	10	3
CNVR_801	1	107532293	107570700	38408	DEL	2	8	0	0	4	0	3	0	0	1
CNVR_802	1	107788983	107801100	12118	DEL	3	1	0	0	0	0	1	0	0	0
CNVR_803	1	107870251	107871500	1250	DEL	2	2	1	0	0	0	0	1	0	0
CNVR_804	1	107968929	107970230	1302	DEL	3	54	11	0	16	5	9	8	4	1
CNVR_805	1	108027687	108028349	663	DEL	2	1	0	0	0	0	0	1	0	0
CNVR_806	1	108365101	108369924	4824	DEL	3	6	3	0	1	0	2	0	0	0
CNVR_807	1	108376640	108425319	48680	DEL	2	1	1	0	0	0	0	0	0	0
CNVR_808	1	108481511	108482750	1240	DEL	2	3	2	0	0	0	1	0	0	0
CNVR_809	1	108598162	108598774	613	DEL	2	1	0	0	0	0	0	1	0	0
CNVR_810	1	108732966	108733945	980	DEL	3	43	6	0	4	27	3	1	1	1
CNVR_811	1	108784580	108786101	1522	DEL	3	31	8	0	13	4	2	3	1	0
CNVR_812	1	108895977	108915942	19966	DEL	2	1	0	0	0	0	0	0	1	0
CNVR_813	1	109047251	109051500	4250	DEL	4	4	3	0	0	0	1	0	0	0
CNVR_814	1	110020201	110027400	7200	DEL	3	5	2	0	0	0	2	0	0	1
CNVR_815	1	110145093	110150110	5018	DEL	3	11	0	0	5	0	3	1	1	1
CNVR_816	1	110179797	110180553	757	DEL	2	10	1	0	4	2	2	1	0	0
CNVR_817	1	110352321	110353165	845	DEL	2	1	0	0	1	0	0	0	0	0
CNVR_818	1	110669353	110670732	1380	DEL	2	1	0	0	0	0	0	0	0	1
CNVR_819	1	110671115	110672451	1337	DEL	2	1	0	0	0	0	1	0	0	0
CNVR_820	1	110746751	110752800	6050	DUP	3	23	8	0	3	1	6	5	0	0
CNVR_821	1	110861401	110862600	1200	DEL	2	4	2	0	1	0	1	0	0	0
CNVR_822	1	110997928	110999193	1266	DEL	2	8	1	0	2	4	0	0	0	1
CNVR_823	1	111001184	111005400	4217	DUP	2	1	0	0	1	0	0	0	0	0
CNVR_824	1	111208822	111209336	515	DEL	2	1	1	0	0	0	0	0	0	0
CNVR_825	1	111293145	111293791	647	DEL	3	19	6	0	6	3	2	0	2	0
CNVR_826	1	111350092	111351210	1119	DEL	3	13	1	0	6	0	6	0	0	0
CNVR_827	1	111537780	111538384	605	DEL	2	2	2	0	0	0	0	0	0	0
CNVR_828	1	111537918	111538352	435	DEL	2	9	2	0	0	2	1	0	3	1
CNVR_829	1	111633834	111634647	814	DEL	2	9	0	0	1	3	2	1	2	0
CNVR_830	1	111633922	111634646	725	DEL	2	2	0	0	0	1	1	0	0	0
CNVR_831	1	111657713	111658815	1103	DEL	2	3	1	0	0	0	0	0	0	2
CNVR_832	1	111666208	111666956	749	DEL	2	2	0	0	2	0	0	0	0	0
CNVR_833	1	111666407	111666957	551	DEL	2	27	3	1	3	5	6	6	2	1
CNVR_834	1	112417426	112418700	1275	DEL	3	5	1	0	3	0	1	0	0	0
CNVR_835	1	112476238	112477500	1263	DEL	3	2	0	0	0	0	0	1	1	0
CNVR_836	1	112591827	112593635	1809	DEL	2	4	0	0	0	2	2	0	0	0
CNVR_837	1	112617901	112619895	1995	DEL	3	12	4	0	4	1	2	0	0	1
CNVR_838	1	112656601	112658250	1650	DEL	3	18	4	0	6	2	3	2	0	1
CNVR_839	1	112657657	112669333	11677	DEL	2	18	3	0	6	1	5	1	0	2
CNVR_840	1	112929721	112930824	1104	DEL	3	4	0	0	0	2	2	0	0	0
CNVR_841	1	112934906	112936978	2073	DEL	3	3	2	0	0	0	1	0	0	0
CNVR_842	1	113183346	113185030	1685	DEL	2	5	3	0	1	0	1	0	0	0
CNVR_843	1	113216701	113248500	31800	DUP	2	69	12	2	20	6	11	14	2	2
CNVR_844	1	113454345	113455516	1172	DEL	3	6	1	0	1	3	0	1	0	0
CNVR_845	1	113473765	118839681	5365917	DEL	2	6	1	0	1	0	3	0	1	0
CNVR_846	1	113636319	113638173	1855	DEL	2	16	3	0	4	0	3	4	0	2
CNVR_847	1	113655794	113656437	644	DEL	2	1	0	0	0	0	0	0	0	1
CNVR_848	1	113755602	113767509	11908	DEL	2	1	0	0	1	0	0	0	0	0
CNVR_849	1	113775301	113783400	8100	DEL	2	1	0	0	1	0	0	0	0	0
CNVR_850	1	114082038	114083430	1393	DEL	3	26	8	0	4	3	7	3	0	1
CNVR_851	1	114869296	114869723	428	DEL	2	1	0	0	1	0	0	0	0	0
CNVR_852	1	115032527	115032772	246	DEL	2	1	0	0	0	1	0	0	0	0
CNVR_853	1	115097130	115098195	1066	DEL	3	49	15	0	18	2	8	5	0	1
CNVR_854	1	115101501	115103812	2312	DEL	3	60	10	0	20	12	7	6	4	1
CNVR_855	1	115156201	115161500	5300	DEL	3	8	4	0	0	0	1	2	0	1
CNVR_856	1	115174170	115175750	1581	DEL	3	5	0	0	1	1	1	1	1	0
CNVR_857	1	115233909	115238933	5025	DEL	2	2	0	0	0	1	0	1	0	0
CNVR_858	1	115251057	115252500	1444	DEL	3	20	8	0	1	3	2	6	0	0
CNVR_859	1	115300723	115312500	11778	DUP	2	1	1	0	0	0	0	0	0	0
CNVR_860	1	115303024	115303210	187	DEL	2	1	0	0	0	1	0	0	0	0
CNVR_861	1	115408286	115408959	674	DEL	2	1	0	0	0	0	0	0	0	1
CNVR_862	1	115547242	115550720	3479	DEL	2	1	0	0	0	0	0	0	1	0
CNVR_863	1	116060401	116064622	4222	DUP	2	1	0	0	0	0	1	0	0	0
CNVR_864	1	116081251	116083000	1750	DEL	3	54	14	0	16	3	14	4	0	3
CNVR_865	1	116410461	116412594	2134	DEL	3	7	0	0	3	0	3	0	1	0
CNVR_866	1	116481631	116481880	250	DEL	2	5	0	0	0	4	0	1	0	0
CNVR_867	1	116551260	117124278	573019	DEL	2	2	1	0	0	0	1	0	0	0
CNVR_868	1	116584971	116586527	1557	DEL	3	3	0	0	0	3	0	0	0	0
CNVR_869	1	116868964	116869658	695	DEL	3	9	0	0	1	0	6	2	0	0
CNVR_870	1	117104399	117107267	2869	DEL	2	1	0	0	0	0	0	1	0	0
CNVR_871	1	117749401	117750163	763	DEL	3	5	0	0	2	1	0	0	1	1
CNVR_872	1	118429501	118438835	9335	DEL	2	1	1	0	0	0	0	0	0	0
CNVR_873	1	118585203	118586085	883	DEL	3	7	0	0	6	0	0	0	0	1
CNVR_874	1	118720001	118722345	2345	DEL	3	9	0	0	0	9	0	0	0	0
CNVR_875	1	119091748	119096213	4466	DEL	2	1	1	0	0	0	0	0	0	0
CNVR_876	1	119968321	119969571	1251	DEL	2	2	1	0	0	0	0	0	0	1
CNVR_877	1	120110567	120111373	807	DEL	3	49	19	0	8	6	10	1	2	3
CNVR_878	1	120334905	120337377	2473	DEL	2	1	1	0	0	0	0	0	0	0
CNVR_879	1	120351001	120352145	1145	DEL	4	8	1	0	2	1	0	4	0	0
CNVR_880	1	120742981	120746237	3257	DUP	2	16	1	0	1	6	1	5	1	1
CNVR_881	1	120743285	120747900	4616	DEL	3	5	1	0	2	0	1	0	0	1
CNVR_882	1	120896487	120898494	2008	DEL	2	2	0	0	0	2	0	0	0	0
CNVR_883	1	121055209	121056211	1003	DEL	2	1	0	0	1	0	0	0	0	0
CNVR_884	1	121379748	121381017	1270	DEL	3	61	18	1	10	10	17	2	1	2
CNVR_885	1	121553834	121555116	1283	DEL	3	41	14	0	13	4	7	0	1	2
CNVR_886	1	122246595	122246879	285	DEL	2	1	0	0	0	1	0	0	0	0
CNVR_887	1	122272760	122273585	826	DEL	3	14	4	0	5	0	1	3	1	0
CNVR_888	1	122742501	122750500	8000	DEL	4	59	5	1	9	15	6	11	11	1
CNVR_889	1	122817501	122820352	2852	DEL	3	28	6	0	10	2	6	4	0	0
CNVR_890	1	122831610	122832510	901	DEL	2	2	1	0	0	1	0	0	0	0
CNVR_891	1	122903728	122904658	931	DEL	4	67	16	0	12	10	16	8	4	1
CNVR_892	1	122945401	122948400	3000	DEL	2	1	0	0	1	0	0	0	0	0
CNVR_893	1	123009245	123013358	4114	DEL	3	63	16	1	16	6	15	3	3	3
CNVR_894	1	123069751	123079352	9602	DEL	4	72	18	1	12	15	14	7	3	2
CNVR_895	1	123169923	123172250	2328	DEL	2	14	7	0	3	0	3	1	0	0
CNVR_896	1	123171951	123172750	800	DEL	2	1	0	0	0	0	0	1	0	0
CNVR_897	1	123285569	123286428	860	DEL	3	9	1	0	2	0	5	0	1	0
CNVR_898	1	123487201	123488700	1500	DEL	3	7	2	0	1	1	0	2	1	0
CNVR_899	1	123649034	123649952	919	DEL	3	45	14	0	6	8	8	4	3	2
CNVR_900	1	123985579	123985840	262	DEL	2	2	0	0	0	2	0	0	0	0
CNVR_901	1	124128451	124141840	13390	DEL	2	1	1	0	0	0	0	0	0	0
CNVR_902	1	124137628	124140803	3176	DEL	3	135	24	0	25	35	22	19	7	3
CNVR_903	1	124141751	124151675	9925	DEL	4	150	23	1	25	41	22	22	13	3
CNVR_904	1	124382001	124422000	40000	DEL	4	21	0	0	0	19	2	0	0	0
CNVR_905	1	124393148	124783053	389906	DEL	2	26	4	1	7	9	1	2	2	0
CNVR_906	1	124509341	124510259	919	DEL	3	12	4	0	0	3	4	1	0	0
CNVR_907	1	124585236	124616232	30997	DEL	2	1	0	0	0	0	1	0	0	0
CNVR_908	1	124619293	124620384	1092	DEL	3	5	0	0	2	0	3	0	0	0
CNVR_909	1	124680070	124680741	672	DEL	2	3	0	0	0	0	2	1	0	0
CNVR_910	1	124999344	125001285	1942	DEL	3	7	2	0	0	3	0	1	1	0
CNVR_911	1	125348292	125348975	684	DEL	2	1	0	0	0	0	1	0	0	0
CNVR_912	1	125356528	125357867	1340	DEL	2	1	0	0	0	0	0	1	0	0
CNVR_913	1	125496501	125499500	3000	DEL	3	16	0	0	0	10	0	3	3	0
CNVR_914	1	125817732	125818617	886	DEL	3	2	0	0	0	1	1	0	0	0
CNVR_915	1	125918086	125933937	15852	DEL	2	1	0	0	1	0	0	0	0	0
CNVR_916	1	126217320	126218627	1308	DEL	2	1	0	0	0	0	0	0	1	0
CNVR_917	1	126255791	126256190	400	DEL	2	3	0	0	0	0	1	0	2	0
CNVR_918	1	126342185	126343100	916	DEL	3	27	9	1	5	3	4	3	1	1
CNVR_919	1	126345001	126350418	5418	DEL	3	6	1	0	1	0	3	0	0	1
CNVR_920	1	127525881	127596289	70409	DEL	2	1	1	0	0	0	0	0	0	0
CNVR_921	1	127576758	127577301	544	DEL	2	1	0	0	0	0	0	1	0	0
CNVR_922	1	127846940	127847239	300	DEL	2	1	0	0	0	1	0	0	0	0
CNVR_923	1	128051347	128060375	9029	DEL	2	2	0	0	0	0	0	1	0	1
CNVR_924	1	128299885	128300466	582	DEL	2	1	0	0	0	0	0	1	0	0
CNVR_925	1	128674960	128676610	1651	DEL	2	1	0	0	0	0	1	0	0	0
CNVR_926	1	128763454	128771000	7547	DEL	4	6	2	0	1	0	2	1	0	0
CNVR_927	1	128933954	128944841	10888	DEL	2	4	2	0	0	2	0	0	0	0
CNVR_928	1	129113567	129114170	604	DEL	2	1	0	0	0	0	0	1	0	0
CNVR_929	1	129139848	129140282	435	DEL	2	1	0	0	0	0	1	0	0	0
CNVR_930	1	129156277	129157905	1629	DEL	3	52	12	0	7	11	11	5	3	3
CNVR_931	1	129229073	129229658	586	DEL	2	3	2	0	0	0	0	1	0	0
CNVR_932	1	129333708	129334729	1022	DEL	3	60	23	0	8	3	14	8	3	1
CNVR_933	1	129857501	129858577	1077	DEL	3	2	0	0	2	0	0	0	0	0
CNVR_934	1	130214543	130214889	347	DEL	2	1	0	0	0	1	0	0	0	0
CNVR_935	1	130280076	130282858	2783	DEL	3	1	0	0	0	0	1	0	0	0
CNVR_936	1	130384287	130385697	1411	DEL	3	18	4	0	10	2	0	0	1	1
CNVR_937	1	130403625	130405432	1808	DEL	2	5	0	0	0	3	0	1	1	0
CNVR_938	1	130413407	130413566	160	DEL	2	1	0	0	0	1	0	0	0	0
CNVR_939	1	130505206	130519476	14271	DEL	2	1	0	0	0	0	1	0	0	0
CNVR_940	1	130518806	130567289	48484	DEL	2	8	2	0	6	0	0	0	0	0
CNVR_941	1	130924243	130924500	258	DEL	2	1	0	0	0	1	0	0	0	0
CNVR_942	1	131101265	131102396	1132	DEL	3	41	6	0	13	9	5	5	2	1
CNVR_943	1	131149955	131150630	676	DEL	4	4	2	0	1	0	0	1	0	0
CNVR_944	1	131236801	131237444	644	DEL	3	1	0	0	1	0	0	0	0	0
CNVR_945	1	131790161	131792500	2340	DEL	4	13	5	0	0	0	5	3	0	0
CNVR_946	1	132139001	132140560	1560	DEL	3	31	4	0	2	10	8	2	3	2
CNVR_947	1	132320101	132339000	18900	DEL	3	4	2	0	1	0	1	0	0	0
CNVR_948	1	132728379	132729723	1345	DEL	3	2	1	0	0	0	1	0	0	0
CNVR_949	1	132755925	132757438	1514	DEL	3	11	1	0	4	0	5	0	1	0
CNVR_950	1	132889632	132927678	38047	DEL	2	3	0	0	0	3	0	0	0	0
CNVR_951	1	133084060	133085659	1600	DEL	2	1	0	0	1	0	0	0	0	0
CNVR_952	1	133105522	133106463	942	DEL	3	1	1	0	0	0	0	0	0	0
CNVR_953	1	133226251	133252800	26550	DEL	3	5	1	0	2	0	2	0	0	0
CNVR_954	1	133459050	133459765	716	DEL	2	3	0	0	1	1	0	0	0	1
CNVR_955	1	134219101	134219673	573	DEL	2	1	0	0	0	0	0	1	0	0
CNVR_956	1	134334751	134345100	10350	DEL	4	5	5	0	0	0	0	0	0	0
CNVR_957	1	134372689	134373309	621	DEL	2	1	0	0	0	0	0	1	0	0
CNVR_958	1	134682474	134683845	1372	DEL	3	5	0	0	0	5	0	0	0	0
CNVR_959	1	134939207	134940825	1619	DEL	4	33	6	1	6	14	1	1	4	0
CNVR_960	1	134957001	134962826	5826	DEL	4	11	5	0	0	0	0	1	5	0
CNVR_961	1	134982949	134984036	1088	DEL	2	4	0	0	3	0	1	0	0	0
CNVR_962	1	135117220	135117975	756	DEL	2	2	0	0	1	0	1	0	0	0
CNVR_963	1	135120416	140017620	4897205	DEL	2	1	1	0	0	0	0	0	0	0
CNVR_964	1	135183208	135184105	898	DEL	2	1	1	0	0	0	0	0	0	0
CNVR_965	1	135201001	135202517	1517	DEL	3	6	2	0	2	1	0	1	0	0
CNVR_966	1	135539138	135543617	4480	DEL	3	12	1	0	1	7	0	0	0	3
CNVR_967	1	135757411	135758326	916	DEL	2	1	0	0	0	0	1	0	0	0
CNVR_968	1	136465251	136471750	6500	DEL	3	4	0	0	0	2	0	2	0	0
CNVR_969	1	136481712	136484633	2922	DEL	2	1	1	0	0	0	0	0	0	0
CNVR_970	1	136754862	136759664	4803	DEL	2	1	0	0	0	0	1	0	0	0
CNVR_971	1	137159611	137160522	912	DEL	2	5	2	0	2	0	0	0	0	1
CNVR_972	1	137614685	137618500	3816	DEL	3	76	11	0	11	27	15	8	3	1
CNVR_973	1	137783066	137784007	942	DEL	3	51	13	0	13	6	12	4	2	1
CNVR_974	1	137790034	137793905	3872	DEL	3	1	0	0	0	0	0	0	0	1
CNVR_975	1	138076992	138078200	1209	DEL	2	1	1	0	0	0	0	0	0	0
CNVR_976	1	138123525	138126600	3076	DEL	4	6	5	0	1	0	0	0	0	0
CNVR_977	1	138165301	138167500	2200	DEL	4	72	11	0	16	11	18	13	3	0
CNVR_978	1	138172835	138173161	327	DEL	2	4	0	0	0	3	0	0	1	0
CNVR_979	1	138235751	138237823	2073	DEL	2	1	0	0	0	0	0	1	0	0
CNVR_980	1	138258168	138259529	1362	DEL	4	9	8	0	1	0	0	0	0	0
CNVR_981	1	138426270	138426983	714	DEL	2	1	1	0	0	0	0	0	0	0
CNVR_982	1	138426521	138427141	621	DEL	2	9	2	0	1	5	1	0	0	0
CNVR_983	1	138441708	138442201	494	DEL	2	2	0	0	0	1	0	1	0	0
CNVR_984	1	138441738	138442477	740	DEL	2	1	0	0	1	0	0	0	0	0
CNVR_985	1	138443218	138444031	814	DEL	2	3	2	0	0	0	1	0	0	0
CNVR_986	1	138619535	138620324	790	DEL	2	16	4	0	3	3	3	3	0	0
CNVR_987	1	138710260	138720300	10041	DEL	3	1	0	0	1	0	0	0	0	0
CNVR_988	1	138722462	138724452	1991	DEL	2	1	0	0	1	0	0	0	0	0
CNVR_989	1	138747175	138781517	34343	DEL	4	1	0	0	0	0	1	0	0	0
CNVR_990	1	138817053	138817811	759	DEL	2	5	4	0	0	0	0	1	0	0
CNVR_991	1	138836251	138840327	4077	DEL	2	5	0	0	0	2	0	0	3	0
CNVR_992	1	138891334	138907349	16016	DEL	2	4	0	0	0	4	0	0	0	0
CNVR_993	1	138941433	138941760	328	DEL	2	2	1	0	0	1	0	0	0	0
CNVR_994	1	139067199	139067902	704	DEL	3	2	1	0	0	0	0	0	0	1
CNVR_995	1	139214370	139224941	10572	DEL	3	1	0	0	0	0	0	0	0	1
CNVR_996	1	139389190	139392600	3411	DEL	4	22	16	0	1	0	2	3	0	0
CNVR_997	1	139680328	139701933	21606	DEL	2	4	2	0	0	0	2	0	0	0
CNVR_998	1	139714201	139718750	4550	DEL	3	9	4	0	1	0	3	0	0	1
CNVR_999	1	139757201	139758987	1787	DEL	2	4	0	0	2	0	0	0	0	2
CNVR_1000	1	140012681	140013519	839	DEL	3	34	14	0	4	5	6	3	2	0
CNVR_1001	1	140112941	140113627	687	DEL	4	13	6	0	4	0	0	3	0	0
CNVR_1002	1	140149893	140150527	635	DEL	2	2	0	0	0	2	0	0	0	0
CNVR_1003	1	140355704	140356374	671	DEL	2	42	6	0	13	9	7	5	2	0
CNVR_1004	1	140377946	140378790	845	DEL	3	30	6	0	9	1	0	10	4	0
CNVR_1005	1	140572188	140572777	590	DEL	2	3	0	0	0	3	0	0	0	0
CNVR_1006	1	140602228	140624161	21934	DEL	2	3	0	0	2	1	0	0	0	0
CNVR_1007	1	141209272	141230687	21416	DEL	2	4	0	0	1	3	0	0	0	0
CNVR_1008	1	141380401	141384300	3900	DEL	3	5	2	0	0	0	3	0	0	0
CNVR_1009	1	141416451	141417361	911	DEL	2	36	11	0	4	1	13	4	0	3
CNVR_1010	1	141645311	141646704	1394	DEL	3	14	0	0	2	9	0	0	2	1
CNVR_1011	1	141999536	141999857	322	DEL	2	3	0	0	0	3	0	0	0	0
CNVR_1012	1	142045437	142046172	736	DEL	2	30	7	0	8	8	5	1	0	1
CNVR_1013	1	142048251	142050050	1800	DEL	3	1	0	0	0	1	0	0	0	0
CNVR_1014	1	142155266	142157517	2252	DEL	2	2	0	0	0	0	0	2	0	0
CNVR_1015	1	142203601	142204220	620	DEL	2	3	0	0	0	0	0	3	0	0
CNVR_1016	1	142332755	142339377	6623	DEL	3	67	20	0	23	3	6	8	4	3
CNVR_1017	1	142340251	142341000	750	DEL	3	1	0	0	0	0	0	1	0	0
CNVR_1018	1	142340565	142341354	790	DEL	2	5	3	0	0	0	1	0	1	0
CNVR_1019	1	142340611	142341010	400	DEL	2	2	0	0	2	0	0	0	0	0
CNVR_1020	1	142342591	142343362	772	DEL	2	12	3	0	3	1	1	3	0	1
CNVR_1021	1	142342914	142343530	617	DEL	2	5	0	1	0	2	1	1	0	0
CNVR_1022	1	142342926	142344563	1638	DEL	3	1	1	0	0	0	0	0	0	0
CNVR_1023	1	142349026	142349267	242	DEL	2	1	0	0	0	0	0	1	0	0
CNVR_1024	1	142365064	142367850	2787	DEL	3	9	0	0	1	0	0	7	0	1
CNVR_1025	1	142439401	142440600	1200	DEL	3	44	3	0	9	13	1	13	5	0
CNVR_1026	1	142454574	142456157	1584	DEL	3	25	10	0	5	0	7	3	0	0
CNVR_1027	1	142496085	142533024	36940	DEL	2	50	13	0	15	2	11	6	0	3
CNVR_1028	1	142496101	142497088	988	DEL	3	2	0	0	1	0	1	0	0	0
CNVR_1029	1	143008914	143011783	2870	DEL	3	16	8	0	0	4	3	0	0	1
CNVR_1030	1	143052949	143053818	870	DEL	2	18	8	0	4	0	2	2	0	2
CNVR_1031	1	143053303	143053820	518	DEL	2	5	1	0	1	0	3	0	0	0
CNVR_1032	1	143053379	143054042	664	DEL	2	2	0	0	0	0	1	1	0	0
CNVR_1033	1	143096671	143096910	240	DEL	2	1	0	0	0	1	0	0	0	0
CNVR_1034	1	143281183	143282317	1135	DEL	2	1	0	0	0	0	0	1	0	0
CNVR_1035	1	143316404	143329117	12714	DEL	2	2	0	0	0	0	0	0	2	0
CNVR_1036	1	143602515	143603462	948	DEL	2	9	3	0	2	0	4	0	0	0
CNVR_1037	1	143699899	143804592	104694	DEL	2	1	0	0	0	1	0	0	0	0
CNVR_1038	1	143766259	143773568	7310	DEL	2	38	8	0	6	7	8	6	0	3
CNVR_1039	1	143885636	143887369	1734	DEL	4	23	9	0	4	1	8	0	0	1
CNVR_1040	1	143897768	143898083	316	DEL	2	1	0	0	0	1	0	0	0	0
CNVR_1041	1	144073001	144138500	65500	DEL	4	61	1	1	0	30	0	17	12	0
CNVR_1042	1	144133430	144134466	1037	DEL	2	2	1	0	1	0	0	0	0	0
CNVR_1043	1	144134555	144135398	844	DEL	2	22	3	0	8	0	7	2	0	2
CNVR_1044	1	144579406	144586250	6845	DEL	3	2	0	0	0	0	0	2	0	0
CNVR_1045	1	144692297	144701248	8952	DEL	2	2	0	0	0	0	1	1	0	0
CNVR_1046	1	145007101	145009065	1965	DEL	3	34	11	0	7	5	4	6	1	0
CNVR_1047	1	145293251	145452900	159650	CNV	3	98	17	0	18	14	28	14	5	2
CNVR_1048	1	145293251	145428061	134811	CNV	3	109	18	0	15	23	24	17	10	2
CNVR_1049	1	145293251	145452900	159650	CNV	3	113	20	0	22	17	33	14	5	2
CNVR_1050	1	145293251	145406308	113058	CNV	3	137	17	0	19	33	31	20	15	2
CNVR_1051	1	145293929	145396471	102543	CNV	3	102	11	0	14	23	26	15	11	2
CNVR_1052	1	145294218	145294813	596	DEL	2	1	0	0	1	0	0	0	0	0
CNVR_1053	1	145294231	145356279	62049	DEL	3	58	13	0	17	8	12	5	2	1
CNVR_1054	1	145295300	145325240	29941	DEL	2	13	1	0	0	3	2	5	2	0
CNVR_1055	1	145293251	145452900	159650	CNV	3	113	20	0	22	17	33	14	5	2
CNVR_1056	1	145297013	145319135	22123	DEL	2	13	0	0	0	7	1	3	2	0
CNVR_1057	1	145297408	145332851	35444	DEL	2	3	1	0	0	0	0	2	0	0
CNVR_1058	1	145293251	145452900	159650	CNV	3	110	19	0	21	17	33	14	5	1
CNVR_1059	1	145299390	145371487	72098	DEL	3	65	1	2	1	26	11	9	14	1
CNVR_1060	1	145299622	145308669	9048	DEL	3	45	0	0	0	15	8	12	10	0
CNVR_1061	1	145293251	145452900	159650	CNV	3	109	20	0	21	16	33	13	5	1
CNVR_1062	1	145293251	145452600	159350	CNV	3	100	18	0	18	15	30	13	5	1
CNVR_1063	1	145300194	145300398	205	DEL	2	1	0	0	0	0	1	0	0	0
CNVR_1064	1	145300266	145303219	2954	DEL	2	1	0	0	1	0	0	0	0	0
CNVR_1065	1	145300465	145349980	49516	DEL	3	47	9	0	12	8	9	7	1	1
CNVR_1066	1	145295375	145403500	108126	CNV	3	154	21	0	19	39	30	24	19	2
CNVR_1067	1	145293251	145452600	159350	CNV	2	74	11	0	12	11	25	9	5	1
CNVR_1068	1	145300923	145306747	5825	DEL	2	3	0	0	0	0	2	1	0	0
CNVR_1069	1	145293251	145452900	159650	CNV	2	79	12	0	12	11	29	9	5	1
CNVR_1070	1	145293251	145452900	159650	CNV	2	96	19	0	15	14	31	10	5	2
CNVR_1071	1	145302998	145316118	13121	DEL	2	1	0	0	0	0	0	1	0	0
CNVR_1072	1	145293301	145452900	159600	CNV	2	71	10	0	12	12	22	9	5	1
CNVR_1073	1	145295375	145403500	108126	CNV	3	153	21	0	19	38	30	24	19	2
CNVR_1074	1	145293301	145452600	159300	CNV	2	58	9	0	6	11	19	9	3	1
CNVR_1075	1	145293301	145452900	159600	CNV	2	84	15	0	14	15	24	10	3	3
CNVR_1076	1	145305573	145325205	19633	DEL	2	3	0	0	0	0	1	1	1	0
CNVR_1077	1	145306001	145308651	2651	DEL	3	14	0	1	1	4	1	5	2	0
CNVR_1078	1	145310735	145356301	45567	DEL	2	20	0	0	0	6	5	4	5	0
CNVR_1079	1	145310802	145312283	1482	DEL	2	1	0	0	0	0	1	0	0	0
CNVR_1080	1	145303099	145410494	107396	CNV	3	176	20	3	19	51	31	30	20	2
CNVR_1081	1	145300491	145424674	124184	CNV	3	160	17	3	15	46	29	30	18	2
CNVR_1082	1	145306238	145381255	75018	DEL	3	66	1	1	1	25	13	11	13	1
CNVR_1083	1	145312333	145325250	12918	DEL	3	32	4	0	6	11	2	4	5	0
CNVR_1084	1	145312352	145361563	49212	DEL	2	17	0	0	0	4	6	3	4	0
CNVR_1085	1	145312425	145320484	8060	DEL	2	1	1	0	0	0	0	0	0	0
CNVR_1086	1	145305001	145435101	130101	CNV	2	102	16	0	16	17	26	14	12	1
CNVR_1087	1	145312401	145351603	39203	DEL	2	11	0	0	1	2	4	2	2	0
CNVR_1088	1	145303139	145452500	149362	CNV	3	55	8	0	7	6	10	13	8	3
CNVR_1089	1	145315769	145316086	318	DEL	2	1	0	0	0	1	0	0	0	0
CNVR_1090	1	145312404	145402538	90135	CNV	3	146	20	1	19	35	31	22	17	1
CNVR_1091	1	145318405	145347767	29363	CNV	2	12	0	1	0	5	1	4	1	0
CNVR_1092	1	145318509	145320414	1906	DEL	2	1	0	0	0	0	1	0	0	0
CNVR_1093	1	145320635	145336228	15594	DEL	2	4	1	0	0	1	1	1	0	0
CNVR_1094	1	145318238	145378539	60302	DEL	2	21	2	0	0	5	8	2	4	0
CNVR_1095	1	145323860	145353497	29638	CNV	2	10	0	1	1	5	0	2	1	0
CNVR_1096	1	145319244	145410182	90939	CNV	3	144	18	2	21	37	30	18	15	3
CNVR_1097	1	145328492	145342293	13802	DEL	2	1	0	0	0	1	0	0	0	0
CNVR_1098	1	145328491	145376037	47547	DEL	2	4	1	0	1	0	1	1	0	0
CNVR_1099	1	145325360	145415948	90589	CNV	3	132	22	2	21	35	25	15	9	3
CNVR_1100	1	145333878	145446908	113031	CNV	3	42	3	1	5	10	9	6	6	2
CNVR_1101	1	145331760	145407457	75698	CNV	3	156	21	2	24	44	28	17	17	3
CNVR_1102	1	145335945	145446908	110964	CNV	3	40	2	1	4	10	9	6	6	2
CNVR_1103	1	145336079	145356333	20255	CNV	3	13	1	1	0	8	1	0	2	0
CNVR_1104	1	145336207	145342263	6057	DEL	2	6	0	0	0	2	2	1	1	0
CNVR_1105	1	145336214	145450404	114191	CNV	3	66	4	1	3	18	20	9	9	2
CNVR_1106	1	145336221	145336762	542	DEL	2	1	0	0	0	0	1	0	0	0
CNVR_1107	1	145336254	145431003	94750	CNV	3	75	21	0	19	6	17	7	2	3
CNVR_1108	1	145336250	145401995	65746	CNV	3	120	17	1	19	31	20	16	13	3
CNVR_1109	1	145339857	145365082	25226	DEL	2	2	1	0	0	1	0	0	0	0
CNVR_1110	1	145336250	145401995	65746	CNV	3	122	18	1	21	31	20	16	13	2
CNVR_1111	1	145341400	145347658	6259	DEL	2	3	0	0	0	0	0	0	3	0
CNVR_1112	1	145336228	145450420	114193	CNV	2	61	8	1	8	10	21	6	5	2
CNVR_1113	1	145336228	145450370	114143	CNV	2	61	8	1	7	11	19	7	6	2
CNVR_1114	1	145346295	145346544	250	DEL	2	1	0	0	0	0	1	0	0	0
CNVR_1115	1	145336276	145450461	114186	CNV	2	74	15	1	8	12	22	8	5	3
CNVR_1116	1	145346532	145391727	45196	CNV	2	10	1	0	1	3	3	2	0	0
CNVR_1117	1	145348060	145353268	5209	DEL	2	1	0	0	1	0	0	0	0	0
CNVR_1118	1	145350187	145365081	14895	DEL	2	3	1	0	0	0	0	2	0	0
CNVR_1119	1	145346597	145413263	66667	CNV	2	27	1	0	4	8	7	2	5	0
CNVR_1120	1	145346704	145438945	92242	CNV	2	52	11	0	12	5	14	7	0	3
CNVR_1121	1	145352991	145413263	60273	CNV	2	17	1	0	0	4	6	1	5	0
CNVR_1122	1	145353532	145381325	27794	CNV	2	3	0	0	0	2	0	0	1	0
CNVR_1123	1	145353629	145356299	2671	DEL	2	2	0	0	0	0	0	2	0	0
CNVR_1124	1	145356600	145359462	2863	DEL	2	1	0	0	0	0	0	1	0	0
CNVR_1125	1	145353097	145402605	49509	DEL	2	13	2	0	1	4	5	0	1	0
CNVR_1126	1	145358152	145376582	18431	DEL	2	1	0	0	0	0	1	0	0	0
CNVR_1127	1	145353097	145420437	67341	CNV	2	9	1	0	2	2	4	0	0	0
CNVR_1128	1	145358666	145399938	41273	DEL	3	59	7	1	7	11	12	10	11	0
CNVR_1129	1	145364277	145376029	11753	DEL	2	2	2	0	0	0	0	0	0	0
CNVR_1130	1	145365122	145371591	6470	DEL	2	1	0	0	0	0	1	0	0	0
CNVR_1131	1	145359592	145452086	92495	CNV	3	77	1	3	2	33	16	10	12	0
CNVR_1132	1	145369215	145410406	41192	CNV	2	6	1	0	1	1	1	1	0	1
CNVR_1133	1	145371814	145397682	25869	CNV	2	3	0	0	1	1	0	1	0	0
CNVR_1134	1	145371917	145444817	72901	CNV	2	9	2	0	2	0	4	1	0	0
CNVR_1135	1	145374478	145376174	1697	DUP	2	1	0	0	0	0	1	0	0	0
CNVR_1136	1	145375315	145409039	33725	CNV	2	2	0	0	0	0	2	0	0	0
CNVR_1137	1	145375124	145381326	6203	DEL	2	1	0	0	0	0	1	0	0	0
CNVR_1138	1	145379749	145394185	14437	DEL	2	4	0	0	0	1	1	1	1	0
CNVR_1139	1	145379904	145381797	1894	DUP	2	1	0	0	0	0	1	0	0	0
CNVR_1140	1	145379931	145380736	806	DEL	2	6	1	0	4	0	1	0	0	0
CNVR_1141	1	145381791	145383101	1311	DEL	2	1	0	0	0	1	0	0	0	0
CNVR_1142	1	145383026	145387758	4733	DEL	2	1	0	0	0	0	1	0	0	0
CNVR_1143	1	145381816	145441696	59881	CNV	2	54	9	0	8	12	5	10	9	1
CNVR_1144	1	145385238	145391583	6346	DEL	2	12	0	0	2	0	1	5	4	0
CNVR_1145	1	145385263	145401181	15919	DEL	3	13	0	2	1	1	2	1	4	2
CNVR_1146	1	145386259	145418484	32226	DEL	2	15	6	0	1	2	4	2	0	0
CNVR_1147	1	145387755	145394144	6390	CNV	2	9	2	0	2	3	0	1	1	0
CNVR_1148	1	145387155	145404406	17252	DEL	2	10	0	1	0	1	2	2	4	0
CNVR_1149	1	145387791	145446656	58866	CNV	2	29	7	0	8	3	5	4	1	1
CNVR_1150	1	145387807	145433980	46174	CNV	2	50	7	0	8	12	3	10	9	1
CNVR_1151	1	145387849	145389786	1938	DEL	2	1	0	0	0	0	1	0	0	0
CNVR_1152	1	145387872	145446658	58787	CNV	2	29	7	0	8	3	5	3	2	1
CNVR_1153	1	145387876	145446656	58781	CNV	2	27	7	0	8	3	4	3	1	1
CNVR_1154	1	145387879	145391583	3705	DEL	2	2	0	0	1	0	0	0	1	0
CNVR_1155	1	145387887	145452600	64714	CNV	2	32	8	0	6	4	10	4	0	0
CNVR_1156	1	145391592	145396911	5320	DEL	2	1	0	0	0	0	0	1	0	0
CNVR_1157	1	145391718	145418484	26767	DEL	2	10	4	0	0	2	2	1	1	0
CNVR_1158	1	145391720	145418484	26765	DEL	2	9	4	0	0	1	2	1	1	0
CNVR_1159	1	145394134	145394504	371	DEL	2	1	0	0	0	0	1	0	0	0
CNVR_1160	1	145394139	145397182	3044	DEL	2	1	0	0	0	0	1	0	0	0
CNVR_1161	1	145394155	145430934	36780	DEL	2	4	0	0	0	1	1	1	1	0
CNVR_1162	1	145394183	145400993	6811	DEL	2	3	0	0	1	0	0	2	0	0
CNVR_1163	1	145398390	145452900	54511	CNV	2	47	12	0	11	2	16	6	0	0
CNVR_1164	1	145399887	145436375	36489	DEL	2	66	15	0	20	8	11	10	1	1
CNVR_1165	1	145401123	145452600	51478	CNV	2	26	7	0	5	1	10	3	0	0
CNVR_1166	1	145402850	145409256	6407	DEL	2	1	0	0	0	0	1	0	0	0
CNVR_1167	1	145405380	145415695	10316	DEL	2	1	0	0	0	0	0	1	0	0
CNVR_1168	1	145409398	145437644	28247	DEL	2	59	11	1	15	11	11	8	1	1
CNVR_1169	1	145409426	145410338	913	DEL	2	1	0	0	0	1	0	0	0	0
CNVR_1170	1	145412147	145417394	5248	DEL	2	1	0	0	0	0	1	0	0	0
CNVR_1171	1	145413194	145452360	39167	CNV	2	2	1	0	0	0	1	0	0	0
CNVR_1172	1	145416148	145424677	8530	DEL	2	1	0	0	0	0	0	1	0	0
CNVR_1173	1	145417393	145419050	1658	DUP	2	1	1	0	0	0	0	0	0	0
CNVR_1174	1	145418983	145436610	17628	DEL	2	1	0	0	1	0	0	0	0	0
CNVR_1175	1	145426580	145450392	23813	CNV	2	2	0	0	0	0	0	2	0	0
CNVR_1176	1	145426840	145429979	3140	DEL	2	1	0	0	0	0	0	1	0	0
CNVR_1177	1	145431085	145436634	5550	DEL	2	2	2	0	0	0	0	0	0	0
CNVR_1178	1	145431086	145446574	15489	DEL	2	3	1	0	1	0	1	0	0	0
CNVR_1179	1	145433813	145436907	3095	DEL	2	1	1	0	0	0	0	0	0	0
CNVR_1180	1	145436263	145450888	14626	DUP	2	1	0	0	1	0	0	0	0	0
CNVR_1181	1	145437782	145446325	8544	DEL	2	1	0	0	0	0	0	0	1	0
CNVR_1182	1	145441998	145449580	7583	DEL	3	16	3	0	2	4	3	3	0	1
CNVR_1183	1	145442020	145446420	4401	DEL	2	7	1	0	1	0	4	1	0	0
CNVR_1184	1	145446971	145450671	3701	DEL	2	1	0	0	0	1	0	0	0	0
CNVR_1185	1	145468511	147092563	1624053	DEL	2	1	0	0	0	0	1	0	0	0
CNVR_1186	1	145938973	145983500	44528	DEL	3	1	0	0	0	0	0	0	1	0
CNVR_1187	1	145948001	145956500	8500	DEL	3	2	0	0	0	1	0	1	0	0
CNVR_1188	1	146078869	146099722	20854	DEL	2	8	0	0	0	4	0	3	1	0
CNVR_1189	1	146327251	146339000	11750	DEL	2	1	0	0	0	1	0	0	0	0
CNVR_1190	1	146359801	146364250	4450	DEL	3	7	0	0	2	2	1	2	0	0
CNVR_1191	1	146527815	146555412	27598	DEL	2	1	0	0	0	1	0	0	0	0
CNVR_1192	1	146781173	148163195	1382023	DEL	2	2	0	0	0	1	0	0	0	1
CNVR_1193	1	147777224	147777949	726	DEL	3	9	3	0	3	0	1	2	0	0
CNVR_1194	1	147921095	147921445	351	DEL	2	8	0	0	0	3	2	2	0	1
CNVR_1195	1	147939426	148104628	165203	DEL	3	71	16	0	11	13	15	11	3	2
CNVR_1196	1	148128661	148129971	1311	DEL	3	3	3	0	0	0	0	0	0	0
CNVR_1197	1	148145251	148146499	1249	DEL	3	3	1	0	1	0	0	1	0	0
CNVR_1198	1	148609404	148612512	3109	DEL	3	10	1	0	3	0	1	4	0	1
CNVR_1199	1	148657063	148661730	4668	DEL	3	1	0	0	0	0	0	0	0	1
CNVR_1200	1	148890016	148898447	8432	DEL	3	30	10	0	5	0	6	4	3	2
CNVR_1201	1	148935205	148935473	269	DEL	2	1	0	0	0	1	0	0	0	0
CNVR_1202	1	149126006	149126449	444	DEL	2	2	0	0	0	0	1	0	0	1
CNVR_1203	1	149133805	151205489	2071685	DEL	2	1	1	0	0	0	0	0	0	0
CNVR_1204	1	149342969	149343982	1014	DEL	3	60	14	0	12	9	13	11	0	1
CNVR_1205	1	149364300	149364535	236	DEL	2	2	0	0	0	2	0	0	0	0
CNVR_1206	1	149380856	149382419	1564	DEL	4	108	22	1	16	25	17	18	7	2
CNVR_1207	1	149401660	149402013	354	DEL	2	1	0	0	0	1	0	0	0	0
CNVR_1208	1	149566966	149567668	703	DEL	2	13	2	0	2	1	3	3	1	1
CNVR_1209	1	149769501	149775750	6250	DEL	3	6	0	0	0	2	3	0	1	0
CNVR_1210	1	149889251	149891632	2382	DEL	3	4	1	0	1	0	0	2	0	0
CNVR_1211	1	149947942	149948682	741	DEL	3	11	0	0	7	0	3	0	1	0
CNVR_1212	1	149985304	149986602	1299	DEL	2	3	1	0	0	0	2	0	0	0
CNVR_1213	1	150012001	150012900	900	DEL	3	2	1	0	0	0	0	1	0	0
CNVR_1214	1	150060354	150061106	753	DEL	3	90	15	1	17	15	20	8	12	2
CNVR_1215	1	150062001	150107406	45406	DEL	3	77	22	0	21	8	15	7	1	3
CNVR_1216	1	150075238	150082750	7513	DEL	3	15	5	0	3	3	1	1	2	0
CNVR_1217	1	150655682	150656258	577	DEL	2	1	1	0	0	0	0	0	0	0
CNVR_1218	1	150808201	150812700	4500	DUP	3	14	0	0	6	2	5	1	0	0
CNVR_1219	1	151158026	151251890	93865	DEL	3	25	4	0	8	6	1	2	3	1
CNVR_1220	1	151293193	151293903	711	DEL	2	2	0	0	0	0	0	2	0	0
CNVR_1221	1	151310401	151311724	1324	DEL	3	53	14	0	11	16	7	0	3	2
CNVR_1222	1	151444474	151445291	818	DEL	3	4	1	0	0	1	2	0	0	0
CNVR_1223	1	151522182	151527250	5069	DUP	2	1	0	0	0	0	0	1	0	0
CNVR_1224	1	151630549	151631303	755	DEL	3	17	6	0	5	2	1	0	1	2
CNVR_1225	1	151870676	151874500	3825	DEL	3	21	0	1	0	13	0	4	3	0
CNVR_1226	1	152431622	152432580	959	DEL	2	1	1	0	0	0	0	0	0	0
CNVR_1227	1	152461649	152462156	508	DEL	2	15	0	0	2	5	2	4	2	0
CNVR_1228	1	152573182	152607283	34102	DEL	2	4	0	0	1	2	1	0	0	0
CNVR_1229	1	152980001	152988345	8345	DEL	3	1	0	0	0	0	0	0	1	0
CNVR_1230	1	153082001	153084333	2333	DEL	3	3	0	0	0	0	0	2	0	1
CNVR_1231	1	153084402	153084706	305	DEL	2	1	0	0	0	0	0	1	0	0
CNVR_1232	1	153095106	153095885	780	DEL	2	1	0	0	0	0	1	0	0	0
CNVR_1233	1	153135705	153135907	203	DEL	2	1	0	0	0	1	0	0	0	0
CNVR_1234	1	153213756	153217991	4236	DUP	2	40	13	0	11	3	7	5	0	1
CNVR_1235	1	153343741	153345926	2186	DEL	4	15	0	0	2	11	0	0	0	2
CNVR_1236	1	153390729	153392291	1563	DEL	2	1	0	0	1	0	0	0	0	0
CNVR_1237	1	153407290	153409311	2022	DEL	2	5	0	0	3	0	1	1	0	0
CNVR_1238	1	153470479	153472049	1571	DEL	3	123	21	3	24	24	18	17	13	3
CNVR_1239	1	153756432	153756533	102	DEL	2	1	0	0	0	1	0	0	0	0
CNVR_1240	1	153770027	153772388	2362	DEL	4	26	6	0	3	2	7	6	1	1
CNVR_1241	1	153895801	153901800	6000	DUP	2	3	1	0	0	0	2	0	0	0
CNVR_1242	1	154241425	154253314	11890	DEL	2	26	7	0	8	1	5	3	0	2
CNVR_1243	1	154252772	154254000	1229	DEL	3	2	0	0	0	0	1	0	0	1
CNVR_1244	1	154261640	154262458	819	DEL	3	13	2	0	5	1	4	0	1	0
CNVR_1245	1	154306513	154311000	4488	DEL	4	39	9	0	9	0	7	10	2	2
CNVR_1246	1	154826827	154827444	618	DEL	2	1	0	0	0	1	0	0	0	0
CNVR_1247	1	154826995	154827430	436	DEL	2	3	1	0	1	0	0	1	0	0
CNVR_1248	1	154869847	154871452	1606	DEL	2	1	1	0	0	0	0	0	0	0
CNVR_1249	1	155006246	155009546	3301	DEL	2	1	0	0	1	0	0	0	0	0
CNVR_1250	1	155027969	155029372	1404	DEL	3	2	2	0	0	0	0	0	0	0
CNVR_1251	1	155068960	155069679	720	DEL	2	1	0	0	0	0	0	1	0	0
CNVR_1252	1	155069107	155069620	514	DEL	2	2	0	0	0	0	1	0	1	0
CNVR_1253	1	155367380	155368380	1001	DEL	2	10	3	0	5	0	0	2	0	0
CNVR_1254	1	155367485	155368202	718	DEL	2	12	2	0	5	0	2	2	0	1
CNVR_1255	1	155367528	155368408	881	DEL	2	4	1	0	2	1	0	0	0	0
CNVR_1256	1	155468501	155470079	1579	DEL	3	6	0	0	0	3	0	1	2	0
CNVR_1257	1	156402001	156403539	1539	DEL	3	33	9	1	12	1	5	4	1	0
CNVR_1258	1	156433008	156433202	195	DEL	2	1	0	0	0	1	0	0	0	0
CNVR_1259	1	156716401	156717028	628	DEL	2	1	0	0	0	0	0	0	0	1
CNVR_1260	1	156786590	156788535	1946	DEL	3	30	2	0	3	10	9	1	5	0
CNVR_1261	1	156805920	156830115	24196	DEL	2	1	0	0	0	1	0	0	0	0
CNVR_1262	1	156873731	156875128	1398	DEL	2	1	0	0	0	0	0	0	0	1
CNVR_1263	1	156961726	156962701	976	DEL	2	7	0	0	5	0	0	2	0	0
CNVR_1264	1	156961996	156962410	415	DEL	2	1	0	0	1	0	0	0	0	0
CNVR_1265	1	156962007	156962656	650	DEL	2	4	1	0	2	0	0	1	0	0
CNVR_1266	1	157153078	157153941	864	DEL	2	18	7	0	4	0	5	2	0	0
CNVR_1267	1	157545911	157550924	5014	DEL	2	5	0	0	3	0	0	0	2	0
CNVR_1268	1	157772604	157772885	282	DEL	2	3	0	0	0	3	0	0	0	0
CNVR_1269	1	157863501	157866300	2800	DEL	3	53	14	0	11	11	8	5	2	2
CNVR_1270	1	157865750	157865963	214	DEL	2	1	0	0	0	1	0	0	0	0
CNVR_1271	1	157867316	157867495	180	DEL	2	2	0	0	0	2	0	0	0	0
CNVR_1272	1	157925734	157926689	956	DEL	2	9	3	0	0	3	2	0	1	0
CNVR_1273	1	157925763	157926724	962	DEL	2	11	1	0	0	9	0	0	1	0
CNVR_1274	1	157925822	157926658	837	DEL	2	4	2	0	0	0	1	0	1	0
CNVR_1275	1	157925830	157926441	612	DEL	2	3	0	0	1	0	1	1	0	0
CNVR_1276	1	157988278	157989429	1152	DEL	2	13	1	0	4	1	6	0	0	1
CNVR_1277	1	158011105	158011635	531	DEL	2	1	0	0	0	1	0	0	0	0
CNVR_1278	1	158122801	158124507	1707	DEL	4	5	1	0	3	0	1	0	0	0
CNVR_1279	1	158253501	158255000	1500	DEL	4	70	16	0	18	7	11	12	3	3
CNVR_1280	1	158285837	158289941	4105	DUP	2	2	0	0	2	0	0	0	0	0
CNVR_1281	1	158299457	158300898	1442	DEL	2	1	0	0	1	0	0	0	0	0
CNVR_1282	10	1428	2256	829	DEL	3	15	0	0	2	9	0	1	3	0
CNVR_1283	10	1979	9013	7035	DEL	3	7	1	0	1	2	2	0	1	0
CNVR_1284	10	3230	3682	453	DEL	2	1	0	0	1	0	0	0	0	0
CNVR_1285	10	84990	185164	100175	DEL	2	1	0	0	0	0	0	1	0	0
CNVR_1286	10	147751	149184	1434	DEL	3	30	9	0	6	1	6	5	0	3
CNVR_1287	10	343019	345090	2072	DEL	2	5	0	0	2	1	0	1	0	1
CNVR_1288	10	688461	689187	727	DEL	3	43	9	0	3	12	11	6	2	0
CNVR_1289	10	897951	899155	1205	DEL	3	8	0	0	3	0	1	3	1	0
CNVR_1290	10	899985	907500	7516	DEL	3	139	25	2	25	34	22	16	12	3
CNVR_1291	10	1065865	1067461	1597	DEL	3	4	0	0	3	0	0	0	0	1
CNVR_1292	10	1094222	1095077	856	DEL	3	4	0	0	3	0	1	0	0	0
CNVR_1293	10	1358401	1359900	1500	DEL	2	2	1	0	0	0	1	0	0	0
CNVR_1294	10	1394704	1586966	192263	DEL	2	1	0	0	0	0	1	0	0	0
CNVR_1295	10	1510251	1579251	69001	DEL	2	1	0	0	0	1	0	0	0	0
CNVR_1296	10	1596576	1599011	2436	DEL	3	26	11	0	2	6	0	5	1	1
CNVR_1297	10	1889751	1894000	4250	DEL	3	13	0	0	0	11	1	1	0	0
CNVR_1298	10	2080870	2081544	675	DEL	2	1	1	0	0	0	0	0	0	0
CNVR_1299	10	2142666	2142848	183	DEL	2	1	0	0	0	1	0	0	0	0
CNVR_1300	10	2269511	2270041	531	DEL	3	9	2	0	0	0	1	4	1	1
CNVR_1301	10	2272451	2273378	928	DEL	3	72	15	0	9	13	17	9	7	2
CNVR_1302	10	2504208	2506500	2293	DEL	4	12	0	0	11	1	0	0	0	0
CNVR_1303	10	2627018	2628161	1144	DEL	4	61	14	0	9	9	16	8	3	2
CNVR_1304	10	2674940	2676256	1317	DEL	3	4	4	0	0	0	0	0	0	0
CNVR_1305	10	2699327	2700760	1434	DEL	3	108	23	0	21	21	18	14	8	3
CNVR_1306	10	2859751	2863000	3250	DEL	4	60	9	0	9	13	14	9	4	2
CNVR_1307	10	3029323	3029756	434	DEL	2	1	0	0	1	0	0	0	0	0
CNVR_1308	10	3206703	3207419	717	DEL	2	5	0	0	2	0	3	0	0	0
CNVR_1309	10	3372226	3372649	424	DEL	2	1	0	0	0	0	0	1	0	0
CNVR_1310	10	3406251	3408077	1827	DEL	3	90	16	1	21	17	15	13	4	3
CNVR_1311	10	3596001	3598291	2291	DEL	3	3	0	0	0	3	0	0	0	0
CNVR_1312	10	3697355	3698562	1208	DEL	2	1	0	0	0	0	1	0	0	0
CNVR_1313	10	3770251	3773000	2750	DEL	3	70	18	0	15	12	12	8	3	2
CNVR_1314	10	4176874	4178500	1627	DEL	4	13	1	0	8	0	2	2	0	0
CNVR_1315	10	4201644	4203164	1521	DEL	2	57	14	0	15	7	10	6	2	3
CNVR_1316	10	4272039	4273553	1515	DEL	3	75	13	0	21	21	9	5	4	2
CNVR_1317	10	4520701	4522800	2100	DEL	2	2	0	0	1	0	0	0	0	1
CNVR_1318	10	4684213	4684353	141	DEL	2	2	0	0	0	2	0	0	0	0
CNVR_1319	10	5661533	5662221	689	DEL	2	4	0	0	4	0	0	0	0	0
CNVR_1320	10	6056716	6056933	218	DEL	2	1	0	0	0	1	0	0	0	0
CNVR_1321	10	6091234	6092162	929	DEL	2	1	0	0	0	0	0	0	0	1
CNVR_1322	10	6311405	6312077	673	DEL	2	3	1	0	1	0	1	0	0	0
CNVR_1323	10	6311585	6312049	465	DEL	2	27	5	1	5	10	0	6	0	0
CNVR_1324	10	6314881	6319803	4923	DEL	2	5	0	1	0	4	0	0	0	0
CNVR_1325	10	6336775	6336950	176	DEL	2	1	0	0	0	1	0	0	0	0
CNVR_1326	10	6344357	6345008	652	DEL	2	4	2	0	1	0	0	1	0	0
CNVR_1327	10	6546780	6547598	819	DEL	2	14	3	0	6	1	1	3	0	0
CNVR_1328	10	6546924	6547584	661	DEL	3	90	18	1	18	13	21	12	5	2
CNVR_1329	10	6628738	6630317	1580	DEL	3	23	4	0	6	8	4	0	0	1
CNVR_1330	10	6660236	6661500	1265	DEL	2	3	0	0	2	0	1	0	0	0
CNVR_1331	10	6884704	6885519	816	DEL	3	1	0	0	0	0	0	1	0	0
CNVR_1332	10	6944251	6951750	7500	DUP	2	1	1	0	0	0	0	0	0	0
CNVR_1333	10	7005565	7008216	2652	DEL	3	23	6	0	9	2	3	1	1	1
CNVR_1334	10	7026035	7027330	1296	DEL	4	101	23	0	19	20	18	13	6	2
CNVR_1335	10	7247485	7252638	5154	CNV	3	3	1	0	1	0	0	1	0	0
CNVR_1336	10	7286735	7287780	1046	DEL	3	1	1	0	0	0	0	0	0	0
CNVR_1337	10	7301528	7302051	524	DEL	2	1	1	0	0	0	0	0	0	0
CNVR_1338	10	7346401	7355700	9300	DUP	2	1	0	0	1	0	0	0	0	0
CNVR_1339	10	7431289	7432012	724	DEL	2	2	1	0	1	0	0	0	0	0
CNVR_1340	10	7771533	7772448	916	DEL	3	40	7	0	11	4	17	1	0	0
CNVR_1341	10	7999981	8000462	482	DEL	2	1	0	0	0	1	0	0	0	0
CNVR_1342	10	8000076	8000702	627	DEL	2	1	0	0	0	1	0	0	0	0
CNVR_1343	10	8092471	8093159	689	DEL	3	31	4	0	11	2	10	1	2	1
CNVR_1344	10	8138793	8139758	966	DEL	2	1	0	0	0	0	1	0	0	0
CNVR_1345	10	8152373	8152642	270	DEL	2	7	0	0	0	2	3	2	0	0
CNVR_1346	10	8263787	8264290	504	DUP	2	3	0	0	2	0	1	0	0	0
CNVR_1347	10	8614391	8614985	595	DEL	2	1	1	0	0	0	0	0	0	0
CNVR_1348	10	8614566	8615025	460	DEL	2	15	5	0	2	6	0	0	2	0
CNVR_1349	10	8660576	10280982	1620407	DEL	2	2	0	0	2	0	0	0	0	0
CNVR_1350	10	8806251	8807841	1591	DEL	3	10	3	0	3	0	0	4	0	0
CNVR_1351	10	9126851	9127495	645	DEL	3	24	6	0	4	14	0	0	0	0
CNVR_1352	10	9176156	9176695	540	DEL	2	2	0	0	0	0	2	0	0	0
CNVR_1353	10	9182501	9207250	24750	DEL	4	95	10	2	8	34	11	17	13	0
CNVR_1354	10	9471501	9473750	2250	DEL	2	1	1	0	0	0	0	0	0	0
CNVR_1355	10	9564301	9565056	756	DEL	2	4	3	0	0	0	1	0	0	0
CNVR_1356	10	9716001	9718250	2250	DEL	3	163	25	2	25	46	22	24	16	3
CNVR_1357	10	9964611	9969663	5053	DEL	2	2	0	0	1	0	1	0	0	0
CNVR_1358	10	9975501	9995400	19900	DUP	2	38	6	0	14	2	11	5	0	0
CNVR_1359	10	10097501	10108765	11265	DEL	3	1	0	0	0	0	0	1	0	0
CNVR_1360	10	10259853	10261028	1176	DEL	3	24	6	0	8	0	8	1	1	0
CNVR_1361	10	10294240	10299000	4761	DEL	3	5	0	0	0	5	0	0	0	0
CNVR_1362	10	10469918	10471000	1083	DEL	4	132	25	0	25	24	24	21	10	3
CNVR_1363	10	10934728	10935595	868	DEL	2	2	0	0	2	0	0	0	0	0
CNVR_1364	10	11138419	11139003	585	DEL	2	4	1	0	0	1	1	0	1	0
CNVR_1365	10	11538358	11538989	632	DEL	2	2	1	0	0	0	1	0	0	0
CNVR_1366	10	11538510	11539349	840	DEL	2	1	0	0	1	0	0	0	0	0
CNVR_1367	10	11538518	11538989	472	DEL	3	28	3	0	2	12	3	5	2	1
CNVR_1368	10	11640501	11646300	5800	DEL	4	21	7	0	5	0	7	1	0	1
CNVR_1369	10	11736586	11739250	2665	DEL	2	1	1	0	0	0	0	0	0	0
CNVR_1370	10	12854645	12855697	1053	DEL	2	1	1	0	0	0	0	0	0	0
CNVR_1371	10	12866839	12868624	1786	DEL	3	19	0	0	7	11	1	0	0	0
CNVR_1372	10	13056944	13058478	1535	DEL	2	1	0	0	1	0	0	0	0	0
CNVR_1373	10	13281161	13282719	1559	DEL	3	2	0	0	2	0	0	0	0	0
CNVR_1374	10	13390788	13391826	1039	DEL	3	14	0	0	7	1	1	3	0	2
CNVR_1375	10	13475290	13476000	711	DEL	3	8	2	0	1	0	3	2	0	0
CNVR_1376	10	13802805	13803503	699	DEL	3	24	10	0	3	1	10	0	0	0
CNVR_1377	10	13992501	14003250	10750	DEL	3	9	0	0	0	5	0	3	1	0
CNVR_1378	10	14126099	14126458	360	DEL	2	1	0	0	0	0	0	1	0	0
CNVR_1379	10	14126201	14126411	211	DEL	2	3	0	0	0	3	0	0	0	0
CNVR_1380	10	14304082	14304328	247	DEL	2	5	0	0	0	5	0	0	0	0
CNVR_1381	10	14385463	14386062	600	DEL	2	1	0	0	0	0	0	1	0	0
CNVR_1382	10	15052577	15052879	303	DEL	2	1	0	0	0	1	0	0	0	0
CNVR_1383	10	15164621	15164826	206	DEL	2	1	0	0	0	1	0	0	0	0
CNVR_1384	10	15771001	15771993	993	DEL	2	2	1	0	0	0	1	0	0	0
CNVR_1385	10	15801460	15802952	1493	DEL	3	119	24	1	24	22	24	13	8	3
CNVR_1386	10	15920655	15921405	751	DEL	2	6	2	0	1	0	1	2	0	0
CNVR_1387	10	16223453	16224216	764	DEL	2	10	7	0	1	1	0	1	0	0
CNVR_1388	10	16660201	16666500	6300	DEL	4	21	9	1	4	3	3	1	0	0
CNVR_1389	10	16766096	16766750	655	DEL	2	6	0	0	2	1	1	2	0	0
CNVR_1390	10	17324377	17325252	876	DEL	2	4	3	0	0	0	0	0	0	1
CNVR_1391	10	17423174	17425267	2094	DEL	3	54	0	0	0	31	0	12	11	0
CNVR_1392	10	17656364	17658743	2380	DEL	2	1	0	0	1	0	0	0	0	0
CNVR_1393	10	17661791	17662258	468	DEL	2	2	0	0	0	1	0	1	0	0
CNVR_1394	10	17772601	17789000	16400	DUP	3	19	6	0	10	0	3	0	0	0
CNVR_1395	10	17806494	17807433	940	DEL	3	34	14	0	15	0	4	1	0	0
CNVR_1396	10	17842251	17846000	3750	DEL	3	104	16	0	11	34	19	14	7	3
CNVR_1397	10	18097470	18284522	187053	DEL	2	2	1	0	0	1	0	0	0	0
CNVR_1398	10	18109166	18130631	21466	DUP	2	4	0	0	0	4	0	0	0	0
CNVR_1399	10	18198368	18199088	721	DEL	2	1	0	0	0	0	0	1	0	0
CNVR_1400	10	18198596	18199086	491	DEL	2	1	0	0	1	0	0	0	0	0
CNVR_1401	10	18296682	18298750	2069	DEL	3	4	0	0	0	2	0	2	0	0
CNVR_1402	10	18375418	18375719	302	DEL	2	1	0	0	0	1	0	0	0	0
CNVR_1403	10	18565036	18565589	554	DEL	2	1	0	0	0	0	1	0	0	0
CNVR_1404	10	18565144	18565525	382	DEL	2	8	0	0	0	6	0	0	1	1
CNVR_1405	10	19855501	19863250	7750	DEL	4	62	12	0	14	13	14	6	2	1
CNVR_1406	10	19889007	19889384	378	DEL	2	8	0	0	0	6	0	1	1	0
CNVR_1407	10	19977373	19977689	317	DEL	2	3	0	0	0	2	0	0	1	0
CNVR_1408	10	20284702	20304220	19519	DEL	2	12	4	0	3	0	4	1	0	0
CNVR_1409	10	20296589	20297369	781	DEL	2	7	0	0	3	0	1	0	3	0
CNVR_1410	10	21427909	21428973	1065	DEL	2	7	2	0	1	0	1	0	1	2
CNVR_1411	10	21897555	21898839	1285	DEL	3	5	4	0	0	0	1	0	0	0
CNVR_1412	10	21928416	21953237	24822	DEL	2	1	0	0	0	1	0	0	0	0
CNVR_1413	10	21977943	21978117	175	DEL	2	1	0	0	0	1	0	0	0	0
CNVR_1414	10	22000672	22022250	21579	DEL	2	1	0	0	0	0	0	0	1	0
CNVR_1415	10	22066587	22068632	2046	DEL	3	178	25	3	25	53	27	26	16	3
CNVR_1416	10	22073549	22088248	14700	DEL	2	3	2	0	0	0	1	0	0	0
CNVR_1417	10	22262989	22263829	841	DEL	4	38	4	0	13	7	6	4	1	3
CNVR_1418	10	22271317	23264637	993321	DEL	2	5	2	0	0	0	1	2	0	0
CNVR_1419	10	22393493	22408895	15403	DEL	2	5	0	0	0	0	0	3	2	0
CNVR_1420	10	22427282	22427539	258	DEL	2	2	0	0	0	2	0	0	0	0
CNVR_1421	10	22456251	22459006	2756	DEL	2	1	1	0	0	0	0	0	0	0
CNVR_1422	10	22475658	22490101	14444	DEL	2	1	0	0	1	0	0	0	0	0
CNVR_1423	10	22493983	22500250	6268	DEL	3	22	7	0	6	0	4	3	1	1
CNVR_1424	10	22510751	22608806	98056	DEL	2	1	0	0	0	0	0	1	0	0
CNVR_1425	10	22515358	22796035	280678	DEL	2	2	0	0	0	0	1	1	0	0
CNVR_1426	10	22526591	25267663	2741073	CNV	3	54	7	1	6	15	8	10	6	1
CNVR_1427	10	22530291	24668156	2137866	CNV	3	45	6	0	6	11	6	9	6	1
CNVR_1428	10	22555041	23511416	956376	DEL	2	6	0	0	2	1	0	2	0	1
CNVR_1429	10	22528929	25383101	2854173	DEL	2	9	1	1	1	1	2	2	0	1
CNVR_1430	10	22586186	23794535	1208350	DEL	2	19	2	0	2	5	3	4	3	0
CNVR_1431	10	22624262	22670435	46174	DEL	2	5	0	0	0	1	1	2	1	0
CNVR_1432	10	22627231	22761666	134436	CNV	3	9	1	0	1	2	2	1	1	1
CNVR_1433	10	22665548	22782080	116533	DEL	2	4	0	0	1	2	0	0	0	1
CNVR_1434	10	22692146	23160657	468512	DEL	2	22	3	0	0	8	5	3	3	0
CNVR_1435	10	22699322	22793278	93957	DEL	3	31	5	0	6	9	4	5	2	0
CNVR_1436	10	22770794	22771511	718	DEL	2	6	3	0	1	0	1	1	0	0
CNVR_1437	10	22796701	22798979	2279	DEL	2	1	1	0	0	0	0	0	0	0
CNVR_1438	10	22831501	22852033	20533	DEL	4	9	0	0	2	0	5	0	1	1
CNVR_1439	10	22833948	23577776	743829	DEL	3	61	8	0	8	17	10	11	5	2
CNVR_1440	10	22865701	22876594	10894	DEL	4	17	3	0	3	0	9	1	0	1
CNVR_1441	10	22935266	22936094	829	DEL	2	44	11	0	10	8	9	4	1	1
CNVR_1442	10	22936938	22937418	481	DEL	2	2	1	0	0	1	0	0	0	0
CNVR_1443	10	22943548	22954499	10952	DEL	3	1	0	0	0	1	0	0	0	0
CNVR_1444	10	22954720	23000733	46014	DEL	2	6	0	0	0	3	0	2	1	0
CNVR_1445	10	22971436	23016769	45334	DEL	2	4	1	0	1	1	1	0	0	0
CNVR_1446	10	23025649	23026063	415	DEL	2	4	0	0	0	0	2	0	1	1
CNVR_1447	10	23025719	23026359	641	DEL	2	1	0	0	0	0	0	1	0	0
CNVR_1448	10	23025720	23026047	328	DEL	2	7	0	0	0	4	1	1	0	1
CNVR_1449	10	23094216	23094787	572	DEL	2	3	0	0	1	0	2	0	0	0
CNVR_1450	10	23118251	25023840	1905590	CNV	3	109	12	2	17	34	19	15	8	2
CNVR_1451	10	23154003	23154671	669	DEL	2	1	1	0	0	0	0	0	0	0
CNVR_1452	10	23154128	23154537	410	DEL	2	1	1	0	0	0	0	0	0	0
CNVR_1453	10	23164416	23172539	8124	DEL	3	45	11	0	10	7	10	5	0	2
CNVR_1454	10	23186977	23187581	605	DEL	2	1	0	0	0	0	0	1	0	0
CNVR_1455	10	23228701	23487100	258400	DEL	3	12	4	0	2	1	2	1	0	2
CNVR_1456	10	23307838	23781198	473361	DEL	2	2	0	0	0	0	1	0	1	0
CNVR_1457	10	23362266	24023489	661224	DEL	3	16	3	0	3	2	4	2	2	0
CNVR_1458	10	23367942	25375166	2007225	DEL	3	83	12	2	15	20	17	8	7	2
CNVR_1459	10	23377915	24565453	1187539	DEL	3	23	3	0	3	4	5	5	2	1
CNVR_1460	10	23430616	23543818	113203	DEL	3	2	1	0	1	0	0	0	0	0
CNVR_1461	10	23443703	23444585	883	DEL	3	4	0	0	2	0	1	0	0	1
CNVR_1462	10	23444164	23445933	1770	DEL	2	1	0	0	0	0	0	1	0	0
CNVR_1463	10	23478293	23502847	24555	DUP	2	1	0	0	0	1	0	0	0	0
CNVR_1464	10	23520705	23523983	3279	DEL	2	5	0	0	1	4	0	0	0	0
CNVR_1465	10	23556087	23556344	258	DEL	2	1	0	0	0	1	0	0	0	0
CNVR_1466	10	23582001	23737017	155017	DEL	3	9	0	0	0	3	0	3	3	0
CNVR_1467	10	23599773	25224751	1624979	DEL	2	8	1	1	0	3	0	2	1	0
CNVR_1468	10	23629170	24148142	518973	DEL	3	32	3	0	7	7	9	2	2	2
CNVR_1469	10	23654701	23750000	95300	DEL	3	21	6	0	3	1	7	2	0	2
CNVR_1470	10	23814474	23815258	785	DEL	2	2	0	0	0	0	1	0	1	0
CNVR_1471	10	23839662	24333727	494066	DEL	3	9	2	0	1	2	2	1	1	0
CNVR_1472	10	23860585	25229069	1368485	CNV	2	31	0	1	2	13	4	6	4	1
CNVR_1473	10	23927578	23972764	45187	CNV	3	32	7	0	11	2	8	2	1	1
CNVR_1474	10	24027847	24852064	824218	DEL	2	2	0	0	0	0	1	1	0	0
CNVR_1475	10	24086637	25393338	1306702	DEL	2	11	0	0	0	4	1	6	0	0
CNVR_1476	10	24112349	24169646	57298	DEL	2	1	1	0	0	0	0	0	0	0
CNVR_1477	10	24153234	24154668	1435	DEL	3	36	6	0	12	3	7	6	0	2
CNVR_1478	10	24158191	24179703	21513	DEL	3	5	4	0	0	0	0	0	1	0
CNVR_1479	10	24165001	24258032	93032	DEL	3	22	6	0	4	0	6	2	1	3
CNVR_1480	10	24183771	24184413	643	DEL	2	3	0	0	0	1	2	0	0	0
CNVR_1481	10	24213338	24277654	64317	DEL	2	1	0	0	0	1	0	0	0	0
CNVR_1482	10	24241976	24457490	215515	DEL	2	4	0	0	0	4	0	0	0	0
CNVR_1483	10	24256802	24905202	648401	CNV	3	25	1	2	0	8	5	4	4	1
CNVR_1484	10	24359904	24459862	99959	DEL	2	21	6	0	6	0	3	5	0	1
CNVR_1485	10	24461074	25253168	792095	DEL	2	3	0	0	0	1	1	1	0	0
CNVR_1486	10	24490523	24869736	379214	DEL	3	42	8	0	6	10	10	3	3	2
CNVR_1487	10	24511473	24537395	25923	DEL	3	5	1	0	1	0	3	0	0	0
CNVR_1488	10	24530554	24965145	434592	DEL	3	22	2	0	1	12	3	1	3	0
CNVR_1489	10	24570435	24571979	1545	DEL	3	46	10	0	10	3	13	6	1	3
CNVR_1490	10	24597733	25004601	406869	DEL	3	5	0	0	0	1	2	1	1	0
CNVR_1491	10	24712689	24714900	2212	DEL	4	5	3	0	0	0	2	0	0	0
CNVR_1492	10	24718026	24722146	4121	DEL	3	4	1	0	0	1	2	0	0	0
CNVR_1493	10	24736157	25019681	283525	DEL	2	4	0	0	0	0	1	2	1	0
CNVR_1494	10	24742270	24754142	11873	DEL	2	1	0	0	0	0	0	1	0	0
CNVR_1495	10	24807987	24808921	935	DEL	2	5	1	0	1	0	3	0	0	0
CNVR_1496	10	24827247	24828252	1006	DEL	3	78	18	0	15	17	17	5	3	3
CNVR_1497	10	24895251	24897867	2617	DEL	3	8	1	0	1	0	1	5	0	0
CNVR_1498	10	24903269	24905198	1930	DEL	2	2	0	0	0	0	2	0	0	0
CNVR_1499	10	25012981	25391867	378887	DEL	2	2	2	0	0	0	0	0	0	0
CNVR_1500	10	25020681	25021299	619	DEL	3	35	6	0	10	3	4	6	4	2
CNVR_1501	10	25231101	25232046	946	DEL	3	63	16	0	8	13	19	4	1	2
CNVR_1502	10	25272657	25276353	3697	DEL	2	1	0	0	0	0	1	0	0	0
CNVR_1503	10	25317760	25464965	147206	DEL	2	1	0	0	0	1	0	0	0	0
CNVR_1504	10	25319596	25320520	925	DEL	2	12	1	0	3	0	1	4	2	1
CNVR_1505	10	25419316	25473670	54355	DEL	2	8	2	0	1	0	1	2	1	1
CNVR_1506	10	25423323	25450750	27428	DEL	2	1	0	0	0	0	0	1	0	0
CNVR_1507	10	25442494	25526100	83607	CNV	2	5	2	0	0	1	0	1	1	0
CNVR_1508	10	25446846	25494291	47446	DEL	2	1	0	0	0	0	0	1	0	0
CNVR_1509	10	25460285	25485624	25340	DEL	2	2	0	0	0	0	0	2	0	0
CNVR_1510	10	25473592	25536075	62484	DEL	2	1	0	0	0	0	0	0	1	0
CNVR_1511	10	25476359	25500437	24079	DEL	2	15	0	0	2	1	0	10	2	0
CNVR_1512	10	25503289	25525830	22542	DEL	2	2	0	0	0	1	0	0	1	0
CNVR_1513	10	25522628	25542856	20229	DEL	2	1	0	0	0	0	0	0	1	0
CNVR_1514	10	25531693	25549068	17376	DUP	2	1	0	0	0	1	0	0	0	0
CNVR_1515	10	25556385	25559576	3192	DEL	2	1	0	0	0	0	0	1	0	0
CNVR_1516	10	25605422	25606024	603	DEL	2	2	0	0	0	0	1	1	0	0
CNVR_1517	10	25979313	25980218	906	DEL	2	3	0	0	1	2	0	0	0	0
CNVR_1518	10	25979339	25979856	518	DEL	2	1	0	0	0	1	0	0	0	0
CNVR_1519	10	26164736	26166092	1357	DEL	4	21	3	0	7	2	6	1	0	2
CNVR_1520	10	26207001	26232035	25035	DUP	3	20	7	0	5	1	3	2	0	2
CNVR_1521	10	26223675	26224577	903	DEL	3	45	10	0	16	0	11	5	0	3
CNVR_1522	10	26484647	26485769	1123	DEL	4	143	25	1	25	39	20	16	14	3
CNVR_1523	10	26667644	26679166	11523	DEL	3	2	0	0	0	0	0	2	0	0
CNVR_1524	10	26672640	26685155	12516	DEL	2	1	0	0	0	0	1	0	0	0
CNVR_1525	10	26730792	26731520	729	DEL	3	23	5	1	8	1	0	5	3	0
CNVR_1526	10	26835508	26836050	543	DEL	2	2	0	0	0	0	1	0	1	0
CNVR_1527	10	26892601	26898933	6333	DEL	2	1	0	0	0	0	1	0	0	0
CNVR_1528	10	26911371	26913750	2380	DEL	3	6	0	0	2	0	1	3	0	0
CNVR_1529	10	26912524	26914827	2304	DEL	2	2	0	0	0	0	0	0	2	0
CNVR_1530	10	26914534	26914771	238	DEL	2	1	0	0	0	0	0	0	1	0
CNVR_1531	10	26934075	26934466	392	DEL	2	2	0	0	0	1	0	1	0	0
CNVR_1532	10	26961595	26966737	5143	DEL	2	1	0	0	0	0	1	0	0	0
CNVR_1533	10	27039989	27044340	4352	DEL	2	7	1	0	4	0	1	0	0	1
CNVR_1534	10	27101289	27102486	1198	DEL	4	42	12	0	9	8	5	5	2	1
CNVR_1535	10	27103501	27107000	3500	DEL	3	54	8	0	11	10	11	9	4	1
CNVR_1536	10	27110230	27111900	1671	DEL	3	25	9	0	7	4	0	3	1	1
CNVR_1537	10	27111359	27112017	659	DEL	2	5	2	0	0	2	0	0	1	0
CNVR_1538	10	27129183	27130925	1743	DEL	4	26	9	0	5	2	7	1	1	1
CNVR_1539	10	27154062	27600561	446500	DEL	2	53	13	0	14	5	12	5	1	3
CNVR_1540	10	27233701	27235139	1439	DEL	4	34	10	0	8	1	6	5	2	2
CNVR_1541	10	27258031	27268183	10153	DEL	2	1	0	0	0	0	1	0	0	0
CNVR_1542	10	27325223	27326877	1655	DEL	4	47	10	0	5	22	5	1	2	2
CNVR_1543	10	27363501	27374000	10500	DEL	4	57	15	0	21	4	11	5	0	1
CNVR_1544	10	27399251	27406250	7000	DEL	3	135	23	3	25	29	27	20	5	3
CNVR_1545	10	27462868	27512490	49623	DEL	2	4	0	0	0	2	0	2	0	0
CNVR_1546	10	27475325	27476886	1562	DEL	3	106	22	1	21	27	17	12	3	3
CNVR_1547	10	27508834	27509912	1079	DEL	3	62	15	0	8	12	14	10	2	1
CNVR_1548	10	27558347	27602892	44546	DEL	3	1	0	0	0	0	0	0	0	1
CNVR_1549	10	27575290	27584496	9207	DEL	3	78	21	0	18	10	16	8	2	3
CNVR_1550	10	27609631	27613243	3613	DEL	3	1	0	0	0	0	0	0	0	1
CNVR_1551	10	27622600	27661575	38976	DEL	2	1	0	0	0	0	0	1	0	0
CNVR_1552	10	27634201	27663250	29050	DEL	4	28	12	0	1	2	8	4	0	1
CNVR_1553	10	27683648	27684179	532	DEL	2	9	2	0	1	2	1	2	0	1
CNVR_1554	10	27713536	27713811	276	DEL	2	1	0	0	0	1	0	0	0	0
CNVR_1555	10	27726501	27737750	11250	DUP	2	28	10	0	8	2	3	4	0	1
CNVR_1556	10	27734535	27734780	246	DEL	2	1	0	0	0	1	0	0	0	0
CNVR_1557	10	27746826	27747445	620	DEL	3	25	7	0	5	3	7	3	0	0
CNVR_1558	10	27746891	27747560	670	DEL	2	2	1	0	1	0	0	0	0	0
CNVR_1559	10	27767008	27769516	2509	DEL	3	15	9	0	1	0	1	3	0	1
CNVR_1560	10	27771507	27772311	805	DEL	3	9	3	0	0	5	1	0	0	0
CNVR_1561	10	27771711	27772311	601	DEL	2	10	0	0	0	10	0	0	0	0
CNVR_1562	10	27829124	27829559	436	DEL	2	3	0	0	0	1	0	2	0	0
CNVR_1563	10	27833607	27834447	841	DEL	2	2	0	0	0	0	0	2	0	0
CNVR_1564	10	27836369	27837224	856	DEL	2	1	0	0	0	0	0	0	0	1
CNVR_1565	10	27836389	27836952	564	DEL	2	2	1	0	0	0	0	1	0	0
CNVR_1566	10	27914391	27914538	148	DEL	2	1	0	0	0	1	0	0	0	0
CNVR_1567	10	27928290	27930814	2525	DEL	2	2	0	0	1	0	1	0	0	0
CNVR_1568	10	27933074	27934615	1542	DEL	2	11	5	0	3	0	0	2	0	1
CNVR_1569	10	27960397	27996790	36394	DEL	2	3	0	0	0	0	1	2	0	0
CNVR_1570	10	27967047	27967919	873	DEL	3	55	14	0	11	11	10	4	4	1
CNVR_1571	10	27983893	27986099	2207	DEL	3	28	11	0	7	3	3	3	0	1
CNVR_1572	10	27992382	27993444	1063	DEL	3	56	17	1	11	14	7	3	2	1
CNVR_1573	10	27995401	27997250	1850	DEL	3	4	2	0	1	1	0	0	0	0
CNVR_1574	10	28060894	28063250	2357	DEL	3	94	16	1	13	31	18	7	6	2
CNVR_1575	10	28092558	28112813	20256	DEL	2	7	0	0	0	4	1	0	2	0
CNVR_1576	10	28131501	28140000	8500	DEL	3	22	8	0	7	0	3	2	0	2
CNVR_1577	10	28660518	28660736	219	DEL	2	1	0	0	0	1	0	0	0	0
CNVR_1578	10	29376068	29377293	1226	DEL	2	10	5	0	2	0	2	1	0	0
CNVR_1579	10	29376590	29377450	861	DEL	2	24	1	0	9	5	5	2	0	2
CNVR_1580	10	29376718	29377450	733	DEL	2	12	0	0	4	4	2	0	0	2
CNVR_1581	10	29417672	29442571	24900	DEL	2	7	0	0	2	4	1	0	0	0
CNVR_1582	10	29514292	29514531	240	DEL	2	1	0	0	0	1	0	0	0	0
CNVR_1583	10	29760912	29770011	9100	DEL	3	4	0	0	1	2	1	0	0	0
CNVR_1584	10	29880501	29883065	2565	DEL	4	24	5	0	7	0	1	9	0	2
CNVR_1585	10	29899294	29900635	1342	DEL	3	138	23	1	25	30	21	21	14	3
CNVR_1586	10	30065035	30065273	239	DEL	2	1	0	0	0	1	0	0	0	0
CNVR_1587	10	30392199	30393245	1047	DEL	2	1	0	0	1	0	0	0	0	0
CNVR_1588	10	30584030	30585136	1107	DEL	3	3	2	0	0	1	0	0	0	0
CNVR_1589	10	30645501	30647368	1868	DEL	4	5	0	0	0	0	0	5	0	0
CNVR_1590	10	30955986	30956134	149	DEL	2	4	0	0	0	4	0	0	0	0
CNVR_1591	10	31045480	31049132	3653	DEL	3	6	6	0	0	0	0	0	0	0
CNVR_1592	10	31131901	31145700	13800	DEL	4	3	0	0	1	0	2	0	0	0
CNVR_1593	10	31428133	31454777	26645	DEL	2	45	11	0	12	5	10	3	2	2
CNVR_1594	10	31798745	31799985	1241	DEL	2	1	0	0	1	0	0	0	0	0
CNVR_1595	10	31831501	31832507	1007	DEL	3	5	0	0	0	1	2	0	1	1
CNVR_1596	10	31969501	31971559	2059	DEL	4	24	4	0	10	2	1	5	1	1
CNVR_1597	10	32072909	32074642	1734	DEL	3	8	1	0	4	0	0	0	3	0
CNVR_1598	10	32133618	32134422	805	DEL	2	2	2	0	0	0	0	0	0	0
CNVR_1599	10	32284760	32288606	3847	DEL	3	1	0	0	0	0	1	0	0	0
CNVR_1600	10	32314654	32315214	561	DEL	3	2	0	0	2	0	0	0	0	0
CNVR_1601	10	32482181	32482768	588	DEL	2	1	0	0	0	0	0	1	0	0
CNVR_1602	10	32526001	32539000	13000	DEL	3	27	4	0	4	3	9	5	0	2
CNVR_1603	10	32585133	32589900	4768	DEL	4	11	1	0	3	0	4	2	0	1
CNVR_1604	10	33049944	33051900	1957	DEL	3	5	3	0	0	0	2	0	0	0
CNVR_1605	10	33073501	33080750	7250	DEL	3	88	13	2	12	37	9	9	3	3
CNVR_1606	10	33308713	33310277	1565	DEL	3	75	12	1	18	13	17	8	4	2
CNVR_1607	10	33411962	33781185	369224	DEL	2	7	1	0	4	0	1	1	0	0
CNVR_1608	10	33420537	33423600	3064	DEL	3	7	0	0	4	1	1	0	0	1
CNVR_1609	10	33686709	33686979	271	DEL	2	2	0	0	0	2	0	0	0	0
CNVR_1610	10	34105501	34109024	3524	DEL	4	8	8	0	0	0	0	0	0	0
CNVR_1611	10	34475841	34481500	5660	DEL	4	172	24	2	25	51	23	26	18	3
CNVR_1612	10	34493206	34496700	3495	DUP	2	3	1	0	1	0	1	0	0	0
CNVR_1613	10	34530251	34534009	3759	DEL	3	13	8	0	1	0	2	0	0	2
CNVR_1614	10	34559934	34560338	405	DEL	2	6	3	0	0	1	0	1	1	0
CNVR_1615	10	34707668	34709072	1405	DEL	2	4	0	0	0	1	3	0	0	0
CNVR_1616	10	34840848	34841643	796	DEL	2	1	1	0	0	0	0	0	0	0
CNVR_1617	10	34840911	34841430	520	DEL	2	2	1	0	0	0	0	1	0	0
CNVR_1618	10	35092855	35093158	304	DEL	2	4	1	0	0	1	0	1	1	0
CNVR_1619	10	35097421	35120151	22731	DEL	2	2	0	0	0	1	0	1	0	0
CNVR_1620	10	35461928	35575851	113924	DEL	2	1	1	0	0	0	0	0	0	0
CNVR_1621	10	35920135	35920713	579	DEL	2	1	0	0	0	0	0	1	0	0
CNVR_1622	10	37065610	37066266	657	DEL	2	2	1	0	0	0	1	0	0	0
CNVR_1623	10	37154135	37155250	1116	DEL	3	4	0	0	0	1	0	2	1	0
CNVR_1624	10	37966427	37967809	1383	DEL	3	58	4	0	18	17	12	6	0	1
CNVR_1625	10	38139734	38139986	253	DEL	2	1	0	0	0	1	0	0	0	0
CNVR_1626	10	38461934	38462812	879	DEL	3	78	22	0	21	8	15	7	3	2
CNVR_1627	10	38605236	38606417	1182	DEL	3	63	7	0	18	14	11	9	2	2
CNVR_1628	10	38842694	38849339	6646	DEL	3	7	3	0	2	0	0	1	0	1
CNVR_1629	10	38856608	38860146	3539	DEL	3	3	1	0	0	2	0	0	0	0
CNVR_1630	10	39131927	39132614	688	DEL	2	15	0	0	3	5	7	0	0	0
CNVR_1631	10	39132002	39132576	575	DEL	2	7	0	0	3	2	2	0	0	0
CNVR_1632	10	39212601	39213369	769	DEL	2	1	0	0	0	1	0	0	0	0
CNVR_1633	10	39318542	39318799	258	DEL	2	2	0	0	0	1	1	0	0	0
CNVR_1634	10	39320251	39327750	7500	DEL	3	144	24	1	25	36	19	22	14	3
CNVR_1635	10	39429305	39484963	55659	DEL	2	1	0	0	0	1	0	0	0	0
CNVR_1636	10	39433823	39434856	1034	DEL	2	18	1	0	5	0	10	0	1	1
CNVR_1637	10	39654082	39669903	15822	DEL	3	8	2	0	3	0	2	0	1	0
CNVR_1638	10	39699444	39700046	603	DEL	2	1	1	0	0	0	0	0	0	0
CNVR_1639	10	39818532	39818830	299	DEL	2	1	0	0	0	1	0	0	0	0
CNVR_1640	10	39822751	39828300	5550	DEL	4	31	6	0	9	1	8	4	0	3
CNVR_1641	10	39907825	39909006	1182	DEL	3	12	4	0	0	5	2	1	0	0
CNVR_1642	10	40047875	40049795	1921	DEL	3	8	7	0	0	1	0	0	0	0
CNVR_1643	10	40082290	40083216	927	DEL	2	33	12	0	8	2	6	4	1	0
CNVR_1644	10	40175065	40177387	2323	DEL	2	1	1	0	0	0	0	0	0	0
CNVR_1645	10	40254049	40255483	1435	DEL	3	8	0	0	2	3	1	1	1	0
CNVR_1646	10	40382449	40382827	379	DEL	2	1	0	0	0	0	0	0	1	0
CNVR_1647	10	40418433	40419775	1343	DEL	4	7	0	0	0	4	0	3	0	0
CNVR_1648	10	40435093	40436919	1827	DEL	4	81	9	1	6	33	12	16	2	2
CNVR_1649	10	40914372	40915027	656	DEL	2	3	0	0	0	1	2	0	0	0
CNVR_1650	10	40929203	40930701	1499	DEL	2	1	1	0	0	0	0	0	0	0
CNVR_1651	10	41052751	41057750	5000	DUP	2	18	6	0	5	2	4	0	1	0
CNVR_1652	10	41107021	41107740	720	DEL	3	39	11	0	3	7	7	4	7	0
CNVR_1653	10	41240346	41243000	2655	DEL	4	21	5	0	5	0	4	7	0	0
CNVR_1654	10	41400871	41401175	305	DEL	2	4	0	0	0	3	0	1	0	0
CNVR_1655	10	41417957	41419009	1053	DEL	3	49	6	0	18	10	8	1	3	3
CNVR_1656	10	41554804	41555503	700	DEL	3	27	6	0	8	6	3	2	0	2
CNVR_1657	10	41581251	41601300	20050	DEL	4	63	11	0	15	18	9	5	2	3
CNVR_1658	10	41591559	41592323	765	DEL	3	10	2	0	8	0	0	0	0	0
CNVR_1659	10	41668501	41669925	1425	DEL	3	27	11	0	1	5	6	4	0	0
CNVR_1660	10	41891665	41892384	720	DEL	2	3	0	0	2	0	1	0	0	0
CNVR_1661	10	42009602	42011208	1607	DEL	3	1	0	0	1	0	0	0	0	0
CNVR_1662	10	42101395	42138537	37143	DUP	2	3	0	0	0	3	0	0	0	0
CNVR_1663	10	42188379	42192250	3872	DUP	2	6	1	0	3	0	1	1	0	0
CNVR_1664	10	42192251	42196000	3750	DEL	3	24	7	0	5	3	3	5	0	1
CNVR_1665	10	42438009	42439043	1035	DEL	2	4	4	0	0	0	0	0	0	0
CNVR_1666	10	43098059	43098453	395	DEL	2	4	0	0	0	3	0	0	1	0
CNVR_1667	10	43408374	43441595	33222	DEL	2	34	6	0	4	6	4	6	6	2
CNVR_1668	10	43588841	43590880	2040	DEL	3	8	2	0	5	0	0	1	0	0
CNVR_1669	10	43760120	43760575	456	DEL	2	3	0	0	0	0	0	2	1	0
CNVR_1670	10	43768356	43768598	243	DEL	2	1	0	0	0	0	0	1	0	0
CNVR_1671	10	43935148	43936421	1274	DEL	4	15	8	0	0	1	5	1	0	0
CNVR_1672	10	44020474	44022784	2311	DEL	4	11	0	0	1	2	1	6	1	0
CNVR_1673	10	44065750	44205215	139466	DEL	2	44	10	0	10	5	8	7	1	3
CNVR_1674	10	44066444	44068000	1557	DEL	3	90	24	0	23	10	16	10	4	3
CNVR_1675	10	44204751	44207250	2500	DEL	3	14	0	0	0	7	0	4	3	0
CNVR_1676	10	44259931	44275579	15649	DEL	3	1	0	0	0	0	1	0	0	0
CNVR_1677	10	44263621	44265926	2306	DEL	4	149	25	1	25	36	24	24	11	3
CNVR_1678	10	44399001	44403000	4000	DEL	3	43	2	2	1	24	1	8	5	0
CNVR_1679	10	44619414	44619892	479	DEL	2	1	0	0	0	0	0	1	0	0
CNVR_1680	10	44655875	44656551	677	DEL	4	45	4	0	8	9	6	13	4	1
CNVR_1681	10	45542961	45544272	1312	DEL	3	61	12	0	15	9	8	11	3	3
CNVR_1682	10	46047958	46311228	263271	DEL	2	1	0	0	0	0	1	0	0	0
CNVR_1683	10	46247626	46248133	508	DEL	2	2	1	0	0	0	1	0	0	0
CNVR_1684	10	46583559	46584481	923	DEL	3	45	13	0	7	19	2	0	2	2
CNVR_1685	10	46666514	46667277	764	DEL	3	4	0	0	2	0	0	0	0	2
CNVR_1686	10	46689686	46689906	221	DEL	2	1	0	0	0	1	0	0	0	0
CNVR_1687	10	46725247	46725854	608	DEL	2	1	0	0	0	0	1	0	0	0
CNVR_1688	10	46725273	46725688	416	DEL	2	3	0	0	0	2	0	0	1	0
CNVR_1689	10	47069451	47070069	619	DEL	2	1	0	0	0	0	0	1	0	0
CNVR_1690	10	47241958	47243468	1511	DEL	3	3	2	0	0	0	1	0	0	0
CNVR_1691	10	47482458	47482966	509	DEL	2	2	0	0	0	1	0	0	1	0
CNVR_1692	10	47744506	47745554	1049	DEL	2	21	0	1	0	10	2	3	5	0
CNVR_1693	10	47801867	47804061	2195	DEL	2	1	0	0	0	0	0	1	0	0
CNVR_1694	10	47997861	47998636	776	DEL	3	12	1	0	6	0	4	0	0	1
CNVR_1695	10	48197247	48197934	688	DEL	3	21	4	1	5	1	5	2	3	0
CNVR_1696	10	48197364	48197926	563	DEL	3	15	2	0	6	0	4	1	2	0
CNVR_1697	10	48450673	48455000	4328	DEL	3	1	0	0	0	0	0	1	0	0
CNVR_1698	10	48861001	48863590	2590	DEL	3	39	9	0	10	0	10	6	3	1
CNVR_1699	10	49598139	49599008	870	DEL	2	30	10	0	7	4	6	0	2	1
CNVR_1700	10	49847174	49848300	1127	DEL	3	1	0	0	0	1	0	0	0	0
CNVR_1701	10	50252251	50255000	2750	DEL	3	4	0	0	0	3	0	1	0	0
CNVR_1702	10	50286001	50288750	2750	DEL	3	29	1	0	3	14	1	7	3	0
CNVR_1703	10	50374737	50375403	667	DEL	3	19	2	0	11	0	0	6	0	0
CNVR_1704	10	50838164	50849695	11532	DEL	2	1	0	0	0	0	0	1	0	0
CNVR_1705	10	50980232	51482264	502033	DEL	2	58	17	0	15	6	12	4	2	2
CNVR_1706	10	51412833	51413487	655	DEL	2	1	0	0	0	0	0	1	0	0
CNVR_1707	10	51579200	51645796	66597	DEL	2	12	5	0	3	3	0	0	0	1
CNVR_1708	10	51977501	51978957	1457	DEL	4	142	24	0	25	38	21	20	11	3
CNVR_1709	10	52145706	52146637	932	DEL	2	6	0	0	4	0	1	1	0	0
CNVR_1710	10	52818067	52818260	194	DEL	2	1	0	0	0	1	0	0	0	0
CNVR_1711	10	53032441	53033068	628	DEL	2	1	0	0	0	0	0	1	0	0
CNVR_1712	10	53158201	53158932	732	DEL	3	25	1	0	4	6	6	4	3	1
CNVR_1713	10	53158226	53158990	765	DEL	2	6	0	0	0	1	3	1	1	0
CNVR_1714	10	53254269	53254611	343	DEL	2	1	0	0	0	1	0	0	0	0
CNVR_1715	10	53356501	53360100	3600	DEL	4	60	7	1	9	10	18	9	4	2
CNVR_1716	10	53670501	53672353	1853	DEL	3	6	0	0	1	0	2	3	0	0
CNVR_1717	10	53876132	53930178	54047	DEL	3	49	7	1	6	9	9	7	9	1
CNVR_1718	10	53955111	53955987	877	DEL	3	149	24	0	25	37	27	21	12	3
CNVR_1719	10	54168118	54168878	761	DEL	3	51	10	0	9	6	7	14	5	0
CNVR_1720	10	54454348	54454506	159	DEL	2	1	0	0	0	1	0	0	0	0
CNVR_1721	10	55054669	55056070	1402	DEL	2	2	0	0	0	2	0	0	0	0
CNVR_1722	10	55335948	55336612	665	DEL	2	2	0	0	1	0	0	0	0	1
CNVR_1723	10	55371029	55371537	509	DEL	3	3	2	0	0	0	1	0	0	0
CNVR_1724	10	55383301	55384717	1417	DEL	3	34	8	0	9	7	8	1	1	0
CNVR_1725	10	55421608	55423125	1518	DEL	2	12	0	0	0	8	1	3	0	0
CNVR_1726	10	55580701	55591200	10500	DEL	4	26	13	0	7	2	4	0	0	0
CNVR_1727	10	55640701	55649400	8700	DEL	3	17	6	0	5	0	4	1	0	1
CNVR_1728	10	55725751	55727603	1853	DEL	4	58	15	0	18	3	7	7	7	1
CNVR_1729	10	55923463	55925374	1912	DEL	3	28	8	0	2	3	11	3	1	0
CNVR_1730	10	55948251	55950068	1818	DEL	3	13	4	0	4	1	1	1	0	2
CNVR_1731	10	55973761	55974593	833	DEL	2	14	5	0	7	0	2	0	0	0
CNVR_1732	10	56016629	56017483	855	DEL	3	28	9	0	8	0	6	4	0	1
CNVR_1733	10	56016818	56017483	666	DEL	3	17	4	0	7	1	2	2	0	1
CNVR_1734	10	56107709	56110617	2909	DUP	2	4	0	0	0	0	4	0	0	0
CNVR_1735	10	56117271	56118500	1230	DEL	3	42	4	0	13	4	5	9	4	3
CNVR_1736	10	56179726	56181600	1875	DEL	4	46	16	0	14	0	10	5	0	1
CNVR_1737	10	56300178	56645841	345664	DEL	3	9	0	0	0	0	8	1	0	0
CNVR_1738	10	56467366	56469000	1635	DEL	3	27	1	0	0	12	1	6	7	0
CNVR_1739	10	56468543	56473060	4518	DEL	2	76	15	0	21	9	16	10	2	3
CNVR_1740	10	56477825	56479310	1486	DEL	2	1	0	1	0	0	0	0	0	0
CNVR_1741	10	56478818	56480271	1454	DEL	2	1	0	0	0	0	0	0	1	0
CNVR_1742	10	56511723	56512788	1066	DEL	3	5	3	0	1	0	0	1	0	0
CNVR_1743	10	56562683	56565224	2542	DUP	2	2	0	0	1	1	0	0	0	0
CNVR_1744	10	56588964	56590801	1838	DEL	2	1	1	0	0	0	0	0	0	0
CNVR_1745	10	56606164	56608080	1917	DEL	4	127	24	0	24	29	22	12	13	3
CNVR_1746	10	56671558	56672165	608	DEL	2	4	0	0	0	1	1	2	0	0
CNVR_1747	10	56933505	56937815	4311	DEL	2	4	2	0	1	0	0	0	0	1
CNVR_1748	10	57234386	57235885	1500	DEL	3	7	1	0	4	0	0	1	0	1
CNVR_1749	10	57290695	57291929	1235	DEL	2	2	2	0	0	0	0	0	0	0
CNVR_1750	10	57432393	57435711	3319	DEL	2	1	1	0	0	0	0	0	0	0
CNVR_1751	10	57470886	57471774	889	DEL	3	2	0	0	2	0	0	0	0	0
CNVR_1752	10	57545970	57548500	2531	DEL	3	9	0	0	0	7	0	1	1	0
CNVR_1753	10	57590460	57591514	1055	DEL	3	107	21	1	25	17	16	16	9	2
CNVR_1754	10	57966510	57967258	749	DEL	3	7	0	0	0	3	3	0	1	0
CNVR_1755	10	58205799	58206379	581	DEL	3	1	0	0	0	0	1	0	0	0
CNVR_1756	10	58885221	58888012	2792	DEL	2	1	0	0	0	0	0	1	0	0
CNVR_1757	10	58886758	58887227	470	DEL	2	1	0	0	0	0	0	1	0	0
CNVR_1758	10	59267860	59268612	753	DEL	2	41	6	0	8	7	8	6	3	3
CNVR_1759	10	59285609	59286813	1205	DEL	2	1	0	0	0	0	0	0	0	1
CNVR_1760	10	59293300	59386923	93624	DEL	2	1	0	0	0	0	0	0	0	1
CNVR_1761	10	59373657	59468423	94767	DEL	2	7	2	0	2	0	3	0	0	0
CNVR_1762	10	59477251	59536355	59105	CNV	2	5	1	0	0	0	1	3	0	0
CNVR_1763	10	59487209	59509479	22271	DEL	2	1	1	0	0	0	0	0	0	0
CNVR_1764	10	59498101	59534940	36840	DUP	2	3	2	0	0	0	0	1	0	0
CNVR_1765	10	59509713	59526051	16339	DUP	2	8	0	0	0	0	8	0	0	0
CNVR_1766	10	59757288	59758183	896	DEL	3	10	6	0	0	1	0	2	0	1
CNVR_1767	10	59941867	59942258	392	DEL	2	3	0	0	0	1	1	0	1	0
CNVR_1768	10	60014477	60016043	1567	DEL	3	26	5	0	8	3	7	1	0	2
CNVR_1769	10	60372968	60680380	307413	DEL	2	2	0	0	1	1	0	0	0	0
CNVR_1770	10	60728164	60729144	981	DEL	3	86	11	0	18	23	10	13	9	2
CNVR_1771	10	60789097	60789300	204	DEL	2	1	0	0	0	1	0	0	0	0
CNVR_1772	10	61085195	61085702	508	DEL	2	1	0	0	0	0	1	0	0	0
CNVR_1773	10	61085318	61085640	323	DEL	2	6	0	0	0	4	1	0	1	0
CNVR_1774	10	61250186	61251691	1506	DEL	3	76	8	1	12	16	20	7	12	0
CNVR_1775	10	61424100	61478707	54608	DEL	2	1	0	0	0	0	1	0	0	0
CNVR_1776	10	62253898	62255953	2056	DEL	4	30	4	0	4	2	16	1	2	1
CNVR_1777	10	62619251	62622141	2891	DEL	3	2	1	0	0	0	0	1	0	0
CNVR_1778	10	62695001	62701000	6000	DEL	4	8	0	0	3	5	0	0	0	0
CNVR_1779	10	63168120	63169351	1232	DEL	4	82	19	0	11	17	11	15	6	3
CNVR_1780	10	63203657	63204316	660	DEL	2	15	0	0	3	7	3	0	1	1
CNVR_1781	10	63203838	63204273	436	DEL	2	1	0	0	0	1	0	0	0	0
CNVR_1782	10	63526523	63527697	1175	DEL	3	2	0	0	0	1	1	0	0	0
CNVR_1783	10	63818398	63821045	2648	DEL	2	10	3	0	2	0	2	3	0	0
CNVR_1784	10	63873325	63873633	309	DEL	2	1	0	0	0	1	0	0	0	0
CNVR_1785	10	63932636	63951943	19308	DUP	2	2	1	0	0	0	1	0	0	0
CNVR_1786	10	63935501	63938312	2812	DEL	3	145	22	1	23	43	22	16	15	3
CNVR_1787	10	64011291	64012258	968	DEL	2	4	0	0	1	1	1	0	0	1
CNVR_1788	10	64167180	64169152	1973	DEL	2	1	0	0	0	1	0	0	0	0
CNVR_1789	10	64353601	64374600	21000	DEL	4	2	2	0	0	0	0	0	0	0
CNVR_1790	10	64466001	64475818	9818	DEL	3	4	0	0	0	1	0	3	0	0
CNVR_1791	10	64469472	64471412	1941	DEL	2	10	5	0	4	0	1	0	0	0
CNVR_1792	10	64503001	64504750	1750	DEL	2	1	0	0	0	0	0	0	1	0
CNVR_1793	10	64537715	64537913	199	DEL	2	2	0	0	0	2	0	0	0	0
CNVR_1794	10	64667939	64669446	1508	DEL	3	31	5	0	13	5	5	3	0	0
CNVR_1795	10	64671596	64672673	1078	DEL	3	101	23	2	25	12	24	12	1	2
CNVR_1796	10	64997501	65007750	10250	DEL	3	118	19	1	24	24	16	20	11	3
CNVR_1797	10	65251051	65257185	6135	DEL	3	92	20	0	9	31	11	16	4	1
CNVR_1798	10	65651976	65653233	1258	DEL	2	26	4	0	5	7	2	8	0	0
CNVR_1799	10	65686459	65687536	1078	DEL	3	42	12	0	9	2	11	8	0	0
CNVR_1800	10	66087282	66164786	77505	DEL	3	51	10	0	12	9	8	5	6	1
CNVR_1801	10	66177001	66183092	6092	DUP	2	1	0	0	1	0	0	0	0	0
CNVR_1802	10	66253936	66259000	5065	DEL	4	10	0	0	7	0	0	2	1	0
CNVR_1803	10	66349491	66351369	1879	DEL	3	110	21	2	21	27	13	13	10	3
CNVR_1804	10	66456251	66459000	2750	DUP	2	1	1	0	0	0	0	0	0	0
CNVR_1805	10	67037709	67040789	3081	DEL	4	135	24	2	24	24	21	23	14	3
CNVR_1806	10	67080811	67082128	1318	DEL	3	18	8	0	1	0	4	2	2	1
CNVR_1807	10	67358270	67358747	478	DEL	2	11	1	0	2	6	0	1	1	0
CNVR_1808	10	67592859	67593467	609	DEL	3	9	0	0	0	5	0	4	0	0
CNVR_1809	10	67632274	67633769	1496	DEL	4	54	4	0	18	12	14	3	0	3
CNVR_1810	10	67652335	67652483	149	DEL	2	1	0	0	0	1	0	0	0	0
CNVR_1811	10	68153397	68154178	782	DEL	3	2	0	0	0	0	1	0	0	1
CNVR_1812	10	68518145	68518897	753	DEL	2	1	0	0	1	0	0	0	0	0
CNVR_1813	10	68518360	68518803	444	DEL	2	2	0	0	1	0	0	1	0	0
CNVR_1814	10	68783403	68784516	1114	DEL	2	5	4	0	0	0	1	0	0	0
CNVR_1815	10	68788380	68789235	856	DEL	2	22	6	0	9	0	5	0	0	2
CNVR_1816	10	69598203	69599054	852	DEL	3	101	22	0	22	21	12	14	7	3
CNVR_1817	10	70012179	70014416	2238	DEL	3	52	12	0	19	1	13	3	1	3
CNVR_1818	10	70087203	70087580	378	DEL	2	4	1	0	0	0	1	1	1	0
CNVR_1819	10	71640848	71642200	1353	DEL	2	13	1	0	4	0	5	1	0	2
CNVR_1820	10	71682177	71683301	1125	DEL	2	1	0	0	1	0	0	0	0	0
CNVR_1821	10	72232177	72232566	390	DEL	2	2	0	0	0	1	1	0	0	0
CNVR_1822	10	74221282	74226000	4719	DEL	3	1	0	0	0	0	0	1	0	0
CNVR_1823	10	74297585	74298246	662	DEL	2	19	4	0	2	5	2	3	2	1
CNVR_1824	10	74297684	74298140	457	DEL	2	3	0	0	1	1	1	0	0	0
CNVR_1825	10	74387211	74389073	1863	DEL	4	46	14	0	8	6	7	6	3	2
CNVR_1826	10	74392481	74393341	861	DEL	3	8	0	0	3	0	1	4	0	0
CNVR_1827	10	74413653	74414144	492	DEL	2	16	0	0	1	4	3	4	4	0
CNVR_1828	10	74413692	74414108	417	DEL	2	17	1	0	1	6	2	4	3	0
CNVR_1829	10	74446978	74447791	814	DEL	3	7	2	0	2	0	3	0	0	0
CNVR_1830	10	74550777	75107674	556898	DEL	2	3	0	0	0	1	0	1	1	0
CNVR_1831	10	74804394	74804746	353	DEL	2	5	0	0	0	1	0	2	2	0
CNVR_1832	10	74804499	74804739	241	DEL	2	1	0	0	0	0	0	0	1	0
CNVR_1833	10	74823204	74823680	477	DEL	2	3	1	0	0	1	0	1	0	0
CNVR_1834	10	74823338	74823707	370	DEL	2	11	0	0	0	2	2	3	4	0
CNVR_1835	10	75044864	75045187	324	DEL	2	5	0	0	1	3	1	0	0	0
CNVR_1836	10	75044883	75045298	416	DEL	2	1	1	0	0	0	0	0	0	0
CNVR_1837	10	75173494	75175295	1802	DEL	3	2	0	0	0	1	0	0	1	0
CNVR_1838	10	75289541	75289948	408	DEL	2	4	1	0	0	0	1	2	0	0
CNVR_1839	10	75932142	75932625	484	DEL	2	1	0	0	0	0	0	1	0	0
CNVR_1840	10	76486948	76488250	1303	DEL	3	11	1	0	2	3	0	5	0	0
CNVR_1841	10	76732689	76732869	181	DEL	2	2	0	0	0	2	0	0	0	0
CNVR_1842	10	76949733	76951173	1441	DEL	3	8	0	0	3	0	5	0	0	0
CNVR_1843	10	77042894	77044072	1179	DEL	3	103	21	0	23	23	19	8	7	2
CNVR_1844	10	77133894	77134959	1066	DEL	2	21	5	0	10	0	4	0	0	2
CNVR_1845	10	77134120	77134800	681	DEL	2	1	1	0	0	0	0	0	0	0
CNVR_1846	10	77515661	77517005	1345	DEL	2	2	0	0	0	1	1	0	0	0
CNVR_1847	10	77562501	77563863	1363	DEL	3	14	0	0	2	6	0	5	1	0
CNVR_1848	10	77598898	77599487	590	DEL	2	3	0	0	0	0	3	0	0	0
CNVR_1849	10	77605801	77628300	22500	DEL	4	8	5	0	2	1	0	0	0	0
CNVR_1850	10	77818743	77819968	1226	DEL	3	18	7	0	6	0	4	0	0	1
CNVR_1851	10	77887047	77887588	542	DEL	2	1	0	0	0	0	0	1	0	0
CNVR_1852	10	78072947	78076027	3081	DEL	3	10	1	0	4	0	3	0	0	2
CNVR_1853	10	78397414	78397743	330	DEL	2	3	0	0	0	3	0	0	0	0
CNVR_1854	10	78760070	78760771	702	DEL	2	1	0	0	0	0	0	0	1	0
CNVR_1855	10	78877501	78906183	28683	DUP	2	9	0	0	0	9	0	0	0	0
CNVR_1856	10	79398335	79398516	182	DEL	2	1	0	0	0	1	0	0	0	0
CNVR_1857	10	80007601	80008918	1318	DEL	3	1	0	0	1	0	0	0	0	0
CNVR_1858	10	80376340	80379098	2759	DEL	2	1	0	0	0	0	1	0	0	0
CNVR_1859	10	80775501	80782250	6750	DEL	3	2	0	0	0	0	0	2	0	0
CNVR_1860	10	80912928	80914244	1317	DEL	2	1	0	0	0	1	0	0	0	0
CNVR_1861	10	80954207	80955279	1073	DEL	3	103	24	0	25	17	17	9	8	3
CNVR_1862	10	81291402	81294712	3311	DEL	3	7	4	0	0	0	2	0	1	0
CNVR_1863	10	81505324	81505960	637	DEL	2	1	0	0	0	0	0	1	0	0
CNVR_1864	10	81508480	81512250	3771	DEL	4	32	2	0	4	17	7	0	1	1
CNVR_1865	10	81509363	81511161	1799	DEL	3	10	2	0	0	0	1	3	3	1
CNVR_1866	10	82232461	82232979	519	DEL	2	3	0	0	0	0	0	0	3	0
CNVR_1867	10	82460497	82461250	754	DEL	2	1	0	0	1	0	0	0	0	0
CNVR_1868	10	82620283	82621004	722	DEL	2	1	0	0	1	0	0	0	0	0
CNVR_1869	10	82622931	82623582	652	DEL	2	1	0	0	0	0	0	1	0	0
CNVR_1870	10	83100887	83101158	272	DEL	2	3	0	0	0	3	0	0	0	0
CNVR_1871	10	83593517	83594475	959	DEL	3	7	0	0	1	2	3	0	0	1
CNVR_1872	10	83825428	83826119	692	DEL	2	5	0	0	0	2	1	2	0	0
CNVR_1873	10	83825576	83826063	488	DEL	2	3	2	0	0	1	0	0	0	0
CNVR_1874	10	83905340	83906039	700	DEL	3	5	0	0	5	0	0	0	0	0
CNVR_1875	10	84188778	84192000	3223	DEL	3	60	0	2	2	33	0	13	10	0
CNVR_1876	10	84279222	84279592	371	DEL	2	2	0	0	0	0	0	2	0	0
CNVR_1877	10	84341037	84342805	1769	DEL	2	40	8	0	14	2	6	7	1	2
CNVR_1878	10	84709619	84712234	2616	DEL	2	1	0	0	1	0	0	0	0	0
CNVR_1879	10	84711187	84713510	2324	DEL	2	7	2	0	3	0	2	0	0	0
CNVR_1880	10	84810413	84811657	1245	DEL	2	1	1	0	0	0	0	0	0	0
CNVR_1881	10	84946388	84947134	747	DEL	2	2	1	0	0	1	0	0	0	0
CNVR_1882	10	85376871	85378200	1330	DEL	3	14	2	0	7	0	3	1	0	1
CNVR_1883	10	85398836	85400329	1494	DEL	4	89	20	1	15	12	20	12	8	1
CNVR_1884	10	85403087	85404750	1664	DEL	3	86	18	0	14	19	15	12	6	2
CNVR_1885	10	85422657	85424566	1910	DEL	4	94	17	0	15	15	15	20	11	1
CNVR_1886	10	85437187	85437701	515	DEL	2	2	0	0	0	0	0	2	0	0
CNVR_1887	10	85475774	85476245	472	DEL	2	8	1	0	0	3	1	1	2	0
CNVR_1888	10	85510900	85512383	1484	DEL	3	2	0	0	0	0	0	2	0	0
CNVR_1889	10	86515281	86516013	733	DEL	2	2	0	0	0	0	0	2	0	0
CNVR_1890	10	86556501	86557388	888	DEL	3	2	0	0	1	0	0	0	1	0
CNVR_1891	10	86974055	86975750	1696	DEL	4	43	5	1	14	15	2	2	1	3
CNVR_1892	10	87180751	87207500	26750	DEL	2	2	2	0	0	0	0	0	0	0
CNVR_1893	10	87169156	87898530	729375	DEL	3	4	0	0	1	0	0	3	0	0
CNVR_1894	10	87373836	87374723	888	DEL	3	7	1	0	2	2	1	0	1	0
CNVR_1895	10	87542572	87543076	505	DEL	3	2	0	0	0	1	1	0	0	0
CNVR_1896	10	87594968	87608702	13735	DEL	2	26	9	0	10	0	3	2	0	2
CNVR_1897	10	88182640	88183944	1305	DEL	3	31	4	0	12	7	4	0	3	1
CNVR_1898	10	88413083	88415519	2437	DEL	4	2	0	0	1	0	0	1	0	0
CNVR_1899	10	88424680	88425919	1240	DEL	4	99	23	0	22	21	13	12	5	3
CNVR_1900	10	88733312	88860370	127059	DEL	3	16	4	0	3	2	3	1	2	1
CNVR_1901	10	88881534	88882851	1318	DEL	2	1	0	0	0	0	0	1	0	0
CNVR_1902	10	89209218	89210609	1392	DEL	2	23	16	0	2	1	1	2	0	1
CNVR_1903	10	89606663	89607024	362	DEL	2	4	1	0	0	2	0	1	0	0
CNVR_1904	10	89894840	89895860	1021	DEL	3	2	2	0	0	0	0	0	0	0
CNVR_1905	10	89965494	89966060	567	DEL	2	1	0	0	0	0	0	1	0	0
CNVR_1906	10	90238096	90238891	796	DEL	2	4	0	0	3	0	1	0	0	0
CNVR_1907	10	90253576	90259382	5807	DEL	2	2	0	0	2	0	0	0	0	0
CNVR_1908	10	90520261	90935190	414930	DEL	2	16	5	0	8	0	1	0	0	2
CNVR_1909	10	90591702	90596000	4299	DEL	4	8	1	0	0	5	0	0	0	2
CNVR_1910	10	90621846	90622452	607	DEL	2	8	2	0	1	2	1	1	1	0
CNVR_1911	10	90621918	90622452	535	DEL	2	10	1	0	0	3	2	1	2	1
CNVR_1912	10	90678501	90687900	9400	DEL	3	4	0	0	1	1	1	1	0	0
CNVR_1913	10	90890767	90891597	831	DEL	3	2	0	0	0	0	0	2	0	0
CNVR_1914	10	91037501	91039750	2250	DEL	3	105	10	2	17	32	9	17	16	2
CNVR_1915	10	91242616	91243557	942	DEL	2	2	1	0	0	0	1	0	0	0
CNVR_1916	10	91345132	91345835	704	DEL	2	5	0	0	0	1	0	2	2	0
CNVR_1917	10	91473625	91533340	59716	DEL	2	1	0	0	0	1	0	0	0	0
CNVR_1918	10	91532548	91533425	878	DEL	2	6	0	0	1	0	4	0	0	1
CNVR_1919	10	91563451	91564049	599	DEL	2	2	1	0	0	0	1	0	0	0
CNVR_1920	10	91578761	91579301	541	DEL	2	4	0	0	1	2	0	1	0	0
CNVR_1921	10	91610404	91611144	741	DEL	2	7	2	0	2	1	1	1	0	0
CNVR_1922	10	91610489	91610951	463	DEL	2	1	1	0	0	0	0	0	0	0
CNVR_1923	10	91776959	91777429	471	DEL	3	2	0	0	1	1	0	0	0	0
CNVR_1924	10	91800159	91800465	307	DEL	2	2	0	0	0	2	0	0	0	0
CNVR_1925	10	91916174	91917254	1081	DEL	3	95	23	0	19	9	20	17	5	2
CNVR_1926	10	91989648	91990437	790	DEL	2	38	10	0	6	4	9	6	1	2
CNVR_1927	10	91989789	91990437	649	DEL	2	18	5	0	0	2	5	5	0	1
CNVR_1928	10	91990638	91991602	965	DEL	2	2	1	0	1	0	0	0	0	0
CNVR_1929	10	91992581	91993511	931	DEL	2	27	8	0	8	0	6	2	0	3
CNVR_1930	10	92086406	92087502	1097	DEL	2	1	0	0	0	1	0	0	0	0
CNVR_1931	10	92272251	92274013	1763	DEL	3	79	21	0	22	10	15	7	1	3
CNVR_1932	10	92577277	93516304	939028	DEL	2	1	0	0	0	1	0	0	0	0
CNVR_1933	10	92692903	92694750	1848	DEL	4	19	4	0	9	1	3	2	0	0
CNVR_1934	10	93303151	93304586	1436	DEL	2	9	1	0	4	0	3	0	0	1
CNVR_1935	10	93468901	93474919	6019	DEL	4	48	13	0	10	2	10	7	4	2
CNVR_1936	10	93993001	94005391	12391	DUP	2	1	0	0	0	0	0	0	0	1
CNVR_1937	10	94161809	94162001	193	DEL	2	1	0	0	0	1	0	0	0	0
CNVR_1938	10	94237011	94238639	1629	DEL	3	17	3	0	8	0	4	0	2	0
CNVR_1939	10	94253826	94255841	2016	DEL	2	2	2	0	0	0	0	0	0	0
CNVR_1940	10	94314438	94315357	920	DEL	3	22	7	0	7	1	4	2	1	0
CNVR_1941	10	94314664	94315330	667	DEL	3	37	9	0	9	3	9	5	0	2
CNVR_1942	10	94409782	94410493	712	DEL	2	1	0	0	1	0	0	0	0	0
CNVR_1943	10	94457251	94460584	3334	DEL	3	11	0	0	1	8	0	2	0	0
CNVR_1944	10	94600955	94601719	765	DEL	2	1	0	0	1	0	0	0	0	0
CNVR_1945	10	94651165	94651760	596	DEL	2	1	0	0	0	0	0	1	0	0
CNVR_1946	10	94669382	94670350	969	DEL	2	19	4	0	6	0	6	1	0	2
CNVR_1947	10	94840501	94847000	6500	DEL	3	20	0	0	0	13	0	5	2	0
CNVR_1948	10	94886118	94887416	1299	DEL	3	20	0	0	8	5	3	1	1	2
CNVR_1949	10	94911953	94993918	81966	DEL	2	2	1	0	0	0	1	0	0	0
CNVR_1950	10	95014705	95016678	1974	DEL	4	28	10	0	6	6	5	1	0	0
CNVR_1951	10	95267958	95269443	1486	DEL	3	62	14	0	18	11	11	6	1	1
CNVR_1952	10	95304751	95306543	1793	DEL	4	67	17	1	15	16	9	3	3	3
CNVR_1953	10	95326379	95326975	597	DEL	2	1	1	0	0	0	0	0	0	0
CNVR_1954	10	95350587	95353367	2781	DEL	3	13	0	0	9	0	2	1	0	1
CNVR_1955	10	95662673	95664600	1928	DEL	3	68	21	0	22	2	11	7	2	3
CNVR_1956	10	95665085	95666128	1044	DEL	2	1	0	0	1	0	0	0	0	0
CNVR_1957	10	95666934	95677292	10359	DEL	2	1	0	0	0	0	0	0	0	1
CNVR_1958	10	95807319	95807916	598	DEL	2	1	0	0	0	0	0	0	0	1
CNVR_1959	10	95882069	95882804	736	DEL	2	1	0	0	0	0	0	1	0	0
CNVR_1960	10	96038245	96039225	981	DEL	2	5	1	0	0	2	0	0	1	1
CNVR_1961	10	96112622	96113578	957	DEL	3	94	20	0	21	15	17	13	5	3
CNVR_1962	10	96163453	96164288	836	DEL	2	48	12	0	10	7	7	9	1	2
CNVR_1963	10	96310456	96313598	3143	DEL	4	162	24	0	25	47	23	24	16	3
CNVR_1964	10	96343490	96349000	5511	DEL	2	1	0	0	0	1	0	0	0	0
CNVR_1965	10	96400732	96439015	38284	DEL	3	1	0	0	0	0	0	0	1	0
CNVR_1966	10	96447463	96453957	6495	DEL	2	4	0	0	2	0	1	1	0	0
CNVR_1967	10	96494555	96495240	686	DEL	3	5	2	0	3	0	0	0	0	0
CNVR_1968	10	96531792	96531987	196	DEL	2	2	0	0	0	2	0	0	0	0
CNVR_1969	10	96656306	96657861	1556	DEL	2	1	0	0	0	0	1	0	0	0
CNVR_1970	10	96939751	96952500	12750	DEL	3	1	0	0	0	0	0	1	0	0
CNVR_1971	10	97945509	97946439	931	DEL	2	28	8	0	11	0	5	2	0	2
CNVR_1972	10	98154995	98155638	644	DEL	2	1	0	0	0	0	0	1	0	0
CNVR_1973	10	98210552	98212135	1584	DEL	3	104	17	2	21	32	14	5	10	3
CNVR_1974	10	98396035	98396706	672	DEL	2	2	1	0	0	1	0	0	0	0
CNVR_1975	10	98781856	98784583	2728	DEL	2	2	0	0	0	2	0	0	0	0
CNVR_1976	10	98969924	98971265	1342	DEL	3	2	0	0	0	0	0	2	0	0
CNVR_1977	10	99080251	99087000	6750	DUP	2	1	0	0	1	0	0	0	0	0
CNVR_1978	10	99206401	99207401	1001	DEL	3	7	2	0	0	0	2	1	2	0
CNVR_1979	10	99449814	99450841	1028	DEL	3	68	21	0	17	8	16	4	2	0
CNVR_1980	10	99547887	99549613	1727	DEL	3	52	16	0	12	3	12	6	1	2
CNVR_1981	10	99604175	99606600	2426	DEL	4	59	8	1	15	9	7	14	2	3
CNVR_1982	10	99975730	99976126	397	DUP	2	1	0	0	0	0	1	0	0	0
CNVR_1983	10	100110263	100110456	194	DEL	2	1	0	0	0	1	0	0	0	0
CNVR_1984	10	100146252	100147201	950	DEL	2	1	0	0	0	1	0	0	0	0
CNVR_1985	10	100197121	100197887	767	DEL	2	6	1	0	2	1	0	1	0	1
CNVR_1986	10	100197328	100197887	560	DEL	2	10	3	0	3	2	1	1	0	0
CNVR_1987	10	100197363	100197785	423	DEL	3	20	3	0	3	6	2	3	2	1
CNVR_1988	10	100232067	100236300	4234	DUP	2	1	0	0	1	0	0	0	0	0
CNVR_1989	10	100285560	100286258	699	DEL	3	97	21	1	11	22	21	10	9	2
CNVR_1990	10	100331762	100332183	422	DEL	2	1	0	0	0	1	0	0	0	0
CNVR_1991	10	101159881	101161589	1709	DEL	4	53	10	0	18	3	10	8	1	3
CNVR_1992	10	101229777	101231627	1851	DEL	2	3	1	0	1	0	0	1	0	0
CNVR_1993	10	101238234	101239012	779	DEL	2	17	6	0	3	3	3	2	0	0
CNVR_1994	10	101238329	101239012	684	DEL	2	25	7	0	5	5	6	2	0	0
CNVR_1995	10	101238347	101238926	580	DEL	2	10	1	0	1	2	5	1	0	0
CNVR_1996	10	101341176	101644334	303159	DEL	2	2	0	0	0	2	0	0	0	0
CNVR_1997	10	101352946	101443367	90422	DEL	2	2	0	0	0	0	0	0	2	0
CNVR_1998	10	101852093	101853280	1188	DEL	2	2	0	0	2	0	0	0	0	0
[truncated: 17,080 more rows]
