# Supplementary material for: Identification of copy number variation in French dairy and beef breeds using next-generation sequencing
Source: Genet Sel Evol. 2017 Oct 24;49:77. doi: 10.1186/s12711-017-0352-z (PMC5655909; doi:10.1186/s12711-017-0352-z)
Supplement: Supplementary file 4 — Additional file 4: Table S3. Variants validated by the Mendelian approach. This table provides details on validated variants using the Mendelian approach and the number of trios, duos or parents with several sons that support the variant. [file 12711_2017_352_MOESM4_ESM.xlsx]

## Sheet: Table S3
Additional File 4 Table S3 Variants validated by the mendelian approach
CNVR_ID	CNVR_type	# trios	# duos	# sire with several sons
CNVR_2	DEL	2	2	1
CNVR_5	DEL	0	1	0
CNVR_10	DEL	2	3	1
CNVR_13	DEL	1	0	0
CNVR_15	DEL	0	1	0
CNVR_21	DEL	2	0	1
CNVR_23	DEL	0	1	0
CNVR_26	DEL	0	1	0
CNVR_27	CNV	0	2	0
CNVR_28	DEL	0	1	0
CNVR_29	DEL	0	1	0
CNVR_31	DEL	1	1	1
CNVR_34	DEL	0	1	0
CNVR_49	DEL	1	0	0
CNVR_51	DEL	2	0	1
CNVR_64	DEL	0	2	0
CNVR_68	DEL	0	1	0
CNVR_71	DEL	2	6	1
CNVR_83	DEL	0	1	0
CNVR_85	DEL	0	1	0
CNVR_87	DEL	1	1	0
CNVR_88	DEL	1	0	0
CNVR_91	DEL	0	1	0
CNVR_95	DEL	2	0	1
CNVR_96	DEL	0	2	0
CNVR_104	DEL	2	0	1
CNVR_105	DEL	0	1	0
CNVR_108	DEL	0	1	0
CNVR_109	DEL	0	1	0
CNVR_113	DEL	1	0	0
CNVR_116	DEL	1	1	0
CNVR_117	DEL	2	1	1
CNVR_118	DEL	0	1	0
CNVR_124	DEL	1	1	1
CNVR_125	DEL	1	1	1
CNVR_126	DEL	1	2	1
CNVR_129	DEL	0	1	0
CNVR_135	DEL	2	0	1
CNVR_138	DEL	2	4	1
CNVR_145	DEL	1	0	0
CNVR_149	DEL	0	1	0
CNVR_172	DEL	0	1	0
CNVR_175	DEL	0	3	0
CNVR_186	DEL	0	2	0
CNVR_189	DEL	0	2	1
CNVR_197	DEL	0	1	0
CNVR_199	DEL	0	1	0
CNVR_203	DEL	0	4	0
CNVR_216	DEL	0	9	1
CNVR_220	DEL	0	1	0
CNVR_222	DEL	1	3	1
CNVR_227	DEL	2	1	1
CNVR_228	DEL	0	2	0
CNVR_229	DEL	0	1	0
CNVR_234	DEL	0	1	0
CNVR_236	DEL	0	2	0
CNVR_240	DEL	0	1	0
CNVR_250	DEL	1	2	0
CNVR_274	DEL	0	2	1
CNVR_285	DEL	0	1	0
CNVR_286	DEL	0	2	0
CNVR_287	DEL	0	1	0
CNVR_291	DEL	2	1	1
CNVR_297	DEL	0	1	0
CNVR_299	DEL	1	0	0
CNVR_301	DEL	1	1	0
CNVR_304	DEL	0	3	0
CNVR_311	DEL	2	2	1
CNVR_313	DEL	2	1	1
CNVR_319	DEL	1	0	0
CNVR_324	DEL	1	3	0
CNVR_327	DEL	0	1	0
CNVR_328	DEL	2	5	1
CNVR_329	DEL	2	0	1
CNVR_336	DEL	0	4	0
CNVR_339	DEL	2	6	2
CNVR_340	DEL	0	1	0
CNVR_355	DEL	0	1	0
CNVR_358	DEL	2	0	1
CNVR_372	DEL	0	2	1
CNVR_373	DEL	0	1	0
CNVR_376	DEL	1	0	0
CNVR_381	DEL	0	2	0
CNVR_382	DEL	0	2	0
CNVR_392	DEL	1	0	0
CNVR_394	DEL	0	1	0
CNVR_395	DEL	0	1	0
CNVR_399	DEL	1	6	1
CNVR_408	DEL	2	0	1
CNVR_409	DEL	1	2	1
CNVR_411	DEL	0	2	0
CNVR_413	DEL	1	3	1
CNVR_415	DEL	0	1	0
CNVR_417	DEL	2	0	1
CNVR_426	DEL	0	1	0
CNVR_431	DEL	0	1	0
CNVR_437	DEL	2	7	2
CNVR_442	DEL	1	1	1
CNVR_444	DEL	0	1	0
CNVR_448	DEL	0	1	0
CNVR_453	DEL	2	0	1
CNVR_455	DEL	2	0	1
CNVR_456	DEL	1	1	1
CNVR_457	DEL	0	3	1
CNVR_464	DEL	2	2	1
CNVR_475	DEL	1	0	0
CNVR_477	DEL	1	9	2
CNVR_481	DEL	1	1	1
CNVR_487	DEL	0	1	0
CNVR_489	DEL	0	1	0
CNVR_491	DEL	0	2	1
CNVR_493	DEL	0	1	0
CNVR_497	DEL	0	2	0
CNVR_502	DEL	0	1	0
CNVR_504	DUP	0	2	1
CNVR_524	DEL	2	2	1
CNVR_525	DEL	0	1	0
CNVR_526	DEL	0	1	0
CNVR_539	DEL	0	1	0
CNVR_541	DEL	2	4	1
CNVR_543	DEL	0	2	0
CNVR_546	DEL	0	1	0
CNVR_549	DEL	0	1	0
CNVR_564	DEL	2	6	2
CNVR_567	DEL	0	2	0
CNVR_573	DEL	2	2	1
CNVR_578	DEL	1	0	0
CNVR_584	DEL	1	0	0
CNVR_588	DEL	0	1	0
CNVR_593	DEL	0	1	0
CNVR_594	DEL	0	1	0
CNVR_599	DEL	0	1	0
CNVR_602	DEL	0	3	1
CNVR_606	DEL	1	0	0
CNVR_607	DEL	0	3	0
CNVR_622	DEL	0	1	0
CNVR_623	DEL	0	2	0
CNVR_627	DEL	0	1	0
CNVR_628	DEL	0	1	0
CNVR_637	DEL	2	0	1
CNVR_641	DEL	0	2	0
CNVR_654	DEL	2	1	1
CNVR_655	DEL	0	2	0
CNVR_662	DEL	0	1	0
CNVR_664	DEL	0	1	0
CNVR_667	DEL	2	1	1
CNVR_670	DEL	0	4	1
CNVR_671	DEL	0	5	0
CNVR_678	DEL	0	2	1
CNVR_679	DEL	0	1	0
CNVR_681	DEL	2	0	1
CNVR_684	DEL	2	3	1
CNVR_689	DEL	1	1	0
CNVR_694	DEL	2	5	2
CNVR_696	DEL	0	2	0
CNVR_716	DEL	0	4	1
CNVR_721	DEL	0	2	0
CNVR_722	DEL	0	2	1
CNVR_724	DEL	1	2	1
CNVR_725	DEL	1	2	1
CNVR_726	DEL	2	0	1
CNVR_728	DEL	0	1	0
CNVR_729	DEL	2	6	1
CNVR_730	DEL	0	7	1
CNVR_737	DEL	0	2	1
CNVR_738	DEL	0	2	1
CNVR_739	DEL	0	1	0
CNVR_741	DEL	0	2	0
CNVR_745	DEL	0	3	0
CNVR_746	DEL	2	0	1
CNVR_748	DEL	1	3	1
CNVR_750	DEL	0	1	0
CNVR_756	DEL	1	1	0
CNVR_764	DEL	1	2	1
CNVR_765	DEL	1	4	1
CNVR_772	DEL	0	5	0
CNVR_774	DEL	0	1	0
CNVR_775	DEL	0	1	0
CNVR_777	DEL	0	2	1
CNVR_778	DEL	0	2	1
CNVR_782	DEL	1	1	0
CNVR_783	DEL	1	1	0
CNVR_784	DEL	0	1	0
CNVR_788	DEL	0	3	0
CNVR_791	DEL	0	2	1
CNVR_793	DEL	0	2	1
CNVR_795	DEL	0	2	1
CNVR_799	DEL	1	0	0
CNVR_800	DEL	2	3	1
CNVR_804	DEL	0	2	0
CNVR_820	DUP	1	1	1
CNVR_828	DEL	0	1	0
CNVR_833	DEL	1	0	0
CNVR_843	DUP	1	2	1
CNVR_846	DEL	0	1	0
CNVR_853	DEL	0	2	1
CNVR_854	DEL	0	1	0
CNVR_855	DEL	0	1	0
CNVR_858	DEL	0	2	0
CNVR_877	DEL	0	1	0
CNVR_884	DEL	0	1	0
CNVR_887	DEL	0	1	0
CNVR_888	DEL	0	6	1
CNVR_891	DEL	0	1	0
CNVR_893	DEL	0	1	0
CNVR_894	DEL	0	1	0
CNVR_899	DEL	0	1	0
CNVR_902	DEL	2	1	1
CNVR_903	DEL	2	3	1
CNVR_918	DEL	0	1	0
CNVR_930	DEL	0	1	0
CNVR_932	DEL	1	1	1
CNVR_942	DEL	0	1	0
CNVR_945	DEL	0	1	0
CNVR_946	DEL	0	1	0
CNVR_959	DEL	0	1	0
CNVR_960	DEL	0	1	0
CNVR_966	DEL	0	1	0
CNVR_972	DEL	0	2	1
CNVR_977	DEL	2	2	1
CNVR_986	DEL	0	1	0
CNVR_996	DEL	0	2	1
CNVR_1000	DEL	0	2	1
CNVR_1001	DEL	0	1	0
CNVR_1004	DEL	2	1	1
CNVR_1009	DEL	0	1	0
CNVR_1010	DEL	0	1	0
CNVR_1015	DEL	0	1	0
CNVR_1016	DEL	2	2	1
CNVR_1024	DEL	2	0	1
CNVR_1025	DEL	2	0	1
CNVR_1027	DEL	1	1	1
CNVR_1038	DEL	0	2	0
CNVR_1041	DEL	0	5	1
CNVR_1047	CNV	0	4	0
CNVR_1048	CNV	1	9	3
CNVR_1049	CNV	0	4	0
CNVR_1050	CNV	2	11	2
CNVR_1051	CNV	2	5	1
CNVR_1053	DEL	0	1	0
CNVR_1055	CNV	0	4	0
CNVR_1058	CNV	0	4	0
CNVR_1059	DEL	0	4	0
CNVR_1060	DEL	0	5	1
CNVR_1061	CNV	0	3	0
CNVR_1062	CNV	0	3	0
CNVR_1065	DEL	0	1	0
CNVR_1066	CNV	2	12	2
CNVR_1067	CNV	0	1	0
CNVR_1069	CNV	0	1	0
CNVR_1070	CNV	0	1	0
CNVR_1072	CNV	0	1	0
CNVR_1073	CNV	2	12	2
CNVR_1074	CNV	0	1	0
CNVR_1075	CNV	0	1	0
CNVR_1078	DEL	0	2	0
CNVR_1080	CNV	2	14	2
CNVR_1081	CNV	2	11	2
CNVR_1082	DEL	0	3	0
CNVR_1083	DEL	0	1	0
CNVR_1084	DEL	0	2	0
CNVR_1086	CNV	2	5	2
CNVR_1088	CNV	0	6	1
CNVR_1090	CNV	2	9	1
CNVR_1096	CNV	1	8	0
CNVR_1099	CNV	2	3	1
CNVR_1101	CNV	2	4	1
CNVR_1105	CNV	0	3	0
CNVR_1107	CNV	2	0	1
CNVR_1108	CNV	1	6	1
CNVR_1110	CNV	1	6	1
CNVR_1113	CNV	0	1	0
CNVR_1115	CNV	1	0	0
CNVR_1118	DEL	0	1	0
CNVR_1120	CNV	2	0	1
CNVR_1128	DEL	0	2	0
CNVR_1131	CNV	0	2	0
CNVR_1143	CNV	0	2	0
CNVR_1145	DEL	0	1	0
CNVR_1148	DEL	0	1	0
CNVR_1150	CNV	0	2	0
CNVR_1155	CNV	0	1	0
CNVR_1163	CNV	1	1	1
CNVR_1164	DEL	2	0	1
CNVR_1165	CNV	1	0	0
CNVR_1168	DEL	1	1	1
CNVR_1195	DEL	2	1	1
CNVR_1198	DEL	0	2	0
CNVR_1204	DEL	2	0	1
CNVR_1206	DEL	1	4	0
CNVR_1210	DEL	0	1	0
CNVR_1214	DEL	1	6	0
CNVR_1215	DEL	2	0	1
CNVR_1219	DEL	0	1	0
CNVR_1221	DEL	0	1	0
CNVR_1227	DEL	0	1	0
CNVR_1234	DUP	0	2	0
CNVR_1238	DEL	2	2	1
CNVR_1240	DEL	2	0	1
CNVR_1242	DEL	0	1	0
CNVR_1245	DEL	0	2	0
CNVR_1260	DEL	0	2	0
CNVR_1279	DEL	2	0	1
CNVR_1286	DEL	0	2	1
CNVR_1288	DEL	0	2	0
CNVR_1290	DEL	2	1	1
CNVR_1300	DEL	1	1	1
CNVR_1301	DEL	1	2	1
CNVR_1303	DEL	1	2	1
CNVR_1305	DEL	2	4	1
CNVR_1306	DEL	1	3	1
CNVR_1310	DEL	2	2	1
CNVR_1313	DEL	1	1	1
CNVR_1314	DEL	0	1	0
CNVR_1315	DEL	2	0	1
CNVR_1316	DEL	0	2	0
CNVR_1323	DEL	1	1	1
CNVR_1328	DEL	2	1	1
CNVR_1334	DEL	2	0	1
CNVR_1343	DEL	0	1	0
CNVR_1348	DEL	0	1	0
CNVR_1350	DEL	0	1	0
CNVR_1351	DEL	0	1	0
CNVR_1353	DEL	0	4	0
CNVR_1356	DEL	2	3	1
CNVR_1358	DUP	1	1	1
CNVR_1362	DEL	2	3	1
CNVR_1367	DEL	1	1	1
CNVR_1371	DEL	0	1	0
CNVR_1374	DEL	0	1	0
CNVR_1385	DEL	2	3	1
CNVR_1389	DEL	0	1	0
CNVR_1391	DEL	0	4	0
CNVR_1396	DEL	0	3	0
CNVR_1405	DEL	1	0	0
CNVR_1409	DEL	0	1	0
CNVR_1415	DEL	2	7	1
CNVR_1417	DEL	0	1	0
CNVR_1423	DEL	0	1	0
CNVR_1426	CNV	0	1	0
CNVR_1427	CNV	0	1	0
CNVR_1435	DEL	0	1	0
CNVR_1439	DEL	1	5	1
CNVR_1450	CNV	0	4	0
CNVR_1453	DEL	1	0	0
CNVR_1458	DEL	0	3	0
CNVR_1459	DEL	1	0	0
CNVR_1466	DEL	0	1	0
CNVR_1469	DEL	0	1	0
CNVR_1473	CNV	0	1	0
CNVR_1475	DEL	0	1	0
CNVR_1477	DEL	2	0	1
CNVR_1484	DEL	0	1	0
CNVR_1489	DEL	0	2	0
CNVR_1497	DEL	1	1	1
CNVR_1500	DEL	1	0	0
CNVR_1501	DEL	0	1	0
CNVR_1505	DEL	0	1	0
CNVR_1511	DEL	0	3	1
CNVR_1521	DEL	0	1	0
CNVR_1522	DEL	2	4	1
CNVR_1525	DEL	1	1	1
CNVR_1528	DEL	1	0	0
CNVR_1534	DEL	0	1	0
CNVR_1535	DEL	0	2	0
CNVR_1536	DEL	0	1	0
CNVR_1539	DEL	1	0	0
CNVR_1540	DEL	0	2	0
CNVR_1542	DEL	0	2	0
CNVR_1544	DEL	2	0	1
CNVR_1546	DEL	2	2	1
CNVR_1547	DEL	1	2	1
CNVR_1549	DEL	1	1	1
CNVR_1552	DEL	0	1	0
CNVR_1555	DUP	0	1	0
CNVR_1557	DEL	0	1	0
CNVR_1559	DEL	0	1	0
CNVR_1568	DEL	0	1	0
CNVR_1570	DEL	1	0	0
CNVR_1571	DEL	1	0	0
CNVR_1572	DEL	1	0	0
CNVR_1574	DEL	0	1	0
CNVR_1576	DEL	0	1	0
CNVR_1584	DEL	1	1	0
CNVR_1585	DEL	2	2	1
CNVR_1589	DEL	1	1	1
CNVR_1593	DEL	0	1	0
CNVR_1596	DEL	1	0	0
CNVR_1605	DEL	2	0	1
CNVR_1606	DEL	0	2	0
CNVR_1611	DEL	2	6	1
CNVR_1624	DEL	0	2	0
CNVR_1626	DEL	0	2	0
CNVR_1627	DEL	2	1	1
CNVR_1634	DEL	2	7	2
CNVR_1643	DEL	0	1	0
CNVR_1648	DEL	2	1	1
CNVR_1652	DEL	0	3	0
CNVR_1653	DEL	1	0	0
CNVR_1655	DEL	0	1	0
CNVR_1656	DEL	0	1	0
CNVR_1657	DEL	0	1	0
CNVR_1659	DEL	0	1	0
CNVR_1667	DEL	0	3	0
CNVR_1669	DEL	0	1	0
CNVR_1672	DEL	1	0	0
CNVR_1673	DEL	1	0	0
CNVR_1674	DEL	2	1	1
CNVR_1675	DEL	0	1	0
CNVR_1677	DEL	2	5	1
CNVR_1678	DEL	0	1	0
CNVR_1680	DEL	2	1	1
CNVR_1681	DEL	0	1	0
CNVR_1684	DEL	0	1	0
CNVR_1692	DEL	0	1	0
CNVR_1695	DEL	0	2	0
CNVR_1698	DEL	0	2	0
CNVR_1703	DEL	0	2	0
CNVR_1708	DEL	2	5	2
CNVR_1717	DEL	0	2	0
CNVR_1718	DEL	2	10	2
CNVR_1719	DEL	1	2	0
CNVR_1728	DEL	0	2	0
CNVR_1729	DEL	0	1	0
CNVR_1733	DEL	0	1	0
CNVR_1735	DEL	0	2	0
CNVR_1736	DEL	2	0	1
CNVR_1739	DEL	2	0	1
CNVR_1745	DEL	2	6	1
CNVR_1753	DEL	2	6	2
CNVR_1758	DEL	0	1	0
CNVR_1762	CNV	0	1	0
CNVR_1770	DEL	0	2	0
CNVR_1774	DEL	1	1	0
CNVR_1779	DEL	1	2	1
CNVR_1786	DEL	1	6	1
CNVR_1790	DEL	0	1	0
CNVR_1794	DEL	0	1	0
CNVR_1795	DEL	0	1	0
CNVR_1796	DEL	2	2	1
CNVR_1797	DEL	2	3	1
CNVR_1798	DEL	0	1	0
CNVR_1799	DEL	2	0	1
CNVR_1800	DEL	0	2	0
CNVR_1803	DEL	1	2	1
CNVR_1805	DEL	2	4	1
CNVR_1808	DEL	0	1	0
CNVR_1816	DEL	2	2	1
CNVR_1817	DEL	0	1	0
CNVR_1826	DEL	0	1	0
CNVR_1840	DEL	0	1	0
CNVR_1843	DEL	0	2	0
CNVR_1855	DUP	0	1	0
CNVR_1861	DEL	2	1	1
CNVR_1864	DEL	0	1	0
CNVR_1875	DEL	0	3	0
CNVR_1876	DEL	0	1	0
CNVR_1877	DEL	0	2	0
CNVR_1883	DEL	0	2	0
CNVR_1884	DEL	2	3	1
CNVR_1885	DEL	2	3	1
CNVR_1893	DEL	0	1	0
CNVR_1899	DEL	2	1	1
CNVR_1914	DEL	1	4	1
CNVR_1925	DEL	2	5	1
CNVR_1926	DEL	2	0	1
CNVR_1927	DEL	1	0	0
CNVR_1931	DEL	1	0	0
CNVR_1935	DEL	0	1	0
CNVR_1940	DEL	0	1	0
CNVR_1941	DEL	0	2	1
CNVR_1955	DEL	2	0	1
CNVR_1961	DEL	2	1	1
CNVR_1962	DEL	2	1	1
CNVR_1963	DEL	2	4	1
CNVR_1973	DEL	0	2	0
CNVR_1979	DEL	0	2	1
CNVR_1980	DEL	1	1	1
CNVR_1981	DEL	1	2	0
CNVR_1989	DEL	2	3	1
CNVR_1991	DEL	2	0	1
CNVR_2008	DEL	2	1	1
CNVR_2018	DEL	1	0	0
CNVR_2020	DEL	0	1	0
CNVR_2021	DEL	0	2	0
CNVR_2026	DEL	2	1	1
CNVR_2031	DEL	0	1	0
CNVR_2033	DEL	2	2	1
CNVR_2045	DEL	1	2	1
CNVR_2046	DEL	0	1	0
CNVR_2051	DEL	0	1	0
CNVR_2052	DEL	1	1	1
CNVR_2054	DEL	0	1	0
CNVR_2056	DEL	0	2	0
CNVR_2062	DEL	1	0	0
CNVR_2069	DEL	0	2	0
CNVR_2070	DEL	0	1	0
CNVR_2071	DEL	2	0	1
CNVR_2072	DEL	0	1	0
CNVR_2076	DEL	2	3	1
CNVR_2088	DEL	0	2	0
CNVR_2089	DEL	1	0	0
CNVR_2090	DEL	0	2	0
CNVR_2093	DEL	0	1	0
CNVR_2121	DEL	0	1	0
CNVR_2131	DEL	1	1	1
CNVR_2133	DEL	0	1	0
CNVR_2138	DEL	1	0	0
CNVR_2139	DEL	1	1	0
CNVR_2141	DEL	0	3	0
CNVR_2143	DEL	0	3	0
CNVR_2148	DEL	0	1	0
CNVR_2151	DEL	2	3	1
CNVR_2160	DEL	1	2	0
CNVR_2164	DEL	0	2	0
CNVR_2166	DEL	0	1	0
CNVR_2171	DEL	1	1	1
CNVR_2176	DEL	1	2	1
CNVR_2181	DEL	2	2	2
CNVR_2193	DEL	2	0	1
CNVR_2196	DEL	0	5	1
CNVR_2198	DEL	0	1	0
CNVR_2199	DEL	1	2	1
CNVR_2202	DEL	1	1	1
CNVR_2203	DEL	0	2	0
CNVR_2214	DEL	2	3	1
CNVR_2217	DEL	2	3	1
CNVR_2229	DEL	0	1	0
CNVR_2231	DEL	0	4	0
CNVR_2234	DEL	0	4	1
CNVR_2236	DEL	0	3	0
CNVR_2244	DEL	0	5	0
CNVR_2245	DEL	0	1	0
CNVR_2246	DEL	0	1	0
CNVR_2250	DEL	2	3	1
CNVR_2254	DEL	0	1	0
CNVR_2256	DEL	0	3	0
CNVR_2259	DEL	0	1	0
CNVR_2260	DEL	1	2	1
CNVR_2263	DEL	0	1	0
CNVR_2268	DEL	0	1	0
CNVR_2270	DEL	0	2	1
CNVR_2276	DEL	0	1	0
CNVR_2279	DEL	0	1	0
CNVR_2282	DEL	0	1	0
CNVR_2290	DEL	0	3	0
CNVR_2292	DEL	0	2	0
CNVR_2295	DEL	0	1	0
CNVR_2303	DEL	2	1	1
CNVR_2306	DEL	2	1	1
CNVR_2307	DEL	0	1	0
CNVR_2312	DEL	0	3	0
CNVR_2325	DEL	1	1	1
CNVR_2326	DEL	0	2	0
CNVR_2329	CNV	0	3	0
CNVR_2330	DEL	0	2	1
CNVR_2333	DEL	0	1	0
CNVR_2334	DEL	0	1	0
CNVR_2338	DEL	2	2	1
CNVR_2343	DEL	0	1	0
CNVR_2351	DEL	1	0	0
CNVR_2352	DEL	1	1	1
CNVR_2354	DEL	0	1	0
CNVR_2359	DEL	1	1	1
CNVR_2360	DEL	2	3	1
CNVR_2364	DEL	0	1	0
CNVR_2365	DEL	2	0	1
CNVR_2367	DEL	0	2	1
CNVR_2379	DEL	2	6	1
CNVR_2383	DEL	0	1	0
CNVR_2385	DEL	2	2	1
CNVR_2399	DEL	0	1	0
CNVR_2405	DEL	0	1	0
CNVR_2409	DEL	0	2	0
CNVR_2418	DEL	0	1	0
CNVR_2421	DEL	1	1	1
CNVR_2435	DEL	1	3	1
CNVR_2441	DEL	1	0	0
CNVR_2443	DEL	0	1	0
CNVR_2448	DEL	0	1	0
CNVR_2457	DEL	0	1	0
CNVR_2459	DEL	0	1	0
CNVR_2463	DEL	1	1	0
CNVR_2466	DEL	0	5	0
CNVR_2476	DEL	1	0	0
CNVR_2478	DEL	2	5	1
CNVR_2479	DEL	0	1	0
CNVR_2480	DEL	0	2	0
CNVR_2491	DEL	0	2	1
CNVR_2492	DEL	2	3	2
CNVR_2493	DEL	0	1	0
CNVR_2494	DEL	0	1	0
CNVR_2495	DEL	0	3	0
CNVR_2500	DEL	0	1	0
CNVR_2502	DEL	1	1	0
CNVR_2505	DEL	0	2	0
CNVR_2506	DEL	0	2	1
CNVR_2509	DEL	2	0	1
CNVR_2516	DEL	0	2	0
CNVR_2517	DEL	0	2	1
CNVR_2518	DEL	0	3	1
CNVR_2526	DEL	2	5	1
CNVR_2528	DEL	0	1	0
CNVR_2531	DEL	0	1	0
CNVR_2532	DEL	0	1	0
CNVR_2533	DEL	0	1	0
CNVR_2534	DEL	0	2	0
CNVR_2535	DEL	0	1	0
CNVR_2537	DEL	2	1	1
CNVR_2542	DEL	0	1	0
CNVR_2544	DEL	0	1	0
CNVR_2549	DEL	1	0	0
CNVR_2550	DEL	0	1	0
CNVR_2552	DEL	2	3	1
CNVR_2553	DEL	0	3	0
CNVR_2554	DEL	0	1	0
CNVR_2556	DEL	1	0	0
CNVR_2558	DEL	0	1	0
CNVR_2559	DEL	0	3	0
CNVR_2562	DEL	0	1	0
CNVR_2567	DEL	0	1	0
CNVR_2571	DEL	1	1	0
CNVR_2574	DEL	1	1	1
CNVR_2575	DEL	0	1	0
CNVR_2577	DEL	0	1	0
CNVR_2588	DEL	1	0	0
CNVR_2594	DEL	2	2	1
CNVR_2601	DEL	0	1	0
CNVR_2603	DEL	1	4	1
CNVR_2608	DEL	0	1	0
CNVR_2613	DEL	0	2	0
CNVR_2614	DEL	0	1	0
CNVR_2616	DEL	0	3	0
CNVR_2622	DEL	0	1	0
CNVR_2626	DEL	2	5	1
CNVR_2631	DEL	1	0	0
CNVR_2634	DEL	2	0	1
CNVR_2636	DEL	0	1	0
CNVR_2644	DEL	0	1	0
CNVR_2645	DEL	0	1	0
CNVR_2646	DEL	1	2	0
CNVR_2651	DEL	1	0	0
CNVR_2655	DEL	0	1	0
CNVR_2656	DEL	0	1	0
CNVR_2662	DEL	1	0	0
CNVR_2666	DEL	0	2	0
CNVR_2671	DEL	0	7	0
CNVR_2672	DUP	1	1	1
CNVR_2676	CNV	0	12	1
CNVR_2677	DEL	0	1	0
CNVR_2680	DEL	2	4	1
CNVR_2681	DEL	0	1	0
CNVR_2682	DEL	0	1	0
CNVR_2685	DEL	2	0	1
CNVR_2686	DEL	2	3	1
CNVR_2688	DEL	1	1	1
CNVR_2692	DEL	0	2	0
CNVR_2700	DEL	2	1	1
CNVR_2701	DEL	2	3	1
CNVR_2703	DEL	2	3	1
CNVR_2706	DEL	2	0	1
CNVR_2707	DEL	0	3	0
CNVR_2709	DEL	1	0	0
CNVR_2711	DEL	2	1	1
CNVR_2718	DEL	0	1	0
CNVR_2725	DEL	0	1	0
CNVR_2731	DEL	2	1	1
CNVR_2733	DEL	0	1	0
CNVR_2737	DEL	2	0	1
CNVR_2740	DEL	2	0	1
CNVR_2742	DEL	1	0	0
CNVR_2744	DEL	2	0	1
CNVR_2749	DEL	2	1	1
CNVR_2754	DEL	2	1	1
CNVR_2758	DEL	1	1	0
CNVR_2763	DEL	2	10	2
CNVR_2768	DEL	0	1	0
CNVR_2777	DEL	0	1	0
CNVR_2779	DEL	2	2	1
CNVR_2780	DEL	1	3	1
CNVR_2781	DEL	1	1	1
CNVR_2784	DEL	1	1	1
CNVR_2786	DEL	2	0	1
CNVR_2788	DEL	1	0	0
CNVR_2789	DEL	2	2	1
CNVR_2795	DEL	2	3	1
CNVR_2797	DEL	0	1	0
CNVR_2800	DEL	1	1	1
CNVR_2801	DEL	1	1	1
CNVR_2811	DEL	1	1	1
CNVR_2813	DEL	0	5	0
CNVR_2815	DEL	0	2	0
CNVR_2824	DEL	2	2	1
CNVR_2825	DEL	0	5	0
CNVR_2826	DEL	0	1	0
CNVR_2829	DEL	2	0	1
CNVR_2836	DEL	0	2	0
CNVR_2843	DEL	0	1	0
CNVR_2844	DEL	0	1	0
CNVR_2846	DEL	0	1	0
CNVR_2849	DEL	0	3	0
CNVR_2858	DEL	0	1	0
CNVR_2867	DEL	0	2	0
CNVR_2876	DEL	0	2	0
CNVR_2879	DEL	0	2	0
CNVR_2883	DEL	1	1	1
CNVR_2891	DEL	1	0	0
CNVR_2893	DEL	0	1	0
CNVR_2894	DEL	0	1	0
CNVR_2898	DEL	2	3	1
CNVR_2899	DEL	0	4	0
CNVR_2905	DEL	0	1	0
CNVR_2914	DEL	0	1	0
CNVR_2918	DEL	0	1	0
CNVR_2919	DEL	1	3	0
CNVR_2921	DEL	0	1	0
CNVR_2930	DEL	0	1	0
CNVR_2932	DEL	1	0	0
CNVR_2934	DEL	1	1	1
CNVR_2935	DEL	0	1	0
CNVR_2944	DEL	2	0	1
CNVR_2945	DEL	1	1	0
CNVR_2951	DEL	1	1	1
CNVR_2958	DEL	0	1	0
CNVR_2961	DEL	2	4	1
CNVR_2963	DEL	0	1	0
CNVR_2964	DEL	0	1	0
CNVR_2965	DEL	1	0	0
CNVR_2972	DEL	0	1	0
CNVR_2973	DEL	0	1	0
CNVR_2976	DEL	0	1	0
CNVR_2981	DEL	2	1	1
CNVR_2982	DEL	2	8	2
CNVR_2990	DEL	2	0	1
CNVR_2994	DEL	2	4	1
CNVR_2997	DEL	0	1	0
CNVR_3001	CNV	1	1	0
CNVR_3003	DEL	1	8	0
CNVR_3006	DEL	2	4	1
CNVR_3012	DEL	2	3	1
CNVR_3017	DEL	2	3	1
CNVR_3028	DEL	0	1	0
CNVR_3031	DEL	1	0	0
CNVR_3041	DEL	0	1	0
CNVR_3043	DEL	2	2	1
CNVR_3044	DEL	2	3	1
CNVR_3046	DEL	1	0	0
CNVR_3053	DEL	0	1	0
CNVR_3054	DEL	0	1	0
CNVR_3055	DEL	2	1	1
CNVR_3060	DEL	0	1	0
CNVR_3064	DEL	0	3	0
CNVR_3065	DUP	2	0	1
CNVR_3066	DEL	0	1	0
CNVR_3068	DEL	1	1	1
CNVR_3074	CNV	0	4	0
CNVR_3075	DEL	0	1	0
CNVR_3077	DEL	0	1	0
CNVR_3081	DEL	2	0	1
CNVR_3086	DEL	2	2	1
CNVR_3099	DEL	2	2	1
CNVR_3107	DEL	0	2	0
CNVR_3116	DEL	0	4	0
CNVR_3120	DEL	2	0	1
CNVR_3121	DEL	2	0	1
CNVR_3124	DEL	2	0	1
CNVR_3132	DEL	2	0	1
CNVR_3133	DEL	0	2	0
CNVR_3135	DEL	0	2	0
CNVR_3136	DEL	0	1	0
CNVR_3138	DEL	0	2	0
CNVR_3144	DEL	2	3	1
CNVR_3146	DEL	0	1	0
CNVR_3150	DEL	0	1	0
CNVR_3151	DEL	1	1	1
CNVR_3152	DEL	1	0	0
CNVR_3155	DEL	2	1	1
CNVR_3158	DEL	1	2	1
CNVR_3169	DEL	1	2	0
CNVR_3173	DEL	0	1	0
CNVR_3175	DEL	0	1	0
CNVR_3181	DEL	2	0	1
CNVR_3183	DEL	2	7	1
CNVR_3187	DEL	2	3	1
CNVR_3191	DEL	1	1	0
CNVR_3196	DEL	0	1	0
CNVR_3199	DEL	0	1	0
CNVR_3201	DEL	0	2	0
CNVR_3212	DEL	1	1	1
CNVR_3213	DEL	2	2	1
CNVR_3216	DEL	0	6	1
CNVR_3218	DEL	1	1	1
CNVR_3219	DEL	2	0	1
CNVR_3220	DEL	0	1	0
CNVR_3223	DEL	1	0	0
CNVR_3228	DEL	1	4	1
CNVR_3235	DEL	0	1	0
CNVR_3236	DEL	0	2	0
CNVR_3239	DEL	2	0	1
CNVR_3240	DEL	2	5	1
CNVR_3249	DEL	2	1	1
CNVR_3250	CNV	0	3	0
CNVR_3252	CNV	1	3	1
CNVR_3255	DEL	0	1	0
CNVR_3257	DEL	0	1	0
CNVR_3258	DEL	0	2	0
CNVR_3261	DEL	0	1	0
CNVR_3271	DEL	1	1	1
CNVR_3276	DEL	1	1	1
CNVR_3280	DEL	1	2	1
CNVR_3281	DEL	2	0	1
CNVR_3283	DEL	0	1	0
CNVR_3289	CNV	0	1	0
CNVR_3290	CNV	0	1	0
CNVR_3292	CNV	0	1	0
CNVR_3296	CNV	2	3	1
CNVR_3298	CNV	2	4	1
CNVR_3299	CNV	0	5	0
CNVR_3301	CNV	0	3	0
CNVR_3302	DEL	2	1	1
CNVR_3303	DEL	0	1	0
CNVR_3305	DEL	2	1	1
CNVR_3309	DEL	0	2	0
CNVR_3312	DEL	0	2	0
CNVR_3313	DEL	0	2	1
CNVR_3315	DEL	1	1	1
CNVR_3319	CNV	0	2	0
CNVR_3322	CNV	0	4	0
CNVR_3323	DEL	0	1	0
CNVR_3328	DEL	0	1	0
CNVR_3331	CNV	0	1	0
CNVR_3332	CNV	0	1	0
CNVR_3333	DEL	0	1	0
CNVR_3335	CNV	0	1	0
CNVR_3352	DEL	0	1	0
CNVR_3354	DEL	0	1	0
CNVR_3356	DEL	1	2	1
CNVR_3357	DEL	2	1	1
CNVR_3371	DEL	2	2	1
CNVR_3374	DEL	2	9	2
CNVR_3376	DEL	1	2	1
CNVR_3377	DEL	2	4	1
CNVR_3385	DEL	2	0	1
CNVR_3388	DEL	1	1	1
CNVR_3390	DEL	1	0	0
CNVR_3392	CNV	0	5	1
CNVR_3396	DEL	1	5	1
CNVR_3407	CNV	0	1	0
CNVR_3411	DEL	0	1	0
CNVR_3413	DEL	2	2	1
CNVR_3419	DEL	0	1	0
CNVR_3420	DEL	0	1	0
CNVR_3425	DEL	0	1	0
CNVR_3426	DEL	2	0	1
CNVR_3430	DEL	0	3	1
CNVR_3434	DEL	2	0	1
CNVR_3436	DEL	0	1	0
CNVR_3437	DEL	0	1	0
CNVR_3438	DEL	0	2	0
CNVR_3440	DEL	0	1	0
CNVR_3442	DEL	2	5	2
CNVR_3443	DEL	1	0	0
CNVR_3445	DEL	1	0	0
CNVR_3446	DEL	0	2	0
CNVR_3447	DEL	1	0	0
CNVR_3450	DEL	2	1	1
CNVR_3451	DEL	0	1	0
CNVR_3459	DEL	0	2	0
CNVR_3463	DEL	0	1	0
CNVR_3474	DEL	0	1	0
CNVR_3476	DEL	0	2	0
CNVR_3478	DEL	1	0	0
CNVR_3480	DEL	0	1	0
CNVR_3490	DEL	0	2	0
CNVR_3492	DEL	0	1	0
CNVR_3494	DEL	0	1	0
CNVR_3495	DEL	0	1	0
CNVR_3498	DEL	0	4	0
CNVR_3499	DEL	0	1	0
CNVR_3501	DEL	0	1	0
CNVR_3518	DEL	2	0	1
CNVR_3520	DEL	0	1	0
CNVR_3528	DEL	2	0	1
CNVR_3532	CNV	1	4	0
CNVR_3534	DEL	0	1	0
CNVR_3537	DEL	1	0	0
CNVR_3538	DEL	0	1	0
CNVR_3543	DEL	0	1	0
CNVR_3556	DEL	2	2	1
CNVR_3558	DEL	0	2	0
CNVR_3560	DEL	0	1	0
CNVR_3563	DEL	2	8	1
CNVR_3567	DEL	2	3	1
CNVR_3568	DEL	0	1	0
CNVR_3572	DEL	0	1	0
CNVR_3582	DEL	1	2	1
CNVR_3583	DEL	1	1	1
CNVR_3587	DEL	0	2	0
CNVR_3591	DEL	2	1	1
CNVR_3595	DEL	2	4	1
CNVR_3597	DEL	2	0	1
CNVR_3601	DEL	0	1	0
CNVR_3605	DEL	2	1	1
CNVR_3606	DEL	2	2	1
CNVR_3614	DEL	2	0	1
CNVR_3616	DEL	0	1	0
CNVR_3619	DEL	2	1	1
CNVR_3620	DEL	0	1	0
CNVR_3624	DEL	0	1	0
CNVR_3625	DEL	0	1	0
CNVR_3626	DEL	2	0	1
CNVR_3630	DEL	0	1	0
CNVR_3633	CNV	0	4	0
CNVR_3634	DEL	0	2	0
CNVR_3635	DEL	0	3	1
CNVR_3637	DEL	0	1	0
CNVR_3645	CNV	0	2	0
CNVR_3648	DEL	0	1	0
CNVR_3651	DEL	0	7	1
CNVR_3652	DEL	0	1	0
CNVR_3656	CNV	0	2	0
CNVR_3663	DEL	0	1	0
CNVR_3667	DEL	0	6	0
CNVR_3676	DEL	0	1	0
CNVR_3684	DEL	2	2	1
CNVR_3690	DEL	0	2	0
CNVR_3694	DEL	0	1	0
CNVR_3699	DEL	1	0	0
CNVR_3700	DEL	2	0	1
CNVR_3704	DEL	0	1	0
CNVR_3712	DEL	0	2	0
CNVR_3716	DEL	1	1	1
CNVR_3719	DEL	1	1	1
CNVR_3721	DEL	0	1	0
CNVR_3723	DEL	0	1	0
CNVR_3727	DEL	2	3	1
CNVR_3737	DEL	2	0	1
CNVR_3742	DEL	1	2	1
CNVR_3743	DEL	0	1	0
CNVR_3745	DEL	2	1	1
CNVR_3747	DEL	0	1	0
CNVR_3751	DEL	0	3	0
CNVR_3756	DEL	1	1	1
CNVR_3765	DEL	2	1	1
CNVR_3767	DEL	2	0	1
CNVR_3779	DEL	1	1	1
CNVR_3781	DEL	0	1	0
CNVR_3783	DEL	2	0	1
CNVR_3785	DEL	2	0	1
CNVR_3787	DEL	0	1	0
CNVR_3793	DEL	2	1	1
CNVR_3795	DEL	2	0	1
CNVR_3798	DEL	1	2	0
CNVR_3800	DEL	0	2	0
CNVR_3805	DEL	0	1	0
CNVR_3809	DEL	1	1	1
CNVR_3810	DEL	0	2	0
CNVR_3824	DEL	2	0	1
CNVR_3830	DEL	0	1	0
CNVR_3836	DEL	1	2	1
CNVR_3848	DEL	2	0	1
CNVR_3852	DEL	2	2	1
CNVR_3853	DEL	0	1	0
CNVR_3856	DEL	1	1	1
CNVR_3859	DEL	0	1	0
CNVR_3864	DEL	2	0	1
CNVR_3865	DEL	0	3	0
CNVR_3866	DEL	0	1	0
CNVR_3870	DEL	1	3	1
CNVR_3872	DEL	0	1	0
CNVR_3875	DEL	2	1	1
CNVR_3886	DEL	2	0	1
CNVR_3896	DEL	0	1	0
CNVR_3901	DEL	0	1	0
CNVR_3902	DEL	0	1	0
CNVR_3904	DEL	2	1	1
CNVR_3905	DEL	2	0	1
CNVR_3910	DEL	2	0	1
CNVR_3914	DEL	1	2	0
CNVR_3915	DEL	0	2	0
CNVR_3918	DEL	2	5	1
CNVR_3922	DEL	1	1	1
CNVR_3925	DEL	0	1	0
CNVR_3930	DEL	0	1	0
CNVR_3935	DEL	2	5	2
CNVR_3939	DEL	0	15	1
CNVR_3944	DEL	0	1	0
CNVR_3948	DEL	0	2	0
CNVR_3950	DEL	0	1	0
CNVR_3952	DEL	0	1	0
CNVR_3954	DEL	1	2	1
CNVR_3955	DEL	0	1	0
CNVR_3964	DEL	0	2	0
CNVR_3969	DEL	0	2	0
CNVR_3970	DEL	2	0	1
CNVR_3971	DEL	0	1	0
CNVR_3973	DEL	1	0	0
CNVR_3975	DEL	0	1	0
CNVR_3979	DEL	2	3	1
CNVR_3989	DEL	0	1	0
CNVR_4002	DEL	0	3	0
CNVR_4004	DEL	0	1	0
CNVR_4014	DEL	0	1	0
CNVR_4015	DEL	0	1	0
CNVR_4016	DEL	0	1	0
CNVR_4017	DEL	0	1	0
CNVR_4023	DEL	0	2	0
CNVR_4026	DEL	2	2	1
CNVR_4034	DEL	0	2	1
CNVR_4042	DEL	2	3	1
CNVR_4045	DEL	0	1	0
CNVR_4046	DEL	2	2	1
CNVR_4047	DEL	0	2	1
CNVR_4048	DEL	0	2	0
CNVR_4049	DEL	0	2	0
CNVR_4054	CNV	0	2	0
CNVR_4055	DEL	1	0	0
CNVR_4057	DEL	1	0	0
CNVR_4058	CNV	0	4	1
CNVR_4059	CNV	1	2	0
CNVR_4061	CNV	1	7	1
CNVR_4062	CNV	1	10	1
CNVR_4064	DEL	0	1	0
CNVR_4067	DEL	0	7	1
CNVR_4070	CNV	1	7	1
CNVR_4076	DEL	2	0	1
CNVR_4077	CNV	0	2	0
CNVR_4082	DUP	0	1	0
CNVR_4083	CNV	0	1	0
CNVR_4088	CNV	2	16	2
CNVR_4090	DEL	0	1	0
CNVR_4093	CNV	0	1	0
CNVR_4094	CNV	0	1	0
CNVR_4105	CNV	2	0	1
CNVR_4107	CNV	0	2	0
CNVR_4113	CNV	0	1	0
CNVR_4115	DEL	0	4	1
CNVR_4118	DEL	1	2	1
CNVR_4120	DEL	0	9	1
CNVR_4121	DEL	0	3	1
CNVR_4123	DEL	1	1	1
CNVR_4128	DEL	0	1	0
CNVR_4136	CNV	0	3	0
CNVR_4146	DEL	0	1	0
CNVR_4154	DEL	0	1	0
CNVR_4155	DEL	0	1	0
CNVR_4159	DEL	0	1	0
CNVR_4166	DEL	1	1	0
CNVR_4178	DEL	1	1	1
CNVR_4182	DEL	0	1	0
CNVR_4184	DEL	2	0	1
CNVR_4185	DEL	0	1	0
CNVR_4187	DEL	0	1	0
CNVR_4188	DEL	0	3	0
CNVR_4189	DEL	1	2	0
CNVR_4190	DEL	0	1	0
CNVR_4191	DEL	0	1	0
CNVR_4193	DEL	0	2	0
CNVR_4195	DEL	0	1	0
CNVR_4198	DEL	0	1	0
CNVR_4199	CNV	0	1	0
CNVR_4217	DEL	2	1	1
CNVR_4219	DEL	0	1	0
CNVR_4220	DEL	0	1	0
CNVR_4222	DEL	2	0	1
CNVR_4226	DEL	1	1	0
CNVR_4227	DEL	0	1	0
CNVR_4230	DEL	0	4	0
CNVR_4239	DEL	0	1	0
CNVR_4244	CNV	0	2	0
CNVR_4246	DEL	0	3	0
CNVR_4248	DEL	0	2	0
CNVR_4255	DEL	0	1	0
CNVR_4262	DEL	2	0	1
CNVR_4264	DEL	0	2	0
CNVR_4265	DEL	2	3	1
CNVR_4276	DEL	0	1	0
CNVR_4279	DEL	0	1	0
CNVR_4280	DEL	1	1	1
CNVR_4281	DEL	0	1	0
CNVR_4284	DEL	0	1	0
CNVR_4290	DEL	0	2	0
CNVR_4291	DEL	0	1	0
CNVR_4292	DEL	1	1	1
CNVR_4300	DEL	2	1	1
CNVR_4303	DEL	0	1	0
CNVR_4306	DEL	2	2	1
CNVR_4313	DEL	0	1	0
CNVR_4314	DEL	0	1	0
CNVR_4315	DEL	0	1	0
CNVR_4317	DEL	0	1	0
CNVR_4330	DEL	0	1	0
CNVR_4334	DEL	2	3	1
CNVR_4339	DEL	2	5	1
CNVR_4341	DEL	0	1	0
CNVR_4344	DEL	2	0	1
CNVR_4345	DEL	2	4	1
CNVR_4348	DEL	0	1	0
CNVR_4350	DEL	2	2	1
CNVR_4357	DEL	0	1	0
CNVR_4360	DEL	1	0	0
CNVR_4364	DEL	0	1	0
CNVR_4365	DEL	0	1	0
CNVR_4369	DEL	1	1	1
CNVR_4370	DEL	0	1	0
CNVR_4371	DEL	1	1	1
CNVR_4373	DEL	0	3	0
CNVR_4380	DEL	1	0	0
CNVR_4383	DEL	2	1	1
CNVR_4396	DEL	1	5	1
CNVR_4397	DEL	1	3	1
CNVR_4400	DEL	2	4	1
CNVR_4404	DEL	0	1	0
CNVR_4405	DEL	1	1	0
CNVR_4410	DEL	0	3	0
CNVR_4414	DEL	0	1	0
CNVR_4420	DEL	1	8	2
CNVR_4429	DEL	2	0	1
CNVR_4433	DEL	0	3	0
CNVR_4440	DEL	0	1	0
CNVR_4445	DEL	2	0	1
CNVR_4446	DEL	0	1	0
CNVR_4447	DEL	0	1	0
CNVR_4448	DEL	0	1	0
CNVR_4449	DEL	2	8	1
CNVR_4450	DEL	1	1	1
CNVR_4454	DEL	0	1	0
CNVR_4459	DEL	0	1	0
CNVR_4466	DEL	0	4	0
CNVR_4471	DEL	0	1	0
CNVR_4472	DEL	0	2	0
CNVR_4473	DEL	0	2	0
CNVR_4475	DEL	1	0	0
CNVR_4476	DEL	2	0	1
CNVR_4477	DEL	0	1	0
CNVR_4482	DEL	0	2	0
CNVR_4486	DUP	0	1	0
CNVR_4488	DEL	1	1	1
CNVR_4494	DEL	0	1	0
CNVR_4495	DEL	0	1	0
CNVR_4499	DEL	0	1	0
CNVR_4506	DEL	0	1	0
CNVR_4507	DEL	0	1	0
CNVR_4509	DEL	0	2	0
CNVR_4510	DEL	2	5	1
CNVR_4511	DEL	0	1	0
CNVR_4513	DEL	1	0	0
CNVR_4515	DEL	1	0	0
CNVR_4519	DEL	0	1	0
CNVR_4521	DEL	0	2	0
CNVR_4531	DEL	1	1	1
CNVR_4534	DEL	0	1	0
CNVR_4538	DEL	0	3	0
CNVR_4542	DEL	0	1	0
CNVR_4544	DEL	2	2	1
CNVR_4546	DEL	0	1	0
CNVR_4550	DEL	0	2	0
CNVR_4552	DEL	1	1	1
CNVR_4558	DEL	0	1	0
CNVR_4561	DEL	1	3	0
CNVR_4564	DEL	0	1	0
CNVR_4568	DEL	1	0	0
CNVR_4575	DEL	0	2	0
CNVR_4576	DEL	2	2	1
CNVR_4578	DEL	0	2	0
CNVR_4582	DEL	0	1	0
CNVR_4584	DEL	0	4	0
CNVR_4585	DEL	0	2	0
CNVR_4589	DEL	0	3	0
CNVR_4591	DEL	2	0	1
CNVR_4593	DEL	0	3	0
CNVR_4602	DEL	2	2	1
CNVR_4603	DEL	1	0	0
CNVR_4606	DEL	0	1	0
CNVR_4612	DEL	1	1	1
CNVR_4613	DEL	1	2	0
CNVR_4614	DEL	2	5	2
CNVR_4615	DEL	1	0	0
CNVR_4616	DEL	2	1	1
CNVR_4618	DEL	2	3	1
CNVR_4624	DEL	0	1	0
CNVR_4628	DEL	0	3	0
CNVR_4629	DEL	2	2	2
CNVR_4640	DEL	2	3	1
CNVR_4654	DEL	1	0	0
CNVR_4655	DEL	0	2	0
CNVR_4660	DEL	2	7	2
CNVR_4664	DEL	2	0	1
CNVR_4667	DEL	0	2	0
CNVR_4672	DEL	0	3	0
CNVR_4673	DEL	0	1	0
CNVR_4682	DEL	1	3	1
CNVR_4684	DEL	0	2	0
CNVR_4687	DEL	0	2	0
CNVR_4693	DEL	0	2	1
CNVR_4696	DEL	2	8	1
CNVR_4698	DEL	0	1	0
CNVR_4705	DEL	1	0	0
CNVR_4707	DEL	2	11	2
CNVR_4708	DEL	0	5	0
CNVR_4709	DEL	0	1	0
CNVR_4715	DEL	1	0	0
CNVR_4717	DEL	2	1	1
CNVR_4720	DEL	2	2	1
CNVR_4724	DEL	1	1	1
CNVR_4729	DEL	0	1	0
CNVR_4733	DEL	0	2	0
CNVR_4737	DEL	0	1	0
CNVR_4750	DEL	2	3	1
CNVR_4755	DEL	0	1	0
CNVR_4756	DEL	0	2	0
CNVR_4758	DEL	0	1	0
CNVR_4763	DEL	0	1	0
CNVR_4767	DEL	1	0	0
CNVR_4768	DEL	1	1	1
CNVR_4769	DEL	2	7	2
CNVR_4772	DEL	2	5	2
CNVR_4779	DEL	0	2	0
CNVR_4785	DEL	0	1	0
CNVR_4797	DEL	0	2	1
CNVR_4805	CNV	0	2	0
CNVR_4816	DEL	2	3	1
CNVR_4821	DEL	1	1	1
CNVR_4823	DEL	0	3	1
CNVR_4824	DEL	2	2	1
CNVR_4826	DEL	0	2	0
CNVR_4828	DEL	1	0	0
CNVR_4833	DEL	2	1	1
CNVR_4842	DEL	0	2	0
CNVR_4843	DEL	1	0	0
CNVR_4846	DEL	0	1	0
CNVR_4853	DEL	1	1	1
CNVR_4854	DEL	1	0	0
CNVR_4855	DEL	0	1	0
CNVR_4859	DEL	2	1	1
CNVR_4860	DEL	0	3	1
CNVR_4862	DEL	0	1	0
CNVR_4864	DEL	0	1	0
CNVR_4867	DEL	0	1	0
CNVR_4878	DEL	0	1	0
CNVR_4883	DEL	1	0	0
CNVR_4888	DEL	0	1	0
CNVR_4889	DEL	1	1	1
CNVR_4891	DEL	0	4	0
CNVR_4904	DEL	0	1	0
CNVR_4909	DEL	2	0	1
CNVR_4927	DEL	2	0	1
CNVR_4928	DEL	2	0	1
CNVR_4932	DEL	2	3	1
CNVR_4936	DEL	0	1	0
CNVR_4944	DEL	2	6	2
CNVR_4948	DEL	1	2	1
CNVR_4951	DEL	2	1	1
CNVR_4961	DEL	0	1	0
CNVR_4976	DEL	2	0	1
CNVR_4983	DEL	2	4	1
CNVR_4987	DEL	1	2	1
CNVR_4988	DEL	2	1	1
CNVR_4989	DEL	1	1	1
CNVR_4996	DEL	2	0	1
CNVR_4998	DEL	2	2	1
CNVR_5012	DEL	0	1	0
CNVR_5014	DEL	1	2	0
CNVR_5020	DEL	2	0	1
CNVR_5023	DEL	0	1	0
CNVR_5028	DEL	2	5	2
CNVR_5031	DEL	2	5	1
CNVR_5052	DEL	1	2	1
CNVR_5056	DEL	0	1	0
CNVR_5070	DEL	0	1	0
CNVR_5072	DEL	0	1	0
CNVR_5073	DEL	0	4	0
CNVR_5077	DEL	0	2	0
CNVR_5079	DEL	0	1	0
CNVR_5081	DEL	0	2	0
CNVR_5083	DEL	0	2	0
CNVR_5086	DEL	0	1	0
CNVR_5087	DEL	2	7	1
CNVR_5092	DEL	1	0	0
CNVR_5093	DEL	0	1	0
CNVR_5098	DEL	2	1	1
CNVR_5103	DEL	2	0	1
CNVR_5105	DEL	0	1	0
CNVR_5113	DEL	1	1	0
CNVR_5122	DEL	1	0	0
CNVR_5129	DUP	1	1	1
CNVR_5131	CNV	1	1	0
CNVR_5134	DEL	0	2	0
CNVR_5135	DEL	0	1	0
CNVR_5138	CNV	0	2	1
CNVR_5140	DEL	1	0	0
CNVR_5142	DEL	1	2	1
CNVR_5150	CNV	0	1	0
CNVR_5158	DEL	1	0	0
CNVR_5159	DEL	0	1	0
CNVR_5163	DEL	2	0	1
CNVR_5169	DEL	1	1	1
CNVR_5172	DEL	0	1	0
CNVR_5174	DEL	0	2	0
CNVR_5181	DEL	2	0	1
CNVR_5186	DEL	2	0	1
CNVR_5188	DEL	1	0	0
CNVR_5193	DEL	0	1	0
CNVR_5196	DEL	2	2	1
CNVR_5202	DEL	2	2	1
CNVR_5204	DEL	0	1	0
CNVR_5206	DEL	0	1	0
CNVR_5207	DEL	0	1	0
CNVR_5210	DEL	0	1	0
CNVR_5215	DEL	0	3	0
CNVR_5216	DEL	0	3	0
CNVR_5225	DEL	0	1	0
CNVR_5226	DEL	0	2	1
CNVR_5227	DEL	0	1	0
CNVR_5228	DEL	0	4	1
CNVR_5230	DEL	0	2	0
CNVR_5232	DEL	0	1	0
CNVR_5233	DEL	2	3	1
CNVR_5239	DEL	2	0	1
CNVR_5241	DEL	0	2	0
CNVR_5247	DEL	0	2	1
CNVR_5248	DEL	0	2	0
CNVR_5250	DEL	2	0	1
CNVR_5252	DEL	1	1	1
CNVR_5255	DEL	0	2	0
CNVR_5266	DEL	2	0	1
CNVR_5270	DEL	0	1	0
CNVR_5272	DEL	0	1	0
CNVR_5274	DEL	2	3	1
CNVR_5278	DEL	0	1	0
CNVR_5279	DEL	0	2	0
CNVR_5280	DEL	2	3	1
CNVR_5281	DEL	1	2	1
CNVR_5282	DEL	1	2	0
CNVR_5284	DEL	1	0	0
CNVR_5285	DEL	0	1	0
CNVR_5289	DEL	2	0	1
CNVR_5298	DEL	2	0	1
CNVR_5299	DEL	0	1	0
CNVR_5305	DEL	0	1	0
CNVR_5308	DEL	0	1	0
CNVR_5309	DEL	2	2	1
CNVR_5310	DEL	0	1	0
CNVR_5314	DEL	2	2	1
CNVR_5316	DEL	0	3	0
CNVR_5330	DEL	2	0	1
CNVR_5339	DEL	0	1	0
CNVR_5341	DEL	0	1	0
CNVR_5349	DEL	0	2	0
CNVR_5352	DEL	0	1	0
CNVR_5361	DEL	0	1	0
CNVR_5370	DEL	0	1	0
CNVR_5371	DEL	2	4	1
CNVR_5381	DEL	1	0	0
CNVR_5383	CNV	0	2	0
CNVR_5392	DEL	2	0	1
CNVR_5409	DEL	0	3	0
CNVR_5411	DEL	0	3	0
CNVR_5416	DEL	2	0	1
CNVR_5420	DEL	2	4	1
CNVR_5426	DEL	2	2	1
CNVR_5427	DEL	0	1	0
CNVR_5428	DEL	2	0	1
CNVR_5430	DEL	0	3	0
CNVR_5433	DEL	0	1	0
CNVR_5435	DEL	2	0	1
CNVR_5440	DEL	0	1	0
CNVR_5442	DEL	0	1	0
CNVR_5443	CNV	0	2	0
CNVR_5469	DEL	1	0	0
CNVR_5470	DEL	0	1	0
CNVR_5477	DEL	2	0	1
CNVR_5479	DEL	2	0	1
CNVR_5482	DEL	0	1	0
CNVR_5483	DEL	0	1	0
CNVR_5488	DEL	0	1	0
CNVR_5496	DEL	1	3	1
CNVR_5498	DEL	0	1	0
CNVR_5500	DEL	0	1	0
CNVR_5507	DEL	2	1	1
CNVR_5514	DEL	0	2	1
CNVR_5518	DEL	0	1	0
CNVR_5523	DEL	0	1	0
CNVR_5527	DEL	0	1	0
CNVR_5535	DEL	2	3	1
CNVR_5536	DEL	0	2	1
CNVR_5537	DEL	0	3	0
CNVR_5538	DEL	0	2	0
CNVR_5540	DEL	0	1	0
CNVR_5543	DEL	0	1	0
CNVR_5544	DEL	0	1	0
CNVR_5546	DEL	0	4	1
CNVR_5551	DEL	0	1	0
CNVR_5555	DEL	1	1	1
CNVR_5558	DEL	1	0	0
CNVR_5561	DEL	0	1	0
CNVR_5566	DEL	0	2	0
CNVR_5567	DEL	1	1	1
CNVR_5571	CNV	0	1	0
CNVR_5572	DEL	0	1	0
CNVR_5573	DEL	0	1	0
CNVR_5578	DEL	0	1	0
CNVR_5581	DEL	1	1	1
CNVR_5582	DEL	2	0	1
CNVR_5583	DEL	2	7	2
CNVR_5585	DEL	0	1	0
CNVR_5586	DEL	2	2	1
CNVR_5587	DEL	2	6	1
CNVR_5589	DEL	0	1	0
CNVR_5590	DEL	2	10	1
CNVR_5591	CNV	0	2	0
CNVR_5608	DEL	0	1	0
CNVR_5614	DEL	1	1	1
CNVR_5617	DEL	0	3	0
CNVR_5618	DEL	2	2	1
CNVR_5631	DEL	0	4	0
CNVR_5633	DEL	0	2	1
CNVR_5634	DEL	0	1	0
CNVR_5642	DEL	0	1	0
CNVR_5645	DEL	2	6	1
CNVR_5647	DEL	0	1	0
CNVR_5650	DEL	1	1	1
CNVR_5654	DEL	0	2	0
CNVR_5655	DEL	2	2	1
CNVR_5664	DEL	0	3	0
CNVR_5666	DEL	0	1	0
CNVR_5667	DEL	1	1	1
CNVR_5674	DEL	1	3	0
CNVR_5685	DEL	0	3	0
CNVR_5692	DEL	2	6	2
CNVR_5696	DEL	0	1	0
CNVR_5702	DEL	2	0	1
CNVR_5705	DEL	0	2	0
CNVR_5706	DEL	0	1	0
CNVR_5711	DEL	0	1	0
CNVR_5712	DEL	0	2	1
CNVR_5719	DEL	0	2	0
CNVR_5722	DEL	0	1	0
CNVR_5726	DEL	0	2	1
CNVR_5729	DEL	0	2	1
CNVR_5730	DEL	0	1	0
CNVR_5732	DEL	2	0	1
CNVR_5734	DEL	0	1	0
CNVR_5735	DEL	0	2	1
CNVR_5740	DEL	0	2	0
CNVR_5747	DEL	0	1	0
CNVR_5751	DEL	0	1	0
CNVR_5757	DEL	0	1	0
CNVR_5762	DEL	0	1	0
CNVR_5765	DEL	2	0	1
CNVR_5769	DEL	0	1	0
CNVR_5777	DEL	0	1	0
CNVR_5780	DEL	0	1	0
CNVR_5783	DEL	0	1	0
CNVR_5788	DEL	2	4	1
CNVR_5789	DEL	2	2	1
CNVR_5791	DEL	2	0	1
CNVR_5795	DEL	0	1	0
CNVR_5798	DEL	0	1	0
CNVR_5801	DEL	0	1	0
CNVR_5804	CNV	0	4	0
CNVR_5809	DEL	0	2	0
CNVR_5814	DEL	0	1	0
CNVR_5817	DEL	1	0	0
CNVR_5832	DEL	2	2	1
CNVR_5837	DEL	2	1	1
CNVR_5838	DEL	0	1	0
CNVR_5842	DEL	2	5	2
CNVR_5844	DEL	2	0	1
CNVR_5863	DEL	0	2	0
CNVR_5874	DEL	1	0	0
CNVR_5879	DEL	1	1	0
CNVR_5885	DEL	0	1	0
CNVR_5886	DEL	0	1	0
CNVR_5895	DEL	2	7	2
CNVR_5899	DEL	0	1	0
CNVR_5902	DEL	2	0	1
CNVR_5908	DEL	2	4	1
CNVR_5909	DEL	2	3	1
CNVR_5911	DEL	0	1	0
CNVR_5914	DEL	1	1	0
CNVR_5915	DEL	2	1	1
CNVR_5921	DEL	0	1	0
CNVR_5924	DEL	0	1	0
CNVR_5928	DEL	2	1	1
CNVR_5930	DEL	0	2	0
CNVR_5931	DEL	0	1	0
CNVR_5932	DEL	0	1	0
CNVR_5942	DEL	0	2	0
CNVR_5945	DEL	1	2	0
CNVR_5950	DEL	1	0	0
CNVR_5951	DEL	1	2	1
CNVR_5957	DEL	0	1	0
CNVR_5961	DEL	0	1	0
CNVR_5962	DEL	0	1	0
CNVR_5966	DEL	0	1	0
CNVR_5971	DEL	0	4	0
CNVR_5974	DEL	0	1	0
CNVR_5975	DEL	0	1	0
CNVR_5976	DEL	1	3	0
CNVR_5989	DEL	0	1	0
CNVR_5995	DEL	0	1	0
CNVR_5997	DEL	0	1	0
CNVR_6007	DEL	0	2	0
CNVR_6014	DEL	2	6	1
CNVR_6015	DEL	1	1	1
CNVR_6020	DEL	1	1	1
CNVR_6024	DEL	0	2	0
CNVR_6027	DEL	1	3	1
CNVR_6032	DEL	0	1	0
CNVR_6039	DEL	1	0	0
CNVR_6051	DUP	1	4	1
CNVR_6056	DEL	2	1	1
CNVR_6058	DEL	0	1	0
CNVR_6062	DEL	0	2	1
CNVR_6069	DEL	0	1	0
CNVR_6070	DEL	0	1	0
CNVR_6071	DEL	0	1	0
CNVR_6081	DEL	0	1	0
CNVR_6085	DEL	1	0	0
CNVR_6088	DUP	1	3	0
CNVR_6090	DEL	0	1	0
CNVR_6091	DEL	2	0	1
CNVR_6093	DEL	0	3	0
CNVR_6095	DEL	1	0	0
CNVR_6105	DEL	0	1	0
CNVR_6106	DEL	0	1	0
CNVR_6113	DEL	0	1	0
CNVR_6125	DEL	2	0	1
CNVR_6127	DEL	0	2	0
CNVR_6128	DEL	0	2	0
CNVR_6132	DEL	0	1	0
CNVR_6142	DEL	0	1	0
CNVR_6144	DEL	0	1	0
CNVR_6147	DEL	2	0	1
CNVR_6150	DEL	0	2	0
CNVR_6153	DEL	1	0	0
CNVR_6157	DEL	0	1	0
CNVR_6159	DEL	0	1	0
CNVR_6167	CNV	2	21	4
CNVR_6168	CNV	0	8	1
CNVR_6170	CNV	2	9	2
CNVR_6171	DEL	0	3	0
CNVR_6172	DEL	0	2	0
CNVR_6173	CNV	0	5	1
CNVR_6179	DEL	2	0	1
CNVR_6180	DEL	0	1	0
CNVR_6186	DEL	1	0	0
CNVR_6192	DEL	2	0	1
CNVR_6195	DEL	0	1	0
CNVR_6196	DEL	2	2	1
CNVR_6199	DEL	0	1	0
CNVR_6200	DEL	0	4	0
CNVR_6202	DEL	0	1	0
CNVR_6220	DEL	1	1	1
CNVR_6222	DEL	1	0	0
CNVR_6223	DEL	1	0	0
CNVR_6224	DEL	0	1	0
CNVR_6228	DEL	0	4	0
CNVR_6229	DEL	0	2	0
CNVR_6244	DEL	2	3	1
CNVR_6246	DEL	1	1	1
CNVR_6251	DEL	2	0	1
CNVR_6253	DEL	0	2	0
CNVR_6255	DEL	1	5	1
CNVR_6257	DEL	1	7	1
CNVR_6261	DEL	0	2	1
CNVR_6266	DEL	0	3	0
CNVR_6267	DEL	0	16	1
CNVR_6268	DEL	0	1	0
CNVR_6270	DEL	2	0	1
CNVR_6271	DEL	1	1	1
CNVR_6273	DEL	0	1	0
CNVR_6276	DEL	0	1	0
CNVR_6277	DEL	1	1	0
CNVR_6284	DEL	0	2	0
CNVR_6287	DEL	2	3	1
CNVR_6289	DEL	2	2	1
CNVR_6304	DEL	0	1	0
CNVR_6305	DEL	0	1	0
CNVR_6306	DEL	2	4	1
CNVR_6307	DEL	2	1	1
CNVR_6310	DEL	1	2	0
CNVR_6319	DEL	0	3	0
CNVR_6321	DEL	0	1	0
CNVR_6322	DEL	1	0	0
CNVR_6325	DEL	0	2	0
CNVR_6327	DEL	0	1	0
CNVR_6331	DEL	0	1	0
CNVR_6342	DEL	0	2	0
CNVR_6347	DEL	1	1	1
CNVR_6349	DEL	0	2	0
CNVR_6366	DEL	1	1	0
CNVR_6370	DEL	1	2	1
CNVR_6378	DEL	0	3	0
CNVR_6385	DEL	2	3	1
CNVR_6386	DEL	0	1	0
CNVR_6387	DEL	2	0	1
CNVR_6391	DEL	2	5	1
CNVR_6392	DEL	0	3	1
CNVR_6395	DEL	0	3	1
CNVR_6400	DEL	0	3	0
CNVR_6402	DEL	0	2	0
CNVR_6412	DEL	2	2	1
CNVR_6413	DEL	1	0	0
CNVR_6416	DEL	1	0	0
CNVR_6417	DEL	2	0	1
CNVR_6419	DEL	2	8	1
CNVR_6421	DEL	0	4	0
CNVR_6433	DEL	0	1	0
CNVR_6437	DEL	0	1	0
CNVR_6440	DEL	0	3	1
CNVR_6452	DEL	2	1	1
CNVR_6453	DEL	2	1	1
CNVR_6454	DEL	0	2	0
CNVR_6455	DEL	0	1	0
CNVR_6466	DEL	2	5	1
CNVR_6467	DEL	0	1	0
CNVR_6468	DEL	1	0	0
CNVR_6470	DEL	0	2	1
CNVR_6472	DEL	0	2	0
CNVR_6483	DEL	2	2	1
CNVR_6486	DEL	0	1	0
CNVR_6487	DEL	2	1	1
CNVR_6488	DEL	0	1	0
CNVR_6489	DEL	0	1	0
CNVR_6493	DEL	0	1	0
CNVR_6494	DEL	1	1	1
CNVR_6496	CNV	0	12	1
CNVR_6497	CNV	0	1	0
CNVR_6512	CNV	0	3	0
CNVR_6516	DEL	0	1	0
CNVR_6522	DEL	0	1	0
CNVR_6524	DEL	1	2	0
CNVR_6527	DEL	2	13	2
CNVR_6528	DEL	0	2	0
CNVR_6541	DEL	2	6	2
CNVR_6545	DEL	1	1	1
CNVR_6546	DEL	1	3	1
CNVR_6547	DEL	1	2	1
CNVR_6549	DEL	0	1	0
CNVR_6560	DEL	0	2	0
CNVR_6566	DEL	0	1	0
CNVR_6574	DEL	0	3	0
CNVR_6575	DEL	0	1	0
CNVR_6578	DEL	0	1	0
CNVR_6585	DEL	0	1	0
CNVR_6587	DEL	2	3	1
CNVR_6589	DEL	0	1	0
CNVR_6590	DEL	0	1	0
CNVR_6602	DEL	2	3	1
CNVR_6607	DEL	0	2	0
CNVR_6609	DEL	0	2	0
CNVR_6614	DEL	1	1	1
CNVR_6618	DEL	0	1	0
CNVR_6621	DEL	0	4	0
CNVR_6631	DEL	0	2	0
CNVR_6635	DEL	2	0	1
CNVR_6636	DEL	2	1	1
CNVR_6644	DEL	0	2	1
CNVR_6645	DEL	0	1	0
CNVR_6650	DEL	2	3	1
CNVR_6651	DEL	0	1	0
CNVR_6657	DEL	2	1	1
CNVR_6659	DEL	0	1	0
CNVR_6661	DEL	2	1	1
CNVR_6662	DEL	0	1	0
CNVR_6682	DEL	1	0	0
CNVR_6694	DEL	2	4	2
CNVR_6695	DEL	1	0	0
CNVR_6700	DEL	2	5	1
CNVR_6704	DEL	1	3	1
CNVR_6705	DEL	1	3	1
CNVR_6707	DEL	0	1	0
CNVR_6708	DEL	2	1	1
CNVR_6709	DEL	0	2	0
CNVR_6710	DEL	0	1	0
CNVR_6722	DEL	0	1	0
CNVR_6728	DEL	0	1	0
CNVR_6730	DEL	2	0	1
CNVR_6732	DEL	1	1	1
CNVR_6739	DEL	0	3	0
CNVR_6747	DEL	0	2	0
CNVR_6749	DEL	0	3	0
CNVR_6756	DEL	0	2	0
CNVR_6764	DEL	0	5	0
CNVR_6771	DEL	2	2	1
CNVR_6778	DEL	2	0	1
CNVR_6781	DEL	0	1	0
CNVR_6782	DEL	1	4	1
CNVR_6785	DEL	2	0	1
CNVR_6788	DEL	1	1	1
CNVR_6789	DEL	2	1	1
CNVR_6790	DEL	2	1	1
CNVR_6791	DEL	2	0	1
CNVR_6793	DEL	0	3	0
CNVR_6795	DEL	0	1	0
CNVR_6796	DEL	0	2	0
CNVR_6798	DEL	2	3	2
CNVR_6799	DEL	0	1	0
CNVR_6807	DEL	2	2	1
CNVR_6808	DEL	2	0	1
CNVR_6818	DEL	2	1	1
CNVR_6822	DEL	0	1	0
CNVR_6827	DEL	1	0	0
CNVR_6829	DEL	1	2	0
CNVR_6836	DEL	0	2	0
CNVR_6838	DEL	0	2	0
CNVR_6842	DEL	1	4	0
CNVR_6844	DEL	0	1	0
CNVR_6845	DEL	1	2	0
CNVR_6846	DEL	1	0	0
CNVR_6849	DEL	2	4	1
CNVR_6850	DEL	0	3	0
CNVR_6852	DEL	0	1	0
CNVR_6854	DEL	0	2	0
CNVR_6858	DEL	1	0	0
CNVR_6860	DEL	0	1	0
CNVR_6862	DEL	1	0	0
CNVR_6865	DEL	0	2	1
CNVR_6871	DEL	1	0	0
CNVR_6874	DEL	1	0	0
CNVR_6877	DEL	0	1	0
CNVR_6880	DEL	0	2	0
CNVR_6881	DUP	0	2	0
CNVR_6888	DEL	2	6	1
CNVR_6896	DEL	0	1	0
CNVR_6902	DEL	0	1	0
CNVR_6909	DEL	1	1	1
CNVR_6914	DEL	2	0	1
CNVR_6919	DEL	0	1	0
CNVR_6920	DEL	2	5	1
CNVR_6922	DEL	0	1	0
CNVR_6923	DEL	0	4	0
CNVR_6929	DEL	0	1	0
CNVR_6933	DEL	0	2	0
CNVR_6950	DEL	0	1	0
CNVR_6952	DEL	2	0	1
CNVR_6955	DEL	2	0	1
CNVR_6961	DEL	0	2	0
CNVR_6962	DEL	0	1	0
CNVR_6968	DEL	0	1	0
CNVR_6969	CNV	0	1	0
CNVR_6975	CNV	0	1	0
CNVR_6977	DEL	0	1	0
CNVR_6980	DEL	0	2	0
CNVR_6987	CNV	0	4	0
CNVR_6988	CNV	0	2	0
CNVR_6989	DEL	0	1	0
CNVR_6990	DEL	0	1	0
CNVR_7005	DEL	0	1	0
CNVR_7020	DEL	0	1	0
CNVR_7024	DEL	0	3	1
CNVR_7034	DEL	2	3	2
CNVR_7047	DEL	0	1	0
CNVR_7049	DEL	0	1	0
CNVR_7053	DEL	2	0	1
CNVR_7075	DEL	1	1	1
CNVR_7082	DEL	1	0	0
CNVR_7086	DEL	0	1	0
CNVR_7088	CNV	0	1	0
CNVR_7089	DEL	0	2	0
CNVR_7090	DEL	0	1	0
CNVR_7091	DEL	0	1	0
CNVR_7094	DEL	0	1	0
CNVR_7097	DEL	0	1	0
CNVR_7098	DEL	0	1	0
CNVR_7102	DEL	0	1	0
CNVR_7103	DEL	0	1	0
CNVR_7107	DEL	0	1	0
CNVR_7108	DEL	0	1	0
CNVR_7119	DEL	2	4	1
CNVR_7133	DEL	0	1	0
CNVR_7134	DEL	2	1	1
CNVR_7139	DEL	0	1	0
CNVR_7143	DEL	1	0	0
CNVR_7144	CNV	0	1	0
CNVR_7154	DEL	1	0	0
CNVR_7158	DEL	1	0	0
CNVR_7161	DEL	0	1	0
CNVR_7163	DEL	0	1	0
CNVR_7165	DEL	0	2	0
CNVR_7174	DEL	2	0	1
CNVR_7175	DEL	2	0	1
CNVR_7191	DEL	2	8	2
CNVR_7193	DEL	2	2	1
CNVR_7196	DEL	0	2	0
CNVR_7197	DEL	2	4	1
CNVR_7207	DEL	0	1	0
CNVR_7213	DEL	0	1	0
CNVR_7214	DEL	0	1	0
CNVR_7215	DEL	2	0	1
CNVR_7216	DEL	1	3	1
CNVR_7220	DEL	0	1	0
CNVR_7222	DEL	2	0	1
CNVR_7224	DEL	0	1	0
CNVR_7230	DEL	1	0	0
CNVR_7231	DEL	0	2	0
CNVR_7232	DEL	0	2	0
CNVR_7233	DEL	1	1	1
CNVR_7234	DEL	0	5	0
CNVR_7236	DEL	0	2	0
CNVR_7238	DEL	1	1	0
CNVR_7243	DEL	2	2	1
CNVR_7246	DEL	2	7	1
CNVR_7249	DEL	2	0	1
CNVR_7251	DEL	1	0	0
CNVR_7253	DEL	2	3	1
CNVR_7254	DEL	0	2	1
CNVR_7261	DEL	2	1	1
CNVR_7262	DUP	0	1	0
CNVR_7269	DEL	0	2	1
CNVR_7274	DEL	1	1	1
CNVR_7281	DEL	0	1	0
CNVR_7283	DEL	0	1	0
CNVR_7285	DEL	2	0	1
CNVR_7287	DEL	1	1	1
CNVR_7293	DEL	1	0	0
CNVR_7296	DEL	2	0	1
CNVR_7298	DEL	0	1	0
CNVR_7303	DEL	0	1	0
CNVR_7306	DEL	0	1	0
CNVR_7309	DEL	0	1	0
CNVR_7310	DEL	0	1	0
CNVR_7312	DEL	2	1	1
CNVR_7325	DEL	0	3	0
CNVR_7340	DEL	0	2	0
CNVR_7343	DEL	2	2	1
CNVR_7349	DEL	0	1	0
CNVR_7356	DEL	0	1	0
CNVR_7367	DEL	0	2	0
CNVR_7373	DEL	0	5	0
CNVR_7374	DEL	0	1	0
CNVR_7387	DEL	1	1	0
CNVR_7397	DEL	0	1	0
CNVR_7399	DEL	2	0	1
CNVR_7402	DEL	0	2	0
CNVR_7408	DEL	0	1	0
CNVR_7417	DEL	0	2	1
CNVR_7420	DEL	1	2	1
CNVR_7424	DEL	0	1	0
CNVR_7425	DEL	1	1	1
CNVR_7429	DEL	1	0	0
CNVR_7445	DEL	0	1	0
CNVR_7453	DEL	2	1	1
CNVR_7454	DEL	0	1	0
CNVR_7466	DEL	0	1	0
CNVR_7467	DEL	0	1	0
CNVR_7473	DEL	0	2	0
CNVR_7475	DEL	0	1	0
CNVR_7476	DEL	0	3	1
CNVR_7481	DEL	0	1	0
CNVR_7484	DEL	0	1	0
CNVR_7486	DEL	2	1	1
CNVR_7487	CNV	2	0	1
CNVR_7498	CNV	0	1	0
CNVR_7502	CNV	0	1	0
CNVR_7507	DEL	0	1	0
CNVR_7509	DEL	0	2	0
CNVR_7510	DEL	1	0	0
CNVR_7511	DEL	0	1	0
CNVR_7522	DEL	0	2	0
CNVR_7524	DEL	2	1	1
CNVR_7531	DEL	0	1	0
CNVR_7533	DEL	0	2	0
CNVR_7535	DEL	1	2	1
CNVR_7537	DEL	1	2	1
CNVR_7546	DEL	0	4	0
CNVR_7547	DEL	0	1	0
CNVR_7552	DEL	0	1	0
CNVR_7564	DEL	0	1	0
CNVR_7566	DEL	0	2	0
CNVR_7569	DEL	2	1	1
CNVR_7578	DEL	2	0	1
CNVR_7580	DEL	0	1	0
CNVR_7581	DEL	0	2	0
CNVR_7591	DEL	1	0	0
CNVR_7592	DEL	1	3	0
CNVR_7595	DEL	2	4	2
CNVR_7604	DEL	0	1	0
CNVR_7605	DEL	0	1	0
CNVR_7608	DEL	2	0	1
CNVR_7613	DEL	0	1	0
CNVR_7614	DEL	2	1	1
CNVR_7617	DEL	1	3	0
CNVR_7619	DEL	0	2	1
CNVR_7623	DEL	0	2	0
CNVR_7624	DEL	1	1	0
CNVR_7625	DEL	1	1	0
CNVR_7630	DEL	1	0	0
CNVR_7631	DEL	1	0	0
CNVR_7632	DEL	1	0	0
CNVR_7634	DEL	0	2	0
CNVR_7647	DEL	2	0	1
CNVR_7648	DEL	0	1	0
CNVR_7651	DEL	1	1	0
CNVR_7654	DEL	0	1	0
CNVR_7656	DEL	0	1	0
CNVR_7662	DEL	1	1	0
CNVR_7666	DEL	0	2	1
CNVR_7671	DEL	2	1	1
CNVR_7686	DEL	2	4	1
CNVR_7690	DEL	0	1	0
CNVR_7691	DEL	0	1	0
CNVR_7692	DEL	1	1	1
CNVR_7694	DEL	0	2	0
CNVR_7695	DEL	0	1	0
CNVR_7703	DEL	0	3	0
CNVR_7705	DEL	2	7	1
CNVR_7716	DEL	2	4	1
CNVR_7726	DEL	2	3	1
CNVR_7752	DEL	0	3	0
CNVR_7755	DEL	0	1	0
CNVR_7757	DEL	1	0	0
CNVR_7760	DEL	0	1	0
CNVR_7778	CNV	0	1	0
CNVR_7780	DEL	0	1	0
CNVR_7784	DEL	0	1	0
CNVR_7786	DEL	0	1	0
CNVR_7792	DEL	2	5	2
CNVR_7795	DEL	0	1	0
CNVR_7798	DEL	0	1	0
CNVR_7800	DEL	2	6	1
CNVR_7801	DUP	0	1	0
CNVR_7808	DEL	1	2	1
CNVR_7812	DEL	2	2	1
CNVR_7813	DEL	0	1	0
CNVR_7824	DEL	0	2	0
CNVR_7828	DEL	0	1	0
CNVR_7829	DEL	0	1	0
CNVR_7833	DEL	0	1	0
CNVR_7837	DEL	2	7	1
CNVR_7840	DEL	2	5	1
CNVR_7853	DEL	2	0	1
CNVR_7856	DUP	0	1	0
CNVR_7859	DEL	0	1	0
CNVR_7860	DEL	0	1	0
CNVR_7862	DUP	0	1	0
CNVR_7865	DEL	2	0	1
CNVR_7869	DEL	0	1	0
CNVR_7870	DEL	0	1	0
CNVR_7871	DUP	1	0	0
CNVR_7872	DEL	0	1	0
CNVR_7877	DEL	2	0	1
CNVR_7879	DEL	0	2	0
CNVR_7883	DUP	0	2	1
CNVR_7886	DUP	1	1	1
CNVR_7888	DEL	2	7	2
CNVR_7892	DEL	0	1	0
CNVR_7895	DEL	1	2	1
CNVR_7897	DEL	0	1	0
CNVR_7898	DEL	1	1	0
CNVR_7899	DEL	2	5	1
CNVR_7900	DEL	2	3	1
CNVR_7901	DEL	2	9	2
CNVR_7905	DEL	2	4	1
CNVR_7906	DEL	0	1	0
CNVR_7909	DEL	0	4	0
CNVR_7911	DEL	1	1	1
CNVR_7918	DEL	1	3	1
CNVR_7920	DEL	0	1	0
CNVR_7922	DEL	2	5	1
CNVR_7927	DEL	0	3	0
CNVR_7933	DEL	0	2	0
CNVR_7943	DEL	0	1	0
CNVR_7944	DEL	0	1	0
CNVR_7949	DEL	2	0	1
CNVR_7961	DEL	1	0	0
CNVR_7963	DEL	0	1	0
CNVR_7964	DUP	0	1	0
CNVR_7970	DEL	1	0	0
CNVR_7973	DEL	0	1	0
CNVR_7984	DEL	0	1	0
CNVR_7994	DEL	0	1	0
CNVR_7999	DEL	0	2	0
CNVR_8000	DEL	2	2	1
CNVR_8003	DEL	1	0	0
CNVR_8011	DEL	2	7	2
CNVR_8018	DEL	0	1	0
CNVR_8021	DEL	0	8	1
CNVR_8028	DEL	0	1	0
CNVR_8029	DEL	0	1	0
CNVR_8030	DEL	2	0	1
CNVR_8032	DEL	0	1	0
CNVR_8035	DEL	0	6	1
CNVR_8050	DEL	0	1	0
CNVR_8053	DEL	0	2	0
CNVR_8058	DEL	2	2	1
CNVR_8059	DEL	2	4	1
CNVR_8066	DEL	2	4	1
CNVR_8070	DEL	0	1	0
CNVR_8073	DEL	0	1	0
CNVR_8075	DEL	2	2	1
CNVR_8078	DEL	0	1	0
CNVR_8084	DEL	1	0	0
CNVR_8085	DEL	0	3	0
CNVR_8094	DEL	1	0	0
CNVR_8110	DEL	0	1	0
[truncated: 2,599 more rows]
