# Supplementary material for: Identification of copy number variation in French dairy and beef breeds using next-generation sequencing
Source: Genet Sel Evol. 2017 Oct 24;49:77. doi: 10.1186/s12711-017-0352-z (PMC5655909; doi:10.1186/s12711-017-0352-z)
Supplement: Supplementary file 7 — Additional file 7: Table S6. Variants identified by the array-based CGH approach. This table provides details on variants identified using the array-based CGH approach for 17 animals compared to whole-genome sequencing variants. [file 12711_2017_352_MOESM7_ESM.xlsx]

## Sheet: Table S6
Additional File 7 Table S6 Variants identified by the array-based CGH approach
CGH_CNVR_ID	BTA	CNVR_start	CNVR_end	CNVR_size	CNV_type	Animal	Breed	CNV_Animal_start	CNV_animal_end	#Probes	Duplication_Log_Ratio	Deletion_Log_Ratio	p-value	# whole-genome sequences tools	Tools	Whole-genome sequence events (RO>=50%)	Whole-genome sequence events (RO>=1%)
CGH_CNVR_1	1	31837402	31888739	51338	DEL	LIM33	Limousine	31837402	31888739	3	0	-1.249581	3.777e-15	0		NO	NO
CGH_CNVR_2	1	70783140	70793636	10497	DEL	MON45	Montbéliarde	70783140	70793636	3	0	-1.514838	4.009e-14	0		NO	NO
CGH_CNVR_3	10	9232274	9251890	19617	DEL	MON34	Montbéliarde	9232274	9251890	4	0	-1.449345	1.002e-15	0		NO	NO
CGH_CNVR_4	10	17770657	17786297	15641	DUP	LIM29	Limousine	17770657	17786297	3	1.124711	0	1.126e-10	3	CNVnator; DELLY; Pindel	YES	YES
CGH_CNVR_5	10	22049163	25734151	3684989	DUP	MON45	Montbéliarde	22049163	25734151	72	0.278242	0	1.026e-12	1	DELLY	YES	YES
CGH_CNVR_5	10	22049163	25734151	3684989	DUP	LIM30	Limousine	23898916	24071965	3	0.877441	0	3.216e-11	1	DELLY	YES	YES
CGH_CNVR_6	10	93437582	93455486	17905	DEL	LIM24	Limousine	93437582	93455486	4	0	-1.203913	2.110e-15	0		NO	YES
CGH_CNVR_7	12	48909391	48948053	38663	DUP	LIM24	Limousine	48909391	48948053	3	1.078231	0	5.837e-10	0		NO	NO
CGH_CNVR_8	12	67535856	67578272	42417	DEL	HOL17	Holstein	67535856	67578272	3	0	-5.392118	1.699e-55	3	BreakDancer; CNVnator; DELLY	YES	YES
CGH_CNVR_9	12	70332396	72086338	1753943	DEL	LIM33	Limousine	70332396	70492694	4	0	-0.913707	3.544e-11	1	CNVnator	NO	YES
CGH_CNVR_9	12	70332396	72086338	1753943	DEL	HOL17	Holstein	70390163	72086338	4	0	-1.767356	3.598e-23	2	BreakDancer; DELLY	NO	YES
CGH_CNVR_10	12	72431242	73564785	1133544	DEL	NOR32	Normande	72431242	72501887	5	0	-3.384347	6.537e-39	0		YES	YES
CGH_CNVR_10	12	72431242	73564785	1133544	DUP	MON10	Montbéliarde	72431242	72501887	5	1.024837	0	1.734e-12	0		YES	YES
CGH_CNVR_10	12	72431242	73564785	1133544	DUP	LIM33	Limousine	72472267	73551278	4	0.994362	0	6.947e-15	2	DELLY; Pindel	YES	YES
CGH_CNVR_10	12	72431242	73564785	1133544	DUP	LIM36	Limousine	72431242	73551278	6	0.938784	0	4.203e-20	0	DELLY; Pindel	YES	YES
CGH_CNVR_10	12	72431242	73564785	1133544	DUP	LIM24	Limousine	72431242	73564785	7	1.141431	0	2.522e-22	1	DELLY	YES	YES
CGH_CNVR_10	12	72431242	73564785	1133544	DUP	LIM34	Limousine	72431242	73551278	6	0.99298	0	8.765e-16	2	DELLY; Pindel	YES	YES
CGH_CNVR_10	12	72431242	73564785	1133544	DUP	MON34	Montbéliarde	72431242	72501887	5	1.043549	0	4.885e-10	0		YES	YES
CGH_CNVR_10	12	72431242	73564785	1133544	DUP	MON45	Montbéliarde	72431242	72501887	5	1.005872	0	1.252e-10	0		YES	YES
CGH_CNVR_10	12	72431242	73564785	1133544	DUP	LIM30	Limousine	72431242	72501887	5	0.94181	0	2.641e-17	0		YES	YES
CGH_CNVR_10	12	72431242	73564785	1133544	DUP	LIM23	Limousine	72431242	73564785	7	0.812747	0	7.483e-11	2	DELLY; Pindel	YES	YES
CGH_CNVR_10	12	72431242	73564785	1133544	DUP	LIM29	Limousine	72443396	72501887	4	1.050406	0	5.336e-10	0		YES	YES
CGH_CNVR_10	12	72431242	73564785	1133544	DUP	LIM21	Limousine	72431242	72501887	5	0.907554	0	1.987e-10	0		YES	YES
CGH_CNVR_11	13	2451511	2474131	22621	DEL	NOR24	Normande	2451511	2474131	3	0	-1.189452	1.039e-11	0		NO	NO
CGH_CNVR_12	13	7299550	7962760	663211	DUP	LIM24	Limousine	7299550	7962760	67	0.569155	0	2.109e-52	0		NO	YES
CGH_CNVR_13	13	18648123	18676710	28588	DUP	LIM21	Limousine	18648123	18676710	5	0.933036	0	4.274e-11	0		NO	NO
CGH_CNVR_14	14	14512746	15364511	851766	DEL	LIM28	Limousine	14512746	15364511	3	0	-1.144173	3.574e-11	2	BreakDancer; DELLY	YES	YES
CGH_CNVR_14	14	14512746	15364511	851766	DEL	NOR24	Normande	14512746	15364511	3	0	-1.564591	1.425e-14	2	DELLY	YES	YES
CGH_CNVR_15	14	79167274	79323930	156657	DEL	NOR36	Normande	79167274	79323930	6	0	-0.972055	5.734e-12	1	CNVnator	YES	YES
CGH_CNVR_16	15	46579146	46984462	405317	DUP	LIM33	Limousine	46579146	46984462	4	0.871504	0	6.439e-12	0		NO	YES
CGH_CNVR_17	15	47822936	48000274	177339	DEL	MON10	Montbéliarde	47822936	47910811	5	0	-0.897179	1.870e-10	4	BreakDancer; CNVnator; DELLY; Pindel	YES	YES
CGH_CNVR_17	15	47822936	48000274	177339	DEL	LIM33	Limousine	47840062	47910811	3	0	-0.936993	3.261e-10	3	CNVnator; DELLY; Pindel	YES	YES
CGH_CNVR_17	15	47822936	48000274	177339	DEL	LIM24	Limousine	47822936	47897329	4	0	-2.411907	3.660e-39	1	CNVnator	YES	YES
CGH_CNVR_17	15	47822936	48000274	177339	DEL	MON34	Montbéliarde	47822936	47910811	5	0	-1.256738	6.893e-15	3	CNVnator; DELLY; Pindel	YES	YES
CGH_CNVR_17	15	47822936	48000274	177339	DEL	NOR32	Normande	47822936	47910811	5	0	-0.941763	7.280e-11	3	BreakDancer; CNVnator; DELLY	YES	YES
CGH_CNVR_17	15	47822936	48000274	177339	DEL	LIM30	Limousine	47822936	47910811	5	0	-1.758921	3.261e-42	3	BreakDancer; CNVnator; DELLY	YES	YES
CGH_CNVR_17	15	47822936	48000274	177339	DEL	LIM29	Limousine	47822936	48000274	6	0	-0.797276	1.875e-10	0		YES	YES
CGH_CNVR_18	15	65107773	65144061	36289	DUP	NOR24	Normande	65107773	65144061	4	1.312787	0	2.834e-16	0		NO	YES
CGH_CNVR_19	15	80584467	80810178	225712	DUP	LIM33	Limousine	80584467	80810178	5	0.875927	0	6.532e-13	1	CNVnator	YES	YES
CGH_CNVR_19	15	80584467	80810178	225712	DUP	LIM35	Limousine	80584467	80810178	5	1.177036	0	1.961e-10	0		YES	YES
CGH_CNVR_19	15	80584467	80810178	225712	DUP	LIM36	Limousine	80584467	80810178	5	1.056214	0	3.377e-16	2	CNVnator; DELLY	YES	YES
CGH_CNVR_19	15	80584467	80810178	225712	DUP	HOL17	Holstein	80596744	80810178	4	1.101182	0	1.071e-10	1	CNVnator	YES	YES
CGH_CNVR_20	16	5739782	5813243	73462	DEL	LIM36	Limousine	5739782	5764365	3	0	-1.583001	1.234e-16	0		NO	YES
CGH_CNVR_20	16	5739782	5813243	73462	DEL	MON34	Montbéliarde	5739782	5813243	4	0	-1.964986	3.974e-22	1	CNVnator	NO	YES
CGH_CNVR_21	16	8574071	8619021	44951	DEL	LIM33	Limousine	8585939	8619021	3	0	-1.046052	8.155e-13	1	CNVnator	NO	YES
CGH_CNVR_21	16	8574071	8619021	44951	DEL	LIM30	Limousine	8585939	8619021	3	0	-0.934383	4.829e-13	1	CNVnator	NO	YES
CGH_CNVR_21	16	8574071	8619021	44951	DEL	LIM23	Limousine	8574071	8619021	4	0	-1.048029	2.148e-12	1	CNVnator	NO	YES
CGH_CNVR_22	17	15425285	15469499	44215	DEL	LIM36	Limousine	15425285	15469499	3	0	-0.776724	5.653e-10	0	CNVnator	YES	YES
CGH_CNVR_22	17	15425285	15469499	44215	DEL	LIM28	Limousine	15425285	15469499	3	0	-0.922289	5.036e-10	1	CNVnator	YES	YES
CGH_CNVR_22	17	15425285	15469499	44215	DEL	NOR32	Normande	15425285	15469499	3	0	-1.405638	2.273e-12	1	CNVnator	YES	YES
CGH_CNVR_22	17	15425285	15469499	44215	DEL	LIM30	Limousine	15425285	15469499	3	0	-0.778833	4.180e-10	1	CNVnator	YES	YES
CGH_CNVR_23	18	13363218	13440714	77497	DUP	LIM34	Limousine	13363218	13440714	11	0.782009	0	3.933e-20	1	CNVnator	YES	YES
CGH_CNVR_24	18	51768427	51774205	5779	DUP	MON34	Montbéliarde	51768427	51774205	3	1.328933	0	6.199e-10	0		NO	YES
CGH_CNVR_25	18	57657794	57707058	49265	DEL	LIM36	Limousine	57657794	57707058	4	0	-1.106498	7.292e-22	0		YES	YES
CGH_CNVR_25	18	57657794	57707058	49265	DUP	MON10	Montbéliarde	57657794	57707058	4	1.69808	0	1.331e-26	2	CNVnator; DELLY	YES	YES
CGH_CNVR_25	18	57657794	57707058	49265	DUP	MON34	Montbéliarde	57657794	57707058	4	1.561894	0	5.727e-18	2	CNVnator; DELLY	YES	YES
CGH_CNVR_25	18	57657794	57707058	49265	DUP	NOR24	Normande	57657794	57707058	4	1.042737	0	5.892e-12	0		YES	YES
CGH_CNVR_25	18	57657794	57707058	49265	DUP	NOR32	Normande	57657794	57695394	3	1.115314	0	1.036e-10	1	CNVnator	YES	YES
CGH_CNVR_25	18	57657794	57707058	49265	DUP	NOR36	Normande	57657794	57707058	4	1.350537	0	5.642e-17	0		YES	YES
CGH_CNVR_25	18	57657794	57707058	49265	DUP	LIM30	Limousine	57657794	57695394	3	1.114808	0	2.191e-17	1	CNVnator	YES	YES
CGH_CNVR_26	18	61599551	61924621	325071	DEL	MON10	Montbéliarde	61776628	61924621	5	0	-1.2443	2.304e-14	3	BreakDancer; CNVnator; DELLY	YES	YES
CGH_CNVR_26	18	61599551	61924621	325071	DEL	MON45	Montbéliarde	61776628	61924621	5	0	-1.216618	1.124e-12	1	CNVnator	YES	YES
CGH_CNVR_26	18	61599551	61924621	325071	DUP	NOR36	Normande	61599551	61924621	11	0.676565	0	1.483e-11	1	DELLY	YES	YES
CGH_CNVR_27	19	1870588	2185853	315266	DEL	NOR32	Normande	1870588	2185853	14	0	-0.619244	2.287e-11	0		NO	NO
CGH_CNVR_28	19	5418472	5535035	116564	DEL	LIM24	Limousine	5418472	5535035	8	0	-0.912382	2.018e-17	0		YES	YES
CGH_CNVR_28	19	5418472	5535035	116564	DEL	LIM21	Limousine	5418472	5479756	5	0	-1.161733	3.134e-16	1	CNVnator	YES	YES
CGH_CNVR_29	2	6749953	6819749	69797	DEL	LIM34	Limousine	6749953	6775362	3	0	-1.177292	2.977e-13	0		NO	YES
CGH_CNVR_29	2	6749953	6819749	69797	DEL	NOR32	Normande	6749953	6819749	8	0	-0.789587	1.106e-10	0		NO	YES
CGH_CNVR_30	2	83294137	83344503	50367	DEL	LIM28	Limousine	83294137	83344503	3	0	-0.970378	1.151e-10	0		NO	NO
CGH_CNVR_31	22	6205317	6506259	300943	DEL	LIM30	Limousine	6205317	6506259	12	0	-0.835317	4.874e-34	2	CNVnator; DELLY	YES	YES
CGH_CNVR_32	23	25200404	26688261	1487858	DEL	MON10	Montbéliarde	25360595	25420318	11	0	-3.708367	1.103e-140	0		NO	YES
CGH_CNVR_32	23	25200404	26688261	1487858	DEL	MON10	Montbéliarde	25360595	25384714	4	0	-5.870674	7.945e-12	0		NO	YES
CGH_CNVR_32	23	25200404	26688261	1487858	DEL	LIM33	Limousine	25360595	25420318	11	0	-2.320317	9.896e-74	1	CNVnator	NO	YES
CGH_CNVR_32	23	25200404	26688261	1487858	DEL	LIM33	Limousine	25360595	25384714	4	0	-4.255652	3.370e-12	1	CNVnator	NO	YES
CGH_CNVR_32	23	25200404	26688261	1487858	DEL	LIM35	Limousine	25360595	25416713	10	0	-3.191976	6.870e-107	1	CNVnator	NO	YES
CGH_CNVR_32	23	25200404	26688261	1487858	DEL	LIM36	Limousine	25360595	25420318	11	0	-2.500462	6.611e-97	0		NO	YES
CGH_CNVR_32	23	25200404	26688261	1487858	DEL	LIM28	Limousine	25350695	25416713	11	0	-0.748823	1.319e-20	2	CNVnator; DELLY	NO	YES
CGH_CNVR_32	23	25200404	26688261	1487858	DEL	LIM24	Limousine	25350695	25410972	10	0	-0.917913	1.504e-21	1	CNVnator	NO	YES
CGH_CNVR_32	23	25200404	26688261	1487858	DEL	HOL17	Holstein	25360595	25410972	9	0	-3.776032	1.607e-124	0		NO	YES
CGH_CNVR_32	23	25200404	26688261	1487858	DEL	LIM34	Limousine	25200404	26688261	55	0	-0.367317	1.473e-20	0		NO	YES
CGH_CNVR_32	23	25200404	26688261	1487858	DEL	MON34	Montbéliarde	25360595	25416713	10	0	-4.181652	1.212e-147	0		NO	YES
CGH_CNVR_32	23	25200404	26688261	1487858	DEL	NOR24	Normande	25360595	25410972	9	0	-3.336973	1.072e-107	0		NO	YES
CGH_CNVR_32	23	25200404	26688261	1487858	DEL	NOR24	Normande	25360595	25384714	4	0	-5.66889	8.502e-13	0		NO	YES
CGH_CNVR_32	23	25200404	26688261	1487858	DEL	NOR32	Normande	25360595	25430920	12	0	-0.813477	4.771e-20	1	CNVnator	NO	YES
CGH_CNVR_32	23	25200404	26688261	1487858	DEL	MON45	Montbéliarde	25360595	25420318	11	0	-3.365945	7.777e-116	1	CNVnator	NO	YES
CGH_CNVR_32	23	25200404	26688261	1487858	DEL	NOR36	Normande	25350695	25410972	10	0	-4.600031	5.276e-165	1	CNVnator	NO	YES
CGH_CNVR_32	23	25200404	26688261	1487858	DEL	LIM30	Limousine	25360595	25420318	11	0	-0.758064	1.137e-26	1	CNVnator	NO	YES
CGH_CNVR_32	23	25200404	26688261	1487858	DEL	LIM23	Limousine	25360595	25416713	10	0	-2.45463	3.303e-75	1	CNVnator	NO	YES
CGH_CNVR_32	23	25200404	26688261	1487858	DEL	LIM23	Limousine	25360595	25384714	4	0	-4.304686	4.517e-10	1	CNVnator	NO	YES
CGH_CNVR_32	23	25200404	26688261	1487858	DEL	LIM29	Limousine	25350695	25416713	11	0	-2.321518	7.498e-75	1	CNVnator	NO	YES
CGH_CNVR_32	23	25200404	26688261	1487858	DEL	LIM21	Limousine	25325421	25420318	13	0	-0.846747	1.032e-21	1	CNVnator	NO	YES
CGH_CNVR_33	23	25451299	26595139	1143841	DEL	MON10	Montbéliarde	25847141	25877317	6	0	-1.729261	1.018e-39	0		YES	YES
CGH_CNVR_33	23	25451299	26595139	1143841	DEL	LIM33	Limousine	25793489	26544080	8	0	-1.039514	1.832e-26	2	DELLY; Pindel	YES	YES
CGH_CNVR_33	23	25451299	26595139	1143841	DEL	LIM36	Limousine	25793489	26544080	8	0	-0.84628	6.090e-23	0	DELLY	YES	YES
CGH_CNVR_33	23	25451299	26595139	1143841	DEL	HOL17	Holstein	25847141	25868395	5	0	-1.124738	2.024e-13	0		YES	YES
CGH_CNVR_33	23	25451299	26595139	1143841	DEL	MON34	Montbéliarde	25847141	26544080	7	0	-1.608101	6.403e-29	1	DELLY	YES	YES
CGH_CNVR_33	23	25451299	26595139	1143841	DEL	NOR24	Normande	25451299	26544080	28	0	-0.441076	4.102e-14	0		YES	YES
CGH_CNVR_33	23	25451299	26595139	1143841	DEL	NOR32	Normande	25847141	25859863	3	0	-1.905349	2.195e-23	0		YES	YES
CGH_CNVR_33	23	25451299	26595139	1143841	DEL	MON45	Montbéliarde	25847141	25877317	6	0	-1.44704	7.752e-25	1	CNVnator	YES	YES
CGH_CNVR_33	23	25451299	26595139	1143841	DEL	NOR36	Normande	25793489	25863603	5	0	-1.442788	1.107e-22	1	CNVnator	YES	YES
CGH_CNVR_33	23	25451299	26595139	1143841	DEL	LIM30	Limousine	25793489	26544080	8	0	-0.724456	3.770e-18	0		YES	YES
CGH_CNVR_33	23	25451299	26595139	1143841	DEL	LIM23	Limousine	25793489	25859863	4	0	-1.223973	2.860e-16	1	CNVnator	YES	YES
CGH_CNVR_33	23	25451299	26595139	1143841	DEL	LIM29	Limousine	25451299	26544080	28	0	-0.41024	2.377e-11	0		YES	YES
CGH_CNVR_33	23	25451299	26595139	1143841	DEL	LIM21	Limousine	25670733	26595139	10	0	-0.680819	6.127e-11	0		YES	YES
CGH_CNVR_34	23	27697338	27713086	15749	DEL	LIM28	Limousine	27697338	27713086	3	0	-1.197361	1.078e-12	0		NO	YES
CGH_CNVR_34	23	27697338	27713086	15749	DEL	NOR36	Normande	27697338	27713086	3	0	-1.467548	3.062e-15	0		NO	YES
CGH_CNVR_34	23	27697338	27713086	15749	DEL	LIM30	Limousine	27697338	27713086	3	0	-1.476448	2.081e-20	0		NO	YES
CGH_CNVR_35	23	27853564	27898163	44600	DUP	LIM34	Limousine	27853564	27898163	3	1.035868	0	1.282e-10	0		YES	YES
CGH_CNVR_36	23	28404860	28504464	99605	DEL	MON10	Montbéliarde	28486256	28504464	3	0	-2.30258	1.531e-26	1	DELLY	YES	YES
CGH_CNVR_36	23	28404860	28504464	99605	DEL	LIM33	Limousine	28435143	28486315	4	0	-1.350025	2.022e-13	1	CNVnator	YES	YES
CGH_CNVR_36	23	28404860	28504464	99605	DEL	MON34	Montbéliarde	28486256	28504464	3	0	-1.988483	2.217e-17	0		YES	YES
CGH_CNVR_36	23	28404860	28504464	99605	DEL	MON45	Montbéliarde	28486256	28504464	3	0	-2.505303	2.068e-28	1	DELLY	YES	YES
CGH_CNVR_36	23	28404860	28504464	99605	DEL	NOR36	Normande	28486256	28504464	3	0	-2.770916	8.329e-32	0		YES	YES
CGH_CNVR_36	23	28404860	28504464	99605	DEL	LIM30	Limousine	28404860	28486315	7	0	-0.83463	3.612e-17	0		YES	YES
CGH_CNVR_37	23	30131524	30145406	13883	DEL	LIM36	Limousine	30131524	30145406	3	0	-0.808322	4.017e-10	0		NO	NO
CGH_CNVR_38	24	6893522	6924356	30835	DEL	MON34	Montbéliarde	6893522	6924356	3	0	-1.386675	3.254e-10	0		NO	YES
CGH_CNVR_38	24	6893522	6924356	30835	DEL	MON45	Montbéliarde	6893522	6924356	3	0	-1.273173	2.185e-10	0		NO	YES
CGH_CNVR_38	24	6893522	6924356	30835	DEL	LIM30	Limousine	6893522	6924356	3	0	-0.829751	1.011e-10	0		NO	YES
CGH_CNVR_39	24	21444010	21479161	35152	DEL	LIM30	Limousine	21444010	21479161	5	0	-0.646079	1.169e-10	0		NO	YES
CGH_CNVR_40	24	25584046	25615810	31765	DEL	LIM29	Limousine	25584046	25615810	5	0	-0.958547	6.685e-10	4	BreakDancer; CNVnator; DELLY; Pindel	YES	YES
CGH_CNVR_41	27	40683825	40745660	61836	DEL	LIM33	Limousine	40683825	40745660	4	0	-1.029253	7.088e-14	1	CNVnator	YES	YES
CGH_CNVR_42	28	22700718	22721792	21075	DEL	NOR24	Normande	22700718	22721792	4	0	-1.114664	2.062e-13	1	CNVnator	NO	YES
CGH_CNVR_42	28	22700718	22721792	21075	DEL	NOR32	Normande	22700718	22721792	4	0	-1.188435	3.664e-14	1	CNVnator	NO	YES
CGH_CNVR_42	28	22700718	22721792	21075	DEL	NOR36	Normande	22700718	22721792	4	0	-1.176687	2.558e-13	1	CNVnator	NO	YES
CGH_CNVR_43	29	1519959	1550040	30082	DEL	LIM30	Limousine	1519959	1550040	3	0	-0.837863	1.193e-10	0		NO	NO
CGH_CNVR_44	29	5208048	5773583	565536	DUP	HOL17	Holstein	5208048	5773583	5	1.018553	0	2.548e-11	1	DELLY	YES	YES
CGH_CNVR_45	29	23491015	23555770	64756	DEL	LIM33	Limousine	23491015	23555770	5	0	-0.8549	7.281e-14	0		NO	NO
CGH_CNVR_46	29	37233437	37409533	176097	DUP	LIM30	Limousine	37233437	37409533	8	0.483629	0	2.913e-10	1	CNVnator	NO	YES
CGH_CNVR_47	3	22821933	22891076	69144	DUP	LIM33	Limousine	22821933	22891076	5	0.858796	0	4.667e-11	1	CNVnator	NO	YES
CGH_CNVR_48	3	39544862	39606596	61735	DEL	MON45	Montbéliarde	39544862	39606596	3	0	-1.348009	7.287e-12	0		NO	NO
CGH_CNVR_49	3	54371104	54465387	94284	DEL	LIM28	Limousine	54371104	54465387	3	0	-1.298448	1.588e-14	1	CNVnator	NO	YES
CGH_CNVR_50	3	93919905	94042019	122115	DEL	MON10	Montbéliarde	93919905	94001877	10	0	-0.930136	1.981e-20	0		NO	YES
CGH_CNVR_50	3	93919905	94042019	122115	DEL	LIM33	Limousine	93919905	94001877	10	0	-0.840053	2.088e-24	0		NO	YES
CGH_CNVR_50	3	93919905	94042019	122115	DEL	LIM35	Limousine	93919905	93991328	9	0	-0.927793	1.822e-11	0		NO	YES
CGH_CNVR_50	3	93919905	94042019	122115	DEL	LIM36	Limousine	93919905	94001877	10	0	-0.912111	5.900e-37	0		NO	YES
CGH_CNVR_50	3	93919905	94042019	122115	DEL	LIM28	Limousine	93919905	94001877	10	0	-0.940812	4.149e-29	0		NO	YES
CGH_CNVR_50	3	93919905	94042019	122115	DEL	LIM24	Limousine	93919905	93991328	9	0	-0.944969	1.217e-20	0		NO	YES
CGH_CNVR_50	3	93919905	94042019	122115	DEL	HOL17	Holstein	93919905	94001877	10	0	-0.981276	1.748e-19	0		NO	YES
CGH_CNVR_50	3	93919905	94042019	122115	DEL	LIM34	Limousine	93919905	94024609	11	0	-0.839604	4.160e-24	0		NO	YES
CGH_CNVR_50	3	93919905	94042019	122115	DEL	MON34	Montbéliarde	93919905	94001877	10	0	-1.017069	6.158e-19	0		NO	YES
CGH_CNVR_50	3	93919905	94042019	122115	DEL	NOR24	Normande	93919905	94001877	10	0	-0.924799	9.115e-22	0		NO	YES
CGH_CNVR_50	3	93919905	94042019	122115	DEL	NOR32	Normande	93919905	94042019	14	0	-0.851059	3.314e-23	0		NO	YES
CGH_CNVR_50	3	93919905	94042019	122115	DEL	MON45	Montbéliarde	93919905	94001877	10	0	-0.873694	8.673e-17	0		NO	YES
CGH_CNVR_50	3	93919905	94042019	122115	DEL	NOR36	Normande	93919905	94001877	10	0	-0.924752	1.402e-19	0		NO	YES
CGH_CNVR_50	3	93919905	94042019	122115	DEL	LIM30	Limousine	93919905	93991328	9	0	-0.879832	7.647e-32	0		NO	YES
CGH_CNVR_50	3	93919905	94042019	122115	DEL	LIM23	Limousine	93919905	94001877	10	0	-0.790552	7.856e-17	0		NO	YES
CGH_CNVR_50	3	93919905	94042019	122115	DEL	LIM29	Limousine	93919905	93991328	9	0	-0.865607	6.560e-17	0		NO	YES
CGH_CNVR_50	3	93919905	94042019	122115	DEL	LIM21	Limousine	93919905	93991328	9	0	-1.002834	3.866e-21	0		NO	YES
CGH_CNVR_51	3	105601131	105623644	22514	DEL	NOR32	Normande	105601131	105623644	3	0	-1.209674	1.274e-10	0		NO	NO
CGH_CNVR_52	4	57869465	57880997	11533	DEL	LIM28	Limousine	57869465	57880997	3	0	-1.427649	3.548e-20	0		NO	NO
CGH_CNVR_53	4	113642926	114148375	505450	DUP	MON10	Montbéliarde	113642926	114142726	31	0.737608	0	5.466e-38	0		NO	YES
CGH_CNVR_53	4	113642926	114148375	505450	DUP	LIM33	Limousine	113657993	114142726	29	0.773983	0	5.332e-57	0		NO	YES
CGH_CNVR_53	4	113642926	114148375	505450	DUP	LIM35	Limousine	113642926	114148375	32	1.259836	0	9.174e-65	0		NO	YES
CGH_CNVR_53	4	113642926	114148375	505450	DUP	LIM36	Limousine	113667363	114142726	28	0.657455	0	1.250e-52	0		NO	YES
CGH_CNVR_53	4	113642926	114148375	505450	DUP	LIM28	Limousine	113648360	114142726	30	1.060256	0	5.149e-100	0		NO	YES
CGH_CNVR_53	4	113642926	114148375	505450	DUP	LIM24	Limousine	113648360	114148375	31	1.282677	0	1.572e-116	0		NO	YES
CGH_CNVR_53	4	113642926	114148375	505450	DUP	HOL17	Holstein	113734857	114142726	24	0.778076	0	2.737e-28	0		NO	YES
CGH_CNVR_53	4	113642926	114148375	505450	DUP	LIM34	Limousine	113667363	114142726	28	0.788977	0	1.457e-50	0		NO	YES
CGH_CNVR_53	4	113642926	114148375	505450	DUP	NOR24	Normande	113648360	114142726	30	0.716849	0	3.232e-37	0		NO	YES
CGH_CNVR_53	4	113642926	114148375	505450	DUP	MON45	Montbéliarde	113648360	114142726	30	0.77703	0	7.437e-37	0		NO	YES
CGH_CNVR_53	4	113642926	114148375	505450	DUP	NOR36	Normande	113734857	114142726	24	0.718109	0	2.378e-27	0		NO	YES
CGH_CNVR_53	4	113642926	114148375	505450	DUP	LIM30	Limousine	113642926	114142726	31	0.958766	0	1.332e-106	0		NO	YES
CGH_CNVR_53	4	113642926	114148375	505450	DUP	LIM23	Limousine	113648360	114142726	30	1.153357	0	2.740e-93	0		NO	YES
CGH_CNVR_53	4	113642926	114148375	505450	DUP	LIM29	Limousine	113648360	114148375	31	0.69819	0	1.168e-35	0		NO	YES
CGH_CNVR_53	4	113642926	114148375	505450	DUP	LIM21	Limousine	113642926	114148375	32	0.727891	0	9.242e-38	0		NO	YES
CGH_CNVR_54	5	44474067	44523327	49261	DEL	LIM35	Limousine	44474067	44523327	4	0	-1.294237	3.789e-10	1	CNVnator	NO	YES
CGH_CNVR_54	5	44474067	44523327	49261	DEL	LIM28	Limousine	44474067	44523327	4	0	-0.965076	3.441e-12	2	BreakDancer; DELLY	NO	YES
CGH_CNVR_54	5	44474067	44523327	49261	DEL	LIM24	Limousine	44481875	44523327	3	0	-1.246017	1.007e-12	0		NO	YES
CGH_CNVR_54	5	44474067	44523327	49261	DEL	NOR36	Normande	44474067	44523327	4	0	-0.9921	5.742e-10	0		NO	YES
CGH_CNVR_54	5	44474067	44523327	49261	DEL	LIM21	Limousine	44474067	44523327	4	0	-1.207809	2.808e-14	1	DELLY	NO	YES
CGH_CNVR_55	5	59005022	59384241	379220	DEL	MON10	Montbéliarde	59005022	59202171	4	0	-2.99408	1.890e-38	4	BreakDancer; CNVnator; DELLY; Pindel	YES	YES
CGH_CNVR_55	5	59005022	59384241	379220	DEL	LIM33	Limousine	59005022	59239457	5	0	-1.706503	1.104e-22	1	CNVnator	YES	YES
CGH_CNVR_55	5	59005022	59384241	379220	DEL	LIM34	Limousine	59005022	59239457	5	0	-1.358704	5.594e-13	2	CNVnator; DELLY	YES	YES
CGH_CNVR_55	5	59005022	59384241	379220	DEL	MON34	Montbéliarde	59005022	59384241	7	0	-0.88824	6.764e-11	1	CNVnator	YES	YES
CGH_CNVR_55	5	59005022	59384241	379220	DEL	NOR32	Normande	59005022	59202171	4	0	-2.935941	5.692e-29	1	CNVnator	YES	YES
CGH_CNVR_55	5	59005022	59384241	379220	DEL	MON45	Montbéliarde	59005022	59202171	4	0	-2.682992	7.481e-31	3	CNVnator; DELLY; Pindel	YES	YES
CGH_CNVR_55	5	59005022	59384241	379220	DEL	NOR36	Normande	59005022	59202171	4	0	-3.225776	3.617e-34	1	CNVnator	YES	YES
CGH_CNVR_56	5	59384182	59640494	256313	DEL	LIM35	Limousine	59384182	59640494	7	0	-1.043895	2.572e-11	1	CNVnator	YES	YES
CGH_CNVR_57	6	419058	498526	79469	DEL	LIM30	Limousine	419058	498526	3	0	-0.841238	5.839e-10	0		NO	YES
CGH_CNVR_58	6	55884405	56001226	116822	DEL	LIM21	Limousine	55884405	56001226	4	0	-1.032966	6.505e-11	0		NO	NO
CGH_CNVR_59	6	62750078	62942734	192657	DUP	MON10	Montbéliarde	62750078	62942734	13	0.747907	0	1.818e-17	0		NO	YES
CGH_CNVR_59	6	62750078	62942734	192657	DUP	LIM33	Limousine	62788956	62942734	11	0.719999	0	1.477e-19	0		NO	YES
CGH_CNVR_59	6	62750078	62942734	192657	DUP	LIM36	Limousine	62788956	62942734	11	0.805717	0	2.045e-30	0		NO	YES
CGH_CNVR_59	6	62750078	62942734	192657	DUP	LIM28	Limousine	62788956	62942734	11	0.691827	0	2.507e-17	0		NO	YES
CGH_CNVR_59	6	62750078	62942734	192657	DUP	LIM24	Limousine	62788956	62942734	11	0.744751	0	4.097e-16	0		NO	YES
CGH_CNVR_59	6	62750078	62942734	192657	DUP	HOL17	Holstein	62750078	62942734	13	0.692661	0	2.940e-13	0		NO	YES
CGH_CNVR_59	6	62750078	62942734	192657	DUP	LIM34	Limousine	62788956	62942734	11	0.730019	0	1.459e-17	0		NO	YES
CGH_CNVR_59	6	62750078	62942734	192657	DUP	MON34	Montbéliarde	62750078	62942734	13	0.873073	0	3.889e-20	0		NO	YES
CGH_CNVR_59	6	62750078	62942734	192657	DUP	NOR24	Normande	62750078	62942734	13	0.661945	0	4.119e-15	0		NO	YES
CGH_CNVR_59	6	62750078	62942734	192657	DUP	NOR32	Normande	62750078	62942734	13	0.584951	0	1.219e-13	0		NO	YES
CGH_CNVR_59	6	62750078	62942734	192657	DUP	MON45	Montbéliarde	62788956	62942734	11	0.749459	0	1.764e-15	0		NO	YES
CGH_CNVR_59	6	62750078	62942734	192657	DUP	NOR36	Normande	62750078	62942734	13	0.670675	0	5.800e-14	0		NO	YES
CGH_CNVR_59	6	62750078	62942734	192657	DUP	LIM30	Limousine	62788956	62942734	11	0.723876	0	5.077e-26	0		NO	YES
CGH_CNVR_59	6	62750078	62942734	192657	DUP	LIM23	Limousine	62788956	62942734	11	0.699288	0	3.169e-14	0		NO	YES
CGH_CNVR_59	6	62750078	62942734	192657	DUP	LIM29	Limousine	62750078	62942734	13	0.726345	0	4.965e-16	0		NO	YES
CGH_CNVR_59	6	62750078	62942734	192657	DUP	LIM21	Limousine	62788956	62942734	11	0.759446	0	2.286e-15	0		NO	YES
CGH_CNVR_60	6	86146883	86178901	32019	DEL	NOR24	Normande	86146883	86178901	4	0	-1.173904	1.321e-12	1	CNVnator	NO	YES
CGH_CNVR_61	7	41844972	41891511	46540	DEL	LIM24	Limousine	41844972	41891511	3	0	-1.252085	1.244e-11	0		NO	NO
CGH_CNVR_62	8	12316789	12614414	297626	DEL	NOR24	Normande	12316789	12614414	11	0	-0.936744	2.606e-24	1	CNVnator	NO	YES
CGH_CNVR_63	8	104970811	105311277	340467	DUP	MON34	Montbéliarde	104970811	105311277	29	0.456284	0	8.478e-12	0		NO	YES
CGH_CNVR_63	8	104970811	105311277	340467	DUP	LIM30	Limousine	105156057	105226505	10	0.4524	0	5.309e-11	0		NO	YES
CGH_CNVR_64	9	1487846	1550804	62959	DEL	LIM30	Limousine	1487846	1550804	5	0	-0.787646	3.504e-13	0		NO	NO
CGH_CNVR_65	9	36540334	36593414	53081	DEL	LIM33	Limousine	36540334	36593414	10	0	-0.949088	3.591e-26	1	CNVnator	YES	YES
CGH_CNVR_66	9	36661865	36679039	17175	DEL	LIM23	Limousine	36661865	36679039	4	0	-0.934397	4.361e-10	0		NO	NO
CGH_CNVR_67	9	45332958	45466585	133628	DUP	HOL17	Holstein	45332958	45466585	7	1.223556	0	4.859e-21	1	DELLY	NO	YES
CGH_CNVR_68	9	63250453	63346440	95988	DUP	MON10	Montbéliarde	63250453	63346440	17	0.511371	0	2.280e-11	1	CNVnator	YES	YES
CGH_CNVR_68	9	63250453	63346440	95988	DUP	MON45	Montbéliarde	63267204	63339747	13	0.594628	0	8.224e-11	1	CNVnator	YES	YES
DEL: Deletion, DUP: Duplication, RO: Reciprocal Overlap
