# Supplementary material for: Identification of copy number variation in French dairy and beef breeds using next-generation sequencing
Source: Genet Sel Evol. 2017 Oct 24;49:77. doi: 10.1186/s12711-017-0352-z (PMC5655909; doi:10.1186/s12711-017-0352-z)
Supplement: Supplementary file 8 — Additional file 8: Table S7. Selected variants for genotyping on the low-density Bovine BeadChip. In this table, we provide information for validated variants using the low-density Bovine BeadChip. Variants that were validated using the two in silico approaches and the array-based CGH are indicated. [file 12711_2017_352_MOESM8_ESM.xlsx]

## Sheet: Table S7
Additional File 8 Table S7 Selected variants to genotype on the Low Density Bovine BeadChip
CNVR_ID	BTA	CNVR_start	CNVR_end	CNVR_size	CNVR_type	# SNP	# tools	# total animals	# BAQ animals	# BWS animals	# CHA animals	# HOL animals	# LIM animals	# MON animals	# NOR animals	# RdP animals	Validated
CNVR_15	1	3066743	3277533	210791	DEL	6	3	10	1	1	3	1	3	0	0	1	NO
CNVR_1358	10	9975501	9995400	19900	DUP	5	2	38	0	11	14	0	5	0	2	6	NO
CNVR_1426	10	22526591	25267663	2741073	CNV	70	3	54	1	8	6	1	10	6	15	7	YES
CNVR_1427	10	22530291	24668156	2137866	CNV	66	3	45	0	6	6	1	9	6	11	6	YES
CNVR_1439	10	22833948	23577776	743829	DEL	27	3	61	0	10	8	2	11	5	17	8	YES
CNVR_1450	10	23118251	25023840	1905590	CNV	53	3	109	2	19	17	2	15	8	34	12	YES
CNVR_1475	10	24086637	25393338	1306702	DEL	17	2	11	0	1	0	0	6	0	4	0	YES
CNVR_2062	11	4898400	5538717	640318	DEL	3	2	17	0	4	1	2	4	0	0	6	NO
CNVR_2196	11	27849112	31324038	3474927	DEL	14	2	46	0	10	8	2	9	10	5	2	NO
CNVR_2329	11	49048548	49096200	47653	CNV	6	3	46	0	8	10	1	9	7	6	5	NO
CNVR_2516	11	75208189	76902690	1694502	DEL	3	3	61	1	7	13	2	6	4	10	18	NO
CNVR_3138	12	61174243	64062659	2888417	DEL	8	2	6	0	1	0	0	4	0	0	1	NO
CNVR_3240	12	70701119	76652818	5951700	DEL	104	3	129	3	24	24	2	19	12	26	19	YES
CNVR_3252	12	71394890	74775070	3380181	CNV	79	3	55	3	10	3	0	8	11	13	7	YES
CNVR_3280	12	72399731	74811010	2411280	DEL	67	3	34	1	6	2	2	7	5	6	5	YES
CNVR_3296	12	73086913	76740539	3653627	CNV	80	3	107	3	20	18	3	14	9	26	14	YES
CNVR_3298	12	73087927	75948680	2860754	CNV	66	3	96	1	17	14	3	16	10	20	15	YES
CNVR_3301	12	73109488	74828228	1718741	CNV	56	3	64	1	9	8	2	11	8	16	9	YES
CNVR_3302	12	73117192	76740539	3623348	DEL	78	2	70	3	12	11	2	10	6	17	9	YES
CNVR_3312	12	73088713	76740539	3651827	DEL	78	2	59	3	10	11	2	7	6	16	4	YES
CNVR_3322	12	73631815	76281394	2649580	CNV	60	3	51	1	6	2	2	12	8	15	5	YES
CNVR_3331	12	73874284	75215075	1340792	CNV	35	3	29	1	5	0	0	5	8	10	0	YES
CNVR_3332	12	73950874	74050050	99177	CNV	10	3	24	1	1	2	2	4	3	9	2	YES
CNVR_3354	12	74520398	76125380	1604983	DEL	17	2	8	0	1	0	0	4	2	1	0	YES
CNVR_3396	12	75788614	76661521	872908	DEL	15	3	121	1	24	18	1	17	9	30	21	YES
CNVR_3407	12	76178649	76539170	360522	CNV	3	2	13	0	5	0	0	3	3	0	2	YES
CNVR_3425	12	76440039	76562006	121968	DEL	3	3	24	0	4	5	1	1	5	2	6	YES
CNVR_3532	13	1262	886796	885535	CNV	12	3	62	1	7	5	1	14	7	21	6	NO
CNVR_3633	13	10812199	11297453	485255	CNV	19	3	94	1	15	15	3	11	13	26	10	YES
CNVR_3635	13	10960139	17846162	6886024	DEL	41	2	58	1	8	0	0	13	11	22	3	NO
CNVR_3645	13	11190158	11297461	107304	CNV	7	3	34	2	3	0	0	5	8	15	1	NO
CNVR_3824	13	43742415	46499958	2757544	DEL	7	2	88	0	17	24	3	9	1	12	22	NO
CNVR_4054	14	2350	480132	477783	CNV	37	3	52	2	10	4	0	11	5	10	10	YES
CNVR_4055	14	19133	302441	283309	DEL	22	2	28	0	4	6	1	4	1	7	5	YES
CNVR_4058	14	22954	1365304	1342351	CNV	87	3	59	3	8	3	0	10	6	25	4	YES
CNVR_4059	14	36192	384798	348607	CNV	24	2	53	3	10	5	1	8	6	15	5	YES
CNVR_4061	14	58523	1003680	945158	CNV	83	3	135	3	28	16	3	18	14	36	17	YES
CNVR_4062	14	76592	1003680	927089	CNV	82	3	162	3	28	19	3	26	18	46	19	YES
CNVR_4076	14	266465	454000	187536	DEL	13	3	84	0	22	24	3	7	0	7	21	YES
CNVR_4077	14	240537	1125790	885254	CNV	66	3	55	1	4	3	1	7	9	25	5	YES
CNVR_4083	14	374660	734706	360047	CNV	41	2	18	0	9	0	0	2	3	4	0	YES
CNVR_4088	14	470417	660748	190332	CNV	26	3	178	3	27	25	3	30	19	47	24	YES
CNVR_4105	14	569501	635352	65852	CNV	9	3	88	1	21	23	3	9	0	10	21	NO
CNVR_4120	14	847251	1349565	502315	DEL	10	3	100	3	12	1	0	18	22	42	2	NO
CNVR_4805	15	6048067	6117560	69494	CNV	5	2	13	0	3	0	0	4	2	4	0	NO
CNVR_5079	15	46837953	46991837	153885	DEL	8	2	34	0	6	11	0	4	2	4	7	YES
CNVR_5131	15	49557944	49703488	145545	CNV	6	3	40	0	5	7	1	11	4	8	4	NO
CNVR_5150	15	50687501	50779723	92223	CNV	6	3	40	1	3	2	0	6	7	19	2	YES
CNVR_5250	15	64951467	65016783	65317	DEL	5	2	81	0	17	20	2	10	2	9	21	NO
CNVR_5383	15	80418723	80947245	528523	CNV	6	4	87	1	13	13	3	10	3	25	19	YES
CNVR_5514	16	5559248	5644678	85431	DEL	4	2	37	0	9	6	1	4	1	4	12	YES
CNVR_6173	17	14214211	14236934	22724	CNV	5	3	52	2	6	1	0	10	6	27	0	YES
CNVR_6224	17	21231008	24003035	2772028	DEL	5	2	24	0	6	1	0	4	0	1	12	NO
CNVR_6496	17	50580306	51718233	1137928	CNV	34	3	91	3	9	0	0	23	16	39	1	YES
CNVR_6497	17	50610906	50836379	225474	CNV	9	3	30	2	4	0	1	9	8	4	2	YES
CNVR_6512	17	51605251	51667750	62500	CNV	5	4	38	1	1	0	0	14	4	18	0	YES
CNVR_6730	18	15506516	21364612	5858097	DEL	23	2	22	0	2	3	0	8	0	7	2	NO
CNVR_7034	18	59684042	59983585	299544	DEL	5	2	97	2	15	9	2	17	12	30	10	NO
CNVR_7502	19	50897682	50940635	42954	CNV	8	2	9	0	1	2	0	3	1	0	2	YES
CNVR_7619	2	5706778	7047584	1340807	DEL	14	2	13	0	0	1	3	5	1	3	0	NO
CNVR_8818	20	46270033	52092102	5822070	DEL	14	2	7	0	1	0	0	3	0	3	0	NO
CNVR_9111	21	1354014	1968202	614189	DEL	11	2	50	1	5	3	0	16	6	10	9	NO
CNVR_9230	21	20069270	20676469	607200	CNV	8	3	19	0	2	0	0	7	2	7	1	NO
CNVR_9625	22	5856609	7696206	1839598	DEL	4	2	24	0	3	3	1	4	4	8	1	NO
CNVR_9839	22	44987343	45075007	87665	DEL	7	2	69	0	15	19	3	6	2	6	18	NO
CNVR_10026	23	17866625	21861674	3995050	CNV	17	3	31	0	4	6	2	6	1	4	8	NO
CNVR_10131	23	25803761	26049083	245323	CNV	10	3	18	1	1	1	0	4	4	7	0	YES
CNVR_10203	23	27688326	27879750	191425	DEL	5	3	54	0	10	9	1	8	8	15	3	NO
CNVR_10360	23	34423339	34652686	229348	DEL	12	3	20	0	5	4	0	5	0	3	3	YES
CNVR_10361	23	34436959	34736874	299916	DEL	18	2	39	0	6	10	1	11	0	6	5	YES
CNVR_11193	26	3962702	4699757	737056	DEL	3	2	23	0	3	8	2	3	2	3	2	NO
CNVR_11596	27	5255497	5953680	698184	CNV	26	3	44	1	2	5	1	9	9	14	3	YES
CNVR_11597	27	5279835	6464573	1184739	DEL	38	3	52	1	6	7	2	13	6	6	11	YES
CNVR_11676	27	10742343	15979016	5236674	DEL	19	2	18	0	1	2	1	5	1	1	7	NO
CNVR_11898	27	39609951	43049305	3439355	DEL	19	2	31	0	7	16	1	6	0	0	1	NO
CNVR_11905	27	39956648	41056271	1099624	DEL	8	3	13	0	3	5	0	4	0	0	1	NO
CNVR_11971	28	2275709	4192646	1916938	DEL	11	2	57	0	7	15	3	6	2	8	16	NO
CNVR_11974	28	2368259	2430666	62408	CNV	3	3	72	3	14	0	0	16	9	29	1	NO
CNVR_11975	28	2375773	2443746	67974	CNV	3	3	33	1	10	0	0	9	5	8	0	NO
CNVR_11976	28	2393043	2458656	65614	DEL	3	3	46	0	5	7	0	10	6	12	6	NO
CNVR_12305	29	2385708	5713726	3328019	DEL	29	2	72	0	8	10	1	15	6	21	11	NO
CNVR_12345	29	5332971	5455944	122974	CNV	10	3	21	0	2	0	1	6	3	5	4	YES
CNVR_12351	29	5461160	5750727	289568	DEL	8	3	21	1	4	0	0	3	5	8	0	YES
CNVR_12358	29	5510226	5641597	131372	CNV	6	3	89	2	14	6	1	17	15	23	11	YES
CNVR_12363	29	5572158	5588775	16618	DEL	4	3	47	0	9	3	0	8	8	14	5	NO
CNVR_12769	29	38431845	39014499	582655	DEL	10	2	19	0	3	3	0	4	3	2	4	NO
CNVR_12790	29	39279769	39644537	364769	DEL	17	2	51	0	9	12	2	7	2	8	11	YES
CNVR_12798	29	39592813	39812107	219295	DEL	8	3	52	1	8	5	1	11	6	11	9	NO
CNVR_12945	3	5779846	7464429	1684584	DEL	9	2	36	0	10	11	3	4	0	0	8	NO
CNVR_12982	3	8680534	8724599	44066	CNV	11	3	40	0	5	6	3	11	3	6	6	NO
CNVR_12983	3	8690025	8701128	11104	CNV	8	3	57	0	7	17	2	8	1	13	9	NO
CNVR_13039	3	12554467	12593183	38717	DEL	6	2	24	0	4	5	0	3	0	7	5	NO
CNVR_13195	3	36722681	39154078	2431398	DEL	5	3	27	0	3	2	0	4	5	10	3	NO
CNVR_13246	3	41237073	48958884	7721812	DEL	22	2	48	0	6	17	1	8	0	9	7	NO
CNVR_13338	3	54340640	54684590	343951	DEL	10	3	60	2	10	9	2	14	6	9	8	YES
CNVR_13552	3	88122610	90088023	1965414	DEL	5	2	38	0	9	12	0	6	1	0	10	NO
CNVR_13877	4	12871015	18058404	5187390	DEL	16	2	70	0	14	19	3	8	1	8	17	NO
CNVR_14491	4	106427011	106444684	17674	CNV	5	3	21	0	2	0	0	8	4	7	0	NO
CNVR_14495	4	106465749	106541605	75857	DEL	4	3	24	1	4	5	1	4	1	3	5	YES
CNVR_14510	4	106638501	106801410	162910	CNV	13	2	22	0	4	1	0	4	1	11	1	YES
CNVR_14512	4	106654103	106791666	137564	CNV	12	3	39	0	5	2	0	7	4	20	1	YES
CNVR_14608	4	113883476	114000781	117306	CNV	7	2	19	0	3	7	0	3	0	1	5	YES
CNVR_15028	5	44417380	44544860	127481	CNV	18	3	51	2	4	0	0	11	9	25	0	YES
CNVR_15029	5	44417440	44448436	30997	CNV	6	3	45	1	13	6	1	6	4	13	1	YES
CNVR_15030	5	44426165	44461728	35564	CNV	12	2	36	0	6	16	0	3	0	1	10	YES
CNVR_15140	5	59369160	59647775	278616	DEL	13	3	13	0	1	4	0	4	0	2	2	YES
CNVR_15420	5	99574596	99701741	127146	DEL	9	4	16	0	2	1	1	1	5	6	0	YES
CNVR_15464	5	102462690	102667951	205262	CNV	7	3	68	1	11	5	0	13	6	24	8	YES
CNVR_15620	6	436440	1090676	654237	DEL	15	3	13	0	1	1	1	6	1	3	0	NO
CNVR_15672	6	5303751	6613000	1309250	CNV	12	4	190	3	34	25	2	28	23	50	25	NO
CNVR_15678	6	5563747	6025885	462139	CNV	5	3	105	1	19	24	2	10	4	22	23	NO
CNVR_16582	7	1493994	2839699	1345706	DEL	6	3	77	0	10	15	1	7	11	19	14	NO
CNVR_16674	7	10522794	11532806	1010013	DEL	15	3	67	0	10	10	0	6	9	26	6	YES
CNVR_16698	7	11631784	11837806	206023	CNV	11	3	12	1	2	0	0	2	3	3	1	YES
CNVR_16700	7	11657884	12053344	395461	CNV	24	3	65	1	5	3	0	11	11	27	7	YES
CNVR_16706	7	11794586	11955344	160759	CNV	11	3	36	1	2	3	0	6	6	10	8	YES
CNVR_17897	8	60490658	60528327	37670	DEL	4	3	25	0	7	8	0	4	0	0	6	YES
CNVR_17972	8	70871260	71194415	323156	CNV	13	3	80	2	4	3	0	20	7	36	8	YES
CNVR_17974	8	70919001	71194415	275415	CNV	12	3	76	3	7	0	0	18	9	38	1	YES
CNVR_17980	8	71011524	71045108	33585	DEL	5	2	4	0	0	0	0	3	0	1	0	YES
CNVR_17982	8	71019251	71211113	191863	CNV	5	3	27	3	5	4	0	6	4	1	4	YES
CNVR_18730	9	57310480	59553289	2242810	DEL	5	2	8	0	0	0	0	6	1	1	0	NO
DEL: Deletion, DUP: Duplication, CNV: Copy Number Variation, BAQ: Blonde d'Aquitaine, BWS: Brown Swiss, CHA: Charolaise, HOL: Holstein, MON: Montbéliarde, NOR: Normande, RdP: Rouge des Près
