# Supplementary material for: Identification of copy number variation in French dairy and beef breeds using next-generation sequencing
Source: Genet Sel Evol. 2017 Oct 24;49:77. doi: 10.1186/s12711-017-0352-z (PMC5655909; doi:10.1186/s12711-017-0352-z)
Supplement: Supplementary file 9 — Additional file 9: Table S8. Summary of validated variants by the different approaches. This is an inventory of validated variants using the two in silico and/or array-based CGH approaches. This dataset was the final subset of variants retained in this study. Information about breeds and validation approaches that support each variant is indicated. [file 12711_2017_352_MOESM9_ESM.xlsx]

## Sheet: Table S8
Additional File 9 Table S8 Summary of validated variants by the different approaches
CNVR_ID	BTA	CNVR_start	CNVR_end	CNVR_size	CNVR_type	# tools	# total animals	# BAQ animals	# BWS animals	# CHA animals	# HOL animals	# LIM animals	# MON animals	# NOR animals	# RdP animals	Twice_sequenced_validation	Mendelian_Transmission	CGH_validation	LD_validation
CNVR_2	1	32072	33093	1022	DEL	2	118	21	0	24	26	21	16	7	3	YES	YES	NO	NO
CNVR_5	1	518550	519270	721	DEL	2	19	5	0	5	2	2	5	0	0	YES	YES	NO	NO
CNVR_10	1	1902150	1903757	1608	DEL	4	132	24	1	24	26	21	18	15	3	YES	YES	NO	NO
CNVR_13	1	2979049	2980332	1284	DEL	3	9	1	0	1	2	0	4	1	0	YES	YES	NO	NO
CNVR_15	1	3066743	3277533	210791	DEL	3	10	1	1	3	0	1	3	0	1	YES	YES	NO	NO
CNVR_21	1	4179501	4181413	1913	DEL	4	33	7	0	7	0	8	9	2	0	YES	YES	NO	NO
CNVR_23	1	4204548	4248105	43558	DEL	3	9	3	0	1	2	1	2	0	0	YES	YES	NO	NO
CNVR_26	1	4543929	4554480	10552	DEL	2	18	0	0	0	5	3	6	4	0	YES	YES	NO	NO
CNVR_27	1	4543946	4566957	23012	CNV	3	32	0	0	0	9	6	11	6	0	YES	YES	NO	NO
CNVR_28	1	4547730	4558573	10844	DEL	3	34	0	1	0	16	6	6	5	0	YES	YES	NO	NO
CNVR_29	1	4552349	4562613	10265	DEL	3	10	0	0	0	3	2	3	2	0	YES	YES	NO	NO
CNVR_31	1	4681748	4713032	31285	DEL	2	25	5	0	4	6	4	4	1	1	YES	YES	NO	NO
CNVR_34	1	5081065	5085500	4436	DEL	3	17	1	0	6	2	2	4	1	1	YES	YES	NO	NO
CNVR_49	1	6608857	6609818	962	DEL	2	62	13	0	16	8	16	5	2	2	YES	YES	NO	NO
CNVR_51	1	6733745	6734918	1174	DEL	3	93	23	0	21	12	19	12	3	3	YES	YES	NO	NO
CNVR_64	1	9462950	9464476	1527	DEL	3	35	5	0	3	3	10	7	6	1	YES	YES	NO	NO
CNVR_68	1	10546001	10549000	3000	DEL	4	3	0	0	0	1	0	2	0	0	YES	YES	NO	NO
CNVR_71	1	10842378	10843518	1141	DEL	3	132	24	0	23	30	23	17	12	3	YES	YES	NO	NO
CNVR_83	1	12246830	12247229	400	DEL	3	19	2	1	1	4	6	4	1	0	YES	YES	NO	NO
CNVR_85	1	12389001	12393025	4025	DEL	3	64	19	0	5	23	10	5	1	1	YES	YES	NO	NO
CNVR_87	1	12500922	12507000	6079	DEL	3	76	16	0	20	14	11	7	5	3	YES	YES	NO	NO
CNVR_88	1	12602032	12665363	63332	DEL	2	17	6	0	4	0	1	5	0	1	YES	YES	NO	NO
CNVR_95	1	13149303	13150112	810	DEL	2	59	16	0	19	3	10	8	1	2	YES	YES	NO	NO
CNVR_96	1	13152751	13155750	3000	DEL	4	27	2	0	3	11	0	4	5	2	YES	YES	NO	NO
CNVR_104	1	13687643	13694620	6978	DEL	3	81	20	0	23	8	17	10	0	3	YES	YES	NO	NO
CNVR_105	1	13779051	13779446	396	DEL	2	17	0	0	1	5	1	4	5	1	YES	YES	NO	NO
CNVR_108	1	13831046	13832250	1205	DEL	3	26	3	0	3	11	6	2	1	0	YES	YES	NO	NO
CNVR_109	1	13914601	13922750	8150	DEL	3	4	1	0	1	0	0	2	0	0	YES	YES	NO	NO
CNVR_113	1	14086649	14087128	480	DEL	3	35	5	0	5	8	3	7	4	3	YES	YES	NO	NO
CNVR_116	1	14216595	14218028	1434	DEL	4	86	22	0	18	6	18	13	6	3	YES	YES	NO	NO
CNVR_117	1	14323887	14325425	1539	DEL	3	78	16	0	21	10	16	11	1	3	YES	YES	NO	NO
CNVR_118	1	14405942	14406353	412	DEL	2	23	3	0	3	6	3	5	2	1	YES	YES	NO	NO
CNVR_124	1	14963550	14967038	3489	DEL	3	35	2	0	11	6	9	5	0	2	YES	YES	NO	NO
CNVR_125	1	14964916	14980786	15871	DEL	2	40	3	0	15	3	9	6	1	3	YES	YES	NO	NO
CNVR_126	1	14974908	14975718	811	DEL	3	65	3	0	20	12	10	12	5	3	YES	YES	NO	NO
CNVR_129	1	15585716	15591000	5285	DEL	4	26	4	0	8	3	4	4	1	2	YES	YES	NO	NO
CNVR_135	1	16138608	16139602	995	DEL	3	74	22	0	18	5	17	7	2	3	YES	YES	NO	NO
CNVR_138	1	16945429	16946234	806	DEL	3	114	22	0	20	24	23	15	9	1	YES	YES	NO	NO
CNVR_145	1	17775335	17776040	706	DEL	3	38	12	0	6	6	9	4	1	0	YES	YES	NO	NO
CNVR_149	1	17965477	17966232	756	DEL	3	31	11	0	4	8	4	3	0	1	YES	YES	NO	NO
CNVR_172	1	20707573	20708215	643	DEL	3	21	6	0	4	2	5	4	0	0	YES	YES	NO	NO
CNVR_175	1	20855475	20857038	1564	DEL	3	86	20	1	18	14	14	13	3	3	YES	YES	NO	NO
CNVR_186	1	22416856	22418574	1719	DEL	4	61	21	0	13	4	14	4	2	3	YES	YES	NO	NO
CNVR_189	1	22609119	22613552	4434	DEL	3	42	7	1	8	4	8	11	1	2	YES	YES	NO	NO
CNVR_199	1	24079270	24080624	1355	DEL	4	23	2	0	4	8	0	8	1	0	YES	YES	NO	NO
CNVR_203	1	25077751	25082000	4250	DEL	3	102	19	0	13	33	22	6	7	2	YES	YES	NO	NO
CNVR_216	1	26488372	26488954	583	DEL	3	57	1	2	0	18	6	16	14	0	YES	YES	NO	NO
CNVR_220	1	26665041	26672293	7253	DEL	3	17	3	0	5	3	3	1	2	0	YES	YES	NO	NO
CNVR_222	1	27294218	27295778	1561	DEL	4	77	18	1	14	11	17	11	4	1	YES	YES	NO	NO
CNVR_227	1	27559448	27560363	916	DEL	3	114	20	0	21	23	21	19	8	2	YES	YES	NO	NO
CNVR_228	1	27608501	27609274	774	DEL	4	5	0	0	1	0	0	4	0	0	YES	YES	NO	NO
CNVR_234	1	28141708	28143600	1893	DEL	3	48	6	0	15	6	13	7	0	1	YES	YES	NO	NO
CNVR_236	1	28303978	28304618	641	DEL	3	70	14	0	12	10	18	7	6	3	YES	YES	NO	NO
CNVR_250	1	29948306	29949347	1042	DEL	4	86	18	1	18	11	17	10	8	3	YES	YES	NO	NO
CNVR_274	1	32655258	32655627	370	DEL	3	7	0	0	0	0	0	4	2	1	YES	YES	NO	NO
CNVR_285	1	33707751	33710000	2250	DEL	3	28	4	0	5	3	13	0	3	0	YES	YES	NO	NO
CNVR_286	1	33723001	33725205	2205	DEL	3	28	4	0	6	3	11	0	4	0	YES	YES	NO	NO
CNVR_287	1	33755736	33756899	1164	DEL	3	35	8	0	12	2	7	3	1	2	YES	YES	NO	NO
CNVR_291	1	33998001	34003500	5500	DEL	4	65	12	0	10	16	11	9	5	2	YES	YES	NO	NO
CNVR_299	1	34534377	34534988	612	DEL	3	49	9	0	9	7	13	6	4	1	YES	YES	NO	NO
CNVR_301	1	34611719	34612713	995	DEL	4	62	17	1	8	12	9	12	1	2	YES	YES	NO	NO
CNVR_304	1	35117251	35123650	6400	DEL	3	38	1	0	11	3	4	13	4	2	YES	YES	NO	NO
CNVR_311	1	35688225	35716363	28139	DEL	2	58	11	0	12	6	12	11	3	3	YES	YES	NO	NO
CNVR_313	1	35863476	35864309	834	DEL	3	114	23	1	22	23	22	12	8	3	YES	YES	NO	NO
CNVR_319	1	36348327	36350500	2174	DEL	3	12	1	0	0	0	2	7	1	1	YES	YES	NO	NO
CNVR_324	1	36884489	36885227	739	DEL	3	99	9	1	17	25	19	14	11	3	YES	YES	NO	NO
CNVR_328	1	36927846	36929522	1677	DEL	3	129	15	1	18	34	20	22	16	3	YES	YES	NO	NO
CNVR_329	1	37049799	37051240	1442	DEL	3	30	9	0	0	1	8	11	0	1	YES	YES	NO	NO
CNVR_336	1	38480701	38482141	1441	DEL	4	97	22	0	21	19	16	6	10	3	YES	YES	NO	NO
CNVR_339	1	39153897	39154875	979	DEL	3	128	24	0	24	30	20	17	10	3	YES	YES	NO	NO
CNVR_340	1	39466146	39467127	982	DEL	2	49	3	2	4	16	6	9	8	1	YES	YES	NO	NO
CNVR_355	1	41246347	41247870	1524	DEL	4	55	13	0	17	4	17	2	1	1	YES	YES	NO	NO
CNVR_358	1	41836294	41836942	649	DEL	3	43	9	0	6	10	6	9	3	0	YES	YES	NO	NO
CNVR_372	1	43345623	43349436	3814	DEL	3	16	0	0	7	1	3	4	0	1	YES	YES	NO	NO
CNVR_376	1	44178382	44179719	1338	DEL	2	54	10	0	18	6	8	7	2	3	YES	YES	NO	NO
CNVR_381	1	44906942	44907898	957	DEL	2	13	3	0	1	0	1	4	4	0	YES	YES	NO	NO
CNVR_382	1	44971123	44972636	1514	DEL	3	6	1	0	1	0	0	4	0	0	YES	YES	NO	NO
CNVR_392	1	46661513	46662704	1192	DEL	3	27	7	0	3	2	8	5	2	0	YES	YES	NO	NO
CNVR_394	1	46931888	46932528	641	DEL	4	15	2	0	5	2	1	5	0	0	YES	YES	NO	NO
CNVR_395	1	47069463	47070458	996	DEL	3	12	1	0	3	3	0	5	0	0	YES	YES	NO	NO
CNVR_399	1	47195003	47195843	841	DEL	4	70	14	1	16	7	7	16	7	2	YES	YES	NO	NO
CNVR_408	1	48017714	48019140	1427	DEL	3	96	20	0	21	26	14	8	4	3	YES	YES	NO	NO
CNVR_409	1	48025571	48026552	982	DEL	4	88	18	0	18	22	14	8	5	3	YES	YES	NO	NO
CNVR_411	1	48079751	48082300	2550	DEL	4	26	5	0	7	0	3	8	3	0	YES	YES	NO	NO
CNVR_413	1	48153751	48155752	2002	DEL	4	54	7	0	20	2	7	10	7	1	YES	YES	NO	NO
CNVR_415	1	48365135	48374562	9428	DEL	3	22	6	0	8	3	2	2	0	1	YES	YES	NO	NO
CNVR_417	1	48517251	48520844	3594	DEL	3	91	22	0	20	17	17	11	1	3	YES	YES	NO	NO
CNVR_426	1	49402907	49404343	1437	DEL	3	48	13	0	13	10	5	2	2	3	YES	YES	NO	NO
CNVR_437	1	50149001	50155750	6750	DEL	3	151	24	1	25	41	22	26	9	3	YES	YES	NO	NO
CNVR_442	1	50893202	50894192	991	DEL	3	57	18	0	13	6	10	8	1	1	YES	YES	NO	NO
CNVR_444	1	51022575	51023537	963	DEL	3	49	13	0	9	13	7	5	0	2	YES	YES	NO	NO
CNVR_448	1	51426378	51427108	731	DEL	2	10	5	0	0	0	0	1	3	1	YES	YES	NO	NO
CNVR_453	1	51700751	51702400	1650	DEL	3	63	13	1	19	1	16	10	1	2	YES	YES	NO	NO
CNVR_455	1	52056897	52057869	973	DEL	3	9	2	0	1	0	0	6	0	0	YES	YES	NO	NO
CNVR_456	1	52118501	52124750	6250	DEL	4	33	2	0	9	3	9	9	1	0	YES	YES	NO	NO
CNVR_457	1	52299501	52301520	2020	DEL	3	28	5	0	8	8	2	5	0	0	YES	YES	NO	NO
CNVR_464	1	54128062	54129272	1211	DEL	4	53	8	0	12	8	7	14	3	1	YES	YES	NO	NO
CNVR_475	1	55654708	55655211	504	DEL	3	24	4	0	5	2	9	3	1	0	YES	YES	NO	NO
CNVR_477	1	55657974	55659774	1801	DEL	4	157	24	2	24	40	26	19	19	3	YES	YES	NO	NO
CNVR_481	1	55936134	55937875	1742	DEL	3	9	0	0	0	0	0	9	0	0	YES	YES	NO	NO
CNVR_489	1	56836127	56837265	1139	DEL	4	58	15	1	16	3	6	4	11	2	YES	YES	NO	NO
CNVR_491	1	57346105	57347075	971	DEL	3	74	19	0	11	17	17	7	2	1	YES	YES	NO	NO
CNVR_497	1	57946229	57947151	923	DEL	3	8	2	0	1	0	1	4	0	0	YES	YES	NO	NO
CNVR_502	1	58380271	58382543	2273	DEL	4	59	13	0	11	24	2	1	5	3	YES	YES	NO	NO
CNVR_504	1	58654801	58665900	11100	DUP	2	8	0	0	1	0	4	3	0	0	YES	YES	NO	NO
CNVR_524	1	61758751	61760045	1295	DEL	3	82	17	2	18	3	16	13	10	3	YES	YES	NO	NO
CNVR_525	1	61855146	61856621	1476	DEL	3	28	12	0	5	1	5	3	2	0	YES	YES	NO	NO
CNVR_539	1	65481850	65484600	2751	DEL	4	45	12	0	7	2	13	8	2	1	YES	YES	NO	NO
CNVR_541	1	65787778	65791250	3473	DEL	3	144	24	2	24	31	22	22	16	3	YES	YES	NO	NO
CNVR_543	1	66131229	66199874	68646	DEL	3	52	18	0	4	13	6	8	2	1	YES	YES	NO	NO
CNVR_546	1	66635718	66636923	1206	DEL	3	63	2	0	16	30	6	5	2	2	YES	YES	NO	NO
CNVR_549	1	67042372	67043081	710	DEL	3	32	8	0	6	0	10	2	5	1	YES	YES	NO	NO
CNVR_564	1	69478840	69479848	1009	DEL	3	144	24	1	25	36	22	20	13	3	YES	YES	NO	NO
CNVR_567	1	70039656	70040451	796	DEL	3	51	8	0	12	15	7	5	1	3	YES	YES	NO	NO
CNVR_573	1	70838876	70839688	813	DEL	3	110	20	1	22	24	19	15	6	3	YES	YES	NO	NO
CNVR_584	1	72250453	72251400	948	DEL	4	23	6	0	9	2	1	3	2	0	YES	YES	NO	NO
CNVR_593	1	76047001	76054028	7028	DEL	3	31	8	0	1	10	5	7	0	0	YES	YES	NO	NO
CNVR_594	1	76054716	76055653	938	DEL	3	23	8	0	1	5	4	5	0	0	YES	YES	NO	NO
CNVR_602	1	76952251	76955100	2850	DEL	4	25	3	0	7	6	1	4	3	1	YES	YES	NO	NO
CNVR_606	1	77119178	77120290	1113	DEL	3	11	2	1	4	1	0	3	0	0	YES	YES	NO	NO
CNVR_607	1	77230438	77231010	573	DEL	3	47	9	0	7	8	11	5	7	0	YES	YES	NO	NO
CNVR_622	1	78586036	78690227	104192	DEL	3	39	4	0	13	6	7	4	4	1	YES	YES	NO	NO
CNVR_623	1	78608171	78608976	806	DEL	3	35	2	0	10	5	8	6	3	1	YES	YES	NO	NO
CNVR_627	1	80238301	80241900	3600	DEL	4	63	15	0	12	13	15	6	1	1	YES	YES	NO	NO
CNVR_628	1	80701470	80702314	845	DEL	3	14	0	0	3	1	0	5	5	0	YES	YES	NO	NO
CNVR_637	1	82666001	82669808	3808	DEL	3	19	4	0	1	2	5	6	0	1	YES	YES	NO	NO
CNVR_641	1	83214601	83238900	24300	DEL	3	24	4	0	7	1	6	5	0	1	YES	YES	NO	NO
CNVR_654	1	87505527	87506290	764	DEL	3	91	20	0	23	13	18	10	5	2	YES	YES	NO	NO
CNVR_662	1	88710965	88712436	1472	DEL	3	33	1	0	1	22	9	0	0	0	YES	YES	NO	NO
CNVR_664	1	89029915	89030548	634	DEL	2	6	0	0	2	0	0	4	0	0	YES	YES	NO	NO
CNVR_667	1	89274149	89275185	1037	DEL	3	91	15	0	23	16	18	13	3	3	YES	YES	NO	NO
CNVR_670	1	89626219	89627015	797	DEL	3	25	10	0	1	0	3	4	6	1	YES	YES	NO	NO
CNVR_671	1	89990037	89991050	1014	DEL	3	89	14	0	16	15	16	14	12	2	YES	YES	NO	NO
CNVR_678	1	91281768	91284750	2983	DEL	4	23	4	0	11	1	1	4	0	2	YES	YES	NO	NO
CNVR_679	1	91345751	91398750	53000	DEL	4	9	0	0	3	0	0	5	0	1	YES	YES	NO	NO
CNVR_681	1	91513538	91525750	12213	DEL	3	65	16	0	12	6	16	10	2	3	YES	YES	NO	NO
CNVR_684	1	91665560	91666293	734	DEL	3	104	17	0	20	25	20	12	7	3	YES	YES	NO	NO
CNVR_689	1	92175901	92178750	2850	DEL	4	25	5	0	6	4	2	6	1	1	YES	YES	NO	NO
CNVR_694	1	92852281	92853075	795	DEL	3	133	22	0	25	31	21	20	11	3	YES	YES	NO	NO
CNVR_696	1	93006501	93023750	17250	DEL	3	71	3	3	2	33	3	14	13	0	YES	YES	NO	NO
CNVR_716	1	95272836	95273484	649	DEL	3	80	17	0	15	13	17	7	10	1	YES	YES	NO	NO
CNVR_721	1	95676483	95677263	781	DEL	3	25	9	0	2	5	2	4	3	0	YES	YES	NO	NO
CNVR_722	1	96354183	96355064	882	DEL	4	26	10	0	11	0	2	3	0	0	YES	YES	NO	NO
CNVR_724	1	96641501	96644065	2565	DEL	4	75	15	0	7	29	6	15	1	2	YES	YES	NO	NO
CNVR_725	1	97279133	97282200	3068	DEL	4	107	21	1	23	25	13	15	6	3	YES	YES	NO	NO
CNVR_726	1	97518501	97546000	27500	DEL	3	75	19	0	23	7	13	9	1	3	YES	YES	NO	NO
CNVR_729	1	99571874	99572579	706	DEL	3	115	17	1	20	25	20	17	12	3	YES	YES	NO	NO
CNVR_730	1	99571967	99572579	613	DEL	3	98	13	1	15	23	20	15	8	3	YES	YES	NO	NO
CNVR_737	1	101021876	101023507	1632	DEL	3	75	12	1	18	17	17	7	1	2	YES	YES	NO	NO
CNVR_738	1	101135649	101136528	880	DEL	4	20	4	0	8	1	3	3	0	1	YES	YES	NO	NO
CNVR_739	1	101144838	101145900	1063	DEL	4	58	17	0	15	4	17	3	1	1	YES	YES	NO	NO
CNVR_741	1	101333990	101335761	1772	DEL	2	48	11	0	17	2	9	5	1	3	YES	YES	NO	NO
CNVR_745	1	101931833	101932750	918	DEL	3	96	16	0	22	27	13	12	4	2	YES	YES	NO	NO
CNVR_746	1	101939811	101941509	1699	DEL	3	129	25	0	24	30	25	16	6	3	YES	YES	NO	NO
CNVR_748	1	102030813	102032530	1718	DEL	4	117	24	0	25	28	17	11	9	3	YES	YES	NO	NO
CNVR_750	1	102563501	102565859	2359	DEL	4	12	0	0	4	3	0	4	1	0	YES	YES	NO	NO
CNVR_756	1	103110347	103112588	2242	DEL	3	80	5	2	19	18	15	10	9	2	YES	YES	NO	NO
CNVR_764	1	103576480	103578900	2421	DEL	4	95	11	1	22	21	17	12	8	3	YES	YES	NO	NO
CNVR_765	1	103584919	103588469	3551	DEL	4	112	12	0	22	33	17	13	12	3	YES	YES	NO	NO
CNVR_772	1	104001616	104002971	1356	DEL	3	84	19	0	14	17	15	16	1	2	YES	YES	NO	NO
CNVR_774	1	104108622	104111118	2497	DEL	3	25	8	0	2	0	9	4	0	2	YES	YES	NO	NO
CNVR_775	1	104198401	104201000	2600	DEL	3	28	10	0	7	0	6	3	0	2	YES	YES	NO	NO
CNVR_777	1	104478172	104479298	1127	DEL	3	6	2	0	0	0	0	4	0	0	YES	YES	NO	NO
CNVR_778	1	104478855	104494015	15161	DEL	3	18	2	0	10	0	0	4	0	2	YES	YES	NO	NO
CNVR_782	1	104915310	104916181	872	DEL	3	64	12	0	10	16	12	9	3	2	YES	YES	NO	NO
CNVR_783	1	104945249	104946701	1453	DEL	4	77	14	0	20	14	15	8	4	2	YES	YES	NO	NO
CNVR_784	1	105081900	105082671	772	DEL	2	21	4	0	5	5	2	4	1	0	YES	YES	NO	NO
CNVR_788	1	105542751	105574250	31500	DEL	4	13	2	0	0	0	0	11	0	0	YES	YES	NO	NO
CNVR_791	1	105890312	105892494	2183	DEL	3	22	4	0	9	0	3	4	1	1	YES	YES	NO	NO
CNVR_793	1	105995170	105996989	1820	DEL	4	26	4	0	8	1	7	4	0	2	YES	YES	NO	NO
CNVR_795	1	107320192	107320801	610	DEL	2	27	6	0	4	5	4	7	1	0	YES	YES	NO	NO
CNVR_799	1	107460858	107462135	1278	DEL	2	84	23	0	23	7	18	7	3	3	YES	YES	NO	NO
CNVR_800	1	107529392	107530344	953	DEL	4	143	25	1	25	33	23	23	10	3	YES	YES	NO	NO
CNVR_804	1	107968929	107970230	1302	DEL	3	54	11	0	16	5	9	8	4	1	YES	YES	NO	NO
CNVR_820	1	110746751	110752800	6050	DUP	3	23	8	0	3	1	6	5	0	0	YES	YES	NO	NO
CNVR_833	1	111666407	111666957	551	DEL	2	27	3	1	3	5	6	6	2	1	YES	YES	NO	NO
CNVR_843	1	113216701	113248500	31800	DUP	2	69	12	2	20	6	11	14	2	2	YES	YES	NO	NO
CNVR_846	1	113636319	113638173	1855	DEL	2	16	3	0	4	0	3	4	0	2	YES	YES	NO	NO
CNVR_853	1	115097130	115098195	1066	DEL	3	49	15	0	18	2	8	5	0	1	YES	YES	NO	NO
CNVR_854	1	115101501	115103812	2312	DEL	3	60	10	0	20	12	7	6	4	1	YES	YES	NO	NO
CNVR_855	1	115156201	115161500	5300	DEL	3	8	4	0	0	0	1	2	0	1	YES	YES	NO	NO
CNVR_858	1	115251057	115252500	1444	DEL	3	20	8	0	1	3	2	6	0	0	YES	YES	NO	NO
CNVR_877	1	120110567	120111373	807	DEL	3	49	19	0	8	6	10	1	2	3	YES	YES	NO	NO
CNVR_884	1	121379748	121381017	1270	DEL	3	61	18	1	10	10	17	2	1	2	YES	YES	NO	NO
CNVR_887	1	122272760	122273585	826	DEL	3	14	4	0	5	0	1	3	1	0	YES	YES	NO	NO
CNVR_888	1	122742501	122750500	8000	DEL	4	59	5	1	9	15	6	11	11	1	YES	YES	NO	NO
CNVR_891	1	122903728	122904658	931	DEL	4	67	16	0	12	10	16	8	4	1	YES	YES	NO	NO
CNVR_893	1	123009245	123013358	4114	DEL	3	63	16	1	16	6	15	3	3	3	YES	YES	NO	NO
CNVR_894	1	123069751	123079352	9602	DEL	4	72	18	1	12	15	14	7	3	2	YES	YES	NO	NO
CNVR_899	1	123649034	123649952	919	DEL	3	45	14	0	6	8	8	4	3	2	YES	YES	NO	NO
CNVR_902	1	124137628	124140803	3176	DEL	3	135	24	0	25	35	22	19	7	3	YES	YES	NO	NO
CNVR_903	1	124141751	124151675	9925	DEL	4	150	23	1	25	41	22	22	13	3	YES	YES	NO	NO
CNVR_918	1	126342185	126343100	916	DEL	3	27	9	1	5	3	4	3	1	1	YES	YES	NO	NO
CNVR_930	1	129156277	129157905	1629	DEL	3	52	12	0	7	11	11	5	3	3	YES	YES	NO	NO
CNVR_932	1	129333708	129334729	1022	DEL	3	60	23	0	8	3	14	8	3	1	YES	YES	NO	NO
CNVR_942	1	131101265	131102396	1132	DEL	3	41	6	0	13	9	5	5	2	1	YES	YES	NO	NO
CNVR_945	1	131790161	131792500	2340	DEL	4	13	5	0	0	0	5	3	0	0	YES	YES	NO	NO
CNVR_972	1	137614685	137618500	3816	DEL	3	76	11	0	11	27	15	8	3	1	YES	YES	NO	NO
CNVR_977	1	138165301	138167500	2200	DEL	4	72	11	0	16	11	18	13	3	0	YES	YES	NO	NO
CNVR_986	1	138619535	138620324	790	DEL	2	16	4	0	3	3	3	3	0	0	YES	YES	NO	NO
CNVR_996	1	139389190	139392600	3411	DEL	4	22	16	0	1	0	2	3	0	0	YES	YES	NO	NO
CNVR_1000	1	140012681	140013519	839	DEL	3	34	14	0	4	5	6	3	2	0	YES	YES	NO	NO
CNVR_1001	1	140112941	140113627	687	DEL	4	13	6	0	4	0	0	3	0	0	YES	YES	NO	NO
CNVR_1004	1	140377946	140378790	845	DEL	3	30	6	0	9	1	0	10	4	0	YES	YES	NO	NO
CNVR_1009	1	141416451	141417361	911	DEL	2	36	11	0	4	1	13	4	0	3	YES	YES	NO	NO
CNVR_1015	1	142203601	142204220	620	DEL	2	3	0	0	0	0	0	3	0	0	YES	YES	NO	NO
CNVR_1016	1	142332755	142339377	6623	DEL	3	67	20	0	23	3	6	8	4	3	YES	YES	NO	NO
CNVR_1024	1	142365064	142367850	2787	DEL	3	9	0	0	1	0	0	7	0	1	YES	YES	NO	NO
CNVR_1025	1	142439401	142440600	1200	DEL	3	44	3	0	9	13	1	13	5	0	YES	YES	NO	NO
CNVR_1027	1	142496085	142533024	36940	DEL	2	50	13	0	15	2	11	6	0	3	YES	YES	NO	NO
CNVR_1038	1	143766259	143773568	7310	DEL	2	38	8	0	6	7	8	6	0	3	YES	YES	NO	NO
CNVR_1047	1	145293251	145452900	159650	CNV	3	98	17	0	18	14	28	14	5	2	YES	YES	NO	NO
CNVR_1048	1	145293251	145428061	134811	CNV	3	109	18	0	15	23	24	17	10	2	YES	YES	NO	NO
CNVR_1049	1	145293251	145452900	159650	CNV	3	113	20	0	22	17	33	14	5	2	YES	YES	NO	NO
CNVR_1050	1	145293251	145406308	113058	CNV	3	137	17	0	19	33	31	20	15	2	YES	YES	NO	NO
CNVR_1051	1	145293929	145396471	102543	CNV	3	102	11	0	14	23	26	15	11	2	YES	YES	NO	NO
CNVR_1053	1	145294231	145356279	62049	DEL	3	58	13	0	17	8	12	5	2	1	YES	YES	NO	NO
CNVR_1055	1	145293251	145452900	159650	CNV	3	113	20	0	22	17	33	14	5	2	YES	YES	NO	NO
CNVR_1058	1	145293251	145452900	159650	CNV	3	110	19	0	21	17	33	14	5	1	YES	YES	NO	NO
CNVR_1059	1	145299390	145371487	72098	DEL	3	65	1	2	1	26	11	9	14	1	YES	YES	NO	NO
CNVR_1060	1	145299622	145308669	9048	DEL	3	45	0	0	0	15	8	12	10	0	YES	YES	NO	NO
CNVR_1061	1	145293251	145452900	159650	CNV	3	109	20	0	21	16	33	13	5	1	YES	YES	NO	NO
CNVR_1062	1	145293251	145452600	159350	CNV	3	100	18	0	18	15	30	13	5	1	YES	YES	NO	NO
CNVR_1065	1	145300465	145349980	49516	DEL	3	47	9	0	12	8	9	7	1	1	YES	YES	NO	NO
CNVR_1066	1	145295375	145403500	108126	CNV	3	154	21	0	19	39	30	24	19	2	YES	YES	NO	NO
CNVR_1067	1	145293251	145452600	159350	CNV	2	74	11	0	12	11	25	9	5	1	YES	YES	NO	NO
CNVR_1069	1	145293251	145452900	159650	CNV	2	79	12	0	12	11	29	9	5	1	YES	YES	NO	NO
CNVR_1070	1	145293251	145452900	159650	CNV	2	96	19	0	15	14	31	10	5	2	YES	YES	NO	NO
CNVR_1072	1	145293301	145452900	159600	CNV	2	71	10	0	12	12	22	9	5	1	YES	YES	NO	NO
CNVR_1073	1	145295375	145403500	108126	CNV	3	153	21	0	19	38	30	24	19	2	YES	YES	NO	NO
CNVR_1074	1	145293301	145452600	159300	CNV	2	58	9	0	6	11	19	9	3	1	YES	YES	NO	NO
CNVR_1075	1	145293301	145452900	159600	CNV	2	84	15	0	14	15	24	10	3	3	YES	YES	NO	NO
CNVR_1078	1	145310735	145356301	45567	DEL	2	20	0	0	0	6	5	4	5	0	YES	YES	NO	NO
CNVR_1080	1	145303099	145410494	107396	CNV	3	176	20	3	19	51	31	30	20	2	YES	YES	NO	NO
CNVR_1081	1	145300491	145424674	124184	CNV	3	160	17	3	15	46	29	30	18	2	YES	YES	NO	NO
CNVR_1082	1	145306238	145381255	75018	DEL	3	66	1	1	1	25	13	11	13	1	YES	YES	NO	NO
CNVR_1084	1	145312352	145361563	49212	DEL	2	17	0	0	0	4	6	3	4	0	YES	YES	NO	NO
CNVR_1086	1	145305001	145435101	130101	CNV	2	102	16	0	16	17	26	14	12	1	YES	YES	NO	NO
CNVR_1088	1	145303139	145452500	149362	CNV	3	55	8	0	7	6	10	13	8	3	YES	YES	NO	NO
CNVR_1090	1	145312404	145402538	90135	CNV	3	146	20	1	19	35	31	22	17	1	YES	YES	NO	NO
CNVR_1096	1	145319244	145410182	90939	CNV	3	144	18	2	21	37	30	18	15	3	YES	YES	NO	NO
CNVR_1099	1	145325360	145415948	90589	CNV	3	132	22	2	21	35	25	15	9	3	YES	YES	NO	NO
CNVR_1101	1	145331760	145407457	75698	CNV	3	156	21	2	24	44	28	17	17	3	YES	YES	NO	NO
CNVR_1105	1	145336214	145450404	114191	CNV	3	66	4	1	3	18	20	9	9	2	YES	YES	NO	NO
CNVR_1107	1	145336254	145431003	94750	CNV	3	75	21	0	19	6	17	7	2	3	YES	YES	NO	NO
CNVR_1108	1	145336250	145401995	65746	CNV	3	120	17	1	19	31	20	16	13	3	YES	YES	NO	NO
CNVR_1110	1	145336250	145401995	65746	CNV	3	122	18	1	21	31	20	16	13	2	YES	YES	NO	NO
CNVR_1113	1	145336228	145450370	114143	CNV	2	61	8	1	7	11	19	7	6	2	YES	YES	NO	NO
CNVR_1115	1	145336276	145450461	114186	CNV	2	74	15	1	8	12	22	8	5	3	YES	YES	NO	NO
CNVR_1120	1	145346704	145438945	92242	CNV	2	52	11	0	12	5	14	7	0	3	YES	YES	NO	NO
CNVR_1128	1	145358666	145399938	41273	DEL	3	59	7	1	7	11	12	10	11	0	YES	YES	NO	NO
CNVR_1131	1	145359592	145452086	92495	CNV	3	77	1	3	2	33	16	10	12	0	YES	YES	NO	NO
CNVR_1143	1	145381816	145441696	59881	CNV	2	54	9	0	8	12	5	10	9	1	YES	YES	NO	NO
CNVR_1148	1	145387155	145404406	17252	DEL	2	10	0	1	0	1	2	2	4	0	YES	YES	NO	NO
CNVR_1150	1	145387807	145433980	46174	CNV	2	50	7	0	8	12	3	10	9	1	YES	YES	NO	NO
CNVR_1155	1	145387887	145452600	64714	CNV	2	32	8	0	6	4	10	4	0	0	YES	YES	NO	NO
CNVR_1163	1	145398390	145452900	54511	CNV	2	47	12	0	11	2	16	6	0	0	YES	YES	NO	NO
CNVR_1164	1	145399887	145436375	36489	DEL	2	66	15	0	20	8	11	10	1	1	YES	YES	NO	NO
CNVR_1165	1	145401123	145452600	51478	CNV	2	26	7	0	5	1	10	3	0	0	YES	YES	NO	NO
CNVR_1168	1	145409398	145437644	28247	DEL	2	59	11	1	15	11	11	8	1	1	YES	YES	NO	NO
CNVR_1195	1	147939426	148104628	165203	DEL	3	71	16	0	11	13	15	11	3	2	YES	YES	NO	NO
CNVR_1198	1	148609404	148612512	3109	DEL	3	10	1	0	3	0	1	4	0	1	YES	YES	NO	NO
CNVR_1204	1	149342969	149343982	1014	DEL	3	60	14	0	12	9	13	11	0	1	YES	YES	NO	NO
CNVR_1206	1	149380856	149382419	1564	DEL	4	108	22	1	16	25	17	18	7	2	YES	YES	NO	NO
CNVR_1210	1	149889251	149891632	2382	DEL	3	4	1	0	1	0	0	2	0	0	YES	YES	NO	NO
CNVR_1214	1	150060354	150061106	753	DEL	3	90	15	1	17	15	20	8	12	2	YES	YES	NO	NO
CNVR_1215	1	150062001	150107406	45406	DEL	3	77	22	0	21	8	15	7	1	3	YES	YES	NO	NO
CNVR_1219	1	151158026	151251890	93865	DEL	3	25	4	0	8	6	1	2	3	1	YES	YES	NO	NO
CNVR_1221	1	151310401	151311724	1324	DEL	3	53	14	0	11	16	7	0	3	2	YES	YES	NO	NO
CNVR_1227	1	152461649	152462156	508	DEL	2	15	0	0	2	5	2	4	2	0	YES	YES	NO	NO
CNVR_1234	1	153213756	153217991	4236	DUP	2	40	13	0	11	3	7	5	0	1	YES	YES	NO	NO
CNVR_1238	1	153470479	153472049	1571	DEL	3	123	21	3	24	24	18	17	13	3	YES	YES	NO	NO
CNVR_1240	1	153770027	153772388	2362	DEL	4	26	6	0	3	2	7	6	1	1	YES	YES	NO	NO
CNVR_1242	1	154241425	154253314	11890	DEL	2	26	7	0	8	1	5	3	0	2	YES	YES	NO	NO
CNVR_1245	1	154306513	154311000	4488	DEL	4	39	9	0	9	0	7	10	2	2	YES	YES	NO	NO
CNVR_1260	1	156786590	156788535	1946	DEL	3	30	2	0	3	10	9	1	5	0	YES	YES	NO	NO
CNVR_1279	1	158253501	158255000	1500	DEL	4	70	16	0	18	7	11	12	3	3	YES	YES	NO	NO
CNVR_1286	10	147751	149184	1434	DEL	3	30	9	0	6	1	6	5	0	3	YES	YES	NO	NO
CNVR_1288	10	688461	689187	727	DEL	3	43	9	0	3	12	11	6	2	0	YES	YES	NO	NO
CNVR_1290	10	899985	907500	7516	DEL	3	139	25	2	25	34	22	16	12	3	YES	YES	NO	NO
CNVR_1300	10	2269511	2270041	531	DEL	3	9	2	0	0	0	1	4	1	1	YES	YES	NO	NO
CNVR_1301	10	2272451	2273378	928	DEL	3	72	15	0	9	13	17	9	7	2	YES	YES	NO	NO
CNVR_1303	10	2627018	2628161	1144	DEL	4	61	14	0	9	9	16	8	3	2	YES	YES	NO	NO
CNVR_1305	10	2699327	2700760	1434	DEL	3	108	23	0	21	21	18	14	8	3	YES	YES	NO	NO
CNVR_1306	10	2859751	2863000	3250	DEL	4	60	9	0	9	13	14	9	4	2	YES	YES	NO	NO
CNVR_1310	10	3406251	3408077	1827	DEL	3	90	16	1	21	17	15	13	4	3	YES	YES	NO	NO
CNVR_1313	10	3770251	3773000	2750	DEL	3	70	18	0	15	12	12	8	3	2	YES	YES	NO	NO
CNVR_1314	10	4176874	4178500	1627	DEL	4	13	1	0	8	0	2	2	0	0	YES	YES	NO	NO
CNVR_1315	10	4201644	4203164	1521	DEL	2	57	14	0	15	7	10	6	2	3	YES	YES	NO	NO
CNVR_1316	10	4272039	4273553	1515	DEL	3	75	13	0	21	21	9	5	4	2	YES	YES	NO	NO
CNVR_1328	10	6546924	6547584	661	DEL	3	90	18	1	18	13	21	12	5	2	YES	YES	NO	NO
CNVR_1334	10	7026035	7027330	1296	DEL	4	101	23	0	19	20	18	13	6	2	YES	YES	NO	NO
CNVR_1343	10	8092471	8093159	689	DEL	3	31	4	0	11	2	10	1	2	1	YES	YES	NO	NO
CNVR_1350	10	8806251	8807841	1591	DEL	3	10	3	0	3	0	0	4	0	0	YES	YES	NO	NO
CNVR_1356	10	9716001	9718250	2250	DEL	3	163	25	2	25	46	22	24	16	3	YES	YES	NO	NO
CNVR_1358	10	9975501	9995400	19900	DUP	2	38	6	0	14	2	11	5	0	0	YES	YES	NO	NO
CNVR_1362	10	10469918	10471000	1083	DEL	4	132	25	0	25	24	24	21	10	3	YES	YES	NO	NO
CNVR_1367	10	11538518	11538989	472	DEL	3	28	3	0	2	12	3	5	2	1	YES	YES	NO	NO
CNVR_1371	10	12866839	12868624	1786	DEL	3	19	0	0	7	11	1	0	0	0	YES	YES	NO	NO
CNVR_1374	10	13390788	13391826	1039	DEL	3	14	0	0	7	1	1	3	0	2	YES	YES	NO	NO
CNVR_1385	10	15801460	15802952	1493	DEL	3	119	24	1	24	22	24	13	8	3	YES	YES	NO	NO
CNVR_1389	10	16766096	16766750	655	DEL	2	6	0	0	2	1	1	2	0	0	YES	YES	NO	NO
CNVR_1394	10	17772601	17789000	16400	DUP	3	19	6	0	10	0	3	0	0	0	YES	NO	YES	NO
CNVR_1396	10	17842251	17846000	3750	DEL	3	104	16	0	11	34	19	14	7	3	YES	YES	NO	NO
CNVR_1405	10	19855501	19863250	7750	DEL	4	62	12	0	14	13	14	6	2	1	YES	YES	NO	NO
CNVR_1415	10	22066587	22068632	2046	DEL	3	178	25	3	25	53	27	26	16	3	YES	YES	NO	NO
CNVR_1417	10	22262989	22263829	841	DEL	4	38	4	0	13	7	6	4	1	3	YES	YES	NO	NO
CNVR_1423	10	22493983	22500250	6268	DEL	3	22	7	0	6	0	4	3	1	1	YES	YES	NO	NO
CNVR_1426	10	22526591	25267663	2741073	CNV	3	54	7	1	6	15	8	10	6	1	YES	YES	NO	YES
CNVR_1427	10	22530291	24668156	2137866	CNV	3	45	6	0	6	11	6	9	6	1	YES	YES	NO	YES
CNVR_1430	10	22586186	23794535	1208350	DEL	2	19	2	0	2	5	3	4	3	0	YES	NO	YES	NO
CNVR_1435	10	22699322	22793278	93957	DEL	3	31	5	0	6	9	4	5	2	0	YES	YES	NO	NO
CNVR_1439	10	22833948	23577776	743829	DEL	3	61	8	0	8	17	10	11	5	2	YES	YES	NO	YES
CNVR_1450	10	23118251	25023840	1905590	CNV	3	109	12	2	17	34	19	15	8	2	YES	YES	NO	YES
CNVR_1453	10	23164416	23172539	8124	DEL	3	45	11	0	10	7	10	5	0	2	YES	YES	NO	NO
CNVR_1458	10	23367942	25375166	2007225	DEL	3	83	12	2	15	20	17	8	7	2	YES	YES	NO	NO
CNVR_1459	10	23377915	24565453	1187539	DEL	3	23	3	0	3	4	5	5	2	1	YES	YES	NO	NO
CNVR_1469	10	23654701	23750000	95300	DEL	3	21	6	0	3	1	7	2	0	2	YES	YES	NO	NO
CNVR_1473	10	23927578	23972764	45187	CNV	3	32	7	0	11	2	8	2	1	1	YES	YES	NO	NO
CNVR_1475	10	24086637	25393338	1306702	DEL	2	11	0	0	0	4	1	6	0	0	YES	YES	NO	YES
CNVR_1477	10	24153234	24154668	1435	DEL	3	36	6	0	12	3	7	6	0	2	YES	YES	NO	NO
CNVR_1484	10	24359904	24459862	99959	DEL	2	21	6	0	6	0	3	5	0	1	YES	YES	NO	NO
CNVR_1489	10	24570435	24571979	1545	DEL	3	46	10	0	10	3	13	6	1	3	YES	YES	NO	NO
CNVR_1497	10	24895251	24897867	2617	DEL	3	8	1	0	1	0	1	5	0	0	YES	YES	NO	NO
CNVR_1500	10	25020681	25021299	619	DEL	3	35	6	0	10	3	4	6	4	2	YES	YES	NO	NO
CNVR_1501	10	25231101	25232046	946	DEL	3	63	16	0	8	13	19	4	1	2	YES	YES	NO	NO
CNVR_1505	10	25419316	25473670	54355	DEL	2	8	2	0	1	0	1	2	1	1	YES	YES	NO	NO
CNVR_1511	10	25476359	25500437	24079	DEL	2	15	0	0	2	1	0	10	2	0	YES	YES	NO	NO
CNVR_1521	10	26223675	26224577	903	DEL	3	45	10	0	16	0	11	5	0	3	YES	YES	NO	NO
CNVR_1522	10	26484647	26485769	1123	DEL	4	143	25	1	25	39	20	16	14	3	YES	YES	NO	NO
CNVR_1525	10	26730792	26731520	729	DEL	3	23	5	1	8	1	0	5	3	0	YES	YES	NO	NO
CNVR_1528	10	26911371	26913750	2380	DEL	3	6	0	0	2	0	1	3	0	0	YES	YES	NO	NO
CNVR_1534	10	27101289	27102486	1198	DEL	4	42	12	0	9	8	5	5	2	1	YES	YES	NO	NO
CNVR_1535	10	27103501	27107000	3500	DEL	3	54	8	0	11	10	11	9	4	1	YES	YES	NO	NO
CNVR_1536	10	27110230	27111900	1671	DEL	3	25	9	0	7	4	0	3	1	1	YES	YES	NO	NO
CNVR_1539	10	27154062	27600561	446500	DEL	2	53	13	0	14	5	12	5	1	3	YES	YES	NO	NO
CNVR_1540	10	27233701	27235139	1439	DEL	4	34	10	0	8	1	6	5	2	2	YES	YES	NO	NO
CNVR_1542	10	27325223	27326877	1655	DEL	4	47	10	0	5	22	5	1	2	2	YES	YES	NO	NO
CNVR_1544	10	27399251	27406250	7000	DEL	3	135	23	3	25	29	27	20	5	3	YES	YES	NO	NO
CNVR_1546	10	27475325	27476886	1562	DEL	3	106	22	1	21	27	17	12	3	3	YES	YES	NO	NO
CNVR_1547	10	27508834	27509912	1079	DEL	3	62	15	0	8	12	14	10	2	1	YES	YES	NO	NO
CNVR_1549	10	27575290	27584496	9207	DEL	3	78	21	0	18	10	16	8	2	3	YES	YES	NO	NO
CNVR_1552	10	27634201	27663250	29050	DEL	4	28	12	0	1	2	8	4	0	1	YES	YES	NO	NO
CNVR_1555	10	27726501	27737750	11250	DUP	2	28	10	0	8	2	3	4	0	1	YES	YES	NO	NO
CNVR_1557	10	27746826	27747445	620	DEL	3	25	7	0	5	3	7	3	0	0	YES	YES	NO	NO
CNVR_1559	10	27767008	27769516	2509	DEL	3	15	9	0	1	0	1	3	0	1	YES	YES	NO	NO
CNVR_1568	10	27933074	27934615	1542	DEL	2	11	5	0	3	0	0	2	0	1	YES	YES	NO	NO
CNVR_1570	10	27967047	27967919	873	DEL	3	55	14	0	11	11	10	4	4	1	YES	YES	NO	NO
CNVR_1571	10	27983893	27986099	2207	DEL	3	28	11	0	7	3	3	3	0	1	YES	YES	NO	NO
CNVR_1572	10	27992382	27993444	1063	DEL	3	56	17	1	11	14	7	3	2	1	YES	YES	NO	NO
CNVR_1574	10	28060894	28063250	2357	DEL	3	94	16	1	13	31	18	7	6	2	YES	YES	NO	NO
CNVR_1576	10	28131501	28140000	8500	DEL	3	22	8	0	7	0	3	2	0	2	YES	YES	NO	NO
CNVR_1584	10	29880501	29883065	2565	DEL	4	24	5	0	7	0	1	9	0	2	YES	YES	NO	NO
CNVR_1585	10	29899294	29900635	1342	DEL	3	138	23	1	25	30	21	21	14	3	YES	YES	NO	NO
CNVR_1589	10	30645501	30647368	1868	DEL	4	5	0	0	0	0	0	5	0	0	YES	YES	NO	NO
CNVR_1593	10	31428133	31454777	26645	DEL	2	45	11	0	12	5	10	3	2	2	YES	YES	NO	NO
CNVR_1596	10	31969501	31971559	2059	DEL	4	24	4	0	10	2	1	5	1	1	YES	YES	NO	NO
CNVR_1605	10	33073501	33080750	7250	DEL	3	88	13	2	12	37	9	9	3	3	YES	YES	NO	NO
CNVR_1606	10	33308713	33310277	1565	DEL	3	75	12	1	18	13	17	8	4	2	YES	YES	NO	NO
CNVR_1611	10	34475841	34481500	5660	DEL	4	172	24	2	25	51	23	26	18	3	YES	YES	NO	NO
CNVR_1624	10	37966427	37967809	1383	DEL	3	58	4	0	18	17	12	6	0	1	YES	YES	NO	NO
CNVR_1626	10	38461934	38462812	879	DEL	3	78	22	0	21	8	15	7	3	2	YES	YES	NO	NO
CNVR_1627	10	38605236	38606417	1182	DEL	3	63	7	0	18	14	11	9	2	2	YES	YES	NO	NO
CNVR_1634	10	39320251	39327750	7500	DEL	3	144	24	1	25	36	19	22	14	3	YES	YES	NO	NO
CNVR_1643	10	40082290	40083216	927	DEL	2	33	12	0	8	2	6	4	1	0	YES	YES	NO	NO
CNVR_1648	10	40435093	40436919	1827	DEL	4	81	9	1	6	33	12	16	2	2	YES	YES	NO	NO
CNVR_1652	10	41107021	41107740	720	DEL	3	39	11	0	3	7	7	4	7	0	YES	YES	NO	NO
CNVR_1653	10	41240346	41243000	2655	DEL	4	21	5	0	5	0	4	7	0	0	YES	YES	NO	NO
CNVR_1655	10	41417957	41419009	1053	DEL	3	49	6	0	18	10	8	1	3	3	YES	YES	NO	NO
CNVR_1656	10	41554804	41555503	700	DEL	3	27	6	0	8	6	3	2	0	2	YES	YES	NO	NO
CNVR_1657	10	41581251	41601300	20050	DEL	4	63	11	0	15	18	9	5	2	3	YES	YES	NO	NO
CNVR_1659	10	41668501	41669925	1425	DEL	3	27	11	0	1	5	6	4	0	0	YES	YES	NO	NO
CNVR_1667	10	43408374	43441595	33222	DEL	2	34	6	0	4	6	4	6	6	2	YES	YES	NO	NO
CNVR_1672	10	44020474	44022784	2311	DEL	4	11	0	0	1	2	1	6	1	0	YES	YES	NO	NO
CNVR_1673	10	44065750	44205215	139466	DEL	2	44	10	0	10	5	8	7	1	3	YES	YES	NO	NO
CNVR_1674	10	44066444	44068000	1557	DEL	3	90	24	0	23	10	16	10	4	3	YES	YES	NO	NO
CNVR_1677	10	44263621	44265926	2306	DEL	4	149	25	1	25	36	24	24	11	3	YES	YES	NO	NO
CNVR_1678	10	44399001	44403000	4000	DEL	3	43	2	2	1	24	1	8	5	0	YES	YES	NO	NO
CNVR_1680	10	44655875	44656551	677	DEL	4	45	4	0	8	9	6	13	4	1	YES	YES	NO	NO
CNVR_1681	10	45542961	45544272	1312	DEL	3	61	12	0	15	9	8	11	3	3	YES	YES	NO	NO
CNVR_1695	10	48197247	48197934	688	DEL	3	21	4	1	5	1	5	2	3	0	YES	YES	NO	NO
CNVR_1698	10	48861001	48863590	2590	DEL	3	39	9	0	10	0	10	6	3	1	YES	YES	NO	NO
CNVR_1703	10	50374737	50375403	667	DEL	3	19	2	0	11	0	0	6	0	0	YES	YES	NO	NO
CNVR_1708	10	51977501	51978957	1457	DEL	4	142	24	0	25	38	21	20	11	3	YES	YES	NO	NO
CNVR_1717	10	53876132	53930178	54047	DEL	3	49	7	1	6	9	9	7	9	1	YES	YES	NO	NO
CNVR_1718	10	53955111	53955987	877	DEL	3	149	24	0	25	37	27	21	12	3	YES	YES	NO	NO
CNVR_1719	10	54168118	54168878	761	DEL	3	51	10	0	9	6	7	14	5	0	YES	YES	NO	NO
CNVR_1728	10	55725751	55727603	1853	DEL	4	58	15	0	18	3	7	7	7	1	YES	YES	NO	NO
CNVR_1729	10	55923463	55925374	1912	DEL	3	28	8	0	2	3	11	3	1	0	YES	YES	NO	NO
CNVR_1733	10	56016818	56017483	666	DEL	3	17	4	0	7	1	2	2	0	1	YES	YES	NO	NO
CNVR_1735	10	56117271	56118500	1230	DEL	3	42	4	0	13	4	5	9	4	3	YES	YES	NO	NO
CNVR_1736	10	56179726	56181600	1875	DEL	4	46	16	0	14	0	10	5	0	1	YES	YES	NO	NO
CNVR_1739	10	56468543	56473060	4518	DEL	2	76	15	0	21	9	16	10	2	3	YES	YES	NO	NO
CNVR_1745	10	56606164	56608080	1917	DEL	4	127	24	0	24	29	22	12	13	3	YES	YES	NO	NO
CNVR_1753	10	57590460	57591514	1055	DEL	3	107	21	1	25	17	16	16	9	2	YES	YES	NO	NO
CNVR_1758	10	59267860	59268612	753	DEL	2	41	6	0	8	7	8	6	3	3	YES	YES	NO	NO
CNVR_1762	10	59477251	59536355	59105	CNV	2	5	1	0	0	0	1	3	0	0	YES	YES	NO	NO
CNVR_1770	10	60728164	60729144	981	DEL	3	86	11	0	18	23	10	13	9	2	YES	YES	NO	NO
CNVR_1774	10	61250186	61251691	1506	DEL	3	76	8	1	12	16	20	7	12	0	YES	YES	NO	NO
CNVR_1779	10	63168120	63169351	1232	DEL	4	82	19	0	11	17	11	15	6	3	YES	YES	NO	NO
CNVR_1786	10	63935501	63938312	2812	DEL	3	145	22	1	23	43	22	16	15	3	YES	YES	NO	NO
CNVR_1790	10	64466001	64475818	9818	DEL	3	4	0	0	0	1	0	3	0	0	YES	YES	NO	NO
CNVR_1794	10	64667939	64669446	1508	DEL	3	31	5	0	13	5	5	3	0	0	YES	YES	NO	NO
CNVR_1795	10	64671596	64672673	1078	DEL	3	101	23	2	25	12	24	12	1	2	YES	YES	NO	NO
CNVR_1796	10	64997501	65007750	10250	DEL	3	118	19	1	24	24	16	20	11	3	YES	YES	NO	NO
CNVR_1797	10	65251051	65257185	6135	DEL	3	92	20	0	9	31	11	16	4	1	YES	YES	NO	NO
CNVR_1798	10	65651976	65653233	1258	DEL	2	26	4	0	5	7	2	8	0	0	YES	YES	NO	NO
CNVR_1799	10	65686459	65687536	1078	DEL	3	42	12	0	9	2	11	8	0	0	YES	YES	NO	NO
CNVR_1800	10	66087282	66164786	77505	DEL	3	51	10	0	12	9	8	5	6	1	YES	YES	NO	NO
CNVR_1803	10	66349491	66351369	1879	DEL	3	110	21	2	21	27	13	13	10	3	YES	YES	NO	NO
CNVR_1805	10	67037709	67040789	3081	DEL	4	135	24	2	24	24	21	23	14	3	YES	YES	NO	NO
CNVR_1808	10	67592859	67593467	609	DEL	3	9	0	0	0	5	0	4	0	0	YES	YES	NO	NO
CNVR_1816	10	69598203	69599054	852	DEL	3	101	22	0	22	21	12	14	7	3	YES	YES	NO	NO
CNVR_1817	10	70012179	70014416	2238	DEL	3	52	12	0	19	1	13	3	1	3	YES	YES	NO	NO
CNVR_1826	10	74392481	74393341	861	DEL	3	8	0	0	3	0	1	4	0	0	YES	YES	NO	NO
CNVR_1840	10	76486948	76488250	1303	DEL	3	11	1	0	2	3	0	5	0	0	YES	YES	NO	NO
CNVR_1843	10	77042894	77044072	1179	DEL	3	103	21	0	23	23	19	8	7	2	YES	YES	NO	NO
CNVR_1861	10	80954207	80955279	1073	DEL	3	103	24	0	25	17	17	9	8	3	YES	YES	NO	NO
CNVR_1864	10	81508480	81512250	3771	DEL	4	32	2	0	4	17	7	0	1	1	YES	YES	NO	NO
CNVR_1876	10	84279222	84279592	371	DEL	2	2	0	0	0	0	0	2	0	0	YES	YES	NO	NO
CNVR_1877	10	84341037	84342805	1769	DEL	2	40	8	0	14	2	6	7	1	2	YES	YES	NO	NO
CNVR_1883	10	85398836	85400329	1494	DEL	4	89	20	1	15	12	20	12	8	1	YES	YES	NO	NO
CNVR_1884	10	85403087	85404750	1664	DEL	3	86	18	0	14	19	15	12	6	2	YES	YES	NO	NO
CNVR_1885	10	85422657	85424566	1910	DEL	4	94	17	0	15	15	15	20	11	1	YES	YES	NO	NO
CNVR_1893	10	87169156	87898530	729375	DEL	3	4	0	0	1	0	0	3	0	0	YES	YES	NO	NO
CNVR_1899	10	88424680	88425919	1240	DEL	4	99	23	0	22	21	13	12	5	3	YES	YES	NO	NO
CNVR_1914	10	91037501	91039750	2250	DEL	3	105	10	2	17	32	9	17	16	2	YES	YES	NO	NO
CNVR_1925	10	91916174	91917254	1081	DEL	3	95	23	0	19	9	20	17	5	2	YES	YES	NO	NO
CNVR_1926	10	91989648	91990437	790	DEL	2	38	10	0	6	4	9	6	1	2	YES	YES	NO	NO
CNVR_1927	10	91989789	91990437	649	DEL	2	18	5	0	0	2	5	5	0	1	YES	YES	NO	NO
CNVR_1931	10	92272251	92274013	1763	DEL	3	79	21	0	22	10	15	7	1	3	YES	YES	NO	NO
CNVR_1935	10	93468901	93474919	6019	DEL	4	48	13	0	10	2	10	7	4	2	YES	YES	NO	NO
CNVR_1940	10	94314438	94315357	920	DEL	3	22	7	0	7	1	4	2	1	0	YES	YES	NO	NO
CNVR_1941	10	94314664	94315330	667	DEL	3	37	9	0	9	3	9	5	0	2	YES	YES	NO	NO
CNVR_1955	10	95662673	95664600	1928	DEL	3	68	21	0	22	2	11	7	2	3	YES	YES	NO	NO
CNVR_1961	10	96112622	96113578	957	DEL	3	94	20	0	21	15	17	13	5	3	YES	YES	NO	NO
CNVR_1962	10	96163453	96164288	836	DEL	2	48	12	0	10	7	7	9	1	2	YES	YES	NO	NO
CNVR_1963	10	96310456	96313598	3143	DEL	4	162	24	0	25	47	23	24	16	3	YES	YES	NO	NO
CNVR_1973	10	98210552	98212135	1584	DEL	3	104	17	2	21	32	14	5	10	3	YES	YES	NO	NO
CNVR_1979	10	99449814	99450841	1028	DEL	3	68	21	0	17	8	16	4	2	0	YES	YES	NO	NO
CNVR_1980	10	99547887	99549613	1727	DEL	3	52	16	0	12	3	12	6	1	2	YES	YES	NO	NO
CNVR_1981	10	99604175	99606600	2426	DEL	4	59	8	1	15	9	7	14	2	3	YES	YES	NO	NO
CNVR_1989	10	100285560	100286258	699	DEL	3	97	21	1	11	22	21	10	9	2	YES	YES	NO	NO
CNVR_1991	10	101159881	101161589	1709	DEL	4	53	10	0	18	3	10	8	1	3	YES	YES	NO	NO
CNVR_2008	10	102989914	102991623	1710	DEL	3	47	7	0	11	5	3	11	7	3	YES	YES	NO	NO
CNVR_2018	10	104139860	104140742	883	DEL	3	52	15	0	11	6	10	4	3	3	YES	YES	NO	NO
CNVR_2020	10	104291722	104298798	7077	DEL	2	8	1	0	0	1	0	2	3	1	YES	YES	NO	NO
CNVR_2021	11	868	72764	71897	DEL	2	57	9	0	14	13	8	10	3	0	YES	YES	NO	NO
CNVR_2026	11	184847	186396	1550	DEL	3	119	24	1	25	27	20	13	6	3	YES	YES	NO	NO
CNVR_2031	11	573001	574342	1342	DEL	3	48	10	0	10	11	9	4	2	2	YES	YES	NO	NO
CNVR_2033	11	681120	681906	787	DEL	3	68	15	0	16	9	11	11	3	3	YES	YES	NO	NO
CNVR_2045	11	2124361	2125398	1038	DEL	4	84	23	0	22	16	11	7	2	3	YES	YES	NO	NO
CNVR_2046	11	2137111	2138167	1057	DEL	4	63	8	0	18	21	5	5	3	3	YES	YES	NO	NO
CNVR_2051	11	2900294	2902000	1707	DEL	4	60	11	0	19	14	12	2	0	2	YES	YES	NO	NO
CNVR_2052	11	3027222	3028270	1049	DEL	2	34	8	0	9	1	8	6	1	1	YES	YES	NO	NO
CNVR_2054	11	3425627	3426603	977	DEL	4	59	9	1	15	20	5	4	3	2	YES	YES	NO	NO
CNVR_2056	11	3997501	4002013	4513	DEL	4	43	2	0	7	11	14	5	2	2	YES	YES	NO	NO
CNVR_2062	11	4898400	5538717	640318	DEL	2	17	6	0	1	0	4	4	0	2	YES	YES	NO	NO
CNVR_2069	11	5562500	5563348	849	DEL	2	29	5	0	6	2	7	3	4	2	YES	YES	NO	NO
CNVR_2070	11	5585562	5586750	1189	DEL	4	40	8	0	10	5	10	2	2	3	YES	YES	NO	NO
CNVR_2071	11	5830432	5831242	811	DEL	2	34	9	0	7	3	7	6	0	2	YES	YES	NO	NO
CNVR_2072	11	5897159	5898251	1093	DEL	3	3	0	0	0	0	0	3	0	0	YES	YES	NO	NO
CNVR_2076	11	6600026	6601193	1168	DEL	3	92	21	1	19	19	9	9	11	3	YES	YES	NO	NO
CNVR_2089	11	8430946	8431677	732	DEL	2	54	13	0	12	6	12	6	2	3	YES	YES	NO	NO
CNVR_2090	11	9593501	9598750	5250	DEL	3	48	2	0	11	10	14	5	3	3	YES	YES	NO	NO
CNVR_2093	11	9721427	9722215	789	DEL	3	39	12	0	8	4	7	7	0	1	YES	YES	NO	NO
CNVR_2121	11	14163148	14165150	2003	DEL	2	16	3	0	1	1	2	3	6	0	YES	YES	NO	NO
CNVR_2131	11	14976706	14977764	1059	DEL	3	33	10	0	10	0	7	4	0	2	YES	YES	NO	NO
CNVR_2133	11	16472932	16479250	6319	DEL	3	50	15	0	5	7	16	5	1	1	YES	YES	NO	NO
CNVR_2138	11	16910290	16910980	691	DEL	3	57	11	0	12	10	15	5	2	2	YES	YES	NO	NO
CNVR_2139	11	17031872	17033029	1158	DEL	3	63	11	0	8	18	12	5	7	2	YES	YES	NO	NO
CNVR_2141	11	17270394	17272575	2182	DEL	4	79	9	0	17	23	14	7	7	2	YES	YES	NO	NO
CNVR_2143	11	17723841	17724693	853	DEL	3	97	18	0	16	29	15	5	12	2	YES	YES	NO	NO
CNVR_2148	11	18522659	18523500	842	DEL	3	6	1	0	2	0	0	3	0	0	YES	YES	NO	NO
CNVR_2151	11	19423477	19425150	1674	DEL	3	103	13	0	20	30	19	17	3	1	YES	YES	NO	NO
CNVR_2160	11	20986365	20987852	1488	DEL	3	40	7	0	11	0	5	11	5	1	YES	YES	NO	NO
CNVR_2164	11	21643636	21644456	821	DEL	3	15	4	0	0	0	5	3	3	0	YES	YES	NO	NO
CNVR_2171	11	23220609	23221794	1186	DEL	2	28	6	0	7	1	6	5	0	3	YES	YES	NO	NO
CNVR_2176	11	23550799	23551465	667	DEL	3	84	20	1	18	13	15	12	3	2	YES	YES	NO	NO
CNVR_2181	11	24058023	24059211	1189	DEL	3	84	16	0	19	14	13	11	8	3	YES	YES	NO	NO
CNVR_2193	11	27359428	27360440	1013	DEL	2	41	10	0	8	1	13	6	0	3	YES	YES	NO	NO
CNVR_2196	11	27849112	31324038	3474927	DEL	2	46	2	0	8	5	10	9	10	2	YES	YES	NO	NO
CNVR_2198	11	28157856	28158859	1004	DEL	4	56	8	0	12	20	5	6	3	2	YES	YES	NO	NO
CNVR_2199	11	28563876	28564693	818	DEL	3	101	20	0	23	15	21	15	4	3	YES	YES	NO	NO
CNVR_2202	11	29198660	29199863	1204	DEL	3	62	16	0	15	7	13	8	1	2	YES	YES	NO	NO
CNVR_2203	11	29221809	29222619	811	DEL	3	38	4	0	16	3	5	7	1	2	YES	YES	NO	NO
CNVR_2214	11	31179623	31180476	854	DEL	3	97	19	1	16	17	16	15	10	3	YES	YES	NO	NO
CNVR_2217	11	31695928	31703000	7073	DEL	3	114	24	1	19	25	14	20	8	3	YES	YES	NO	NO
CNVR_2229	11	33520042	33521500	1459	DEL	3	52	11	0	16	4	11	0	8	2	YES	YES	NO	NO
CNVR_2231	11	33695001	33696572	1572	DEL	3	143	21	2	19	44	21	20	13	3	YES	YES	NO	NO
CNVR_2234	11	33916192	33917390	1199	DEL	3	92	18	0	15	25	17	8	6	3	YES	YES	NO	NO
CNVR_2236	11	34334326	34335429	1104	DEL	4	62	13	0	9	16	11	7	4	2	YES	YES	NO	NO
CNVR_2244	11	35451523	35456311	4789	DEL	3	77	12	0	13	15	16	10	9	2	YES	YES	NO	NO
CNVR_2246	11	35542957	35543891	935	DEL	3	39	8	0	11	9	7	2	2	0	YES	YES	NO	NO
CNVR_2250	11	35882993	35884308	1316	DEL	4	117	14	1	24	27	20	20	8	3	YES	YES	NO	NO
CNVR_2254	11	36296701	36309000	12300	DEL	4	44	6	0	14	7	5	6	3	3	YES	YES	NO	NO
CNVR_2256	11	37404174	37406100	1927	DEL	4	62	16	0	15	6	8	7	7	3	YES	YES	NO	NO
CNVR_2260	11	37805151	37805748	598	DEL	3	43	6	1	1	12	7	9	7	0	YES	YES	NO	NO
CNVR_2263	11	38638488	38639174	687	DEL	3	19	1	0	5	4	1	4	4	0	YES	YES	NO	NO
CNVR_2268	11	39553501	39554455	955	DEL	3	65	12	0	16	9	13	7	5	3	YES	YES	NO	NO
CNVR_2270	11	39603246	39603971	726	DEL	3	18	1	0	3	1	7	4	2	0	YES	YES	NO	NO
CNVR_2276	11	39929063	39934000	4938	DEL	3	35	5	0	12	1	7	6	1	3	YES	YES	NO	NO
CNVR_2279	11	40526745	40529825	3081	DEL	4	81	20	0	23	10	17	7	1	3	YES	YES	NO	NO
CNVR_2282	11	40539415	40540601	1187	DEL	4	28	7	0	7	0	9	3	2	0	YES	YES	NO	NO
CNVR_2290	11	41324818	41325421	604	DEL	3	53	10	0	10	12	11	5	4	1	YES	YES	NO	NO
CNVR_2292	11	42204362	42205545	1184	DEL	3	34	3	0	13	4	3	5	5	1	YES	YES	NO	NO
CNVR_2295	11	43462479	43463383	905	DEL	3	34	3	0	3	16	4	4	2	2	YES	YES	NO	NO
CNVR_2303	11	45050884	45051749	866	DEL	4	82	22	0	22	4	20	9	2	3	YES	YES	NO	NO
CNVR_2306	11	46011711	46012283	573	DEL	3	42	9	0	11	8	4	7	2	1	YES	YES	NO	NO
CNVR_2307	11	46061501	46063800	2300	DEL	4	51	9	0	16	6	12	5	0	3	YES	YES	NO	NO
CNVR_2312	11	47034251	47036836	2586	DEL	4	73	19	1	13	20	6	10	2	2	YES	YES	NO	NO
CNVR_2325	11	48725862	48726736	875	DEL	3	36	5	0	9	1	9	10	1	1	YES	YES	NO	NO
CNVR_2329	11	49048548	49096200	47653	CNV	3	46	5	0	10	6	8	9	7	1	YES	YES	NO	NO
CNVR_2330	11	49067052	49108000	40949	DEL	3	82	19	1	20	11	14	9	6	2	YES	YES	NO	NO
CNVR_2333	11	49130635	49132216	1582	DEL	3	25	5	0	12	0	4	3	1	0	YES	YES	NO	NO
CNVR_2334	11	49587001	49590500	3500	DEL	3	28	4	0	8	4	6	5	1	0	YES	YES	NO	NO
CNVR_2338	11	50075190	50075990	801	DEL	3	124	23	2	23	27	22	16	8	3	YES	YES	NO	NO
CNVR_2343	11	50436826	50437203	378	DEL	3	11	0	0	1	3	1	3	2	1	YES	YES	NO	NO
CNVR_2351	11	50572080	50573500	1421	DEL	4	83	19	0	14	14	19	11	3	3	YES	YES	NO	NO
CNVR_2352	11	50803830	51466114	662285	DEL	2	16	1	0	0	2	2	7	4	0	YES	YES	NO	NO
CNVR_2359	11	51401274	51402888	1615	DEL	3	51	4	1	19	8	10	4	3	2	YES	YES	NO	NO
CNVR_2360	11	51486172	51488253	2082	DEL	4	112	18	1	17	26	18	19	10	3	YES	YES	NO	NO
CNVR_2364	11	51911332	51913590	2259	DEL	4	47	14	0	11	4	10	4	3	1	YES	YES	NO	NO
CNVR_2365	11	52118696	52119957	1262	DEL	3	93	22	0	21	14	17	11	5	3	YES	YES	NO	NO
CNVR_2367	11	52407891	52411364	3474	DEL	4	6	0	0	1	0	0	5	0	0	YES	YES	NO	NO
CNVR_2379	11	53233468	53235000	1533	DEL	3	147	24	0	25	43	25	14	13	3	YES	YES	NO	NO
CNVR_2385	11	54263001	54266573	3573	DEL	3	121	20	1	23	26	20	18	10	3	YES	YES	NO	NO
CNVR_2399	11	56111772	56112371	600	DEL	3	12	3	0	2	2	2	3	0	0	YES	YES	NO	NO
CNVR_2418	11	57532499	57535250	2752	DEL	3	40	4	0	14	8	6	2	4	2	YES	YES	NO	NO
CNVR_2421	11	57804251	57812400	8150	DEL	4	53	16	0	13	1	12	8	0	3	YES	YES	NO	NO
CNVR_2435	11	59558565	59559267	703	DEL	3	95	19	0	16	21	21	9	7	2	YES	YES	NO	NO
CNVR_2441	11	60390841	60392250	1410	DEL	4	61	15	0	14	4	19	6	0	3	YES	YES	NO	NO
CNVR_2443	11	60468296	61554230	1085935	DEL	2	19	3	0	1	4	1	9	1	0	YES	YES	NO	NO
CNVR_2448	11	61321995	61327000	5006	DEL	4	7	0	0	0	2	1	4	0	0	YES	YES	NO	NO
CNVR_2457	11	62157799	62159432	1634	DEL	3	31	6	0	3	12	5	3	0	2	YES	YES	NO	NO
CNVR_2459	11	62227251	62235000	7750	DEL	4	67	14	1	6	18	11	8	7	2	YES	YES	NO	NO
CNVR_2463	11	62499388	62500302	915	DEL	3	82	16	0	19	17	21	5	2	2	YES	YES	NO	NO
CNVR_2466	11	63185576	63187125	1550	DEL	4	74	1	3	3	35	2	16	13	1	YES	YES	NO	NO
CNVR_2476	11	65602696	65603565	870	DEL	3	13	3	0	3	1	0	5	1	0	YES	YES	NO	NO
CNVR_2478	11	65852678	65855407	2730	DEL	3	168	25	2	25	50	23	24	16	3	YES	YES	NO	NO
CNVR_2480	11	66065787	66066745	959	DEL	3	72	16	0	9	20	13	7	4	3	YES	YES	NO	NO
CNVR_2491	11	68621251	68623540	2290	DEL	4	19	0	0	3	6	3	5	1	1	YES	YES	NO	NO
CNVR_2492	11	69255286	69256612	1327	DEL	4	132	21	1	24	34	22	16	11	3	YES	YES	NO	NO
CNVR_2493	11	69296094	69297800	1707	DEL	3	29	3	0	7	0	13	1	5	0	YES	YES	NO	NO
CNVR_2494	11	69354601	69378500	23900	DEL	4	43	4	0	14	15	3	4	1	2	YES	YES	NO	NO
CNVR_2495	11	69380251	69386250	6000	DEL	4	76	11	0	22	11	16	8	5	3	YES	YES	NO	NO
CNVR_2502	11	70744126	70745337	1212	DEL	4	44	12	0	4	3	14	6	4	1	YES	YES	NO	NO
CNVR_2505	11	71349944	71350586	643	DEL	3	6	1	0	1	0	0	4	0	0	YES	YES	NO	NO
CNVR_2506	11	71716880	71717963	1084	DEL	3	7	1	0	0	1	0	4	1	0	YES	YES	NO	NO
CNVR_2509	11	72801778	72802677	900	DEL	4	103	23	1	25	17	17	12	5	3	YES	YES	NO	NO
CNVR_2516	11	75208189	76902690	1694502	DEL	3	61	18	1	13	10	7	6	4	2	YES	YES	NO	NO
CNVR_2517	11	75296974	75297965	992	DEL	3	76	20	0	19	10	10	9	5	3	YES	YES	NO	NO
CNVR_2518	11	75303832	75305812	1981	DEL	4	61	15	0	18	6	10	8	1	3	YES	YES	NO	NO
CNVR_2526	11	76464452	76466151	1700	DEL	3	158	24	3	21	48	24	23	12	3	YES	YES	NO	NO
CNVR_2528	11	76710267	76710671	405	DEL	2	5	0	0	1	0	1	2	0	1	YES	YES	NO	NO
CNVR_2531	11	76946751	76948856	2106	DEL	2	6	1	0	1	1	0	3	0	0	YES	YES	NO	NO
CNVR_2532	11	76956751	76959250	2500	DEL	4	19	1	0	6	2	3	5	1	1	YES	YES	NO	NO
CNVR_2533	11	77122369	77122891	523	DEL	3	5	0	0	0	0	1	4	0	0	YES	YES	NO	NO
CNVR_2534	11	78480743	78482871	2129	DEL	3	19	0	1	1	6	4	0	7	0	YES	YES	NO	NO
CNVR_2535	11	78572962	78574127	1166	DEL	3	5	0	0	2	0	0	3	0	0	YES	YES	NO	NO
CNVR_2537	11	79505139	79505957	819	DEL	3	55	7	0	8	8	16	11	3	2	YES	YES	NO	NO
CNVR_2542	11	80529687	80530260	574	DEL	2	20	0	1	1	10	1	4	3	0	YES	YES	NO	NO
CNVR_2549	11	81807000	81905091	98092	DEL	3	32	9	0	9	4	3	5	2	0	YES	YES	NO	NO
CNVR_2550	11	81836881	81837394	514	DEL	2	5	0	0	0	1	0	4	0	0	YES	YES	NO	NO
CNVR_2552	11	82418356	82419539	1184	DEL	3	80	22	0	15	11	12	9	8	3	YES	YES	NO	NO
CNVR_2553	11	82499736	82501250	1515	DEL	4	75	24	1	12	13	7	12	4	2	YES	YES	NO	NO
CNVR_2554	11	82943965	82945840	1876	DEL	4	84	23	0	14	17	18	6	3	3	YES	YES	NO	NO
CNVR_2556	11	84073751	84078500	4750	DEL	4	78	23	0	19	9	13	10	1	3	YES	YES	NO	NO
CNVR_2571	11	86451947	86452725	779	DEL	2	54	14	0	10	9	11	6	3	1	YES	YES	NO	NO
CNVR_2574	11	87184823	87185633	811	DEL	3	44	10	0	15	8	3	5	2	1	YES	YES	NO	NO
CNVR_2575	11	87184919	87185748	830	DEL	3	13	4	0	4	1	2	2	0	0	YES	YES	NO	NO
CNVR_2577	11	87868978	87870782	1805	DEL	2	34	0	0	0	16	7	6	5	0	YES	YES	NO	NO
CNVR_2588	11	90328897	90329885	989	DEL	2	21	4	0	5	3	3	3	2	1	YES	YES	NO	NO
CNVR_2594	11	90719075	90719918	844	DEL	3	124	23	0	24	27	19	18	10	3	YES	YES	NO	NO
CNVR_2601	11	92704825	92706747	1923	DEL	3	42	13	0	9	4	6	4	3	3	YES	YES	NO	NO
CNVR_2603	11	93076651	93077531	881	DEL	4	91	8	1	23	25	17	10	4	3	YES	YES	NO	NO
CNVR_2608	11	93425078	93425760	683	DEL	2	18	2	0	1	9	1	2	3	0	YES	YES	NO	NO
CNVR_2613	11	93591390	93592764	1375	DEL	3	83	23	1	18	11	12	14	1	3	YES	YES	NO	NO
CNVR_2614	11	93613534	93614238	705	DEL	3	20	6	0	2	2	5	4	1	0	YES	YES	NO	NO
CNVR_2616	11	93826751	93840300	13550	DEL	4	50	17	0	15	2	6	4	5	1	YES	YES	NO	NO
CNVR_2622	11	95522579	95523600	1022	DEL	4	42	8	0	14	0	10	6	1	3	YES	YES	NO	NO
CNVR_2626	11	96611618	96612939	1322	DEL	4	153	25	1	25	41	24	19	15	3	YES	YES	NO	NO
CNVR_2631	11	99359900	99363139	3240	DEL	2	62	18	0	14	8	14	6	0	2	YES	YES	NO	NO
CNVR_2634	11	99970225	99971509	1285	DEL	4	83	19	0	15	14	18	14	2	1	YES	YES	NO	NO
CNVR_2636	11	100036831	100037532	702	DEL	3	4	0	0	2	0	0	2	0	0	YES	YES	NO	NO
CNVR_2644	11	102176026	102177308	1283	DEL	3	6	0	0	1	0	1	4	0	0	YES	YES	NO	NO
CNVR_2645	11	102475061	102476500	1440	DEL	4	71	23	0	9	17	16	4	0	2	YES	YES	NO	NO
CNVR_2646	11	102539853	102540690	838	DEL	3	94	21	0	21	13	18	11	7	3	YES	YES	NO	NO
CNVR_2651	11	103145507	103146527	1021	DEL	3	73	12	0	19	11	14	11	3	3	YES	YES	NO	NO
CNVR_2655	11	104235753	104237512	1760	DEL	3	25	10	0	2	7	0	4	0	2	YES	YES	NO	NO
CNVR_2656	11	104265843	104266831	989	DEL	3	29	4	0	4	0	15	5	0	1	YES	YES	NO	NO
CNVR_2662	11	104844734	104846337	1604	DEL	3	66	15	0	22	4	14	5	3	3	YES	YES	NO	NO
CNVR_2666	11	106134704	106150500	15797	DEL	3	48	13	0	16	3	8	5	0	3	YES	YES	NO	NO
CNVR_2671	11	107284776	107288987	4212	DEL	3	98	3	3	0	41	13	21	17	0	YES	YES	NO	NO
CNVR_2672	11	107284001	107311000	27000	DUP	2	73	21	0	21	6	18	5	0	2	YES	YES	NO	NO
CNVR_2676	11	107300439	107309149	8711	CNV	3	118	6	3	5	41	16	25	21	1	YES	YES	NO	NO
CNVR_2677	12	174127	176245	2119	DEL	3	31	6	0	12	2	4	5	1	1	YES	YES	NO	NO
CNVR_2680	12	543691	544832	1142	DEL	4	133	25	0	25	29	23	17	11	3	YES	YES	NO	NO
CNVR_2681	12	676123	677056	934	DEL	3	8	1	0	2	1	0	2	1	1	YES	YES	NO	NO
CNVR_2682	12	679720	680422	703	DEL	3	28	6	0	6	5	3	3	3	2	YES	YES	NO	NO
CNVR_2685	12	931649	932706	1058	DEL	3	92	23	0	24	11	19	9	3	3	YES	YES	NO	NO
CNVR_2686	12	935101	947100	12000	DEL	4	82	13	1	11	20	11	9	16	1	YES	YES	NO	NO
CNVR_2688	12	1028700	1035250	6551	DEL	3	17	2	0	3	4	0	7	0	1	YES	YES	NO	NO
CNVR_2692	12	1173021	1175747	2727	DEL	3	13	0	0	4	4	2	2	0	1	YES	YES	NO	NO
CNVR_2700	12	1379090	1394750	15661	DEL	2	78	15	0	22	12	11	13	2	3	YES	YES	NO	NO
CNVR_2701	12	1381336	1382301	966	DEL	3	113	18	0	25	22	21	15	9	3	YES	YES	NO	NO
CNVR_2703	12	1411930	1413175	1246	DEL	4	113	21	0	24	29	19	14	4	2	YES	YES	NO	NO
CNVR_2706	12	1508678	1510506	1829	DEL	3	55	17	0	17	1	11	6	0	3	YES	YES	NO	NO
CNVR_2707	12	1662983	1666125	3143	DEL	4	53	12	0	9	15	3	12	0	2	YES	YES	NO	NO
CNVR_2709	12	1782366	1783879	1514	DEL	4	35	15	0	4	3	6	6	1	0	YES	YES	NO	NO
CNVR_2711	12	1852001	1853408	1408	DEL	3	79	20	0	21	12	10	12	2	2	YES	YES	NO	NO
CNVR_2718	12	2012577	2013846	1270	DEL	3	23	6	0	3	3	3	5	1	2	YES	YES	NO	NO
CNVR_2725	12	2865300	2866006	707	DEL	2	17	3	0	1	4	4	4	1	0	YES	YES	NO	NO
CNVR_2731	12	3087701	3090822	3122	DEL	3	122	24	0	25	26	20	17	7	3	YES	YES	NO	NO
CNVR_2733	12	3261251	3263400	2150	DEL	4	6	2	0	0	0	1	3	0	0	YES	YES	NO	NO
CNVR_2737	12	3410099	3411524	1426	DEL	3	59	10	0	16	9	12	8	1	3	YES	YES	NO	NO
CNVR_2740	12	3808001	3811750	3750	DEL	3	107	24	0	25	18	19	11	7	3	YES	YES	NO	NO
CNVR_2742	12	3939403	3941784	2382	DEL	4	70	12	0	11	18	10	10	8	1	YES	YES	NO	NO
CNVR_2744	12	4034501	4036800	2300	DEL	3	52	17	0	7	7	11	9	0	1	YES	YES	NO	NO
CNVR_2749	12	4469457	4472914	3458	DEL	3	93	21	0	16	21	14	11	8	2	YES	YES	NO	NO
CNVR_2754	12	4863727	4865442	1716	DEL	4	128	25	0	18	32	22	17	11	3	YES	YES	NO	NO
CNVR_2758	12	5066239	5067643	1405	DEL	3	72	20	0	13	9	13	11	4	2	YES	YES	NO	NO
CNVR_2763	12	5402085	5404408	2324	DEL	3	138	23	0	24	37	19	18	14	3	YES	YES	NO	NO
CNVR_2768	12	5938121	5939632	1512	DEL	4	76	19	0	20	10	15	5	4	3	YES	YES	NO	NO
CNVR_2777	12	6323501	6325317	1817	DEL	2	6	0	0	0	2	0	4	0	0	YES	YES	NO	NO
CNVR_2779	12	6583751	6595250	11500	DEL	3	112	24	0	25	21	19	14	6	3	YES	YES	NO	NO
CNVR_2780	12	6620290	6623000	2711	DEL	4	87	13	0	21	22	12	12	4	3	YES	YES	NO	NO
CNVR_2781	12	6635871	6636349	479	DEL	2	7	0	0	0	1	1	4	1	0	YES	YES	NO	NO
CNVR_2784	12	6825385	6826657	1273	DEL	4	59	12	0	19	5	13	8	1	1	YES	YES	NO	NO
CNVR_2786	12	7234022	7235119	1098	DEL	3	36	8	0	6	0	10	12	0	0	YES	YES	NO	NO
CNVR_2788	12	7262473	7262891	419	DEL	2	16	0	0	2	4	0	7	3	0	YES	YES	NO	NO
CNVR_2789	12	7265333	7267924	2592	DEL	4	100	15	0	23	22	14	14	9	3	YES	YES	NO	NO
CNVR_2795	12	7551236	7554500	3265	DEL	3	126	22	1	19	33	21	17	11	2	YES	YES	NO	NO
CNVR_2797	12	7747908	7749188	1281	DEL	2	14	4	0	4	0	2	3	0	1	YES	YES	NO	NO
CNVR_2800	12	7830890	7832500	1611	DEL	3	43	17	0	2	9	4	7	2	2	YES	YES	NO	NO
CNVR_2801	12	8205610	8207500	1891	DEL	3	45	9	0	3	7	11	10	2	3	YES	YES	NO	NO
CNVR_2811	12	9083678	9085067	1390	DEL	4	46	10	1	8	7	9	8	2	1	YES	YES	NO	NO
CNVR_2813	12	9937200	9938296	1097	DEL	3	123	23	0	18	31	22	18	9	2	YES	YES	NO	NO
CNVR_2815	12	10765865	10840833	74969	DEL	3	51	13	0	11	9	4	10	4	0	YES	YES	NO	NO
CNVR_2824	12	11829251	11833381	4131	DEL	3	112	18	1	14	33	22	17	6	1	YES	YES	NO	NO
CNVR_2825	12	11875001	11881000	6000	DEL	3	100	15	1	14	31	14	14	10	1	YES	YES	NO	NO
CNVR_2826	12	11900233	11900844	612	DEL	3	18	4	0	0	5	5	4	0	0	YES	YES	NO	NO
CNVR_2829	12	11997001	11998288	1288	DEL	3	64	16	0	19	4	14	9	0	2	YES	YES	NO	NO
CNVR_2836	12	12938559	12939398	840	DEL	3	45	6	0	8	17	3	2	6	3	YES	YES	NO	NO
CNVR_2843	12	14768434	14769234	801	DEL	2	12	4	0	5	0	1	2	0	0	YES	YES	NO	NO
CNVR_2844	12	14768618	14769157	540	DEL	2	13	2	0	2	2	1	4	1	1	YES	YES	NO	NO
CNVR_2846	12	15309552	15311016	1465	DEL	4	15	3	0	0	4	6	2	0	0	YES	YES	NO	NO
CNVR_2849	12	15844798	15845719	922	DEL	3	66	14	0	16	11	8	8	7	2	YES	YES	NO	NO
CNVR_2858	12	16484963	16486781	1819	DEL	3	6	2	0	1	0	0	3	0	0	YES	YES	NO	NO
CNVR_2867	12	17305715	17338790	33076	DEL	2	49	13	0	13	2	12	6	1	2	YES	YES	NO	NO
CNVR_2876	12	18758227	18758980	754	DEL	3	122	22	2	22	32	19	9	13	3	YES	YES	NO	NO
CNVR_2883	12	21371701	21372362	662	DEL	3	33	3	0	9	2	8	5	3	3	YES	YES	NO	NO
CNVR_2891	12	22906751	22975250	68500	DEL	4	6	0	0	0	0	0	6	0	0	YES	YES	NO	NO
CNVR_2893	12	23001001	23010000	9000	DEL	4	17	1	1	4	0	2	3	4	2	YES	YES	NO	NO
CNVR_2898	12	24153939	24155455	1517	DEL	3	133	23	0	23	30	21	19	14	3	YES	YES	NO	NO
CNVR_2899	12	24344001	24346938	2938	DEL	3	59	2	0	12	14	8	15	7	1	YES	YES	NO	NO
CNVR_2919	12	31191675	31195000	3326	DEL	3	108	20	2	24	30	13	10	7	2	YES	YES	NO	NO
CNVR_2921	12	31253430	31255552	2123	DEL	3	65	18	0	21	5	14	4	0	3	YES	YES	NO	NO
CNVR_2930	12	32664605	32665502	898	DEL	2	16	4	0	1	3	3	3	1	1	YES	YES	NO	NO
CNVR_2932	12	33042804	33043629	826	DEL	3	23	6	0	9	0	2	4	0	2	YES	YES	NO	NO
CNVR_2934	12	33566667	33569324	2658	DEL	3	9	2	0	1	0	2	4	0	0	YES	YES	NO	NO
CNVR_2935	12	33664964	33666750	1787	DEL	4	13	0	1	0	3	1	8	0	0	YES	YES	NO	NO
CNVR_2944	12	35107251	35108126	876	DEL	4	22	5	0	6	3	0	8	0	0	YES	YES	NO	NO
CNVR_2945	12	35649846	35650690	845	DEL	3	107	22	0	22	22	20	16	2	3	YES	YES	NO	NO
CNVR_2951	12	37365111	37371300	6190	DEL	3	76	19	0	16	14	17	6	3	1	YES	YES	NO	NO
CNVR_2958	12	37715991	37716678	688	DEL	3	54	9	0	8	13	12	7	3	2	YES	YES	NO	NO
CNVR_2961	12	37828970	37835750	6781	DEL	3	152	24	1	25	42	23	21	13	3	YES	YES	NO	NO
CNVR_2963	12	37894987	37896891	1905	DEL	3	6	0	0	1	0	0	3	1	1	YES	YES	NO	NO
CNVR_2965	12	38305378	38305818	441	DEL	3	16	2	0	1	1	5	5	1	1	YES	YES	NO	NO
CNVR_2972	12	39033893	39034835	943	DEL	4	86	14	0	22	16	19	6	6	3	YES	YES	NO	NO
CNVR_2973	12	39241592	39243387	1796	DEL	4	32	5	1	3	12	5	3	2	1	YES	YES	NO	NO
CNVR_2981	12	40846684	40847942	1259	DEL	4	107	19	1	24	23	19	18	2	1	YES	YES	NO	NO
CNVR_2982	12	40933086	40933940	855	DEL	3	155	24	1	25	40	24	22	16	3	YES	YES	NO	NO
CNVR_2990	12	41744499	41748250	3752	DEL	3	45	17	0	12	1	9	5	0	1	YES	YES	NO	NO
CNVR_2994	12	41981440	41983182	1743	DEL	3	157	25	1	25	44	25	20	14	3	YES	YES	NO	NO
CNVR_2997	12	42482240	42485840	3601	DEL	3	27	7	0	0	7	6	6	1	0	YES	YES	NO	NO
CNVR_3001	12	42942208	43648932	706725	CNV	3	45	2	1	4	20	3	10	4	1	YES	YES	NO	NO
CNVR_3003	12	43055001	43057137	2137	DEL	3	144	23	2	25	34	25	23	9	3	YES	YES	NO	NO
CNVR_3006	12	43659127	43660500	1374	DEL	4	134	24	0	25	35	24	17	6	3	YES	YES	NO	NO
CNVR_3012	12	44394798	44396171	1374	DEL	4	99	22	0	10	23	19	12	10	3	YES	YES	NO	NO
CNVR_3017	12	44633367	44634304	938	DEL	3	72	12	1	16	9	10	14	7	3	YES	YES	NO	NO
CNVR_3028	12	46112251	46113386	1136	DEL	3	20	4	0	5	0	6	3	0	2	YES	YES	NO	NO
CNVR_3031	12	46477674	46478328	655	DEL	3	70	14	0	10	14	15	9	6	2	YES	YES	NO	NO
CNVR_3041	12	49610934	49612138	1205	DEL	2	7	2	0	0	4	1	0	0	0	YES	YES	NO	NO
CNVR_3043	12	49638630	49640750	2121	DEL	3	115	14	1	23	23	20	17	14	3	YES	YES	NO	NO
CNVR_3044	12	49663454	49664214	761	DEL	3	74	8	1	13	13	17	10	9	3	YES	YES	NO	NO
CNVR_3046	12	49882227	49882936	710	DEL	2	12	0	0	5	0	3	3	0	1	YES	YES	NO	NO
CNVR_3053	12	50589909	50591299	1391	DEL	3	29	8	0	4	0	11	4	2	0	YES	YES	NO	NO
CNVR_3054	12	50625219	50628900	3682	DEL	4	31	8	0	1	1	12	7	1	1	YES	YES	NO	NO
CNVR_3055	12	50671657	50672764	1108	DEL	3	82	16	0	21	10	18	8	6	3	YES	YES	NO	NO
CNVR_3060	12	51127082	51127564	483	DEL	2	13	0	0	3	0	3	5	1	1	YES	YES	NO	NO
CNVR_3065	12	51935020	51939517	4498	DUP	2	36	15	0	5	1	8	5	0	2	YES	YES	NO	NO
CNVR_3066	12	51937223	51939564	2342	DEL	2	25	4	0	2	5	3	7	4	0	YES	YES	NO	NO
CNVR_3068	12	52090094	52091100	1007	DEL	4	19	4	0	5	3	2	4	0	1	YES	YES	NO	NO
CNVR_3074	12	53489212	53720607	231396	CNV	3	37	4	0	7	7	6	7	5	1	YES	YES	NO	NO
CNVR_3075	12	53716501	53720529	4029	DEL	3	48	11	0	18	4	6	5	1	3	YES	YES	NO	NO
CNVR_3077	12	54576720	54578228	1509	DEL	3	14	0	0	6	0	2	2	1	3	YES	YES	NO	NO
CNVR_3081	12	55401251	55407750	6500	DEL	4	90	20	2	10	20	16	18	1	3	YES	YES	NO	NO
CNVR_3086	12	56538003	56538922	920	DEL	3	86	19	1	22	12	15	9	5	3	YES	YES	NO	NO
CNVR_3099	12	58432709	58437797	5089	DEL	3	76	12	1	20	14	8	13	6	2	YES	YES	NO	NO
CNVR_3107	12	58706108	58708074	1967	DEL	3	116	21	1	24	33	18	8	8	3	YES	YES	NO	NO
CNVR_3116	12	59471751	59472841	1091	DEL	3	92	19	1	13	22	18	9	7	3	YES	YES	NO	NO
CNVR_3120	12	59717723	59719182	1460	DEL	2	95	23	0	20	13	20	12	4	3	YES	YES	NO	NO
CNVR_3121	12	59845673	59846418	746	DEL	3	72	13	1	10	13	19	8	6	2	YES	YES	NO	NO
CNVR_3124	12	60035059	60036357	1299	DEL	3	77	23	0	21	3	17	9	1	3	YES	YES	NO	NO
CNVR_3132	12	60435619	60436596	978	DEL	3	72	15	0	18	5	16	13	2	3	YES	YES	NO	NO
CNVR_3133	12	60638714	60640239	1526	DEL	3	79	15	0	20	11	14	9	7	3	YES	YES	NO	NO
CNVR_3135	12	60704251	60707250	3000	DEL	3	124	25	1	24	20	23	20	8	3	YES	YES	NO	NO
CNVR_3136	12	60823681	60824565	885	DEL	3	6	0	0	2	0	0	4	0	0	YES	YES	NO	NO
CNVR_3138	12	61174243	64062659	2888417	DEL	2	6	1	0	0	0	1	4	0	0	YES	YES	NO	NO
CNVR_3144	12	61400925	61402500	1576	DEL	4	85	19	0	12	14	18	11	8	3	YES	YES	NO	NO
CNVR_3146	12	61759208	61759986	779	DEL	3	69	15	0	18	19	8	3	4	2	YES	YES	NO	NO
CNVR_3150	12	62192934	62193784	851	DEL	3	19	6	0	0	1	6	5	1	0	YES	YES	NO	NO
CNVR_3151	12	62257654	62258733	1080	DEL	3	27	8	0	0	10	2	4	2	1	YES	YES	NO	NO
CNVR_3152	12	62467795	62468867	1073	DEL	2	9	2	0	0	2	1	4	0	0	YES	YES	NO	NO
CNVR_3155	12	62860681	63671944	811264	DEL	2	79	18	0	21	12	17	8	1	2	YES	YES	NO	NO
CNVR_3158	12	63171892	63175064	3173	DEL	3	51	8	0	14	7	8	10	2	2	YES	YES	NO	NO
CNVR_3169	12	64159235	64160103	869	DEL	3	22	1	0	3	1	6	9	2	0	YES	YES	NO	NO
CNVR_3173	12	64227837	64230392	2556	DEL	3	19	2	0	5	2	5	3	0	2	YES	YES	NO	NO
CNVR_3175	12	64572117	64573659	1543	DEL	4	61	15	0	14	8	14	5	4	1	YES	YES	NO	NO
CNVR_3181	12	64647489	64649955	2467	DEL	2	41	11	0	9	1	10	8	1	1	YES	YES	NO	NO
CNVR_3183	12	64705109	64706657	1549	DEL	3	129	20	2	22	25	16	25	16	3	YES	YES	NO	NO
CNVR_3187	12	65711424	65712424	1001	DEL	3	101	17	0	13	21	23	15	9	3	YES	YES	NO	NO
CNVR_3191	12	65885279	65886338	1060	DEL	3	95	18	0	20	19	16	13	6	3	YES	YES	NO	NO
CNVR_3201	12	67010591	67011160	570	DEL	3	56	6	0	9	12	10	9	7	3	YES	YES	NO	NO
CNVR_3208	12	67532751	67580250	47500	DEL	4	20	0	1	6	12	0	0	1	0	NO	NO	YES	NO
CNVR_3212	12	68222223	68222947	725	DEL	3	6	0	0	1	0	0	5	0	0	YES	YES	NO	NO
CNVR_3213	12	68372251	68373922	1672	DEL	4	99	21	0	20	16	18	14	7	3	YES	YES	NO	NO
CNVR_3216	12	68567001	68568272	1272	DEL	3	66	12	1	15	10	10	14	4	0	YES	YES	NO	NO
CNVR_3218	12	69144516	69147111	2596	DEL	3	5	0	0	0	0	0	5	0	0	YES	YES	NO	NO
CNVR_3219	12	69338455	69352892	14438	DEL	3	59	15	0	14	8	10	10	1	1	YES	YES	NO	NO
CNVR_3220	12	69507749	69511093	3345	DEL	3	5	0	0	0	0	1	4	0	0	YES	YES	NO	NO
CNVR_3228	12	70316267	70326144	9878	DEL	3	66	18	0	14	10	5	10	8	1	YES	YES	NO	NO
CNVR_3235	12	70597187	70611133	13947	DEL	3	39	8	0	9	6	8	4	1	3	YES	YES	NO	NO
CNVR_3236	12	70616248	70617443	1196	DEL	2	11	1	0	2	0	0	4	3	1	YES	YES	NO	NO
CNVR_3239	12	70662379	70664005	1627	DEL	4	40	9	0	10	7	4	8	2	0	YES	YES	NO	NO
CNVR_3240	12	70701119	76652818	5951700	DEL	3	129	19	3	24	26	24	19	12	2	YES	YES	NO	YES
CNVR_3249	12	71290015	71290991	977	DEL	3	51	7	0	9	7	13	9	4	2	YES	YES	NO	NO
CNVR_3252	12	71394890	74775070	3380181	CNV	3	55	7	3	3	13	10	8	11	0	YES	YES	NO	YES
CNVR_3255	12	71593259	71595206	1948	DEL	2	13	3	0	6	0	1	2	0	1	YES	YES	NO	NO
CNVR_3256	12	71598333	73590748	1992416	DEL	3	36	9	0	8	3	6	2	5	3	YES	NO	YES	YES
CNVR_3258	12	71615032	71616462	1431	DEL	3	29	8	0	6	1	5	6	2	1	YES	YES	NO	NO
CNVR_3261	12	71782001	71800500	18500	DEL	3	4	0	0	2	0	0	2	0	0	YES	YES	NO	NO
CNVR_3271	12	72125033	72125841	809	DEL	3	13	2	0	3	0	4	4	0	0	YES	YES	NO	NO
CNVR_3276	12	72205177	72247000	41824	DEL	4	29	2	0	3	7	12	5	0	0	YES	YES	NO	NO
CNVR_3280	12	72399731	74811010	2411280	DEL	3	34	5	1	2	6	6	7	5	2	YES	YES	NO	YES
CNVR_3281	12	72467405	72468750	1346	DEL	3	43	7	0	9	4	11	11	1	0	YES	YES	NO	NO
CNVR_3289	12	72925853	72940500	14648	CNV	2	11	0	0	0	6	2	1	2	0	YES	YES	NO	NO
CNVR_3296	12	73086913	76740539	3653627	CNV	3	107	14	3	18	26	20	14	9	3	YES	YES	NO	YES
CNVR_3298	12	73087927	75948680	2860754	CNV	3	96	15	1	14	20	17	16	10	3	YES	YES	NO	YES
CNVR_3299	12	73109488	74824053	1714566	CNV	3	72	10	2	8	18	10	13	8	3	YES	YES	NO	NO
CNVR_3301	12	73109488	74828228	1718741	CNV	3	64	9	1	8	16	9	11	8	2	YES	YES	NO	YES
CNVR_3302	12	73117192	76740539	3623348	DEL	2	70	9	3	11	17	12	10	6	2	YES	YES	NO	YES
CNVR_3305	12	73217010	73218313	1304	DEL	3	109	22	2	16	19	23	18	6	3	YES	YES	NO	NO
CNVR_3309	12	73398539	73399353	815	DEL	2	38	3	1	3	11	4	9	7	0	YES	YES	NO	NO
CNVR_3312	12	73088713	76740539	3651827	DEL	2	59	4	3	11	16	10	7	6	2	YES	YES	NO	YES
CNVR_3313	12	73424868	73426200	1333	DEL	4	42	16	0	12	1	9	4	0	0	YES	YES	NO	NO
CNVR_3315	12	73451950	73456500	4551	DEL	3	20	4	0	1	1	6	5	1	2	YES	YES	NO	NO
CNVR_3322	12	73631815	76281394	2649580	CNV	3	51	5	1	2	15	6	12	8	2	YES	YES	NO	YES
CNVR_3323	12	73682748	74824256	1141509	DEL	3	15	1	1	0	2	5	6	0	0	YES	YES	NO	NO
CNVR_3328	12	73863134	73941169	78036	DEL	3	33	4	0	4	12	4	4	3	2	YES	YES	NO	NO
CNVR_3331	12	73874284	75215075	1340792	CNV	3	29	0	1	0	10	5	5	8	0	YES	YES	NO	YES
CNVR_3332	12	73950874	74050050	99177	CNV	3	24	2	1	2	9	1	4	3	2	YES	YES	NO	YES
CNVR_3352	12	74369878	74699031	329154	DEL	3	25	1	1	2	9	3	4	4	1	YES	YES	NO	NO
CNVR_3354	12	74520398	76125380	1604983	DEL	2	8	0	0	0	1	1	4	2	0	YES	YES	NO	YES
CNVR_3356	12	74589681	74591250	1570	DEL	4	57	6	1	11	15	11	8	2	3	YES	YES	NO	NO
CNVR_3357	12	74593001	74606750	13750	DEL	3	77	14	1	12	16	11	15	5	3	YES	YES	NO	NO
CNVR_3371	12	75160657	75162198	1542	DEL	4	59	15	0	9	8	10	9	5	3	YES	YES	NO	NO
CNVR_3374	12	75249210	75250162	953	DEL	4	140	25	1	25	23	27	23	13	3	YES	YES	NO	NO
CNVR_3376	12	75291329	75292103	775	DEL	2	46	6	0	6	10	8	13	2	1	YES	YES	NO	NO
CNVR_3377	12	75295333	75296202	870	DEL	4	108	22	1	24	21	15	14	8	3	YES	YES	NO	NO
CNVR_3385	12	75527494	75555391	27898	DEL	3	29	6	0	4	3	7	8	1	0	YES	YES	NO	NO
CNVR_3388	12	75625094	75626099	1006	DEL	3	12	0	0	6	0	1	4	0	1	YES	YES	NO	NO
CNVR_3390	12	75646001	75647400	1400	DEL	3	5	0	0	0	0	1	4	0	0	YES	YES	NO	NO
CNVR_3392	12	75699260	76652314	953055	CNV	3	98	10	1	8	33	17	18	9	2	YES	YES	NO	NO
CNVR_3396	12	75788614	76661521	872908	DEL	3	121	21	1	18	30	24	17	9	1	YES	YES	NO	YES
CNVR_3407	12	76178649	76539170	360522	CNV	2	13	2	0	0	0	5	3	3	0	YES	YES	NO	YES
CNVR_3413	12	76224297	76225925	1629	DEL	4	84	16	1	15	10	19	14	6	3	YES	YES	NO	NO
CNVR_3419	12	76307685	76315437	7753	DEL	3	10	1	0	4	1	0	3	0	1	YES	YES	NO	NO
CNVR_3420	12	76333602	76723627	390026	DEL	3	30	4	1	1	7	6	4	6	1	YES	YES	NO	NO
CNVR_3425	12	76440039	76562006	121968	DEL	3	24	6	0	5	2	4	1	5	1	YES	YES	NO	YES
CNVR_3426	12	76481434	76575972	94539	DEL	2	19	4	0	3	2	3	7	0	0	YES	YES	NO	NO
CNVR_3430	12	76632682	76634118	1437	DEL	3	82	11	1	11	20	17	11	10	1	YES	YES	NO	NO
CNVR_3434	12	76963847	76965669	1823	DEL	3	73	15	0	16	8	18	10	4	2	YES	YES	NO	NO
CNVR_3436	12	77107029	77109328	2300	DEL	3	8	0	0	0	0	5	3	0	0	YES	YES	NO	NO
CNVR_3437	12	77251243	77251839	597	DEL	2	3	0	0	0	0	0	3	0	0	YES	YES	NO	NO
CNVR_3442	12	77663969	77664930	962	DEL	3	134	25	1	25	29	22	18	11	3	YES	YES	NO	NO
CNVR_3443	12	77784680	77785333	654	DEL	3	13	1	1	1	2	1	4	2	1	YES	YES	NO	NO
CNVR_3445	12	77784770	77785209	440	DEL	3	6	1	0	0	1	0	3	0	1	YES	YES	NO	NO
CNVR_3446	12	77988102	77989085	984	DEL	3	48	8	0	12	9	10	3	5	1	YES	YES	NO	NO
CNVR_3447	12	78007568	78008154	587	DEL	3	30	5	0	4	8	6	5	1	1	YES	YES	NO	NO
CNVR_3450	12	78435098	78435957	860	DEL	3	64	6	1	14	11	10	13	7	2	YES	YES	NO	NO
CNVR_3451	12	78457728	78459326	1599	DEL	3	10	0	0	0	6	0	3	1	0	YES	YES	NO	NO
CNVR_3463	12	80545848	80546575	728	DEL	2	18	4	0	4	4	2	3	1	0	YES	YES	NO	NO
CNVR_3474	12	82092445	82093547	1103	DEL	3	6	1	0	0	1	0	3	0	1	YES	YES	NO	NO
CNVR_3476	12	82264343	82266300	1958	DEL	3	59	13	1	11	15	10	2	6	1	YES	YES	NO	NO
CNVR_3478	12	82822768	82823115	348	DEL	2	9	0	0	0	4	0	4	1	0	YES	YES	NO	NO
CNVR_3480	12	83058262	83058756	495	DEL	2	9	0	0	0	5	0	3	1	0	YES	YES	NO	NO
CNVR_3490	12	84214801	84222600	7800	DEL	4	44	11	0	5	8	13	6	0	1	YES	YES	NO	NO
CNVR_3492	12	84688955	84689842	888	DEL	3	22	1	0	1	0	12	8	0	0	YES	YES	NO	NO
CNVR_3498	12	85460442	85461545	1104	DEL	3	90	19	0	17	14	18	14	6	2	YES	YES	NO	NO
CNVR_3501	12	86718766	86719425	660	DEL	3	4	0	0	0	1	0	2	1	0	YES	YES	NO	NO
CNVR_3518	12	88067359	88068317	959	DEL	3	70	14	0	15	15	13	7	3	3	YES	YES	NO	NO
CNVR_3528	12	90123301	90124911	1611	DEL	3	86	20	1	24	10	16	10	2	3	YES	YES	NO	NO
CNVR_3532	13	1262	886796	885535	CNV	3	62	6	1	5	21	7	14	7	1	YES	YES	NO	NO
CNVR_3537	13	707814	709501	1688	DEL	4	32	6	0	6	7	5	5	2	1	YES	YES	NO	NO
CNVR_3538	13	723298	724151	854	DEL	2	15	4	0	4	0	4	2	0	1	YES	YES	NO	NO
CNVR_3543	13	877880	879149	1270	DEL	2	31	3	0	9	6	6	5	2	0	YES	YES	NO	NO
CNVR_3556	13	1496372	1497254	883	DEL	3	127	24	0	25	27	22	19	7	3	YES	YES	NO	NO
CNVR_3558	13	1853642	1854412	771	DEL	3	22	3	0	3	5	4	4	2	1	YES	YES	NO	NO
CNVR_3560	13	2104116	2105116	1001	DEL	3	16	9	0	0	1	4	0	2	0	YES	YES	NO	NO
CNVR_3563	13	2805212	2806802	1591	DEL	3	156	24	2	24	40	25	20	18	3	YES	YES	NO	NO
CNVR_3567	13	3087939	3093500	5562	DEL	3	115	16	0	19	30	21	15	11	3	YES	YES	NO	NO
CNVR_3568	13	3105056	3105645	590	DEL	2	3	0	0	0	1	0	2	0	0	YES	YES	NO	NO
CNVR_3582	13	5161460	5162737	1278	DEL	4	107	18	0	23	28	17	16	3	2	YES	YES	NO	NO
CNVR_3583	13	5185020	5186827	1808	DEL	3	46	17	0	10	1	9	8	0	1	YES	YES	NO	NO
CNVR_3587	13	5335317	5576250	240934	DEL	3	78	18	0	21	10	16	7	3	3	YES	YES	NO	NO
CNVR_3591	13	5819175	5819921	747	DEL	3	96	20	0	23	11	23	13	4	2	YES	YES	NO	NO
CNVR_3595	13	6219861	6221345	1485	DEL	3	130	21	1	23	29	20	20	13	3	YES	YES	NO	NO
CNVR_3597	13	6368751	6377500	8750	DEL	3	63	13	0	14	13	9	9	2	3	YES	YES	NO	NO
CNVR_3605	13	7901094	7902010	917	DEL	3	102	21	0	16	24	22	10	6	3	YES	YES	NO	NO
CNVR_3606	13	7971478	7972864	1387	DEL	3	137	24	1	23	36	22	14	14	3	YES	YES	NO	NO
CNVR_3614	13	8819000	8820406	1407	DEL	3	37	6	0	7	5	5	9	3	2	YES	YES	NO	NO
CNVR_3616	13	9057769	9061403	3635	DEL	3	9	1	0	4	0	1	2	0	1	YES	YES	NO	NO
CNVR_3619	13	9730346	9731179	834	DEL	4	66	9	0	12	22	12	7	3	1	YES	YES	NO	NO
CNVR_3620	13	9828274	9829269	996	DEL	3	7	0	0	1	0	3	2	1	0	YES	YES	NO	NO
CNVR_3624	13	9900640	9909240	8601	DEL	3	9	1	0	4	0	1	2	0	1	YES	YES	NO	NO
CNVR_3625	13	10089749	10090553	805	DEL	3	5	0	0	1	0	0	3	0	1	YES	YES	NO	NO
CNVR_3626	13	10173602	10175196	1595	DEL	4	69	17	1	11	13	10	13	3	1	YES	YES	NO	NO
CNVR_3630	13	10446720	10448169	1450	DEL	3	14	5	0	4	0	0	2	2	1	YES	YES	NO	NO
CNVR_3633	13	10812199	11297453	485255	CNV	3	94	10	1	15	26	15	11	13	3	YES	YES	NO	YES
CNVR_3634	13	10812249	10815137	2889	DEL	2	17	2	0	3	1	2	5	2	2	YES	YES	NO	NO
CNVR_3635	13	10960139	17846162	6886024	DEL	2	58	3	1	0	22	8	13	11	0	YES	YES	NO	NO
CNVR_3637	13	11035301	11036762	1462	DEL	2	92	22	0	20	21	18	6	3	2	YES	YES	NO	NO
CNVR_3645	13	11190158	11297461	107304	CNV	3	34	1	2	0	15	3	5	8	0	YES	YES	NO	NO
CNVR_3648	13	11284400	11287771	3372	DEL	3	2	0	0	0	0	0	2	0	0	YES	YES	NO	NO
CNVR_3651	13	11382411	11384213	1803	DEL	3	128	18	1	22	40	23	8	14	2	YES	YES	NO	NO
CNVR_3652	13	11464919	11466472	1554	DEL	2	5	0	0	2	0	0	2	0	1	YES	YES	NO	NO
CNVR_3663	13	12909260	12909983	724	DEL	2	12	1	0	3	4	3	0	1	0	YES	YES	NO	NO
CNVR_3676	13	14831243	14831847	605	DEL	2	20	1	1	1	7	2	0	7	1	YES	YES	NO	NO
CNVR_3684	13	16708001	16716250	8250	DEL	3	113	12	0	24	23	20	16	15	3	YES	YES	NO	NO
CNVR_3690	13	18710592	18711389	798	DEL	2	38	11	0	13	1	6	5	1	1	YES	YES	NO	NO
CNVR_3694	13	19427751	19439250	11500	DEL	4	3	0	0	0	0	0	3	0	0	YES	YES	NO	NO
CNVR_3699	13	20741234	20874282	133049	DEL	2	31	9	0	9	2	5	5	0	1	YES	YES	NO	NO
CNVR_3700	13	20837452	20838197	746	DEL	3	40	10	0	9	8	3	7	1	2	YES	YES	NO	NO
CNVR_3704	13	21305685	21306398	714	DEL	3	49	8	0	10	7	16	4	2	2	YES	YES	NO	NO
CNVR_3712	13	22813635	22814393	759	DEL	3	16	8	0	0	0	0	6	2	0	YES	YES	NO	NO
CNVR_3716	13	25455751	25459558	3808	DEL	4	67	11	2	6	12	20	11	3	2	YES	YES	NO	NO
CNVR_3719	13	25916547	25917781	1235	DEL	4	68	21	0	18	4	8	10	5	2	YES	YES	NO	NO
CNVR_3723	13	26096016	26097074	1059	DEL	3	25	4	0	3	8	2	3	3	2	YES	YES	NO	NO
CNVR_3727	13	26399257	26400431	1175	DEL	3	131	22	2	25	31	23	15	10	3	YES	YES	NO	NO
CNVR_3737	13	27868251	27873600	5350	DEL	3	47	13	0	12	4	11	5	0	2	YES	YES	NO	NO
CNVR_3742	13	28679751	28682500	2750	DEL	4	93	23	0	22	17	9	9	11	2	YES	YES	NO	NO
CNVR_3743	13	28830918	28831801	884	DEL	3	53	8	1	8	22	6	4	2	2	YES	YES	NO	NO
CNVR_3745	13	29043722	29044503	782	DEL	3	27	1	0	5	3	5	9	3	1	YES	YES	NO	NO
CNVR_3747	13	29450017	29450786	770	DEL	4	64	21	0	17	10	10	0	3	3	YES	YES	NO	NO
CNVR_3751	13	30903164	30904907	1744	DEL	4	67	11	1	19	11	10	6	8	1	YES	YES	NO	NO
CNVR_3756	13	31587486	31589853	2368	DEL	4	11	2	0	0	2	1	6	0	0	YES	YES	NO	NO
CNVR_3765	13	33893698	33894483	786	DEL	3	80	19	0	16	13	16	7	6	3	YES	YES	NO	NO
CNVR_3767	13	34141349	34209233	67885	DEL	2	89	20	0	18	16	15	10	8	2	YES	YES	NO	NO
CNVR_3779	13	36183477	36184320	844	DEL	3	12	0	0	1	2	1	7	1	0	YES	YES	NO	NO
CNVR_3781	13	36647302	36650973	3672	DEL	3	26	2	0	7	8	2	1	5	1	YES	YES	NO	NO
CNVR_3783	13	36949001	36954000	5000	DEL	3	64	15	1	13	5	9	16	4	1	YES	YES	NO	NO
CNVR_3785	13	37192924	37193788	865	DEL	3	28	6	0	8	3	0	9	2	0	YES	YES	NO	NO
CNVR_3787	13	37759426	37760400	975	DEL	3	14	4	0	4	0	0	5	1	0	YES	YES	NO	NO
CNVR_3793	13	38977710	38979006	1297	DEL	3	100	23	0	24	14	17	12	7	3	YES	YES	NO	NO
CNVR_3795	13	39263397	39307465	44069	DEL	2	31	6	0	7	4	5	8	0	1	YES	YES	NO	NO
CNVR_3798	13	39470251	39473000	2750	DEL	3	79	17	0	13	18	12	13	4	2	YES	YES	NO	NO
CNVR_3800	13	40165251	40212750	47500	DEL	3	30	0	0	0	17	0	10	3	0	YES	YES	NO	NO
CNVR_3805	13	41427501	41448000	20500	DEL	3	20	3	0	6	1	4	4	1	1	YES	YES	NO	NO
CNVR_3809	13	41579982	41582754	2773	DEL	4	15	0	0	6	0	1	7	0	1	YES	YES	NO	NO
CNVR_3810	13	41947001	41949500	2500	DEL	3	7	0	0	0	3	0	4	0	0	YES	YES	NO	NO
CNVR_3824	13	43742415	46499958	2757544	DEL	2	88	22	0	24	12	17	9	1	3	YES	YES	NO	NO
CNVR_3830	13	43918844	43920126	1283	DEL	3	39	14	0	6	12	2	3	1	1	YES	YES	NO	NO
CNVR_3836	13	44256981	44257790	810	DEL	3	46	5	1	18	8	4	9	0	1	YES	YES	NO	NO
CNVR_3848	13	46841828	46843056	1229	DEL	4	87	23	2	24	7	17	10	1	3	YES	YES	NO	NO
CNVR_3852	13	48160923	48162340	1418	DEL	3	120	23	1	24	20	22	24	3	3	YES	YES	NO	NO
CNVR_3853	13	48247344	48248431	1088	DEL	4	20	13	0	2	0	3	2	0	0	YES	YES	NO	NO
CNVR_3856	13	48971251	48972851	1601	DEL	4	22	2	0	4	8	0	7	0	1	YES	YES	NO	NO
CNVR_3859	13	49586521	49587320	800	DEL	3	60	8	0	16	13	11	7	2	3	YES	YES	NO	NO
CNVR_3864	13	50167075	50167783	709	DEL	3	22	4	0	2	2	7	5	1	1	YES	YES	NO	NO
CNVR_3865	13	50345501	50407500	62000	DEL	4	32	0	2	0	17	0	9	4	0	YES	YES	NO	NO
CNVR_3866	13	50359932	50391802	31871	DEL	2	22	4	0	3	4	5	5	1	0	YES	YES	NO	NO
CNVR_3870	13	51041999	51042576	578	DEL	3	64	14	0	5	12	13	9	8	3	YES	YES	NO	NO
CNVR_3872	13	51315291	51315917	627	DEL	2	7	0	1	0	3	0	3	0	0	YES	YES	NO	NO
CNVR_3875	13	52172490	52173898	1409	DEL	3	120	24	2	21	20	22	20	9	2	YES	YES	NO	NO
CNVR_3886	13	55415889	55417197	1309	DEL	4	98	22	0	23	11	21	12	6	3	YES	YES	NO	NO
CNVR_3896	13	56996501	56998642	2142	DEL	4	8	0	0	3	1	0	4	0	0	YES	YES	NO	NO
CNVR_3901	13	59831946	59832765	820	DEL	2	14	2	0	3	2	1	4	1	1	YES	YES	NO	NO
CNVR_3902	13	60148951	60402689	253739	DEL	2	12	0	0	1	0	2	7	2	0	YES	YES	NO	NO
CNVR_3904	13	60307751	60309116	1366	DEL	3	51	6	0	11	1	15	17	1	0	YES	YES	NO	NO
CNVR_3905	13	60515842	60517200	1359	DEL	4	40	13	0	4	2	7	10	2	2	YES	YES	NO	NO
CNVR_3910	13	61596524	61598250	1727	DEL	4	78	12	1	20	14	14	6	8	3	YES	YES	NO	NO
CNVR_3914	13	62912591	62913732	1142	DEL	4	106	18	0	20	27	18	11	10	2	YES	YES	NO	NO
CNVR_3918	13	63224222	63225671	1450	DEL	3	127	17	1	22	32	20	21	12	2	YES	YES	NO	NO
CNVR_3922	13	63324751	63326750	2000	DEL	4	89	22	0	22	12	17	10	4	2	YES	YES	NO	NO
CNVR_3925	13	63534691	63535049	359	DEL	2	2	0	0	0	0	0	2	0	0	YES	YES	NO	NO
CNVR_3935	13	64213001	64220750	7750	DEL	3	139	25	2	24	41	24	20	1	2	YES	YES	NO	NO
CNVR_3939	13	64377001	64383250	6250	DEL	3	99	1	3	0	48	0	27	20	0	YES	YES	NO	NO
CNVR_3944	13	65665263	65665933	671	DEL	3	68	16	0	15	5	19	7	6	0	YES	YES	NO	NO
CNVR_3950	13	67450687	67451815	1129	DEL	3	4	0	0	2	0	0	2	0	0	YES	YES	NO	NO
CNVR_3952	13	67982449	67985296	2848	DEL	4	6	0	0	1	0	0	5	0	0	YES	YES	NO	NO
CNVR_3954	13	68352190	68353000	811	DEL	3	49	6	0	13	9	8	7	4	2	YES	YES	NO	NO
CNVR_3964	13	70594162	70595820	1659	DEL	3	38	6	0	7	13	6	1	3	2	YES	YES	NO	NO
CNVR_3969	13	71754134	71756862	2729	DEL	2	66	16	0	19	5	15	7	1	3	YES	YES	NO	NO
CNVR_3970	13	71756101	71758439	2339	DEL	3	91	24	0	24	13	16	8	3	3	YES	YES	NO	NO
CNVR_3971	13	71778861	71821096	42236	DEL	2	14	3	0	2	2	3	3	0	1	YES	YES	NO	NO
CNVR_3973	13	72375715	72448604	72890	DEL	3	48	16	0	15	2	6	6	0	3	YES	YES	NO	NO
CNVR_3975	13	72598201	72606817	8617	DEL	2	11	5	0	1	0	3	2	0	0	YES	YES	NO	NO
CNVR_3979	13	73994227	73995793	1567	DEL	3	112	22	0	23	27	18	12	7	3	YES	YES	NO	NO
CNVR_3989	13	74495751	74499000	3250	DEL	4	72	9	0	15	19	14	6	7	2	YES	YES	NO	NO
CNVR_4002	13	76301916	76304100	2185	DEL	4	88	21	2	19	16	10	10	9	1	YES	YES	NO	NO
CNVR_4004	13	77085446	77460952	375507	DEL	2	9	2	0	4	0	0	2	0	1	YES	YES	NO	NO
CNVR_4014	13	79533001	79534750	1750	DEL	4	43	14	0	9	1	11	5	1	2	YES	YES	NO	NO
CNVR_4015	13	79963083	79965103	2021	DEL	3	12	7	0	0	0	0	5	0	0	YES	YES	NO	NO
CNVR_4016	13	80195177	80196546	1370	DEL	3	49	8	0	13	9	7	8	4	0	YES	YES	NO	NO
CNVR_4017	13	80212513	80213329	817	DEL	3	25	9	0	1	5	6	2	2	0	YES	YES	NO	NO
CNVR_4023	13	80848911	80850300	1390	DEL	3	24	5	0	6	1	3	7	2	0	YES	YES	NO	NO
CNVR_4026	13	81486957	81488400	1444	DEL	3	142	24	2	25	39	21	20	8	3	YES	YES	NO	NO
CNVR_4034	13	82837501	82840000	2500	DEL	3	22	2	0	8	2	6	4	0	0	YES	YES	NO	NO
CNVR_4042	13	83290623	83292091	1469	DEL	4	122	24	1	23	22	20	18	11	3	YES	YES	NO	NO
CNVR_4045	13	83370392	83370919	528	DEL	2	3	0	0	0	0	1	2	0	0	YES	YES	NO	NO
CNVR_4046	13	83666001	83669262	3262	DEL	4	103	17	1	21	20	17	16	8	3	YES	YES	NO	NO
CNVR_4047	13	83729646	83733000	3355	DEL	4	34	10	0	13	1	2	4	1	3	YES	YES	NO	NO
CNVR_4048	13	83884898	83886435	1538	DEL	3	30	3	0	11	4	6	3	1	2	YES	YES	NO	NO
CNVR_4049	13	84004552	84005663	1112	DEL	2	44	13	0	7	4	12	6	1	1	YES	YES	NO	NO
CNVR_4054	14	2350	480132	477783	CNV	3	52	10	2	4	10	10	11	5	0	YES	YES	NO	YES
CNVR_4055	14	19133	302441	283309	DEL	2	28	5	0	6	7	4	4	1	1	YES	YES	NO	YES
CNVR_4057	14	20227	20789	563	DEL	2	25	6	0	6	2	5	5	1	0	YES	YES	NO	NO
CNVR_4058	14	22954	1365304	1342351	CNV	3	59	4	3	3	25	8	10	6	0	YES	YES	NO	YES
CNVR_4059	14	36192	384798	348607	CNV	2	53	5	3	5	15	10	8	6	1	YES	YES	NO	YES
CNVR_4061	14	58523	1003680	945158	CNV	3	135	17	3	16	36	28	18	14	3	YES	YES	NO	YES
CNVR_4062	14	76592	1003680	927089	CNV	3	162	19	3	19	46	28	26	18	3	YES	YES	NO	YES
CNVR_4067	14	134574	135262	689	DEL	3	70	6	2	6	15	12	15	14	0	YES	YES	NO	NO
CNVR_4070	14	111279	1003680	892402	CNV	3	138	16	3	16	41	22	24	13	3	YES	YES	NO	NO
CNVR_4076	14	266465	454000	187536	DEL	3	84	21	0	24	7	22	7	0	3	YES	YES	NO	YES
CNVR_4077	14	240537	1125790	885254	CNV	3	55	5	1	3	25	4	7	9	1	YES	YES	NO	YES
CNVR_4082	14	363001	379500	16500	DUP	2	12	5	0	3	1	1	2	0	0	YES	YES	NO	NO
CNVR_4083	14	374660	734706	360047	CNV	2	18	0	0	0	4	9	2	3	0	YES	YES	NO	YES
CNVR_4088	14	470417	660748	190332	CNV	3	178	24	3	25	47	27	30	19	3	YES	YES	NO	YES
CNVR_4090	14	492038	583657	91620	DEL	2	8	2	0	1	1	2	2	0	0	YES	YES	NO	NO
CNVR_4093	14	550229	638468	88240	CNV	2	33	7	0	13	1	9	2	0	1	YES	YES	NO	NO
CNVR_4094	14	551868	555383	3516	CNV	2	20	5	0	8	2	1	3	1	0	YES	YES	NO	NO
CNVR_4105	14	569501	635352	65852	CNV	3	88	21	1	23	10	21	9	0	3	YES	YES	NO	NO
CNVR_4107	14	595197	1109654	514458	CNV	2	39	11	0	8	4	3	5	7	1	YES	YES	NO	NO
CNVR_4113	14	791266	847500	56235	CNV	2	6	0	0	2	1	0	2	1	0	YES	YES	NO	NO
CNVR_4115	14	796834	798957	2124	DEL	3	38	1	1	0	16	4	8	8	0	YES	YES	NO	NO
CNVR_4118	14	841725	844682	2958	DEL	3	115	24	3	25	16	27	10	7	3	YES	YES	NO	NO
CNVR_4120	14	847251	1349565	502315	DEL	3	100	2	3	1	42	12	18	22	0	YES	YES	NO	NO
CNVR_4123	14	952643	957190	4548	DEL	2	12	2	0	4	1	0	4	0	1	YES	YES	NO	NO
CNVR_4128	14	1091764	1135624	43861	DEL	2	3	0	0	1	0	0	2	0	0	YES	YES	NO	NO
CNVR_4136	14	2696382	2738579	42198	CNV	2	44	11	0	11	1	8	7	4	2	YES	YES	NO	NO
CNVR_4155	14	5614984	5622456	7473	DEL	3	43	15	0	12	1	7	4	1	3	YES	YES	NO	NO
CNVR_4159	14	6367001	6370299	3299	DEL	3	47	7	0	17	8	5	5	4	1	YES	YES	NO	NO
CNVR_4166	14	6883854	6885316	1463	DEL	3	48	9	0	7	10	13	4	3	2	YES	YES	NO	NO
CNVR_4178	14	10321153	10322158	1006	DEL	3	53	10	1	9	4	12	12	3	2	YES	YES	NO	NO
CNVR_4182	14	11234251	11238250	4000	DEL	3	83	23	0	16	9	19	7	7	2	YES	YES	NO	NO
CNVR_4184	14	11366082	11420250	54169	DEL	2	27	5	0	7	2	3	5	4	1	YES	YES	NO	NO
CNVR_4185	14	11417365	11417733	369	DEL	3	23	1	0	0	9	6	4	3	0	YES	YES	NO	NO
CNVR_4187	14	11860748	11861409	662	DEL	3	51	12	1	1	14	11	11	1	0	YES	YES	NO	NO
CNVR_4188	14	11916692	11917459	768	DEL	3	56	8	0	17	6	10	5	9	1	YES	YES	NO	NO
CNVR_4189	14	11916758	11917333	576	DEL	3	51	7	0	16	2	12	6	6	2	YES	YES	NO	NO
CNVR_4190	14	11980783	11982440	1658	DEL	3	41	7	0	13	3	3	8	5	2	YES	YES	NO	NO
CNVR_4191	14	11987986	11991900	3915	DEL	3	67	11	0	15	10	15	6	7	3	YES	YES	NO	NO
CNVR_4193	14	12512216	12514115	1900	DEL	3	34	3	0	2	17	0	6	5	1	YES	YES	NO	NO
CNVR_4195	14	13002822	13003891	1070	DEL	2	5	0	0	0	0	0	5	0	0	YES	YES	NO	NO
CNVR_4198	14	14500391	14501271	881	DEL	2	23	7	0	7	0	4	3	0	2	YES	YES	NO	NO
CNVR_4199	14	14506443	14915569	409127	CNV	2	15	0	1	2	3	2	4	3	0	YES	YES	NO	NO
CNVR_4217	14	14583568	14584338	771	DEL	2	107	22	1	24	19	19	14	5	3	YES	YES	NO	NO
CNVR_4219	14	14615350	14616793	1444	DEL	3	50	14	0	17	3	9	4	1	2	YES	YES	NO	NO
CNVR_4220	14	14632891	15422273	789383	DEL	2	26	4	0	9	1	7	3	1	1	YES	YES	YES	NO
CNVR_4222	14	14696490	14698526	2037	DEL	2	79	18	0	22	9	16	10	1	3	YES	YES	NO	NO
CNVR_4226	14	14758651	14760939	2289	DEL	2	71	14	0	19	9	17	7	2	3	YES	YES	NO	NO
CNVR_4227	14	14760272	14760938	667	DEL	2	10	1	0	3	0	0	5	1	0	YES	YES	NO	NO
CNVR_4230	14	14831844	14855811	23968	DEL	2	53	4	2	2	22	4	8	9	2	YES	YES	NO	NO
CNVR_4244	14	15037773	15045104	7332	CNV	3	42	1	1	0	17	6	12	5	0	YES	YES	NO	NO
CNVR_4246	14	15053557	15055262	1706	DEL	2	42	1	3	0	17	1	13	7	0	YES	YES	NO	NO
CNVR_4248	14	15056231	15057679	1449	DEL	3	52	9	1	14	12	1	11	1	3	YES	YES	NO	NO
CNVR_4255	14	15117174	15120301	3128	DEL	2	5	0	0	2	0	0	2	0	1	YES	YES	NO	NO
CNVR_4262	14	15199254	15381758	182505	DEL	2	85	21	0	22	8	15	13	3	3	YES	YES	NO	NO
CNVR_4264	14	15241743	15246130	4388	DEL	2	51	14	0	18	3	10	3	1	2	YES	YES	NO	NO
CNVR_4265	14	15258547	15273300	14754	DEL	2	107	20	1	25	15	21	16	6	3	YES	YES	NO	NO
CNVR_4276	14	15338001	15340005	2005	DEL	2	18	8	0	3	0	3	2	0	2	YES	YES	NO	NO
CNVR_4279	14	15375038	15375987	950	DEL	2	15	3	0	5	0	4	2	0	1	YES	YES	NO	NO
CNVR_4280	14	15376264	15378938	2675	DEL	2	27	4	0	10	0	6	4	0	3	YES	YES	NO	NO
CNVR_4281	14	15385853	15387104	1252	DEL	2	13	5	0	4	0	0	4	0	0	YES	YES	NO	NO
CNVR_4284	14	15425251	15433576	8326	DEL	4	5	1	0	0	0	0	4	0	0	YES	YES	NO	NO
CNVR_4290	14	16013854	16014902	1049	DEL	3	39	0	1	7	5	5	9	9	3	YES	YES	NO	NO
CNVR_4292	14	16077186	16077779	594	DEL	3	25	5	0	3	6	5	4	1	1	YES	YES	NO	NO
CNVR_4300	14	17450827	17452506	1680	DEL	3	86	20	0	25	16	7	11	4	3	YES	YES	NO	NO
CNVR_4303	14	18375430	18377100	1671	DEL	2	8	2	0	1	1	0	3	0	1	YES	YES	NO	NO
CNVR_4306	14	19012001	19014250	2250	DEL	4	93	12	1	19	21	14	13	10	3	YES	YES	NO	NO
CNVR_4313	14	19883482	19884391	910	DEL	3	57	21	0	9	4	10	7	4	2	YES	YES	NO	NO
CNVR_4314	14	19931989	19933024	1036	DEL	3	24	7	0	1	1	8	3	3	1	YES	YES	NO	NO
CNVR_4315	14	20251898	20253191	1294	DEL	3	19	0	0	9	6	0	3	0	1	YES	YES	NO	NO
CNVR_4317	14	20463751	20466640	2890	DEL	4	40	10	0	8	8	7	4	2	1	YES	YES	NO	NO
CNVR_4330	14	21886501	21893000	6500	DEL	3	29	6	0	0	8	1	8	3	3	YES	YES	NO	NO
CNVR_4334	14	22568501	22573500	5000	DEL	4	149	24	1	24	40	23	22	12	3	YES	YES	NO	NO
CNVR_4339	14	23735501	23737628	2128	DEL	4	144	21	1	25	43	21	13	17	3	YES	YES	NO	NO
CNVR_4344	14	25802380	25804517	2138	DEL	2	74	23	0	22	5	15	6	0	3	YES	YES	NO	NO
CNVR_4345	14	26517196	26518061	866	DEL	3	132	25	0	25	24	20	21	14	3	YES	YES	NO	NO
CNVR_4348	14	27594601	27603000	8400	DEL	4	4	0	0	1	0	1	2	0	0	YES	YES	NO	NO
CNVR_4350	14	28391918	28393176	1259	DEL	4	85	20	0	20	14	14	9	5	3	YES	YES	NO	NO
CNVR_4357	14	30860105	30860846	742	DEL	3	10	1	0	0	2	3	3	0	1	YES	YES	NO	NO
CNVR_4360	14	31144966	31145755	790	DEL	2	46	13	0	16	2	8	5	0	2	YES	YES	NO	NO
CNVR_4364	14	31966093	31967631	1539	DEL	2	22	4	0	6	9	0	2	0	1	YES	YES	NO	NO
CNVR_4365	14	32596201	32599250	3050	DEL	4	62	13	0	20	7	10	6	3	3	YES	YES	NO	NO
CNVR_4369	14	33296316	33297697	1382	DEL	3	41	11	0	4	6	9	8	1	2	YES	YES	NO	NO
CNVR_4370	14	33419751	33421589	1839	DEL	3	12	6	0	0	2	0	3	1	0	YES	YES	NO	NO
CNVR_4371	14	33449701	33454000	4300	DEL	4	74	20	0	23	7	15	6	0	3	YES	YES	NO	NO
CNVR_4373	14	33684309	33685081	773	DEL	3	46	9	0	10	9	8	5	4	1	YES	YES	NO	NO
CNVR_4380	14	34407501	34414455	6955	DEL	3	36	8	0	5	0	11	10	0	2	YES	YES	NO	NO
CNVR_4383	14	35226113	35227750	1638	DEL	3	53	8	0	9	4	7	17	6	2	YES	YES	NO	NO
CNVR_4396	14	37400640	37401455	816	DEL	3	131	21	2	21	37	17	20	11	2	YES	YES	NO	NO
CNVR_4397	14	37400701	37401425	725	DEL	3	81	12	2	10	23	10	15	8	1	YES	YES	NO	NO
CNVR_4400	14	37666750	37667822	1073	DEL	3	122	24	1	24	16	22	20	12	3	YES	YES	NO	NO
CNVR_4404	14	38225501	38228500	3000	DEL	3	71	19	0	12	12	14	5	6	3	YES	YES	NO	NO
CNVR_4405	14	38321588	38323569	1982	DEL	3	73	15	0	18	16	7	11	4	2	YES	YES	NO	NO
CNVR_4410	14	39161751	39179700	17950	DEL	4	102	16	0	15	33	14	14	8	2	YES	YES	NO	NO
CNVR_4420	14	41425356	41426392	1037	DEL	3	112	23	0	18	16	22	21	9	3	YES	YES	NO	NO
CNVR_4429	14	42857235	42877484	20250	DEL	2	79	19	0	22	12	16	6	1	3	YES	YES	NO	NO
CNVR_4433	14	44041448	44042222	775	DEL	3	63	10	0	14	20	10	5	4	0	YES	YES	NO	NO
CNVR_4440	14	45402189	45472628	70440	DEL	2	23	6	0	7	2	4	4	0	0	YES	YES	NO	NO
CNVR_4445	14	46195954	46197000	1047	DEL	3	22	4	0	5	4	2	7	0	0	YES	YES	NO	NO
CNVR_4446	14	46312135	46313562	1428	DEL	3	15	1	0	2	2	6	2	2	0	YES	YES	NO	NO
CNVR_4447	14	46364998	46368000	3003	DEL	4	12	1	0	0	1	6	1	3	0	YES	YES	NO	NO
CNVR_4448	14	46452685	46581486	128802	DEL	2	42	7	0	12	11	6	5	0	1	YES	YES	NO	NO
CNVR_4449	14	46675469	46678156	2688	DEL	3	170	25	2	25	49	25	27	14	3	YES	YES	NO	NO
CNVR_4450	14	46744508	46745564	1057	DEL	3	44	2	0	8	18	2	8	4	2	YES	YES	NO	NO
CNVR_4454	14	49132143	49132764	622	DEL	3	19	4	0	4	2	2	4	2	1	YES	YES	NO	NO
CNVR_4459	14	50888974	50889755	782	DEL	3	29	12	0	5	0	6	4	1	1	YES	YES	NO	NO
CNVR_4466	14	51870087	51870918	832	DEL	3	68	13	1	11	14	12	5	10	2	YES	YES	NO	NO
CNVR_4472	14	52324633	52325851	1219	DEL	3	85	19	0	16	15	18	8	7	2	YES	YES	NO	NO
CNVR_4473	14	52332486	52334109	1624	DEL	4	46	6	0	6	13	12	4	4	1	YES	YES	NO	NO
CNVR_4475	14	52741933	52744268	2336	DEL	4	63	19	1	9	10	12	10	1	1	YES	YES	NO	NO
CNVR_4476	14	52755126	52756500	1375	DEL	3	93	23	0	17	21	17	11	3	1	YES	YES	NO	NO
CNVR_4477	14	52781710	52782333	624	DEL	3	10	0	0	4	0	0	4	0	2	YES	YES	NO	NO
CNVR_4482	14	53200756	53201196	441	DEL	3	17	3	0	3	4	1	3	3	0	YES	YES	NO	NO
CNVR_4486	14	54019251	54026100	6850	DUP	2	10	0	0	4	0	3	3	0	0	YES	YES	NO	NO
CNVR_4488	14	54112001	54128000	16000	DEL	4	77	4	0	23	24	5	14	4	3	YES	YES	NO	NO
CNVR_4495	14	54458001	54464141	6141	DEL	3	33	8	0	9	2	9	3	0	2	YES	YES	NO	NO
CNVR_4499	14	54807301	54836093	28793	DEL	4	29	6	0	9	1	5	6	1	1	YES	YES	NO	NO
CNVR_4506	14	55582944	55585976	3033	DEL	4	17	0	0	2	9	3	3	0	0	YES	YES	NO	NO
CNVR_4507	14	55615751	55627500	11750	DEL	3	2	0	0	0	0	0	2	0	0	YES	YES	NO	NO
CNVR_4509	14	55641179	55641758	580	DEL	3	5	0	0	0	1	0	2	2	0	YES	YES	NO	NO
CNVR_4510	14	55647209	55648797	1589	DEL	3	100	23	0	17	15	17	20	6	2	YES	YES	NO	NO
CNVR_4511	14	55680901	55685750	4850	DEL	4	17	6	0	4	2	3	2	0	0	YES	YES	NO	NO
CNVR_4513	14	55816961	55817775	815	DEL	3	13	2	0	2	3	0	5	1	0	YES	YES	NO	NO
CNVR_4515	14	55875084	55876427	1344	DEL	3	31	9	0	4	4	3	7	2	2	YES	YES	NO	NO
CNVR_4519	14	56075423	56079912	4490	DEL	4	25	4	0	13	5	0	3	0	0	YES	YES	NO	NO
CNVR_4521	14	56267400	56268892	1493	DEL	3	36	4	0	12	8	1	5	3	3	YES	YES	NO	NO
CNVR_4531	14	57846926	57847682	757	DEL	4	31	6	1	5	7	4	5	1	2	YES	YES	NO	NO
CNVR_4534	14	58193097	58195754	2658	DEL	3	4	0	0	1	0	0	3	0	0	YES	YES	NO	NO
CNVR_4538	14	58917063	58918015	953	DEL	3	69	11	0	19	16	8	2	11	2	YES	YES	NO	NO
CNVR_4542	14	59664591	59669099	4509	DEL	3	16	2	0	2	5	3	3	1	0	YES	YES	NO	NO
CNVR_4544	14	59785155	59786118	964	DEL	3	131	24	0	24	33	20	17	10	3	YES	YES	NO	NO
CNVR_4546	14	60188776	60190166	1391	DEL	3	11	0	0	3	2	0	6	0	0	YES	YES	NO	NO
CNVR_4550	14	60606207	60607750	1544	DEL	3	65	17	1	10	16	9	6	4	2	YES	YES	NO	NO
CNVR_4552	14	60810778	60812785	2008	DEL	3	35	12	0	6	0	9	6	0	2	YES	YES	NO	NO
CNVR_4558	14	61602251	61603835	1585	DEL	3	16	7	0	2	2	1	4	0	0	YES	YES	NO	NO
CNVR_4561	14	61988501	61995530	7030	DEL	3	96	18	0	15	15	21	13	11	3	YES	YES	NO	NO
CNVR_4564	14	62318001	62322250	4250	DEL	3	39	10	0	8	10	2	4	3	2	YES	YES	NO	NO
CNVR_4568	14	62869204	63401279	532076	DEL	2	20	4	0	2	3	2	4	5	0	YES	YES	NO	NO
CNVR_4575	14	64563751	64566500	2750	DEL	3	10	0	0	0	6	0	4	0	0	YES	YES	NO	NO
CNVR_4576	14	64809780	64810689	910	DEL	3	99	21	0	24	17	21	9	4	3	YES	YES	NO	NO
CNVR_4578	14	64906399	64907750	1352	DEL	4	32	4	0	11	2	4	8	0	3	YES	YES	NO	NO
CNVR_4582	14	66127197	66128177	981	DEL	4	26	5	0	7	3	1	7	3	0	YES	YES	NO	NO
CNVR_4584	14	66459943	66460979	1037	DEL	3	62	13	0	13	17	7	9	2	1	YES	YES	NO	NO
CNVR_4585	14	66613142	66614883	1742	DEL	4	31	6	0	7	3	2	9	2	2	YES	YES	NO	NO
CNVR_4589	14	66728475	66728947	473	DEL	3	39	4	0	8	8	7	5	6	1	YES	YES	NO	NO
CNVR_4591	14	67310991	67311814	824	DEL	2	63	18	0	16	6	12	8	2	1	YES	YES	NO	NO
CNVR_4593	14	67929979	67931500	1522	DEL	2	42	5	0	7	17	5	6	2	0	YES	YES	NO	NO
CNVR_4602	14	68963483	68964786	1304	DEL	3	51	9	1	7	9	5	11	7	2	YES	YES	NO	NO
CNVR_4603	14	69175130	69175920	791	DEL	3	22	3	0	7	4	2	5	0	1	YES	YES	NO	NO
CNVR_4612	14	70793321	70812327	19007	DEL	3	65	16	0	16	8	13	8	1	3	YES	YES	NO	NO
CNVR_4613	14	70996170	70998764	2595	DEL	3	68	18	0	8	14	9	11	5	3	YES	YES	NO	NO
CNVR_4614	14	71014460	71016000	1541	DEL	3	145	24	0	25	40	20	21	12	3	YES	YES	NO	NO
CNVR_4615	14	71433838	71435000	1163	DEL	3	99	22	0	24	16	19	11	4	3	YES	YES	NO	NO
CNVR_4616	14	71491751	71495750	4000	DEL	4	85	15	0	23	16	13	13	3	2	YES	YES	NO	NO
CNVR_4618	14	72575001	72584500	9500	DEL	3	151	25	3	25	39	24	21	11	3	YES	YES	NO	NO
CNVR_4624	14	73474486	73475241	756	DEL	3	4	0	0	1	0	0	3	0	0	YES	YES	NO	NO
CNVR_4628	14	74362751	74365500	2750	DEL	3	55	16	0	7	11	11	4	5	1	YES	YES	NO	NO
CNVR_4629	14	74467529	74468173	645	DEL	3	9	0	0	0	0	0	9	0	0	YES	YES	NO	NO
CNVR_4640	14	76762268	76763159	892	DEL	3	116	23	0	25	18	24	14	9	3	YES	YES	NO	NO
CNVR_4654	14	78300789	78301479	691	DEL	2	17	2	0	5	2	5	3	0	0	YES	YES	NO	NO
CNVR_4655	14	78309825	78310675	851	DEL	3	27	4	0	3	6	4	6	2	2	YES	YES	NO	NO
CNVR_4660	14	78690001	78695250	5250	DEL	4	176	25	3	25	50	24	27	19	3	YES	YES	NO	NO
CNVR_4661	14	79159501	79329500	170000	DEL	2	5	0	0	0	5	0	0	0	0	NO	NO	YES	NO
CNVR_4664	14	79444740	79446119	1380	DEL	4	64	17	0	21	5	11	7	0	3	YES	YES	NO	NO
CNVR_4667	14	79523028	79591749	68722	DEL	3	65	14	0	11	12	14	8	5	1	YES	YES	NO	NO
CNVR_4672	14	79981751	79984200	2450	DEL	4	33	8	0	1	5	10	6	3	0	YES	YES	NO	NO
CNVR_4673	14	80086251	80091750	5500	DEL	4	30	10	0	7	2	4	5	0	2	YES	YES	NO	NO
CNVR_4682	14	80501149	80502591	1443	DEL	4	36	1	1	4	8	2	11	7	2	YES	YES	NO	NO
CNVR_4684	14	80629171	80629867	697	DEL	3	61	13	0	13	9	13	5	7	1	YES	YES	NO	NO
CNVR_4687	14	81023364	81024165	802	DEL	3	44	11	0	9	6	9	7	1	1	YES	YES	NO	NO
CNVR_4693	14	81164964	81165624	661	DEL	3	22	3	0	4	6	2	5	2	0	YES	YES	NO	NO
CNVR_4696	14	81390251	81395250	5000	DEL	3	167	25	2	25	45	24	25	18	3	YES	YES	NO	NO
CNVR_4698	14	81468001	81470657	2657	DEL	4	54	19	0	14	2	12	3	2	2	YES	YES	NO	NO
CNVR_4705	14	81811485	81812123	639	DEL	3	49	7	0	11	8	12	8	2	1	YES	YES	NO	NO
CNVR_4707	14	82219501	82221066	1566	DEL	3	164	24	0	25	44	26	24	18	3	YES	YES	NO	NO
CNVR_4708	14	82306479	82307131	653	DEL	3	54	12	0	9	4	11	8	8	2	YES	YES	NO	NO
CNVR_4715	14	82541409	82543085	1677	DEL	3	8	0	0	3	0	0	4	0	1	YES	YES	NO	NO
CNVR_4717	14	82701352	82713974	12623	DEL	3	81	18	0	24	12	13	9	3	2	YES	YES	NO	NO
CNVR_4720	14	82762438	82763926	1489	DEL	3	73	9	0	21	11	15	12	2	3	YES	YES	NO	NO
CNVR_4724	14	83087489	83088837	1349	DEL	3	23	2	0	7	1	5	5	0	3	YES	YES	NO	NO
CNVR_4733	14	84433869	84435401	1533	DEL	3	103	22	1	23	30	14	9	1	3	YES	YES	NO	NO
CNVR_4750	15	717729	738411	20683	DEL	3	135	23	1	23	35	23	15	12	3	YES	YES	NO	NO
CNVR_4758	15	1287251	1295250	8000	DEL	3	28	10	0	6	0	6	4	1	1	YES	YES	NO	NO
CNVR_4763	15	2342636	2343778	1143	DEL	3	67	16	0	23	11	10	1	3	3	YES	YES	NO	NO
CNVR_4767	15	3013621	3014369	749	DEL	3	11	1	0	0	3	1	3	3	0	YES	YES	NO	NO
CNVR_4768	15	3027501	3029838	2338	DEL	3	19	2	0	0	5	1	7	4	0	YES	YES	NO	NO
CNVR_4769	15	3263567	3264529	963	DEL	3	128	24	1	23	16	21	26	15	2	YES	YES	NO	NO
CNVR_4772	15	3495658	3496826	1169	DEL	3	104	19	1	18	24	18	18	3	3	YES	YES	NO	NO
CNVR_4779	15	3877657	3879250	1594	DEL	3	58	9	0	8	21	7	6	7	0	YES	YES	NO	NO
CNVR_4785	15	4198223	4198814	592	DEL	2	2	0	0	0	0	0	2	0	0	YES	YES	NO	NO
CNVR_4797	15	5065268	5066812	1545	DEL	4	89	19	2	13	21	16	5	11	2	YES	YES	NO	NO
CNVR_4805	15	6048067	6117560	69494	CNV	2	13	0	0	0	4	3	4	2	0	YES	YES	NO	NO
CNVR_4816	15	7077751	7078862	1112	DEL	3	129	20	0	24	36	22	20	4	3	YES	YES	NO	NO
CNVR_4821	15	7431152	7431946	795	DEL	3	49	9	0	11	7	13	6	2	1	YES	YES	NO	NO
CNVR_4823	15	7538251	7539900	1650	DEL	3	65	13	0	15	9	15	6	5	2	YES	YES	NO	NO
CNVR_4824	15	7796971	7941134	144164	DEL	3	109	24	0	25	20	19	11	7	3	YES	YES	NO	NO
CNVR_4826	15	8201123	8210788	9666	DEL	2	44	12	0	13	1	9	6	0	3	YES	YES	NO	NO
CNVR_4828	15	8777001	8778676	1676	DEL	3	30	1	1	8	3	8	7	1	1	YES	YES	NO	NO
CNVR_4833	15	9577499	9578540	1042	DEL	3	85	17	0	18	13	21	13	2	1	YES	YES	NO	NO
CNVR_4842	15	10200731	10201364	634	DEL	3	13	5	0	2	0	1	0	5	0	YES	YES	NO	NO
CNVR_4843	15	10241620	10244515	2896	DEL	2	4	0	0	0	0	0	4	0	0	YES	YES	NO	NO
CNVR_4853	15	11009079	11010330	1252	DEL	4	50	3	0	13	2	12	11	9	0	YES	YES	NO	NO
CNVR_4854	15	11024139	11025102	964	DEL	3	83	20	1	11	17	18	8	5	3	YES	YES	NO	NO
CNVR_4855	15	11119380	11169338	49959	DEL	3	20	6	0	3	3	2	2	3	1	YES	YES	NO	NO
CNVR_4859	15	11211983	11212576	594	DEL	3	82	15	0	13	13	20	11	7	3	YES	YES	NO	NO
CNVR_4860	15	11274177	11275980	1804	DEL	3	25	5	0	2	4	1	7	3	3	YES	YES	NO	NO
CNVR_4862	15	11310423	11313250	2828	DEL	3	80	22	1	22	5	14	8	5	3	YES	YES	NO	NO
CNVR_4864	15	11374501	11392800	18300	DEL	4	44	7	0	13	9	3	6	5	1	YES	YES	NO	NO
CNVR_4867	15	11537501	11538593	1093	DEL	2	24	2	0	12	0	5	4	0	1	YES	YES	NO	NO
CNVR_4878	15	12235154	12236235	1082	DEL	3	42	4	0	18	3	9	4	3	1	YES	YES	NO	NO
CNVR_4883	15	12727437	12729126	1690	DEL	3	48	6	0	12	10	9	7	3	1	YES	YES	NO	NO
CNVR_4889	15	13113251	13118000	4750	DEL	4	7	0	0	0	0	0	7	0	0	YES	YES	NO	NO
CNVR_4891	15	13230843	13232072	1230	DEL	3	143	20	2	25	42	25	11	15	3	YES	YES	NO	NO
CNVR_4904	15	16883001	16895700	12700	DEL	4	17	2	0	6	1	6	2	0	0	YES	YES	NO	NO
CNVR_4909	15	16982325	16984545	2221	DEL	3	71	17	0	10	9	14	11	7	3	YES	YES	NO	NO
CNVR_4927	15	18316751	18318380	1630	DEL	3	107	22	0	25	23	16	15	3	3	YES	YES	NO	NO
CNVR_4928	15	18341701	18344750	3050	DEL	4	66	21	0	20	7	7	7	1	3	YES	YES	NO	NO
CNVR_4932	15	19114244	19115487	1244	DEL	4	114	25	0	23	22	18	15	8	3	YES	YES	NO	NO
CNVR_4944	15	22042564	22046250	3687	DEL	3	159	24	1	24	44	23	24	17	2	YES	YES	NO	NO
CNVR_4948	15	22115280	22115818	539	DEL	3	27	7	0	2	4	4	4	3	3	YES	YES	NO	NO
CNVR_4951	15	23179904	23180923	1020	DEL	3	69	12	0	18	10	13	8	6	2	YES	YES	NO	NO
CNVR_4961	15	25640547	25641584	1038	DEL	3	7	1	0	0	0	1	2	3	0	YES	YES	NO	NO
CNVR_4976	15	28966744	28968000	1257	DEL	3	68	16	0	21	5	14	8	1	3	YES	YES	NO	NO
CNVR_4983	15	31292291	31292908	618	DEL	3	41	10	2	7	0	4	12	6	0	YES	YES	NO	NO
CNVR_4987	15	32565501	32572319	6819	DEL	4	16	0	0	3	0	3	8	2	0	YES	YES	NO	NO
CNVR_4988	15	32929667	32930482	816	DEL	3	96	18	1	22	19	16	12	5	3	YES	YES	NO	NO
CNVR_4989	15	33328509	33329777	1269	DEL	3	15	1	0	5	0	1	6	2	0	YES	YES	NO	NO
CNVR_4996	15	34923238	34924183	946	DEL	3	65	9	0	16	14	11	11	3	1	YES	YES	NO	NO
CNVR_4998	15	35697827	35699136	1310	DEL	3	50	6	0	7	9	12	13	2	1	YES	YES	NO	NO
CNVR_5012	15	39061448	39062617	1170	DEL	3	24	13	0	1	1	1	7	1	0	YES	YES	NO	NO
CNVR_5014	15	40522597	40523713	1117	DEL	3	92	14	1	10	24	15	17	8	3	YES	YES	NO	NO
CNVR_5020	15	41791751	41794250	2500	DEL	3	58	14	0	16	6	10	7	3	2	YES	YES	NO	NO
CNVR_5023	15	42189251	42195300	6050	DEL	3	63	16	0	21	5	15	4	0	2	YES	YES	NO	NO
CNVR_5028	15	43133962	43135874	1913	DEL	4	139	23	1	20	40	22	21	9	3	YES	YES	NO	NO
CNVR_5031	15	43420411	43422384	1974	DEL	4	151	20	2	25	39	26	21	16	2	YES	YES	NO	NO
CNVR_5052	15	46084356	46084984	629	DEL	3	32	3	0	6	9	6	6	2	0	YES	YES	NO	NO
CNVR_5056	15	46203883	46204877	995	DEL	4	78	20	0	22	12	12	6	3	3	YES	YES	NO	NO
CNVR_5070	15	46660790	46661549	760	DEL	3	22	1	0	5	0	9	3	4	0	YES	YES	NO	NO
CNVR_5072	15	46671899	46675700	3802	DEL	3	34	10	0	4	9	8	2	0	1	YES	YES	NO	NO
CNVR_5073	15	46674024	46674913	890	DEL	3	57	12	0	14	6	8	9	7	1	YES	YES	NO	NO
CNVR_5077	15	46766392	46769343	2952	DEL	3	81	17	0	16	18	17	6	5	2	YES	YES	NO	NO
CNVR_5079	15	46837953	46991837	153885	DEL	2	34	7	0	11	4	6	4	2	0	YES	YES	NO	YES
CNVR_5081	15	46850083	46850926	844	DEL	3	18	2	0	3	6	2	5	0	0	YES	YES	NO	NO
CNVR_5083	15	46869765	46871019	1255	DEL	3	63	16	0	14	11	13	4	3	2	YES	YES	NO	NO
CNVR_5087	15	47373001	47377750	4750	DEL	3	145	24	0	24	37	21	23	13	3	YES	YES	NO	NO
CNVR_5092	15	47843096	47985328	142233	DEL	3	46	8	1	8	8	5	9	4	3	YES	YES	YES	NO
CNVR_5098	15	48008066	48009224	1159	DEL	3	75	14	0	13	15	18	10	3	2	YES	YES	NO	NO
CNVR_5103	15	48234200	48238644	4445	DEL	2	60	12	0	17	4	9	8	7	3	YES	YES	NO	NO
CNVR_5105	15	48326608	48328174	1567	DEL	2	16	7	0	3	0	2	2	1	1	YES	YES	NO	NO
CNVR_5113	15	48587001	48591000	4000	DEL	4	47	4	0	9	14	3	11	5	1	YES	YES	NO	NO
CNVR_5122	15	49104960	49106158	1199	DEL	3	24	8	0	4	1	5	6	0	0	YES	YES	NO	NO
CNVR_5129	15	49489751	49494500	4750	DUP	2	20	1	0	3	9	0	7	0	0	YES	YES	NO	NO
CNVR_5131	15	49557944	49703488	145545	CNV	3	40	4	0	7	8	5	11	4	1	YES	YES	NO	NO
CNVR_5134	15	49829501	49831626	2126	DEL	3	10	3	0	1	0	1	4	0	1	YES	YES	NO	NO
CNVR_5135	15	49857301	49959500	102200	DEL	4	51	15	0	20	7	5	3	0	1	YES	YES	NO	NO
CNVR_5140	15	50148471	50154724	6254	DEL	3	24	2	0	5	0	8	8	1	0	YES	YES	NO	NO
CNVR_5142	15	50363551	50366750	3200	DEL	3	62	12	0	20	6	11	7	3	3	YES	YES	NO	NO
CNVR_5150	15	50687501	50779723	92223	CNV	3	40	2	1	2	19	3	6	7	0	YES	YES	NO	YES
CNVR_5158	15	51453184	51454090	907	DEL	3	23	2	0	6	0	7	6	1	1	YES	YES	NO	NO
CNVR_5159	15	51551286	51579184	27899	DEL	2	6	0	0	1	0	3	2	0	0	YES	YES	NO	NO
CNVR_5163	15	51622264	51623340	1077	DEL	3	54	13	0	18	0	10	9	1	3	YES	YES	NO	NO
CNVR_5169	15	51774250	51774895	646	DEL	2	10	1	0	1	0	3	5	0	0	YES	YES	NO	NO
CNVR_5172	15	51945008	51945719	712	DEL	2	8	2	0	1	0	1	3	0	1	YES	YES	NO	NO
CNVR_5174	15	52197773	52216345	18573	DEL	2	46	9	2	11	8	8	6	0	2	YES	YES	NO	NO
CNVR_5181	15	52383247	52384812	1566	DEL	3	32	7	0	12	0	4	8	0	1	YES	YES	NO	NO
CNVR_5186	15	52756380	52757185	806	DEL	4	25	1	0	9	0	4	9	1	1	YES	YES	NO	NO
CNVR_5188	15	53286460	53287990	1531	DEL	3	20	4	0	6	0	3	7	0	0	YES	YES	NO	NO
CNVR_5196	15	55261650	55263031	1382	DEL	4	134	23	1	25	37	20	16	9	3	YES	YES	NO	NO
CNVR_5202	15	56641950	56642879	930	DEL	4	129	24	1	25	30	22	14	10	3	YES	YES	NO	NO
CNVR_5204	15	57006376	57007336	961	DEL	2	25	11	0	4	0	5	5	0	0	YES	YES	NO	NO
CNVR_5206	15	57230547	57231412	866	DEL	3	31	13	0	5	0	5	4	2	2	YES	YES	NO	NO
CNVR_5207	15	57244724	57246000	1277	DEL	3	11	6	0	1	0	1	3	0	0	YES	YES	NO	NO
CNVR_5210	15	57671441	57676802	5362	DEL	3	29	7	0	9	0	3	7	1	2	YES	YES	NO	NO
CNVR_5215	15	57784253	57785780	1528	DEL	4	37	8	0	2	8	7	7	2	3	YES	YES	NO	NO
CNVR_5216	15	57786176	57787160	985	DEL	4	54	10	0	1	18	10	9	3	3	YES	YES	NO	NO
CNVR_5225	15	58802524	58803229	706	DEL	3	18	0	0	3	5	3	4	2	1	YES	YES	NO	NO
CNVR_5226	15	58802621	58803138	518	DEL	3	11	0	0	0	4	2	3	2	0	YES	YES	NO	NO
CNVR_5227	15	59072695	59660475	587781	DEL	3	60	16	0	15	8	7	4	8	2	YES	YES	NO	NO
CNVR_5228	15	59240971	59242287	1317	DEL	3	71	18	0	9	11	15	9	7	2	YES	YES	NO	NO
CNVR_5230	15	59651466	59652904	1439	DEL	4	47	12	0	8	9	1	9	5	3	YES	YES	NO	NO
CNVR_5232	15	60619544	60620277	734	DEL	3	24	5	0	5	6	4	2	2	0	YES	YES	NO	NO
CNVR_5233	15	60619610	60620207	598	DEL	3	86	16	0	12	19	18	10	9	2	YES	YES	NO	NO
CNVR_5239	15	61408751	61410935	2185	DEL	4	70	19	0	19	6	16	8	1	1	YES	YES	NO	NO
CNVR_5241	15	61476751	61478107	1357	DEL	3	56	14	0	18	3	12	6	0	3	YES	YES	NO	NO
CNVR_5247	15	63742454	63743296	843	DEL	3	9	0	0	0	4	1	3	1	0	YES	YES	NO	NO
CNVR_5248	15	64625501	64627119	1619	DEL	4	8	0	0	0	1	1	6	0	0	YES	YES	NO	NO
CNVR_5250	15	64951467	65016783	65317	DEL	2	81	21	0	20	9	17	10	2	2	YES	YES	NO	NO
CNVR_5252	15	65280437	65281291	855	DEL	4	19	2	0	4	4	3	5	0	1	YES	YES	NO	NO
CNVR_5255	15	66130740	66131819	1080	DEL	4	50	2	0	16	18	4	0	7	3	YES	YES	NO	NO
CNVR_5266	15	68340901	68342400	1500	DEL	3	19	5	0	7	0	1	6	0	0	YES	YES	NO	NO
CNVR_5270	15	68635590	68644368	8779	DEL	2	14	3	0	6	0	0	4	0	1	YES	YES	NO	NO
CNVR_5272	15	68823251	68826250	3000	DEL	4	44	10	0	10	4	12	5	0	3	YES	YES	NO	NO
CNVR_5274	15	68908935	68909956	1022	DEL	3	91	17	0	23	14	17	8	10	2	YES	YES	NO	NO
CNVR_5278	15	69055365	69056905	1541	DEL	4	40	9	0	5	6	13	4	2	1	YES	YES	NO	NO
CNVR_5279	15	69088481	69089261	781	DEL	3	29	3	0	13	2	3	5	2	1	YES	YES	NO	NO
CNVR_5280	15	69242371	69243497	1127	DEL	3	78	16	1	19	7	15	11	7	2	YES	YES	NO	NO
CNVR_5281	15	69288751	69300300	11550	DEL	4	27	6	0	1	6	2	7	5	0	YES	YES	NO	NO
CNVR_5282	15	69420674	69422057	1384	DEL	3	101	22	0	22	10	23	13	8	3	YES	YES	NO	NO
CNVR_5284	15	69540932	69541714	783	DEL	3	26	2	0	10	0	7	4	0	3	YES	YES	NO	NO
CNVR_5289	15	70356301	70359750	3450	DEL	3	51	11	0	16	2	12	8	1	1	YES	YES	NO	NO
CNVR_5298	15	70894357	70896329	1973	DEL	4	44	10	0	4	9	12	8	0	1	YES	YES	NO	NO
CNVR_5305	15	71146959	71147704	746	DEL	3	25	5	0	10	2	0	2	3	3	YES	YES	NO	NO
CNVR_5308	15	71499907	71500649	743	DEL	3	51	16	0	4	8	17	2	2	2	YES	YES	NO	NO
CNVR_5309	15	71535165	71535944	780	DEL	3	85	17	1	20	11	16	10	8	2	YES	YES	NO	NO
CNVR_5310	15	71761459	71762837	1379	DEL	3	32	2	0	4	9	11	4	1	1	YES	YES	NO	NO
CNVR_5314	15	73580654	73581701	1048	DEL	3	91	16	0	24	18	12	10	8	3	YES	YES	NO	NO
CNVR_5316	15	73686505	73688041	1537	DEL	4	63	13	1	19	5	12	7	3	3	YES	YES	NO	NO
CNVR_5330	15	76541952	76542831	880	DEL	3	15	4	0	2	1	0	7	1	0	YES	YES	NO	NO
CNVR_5339	15	78331139	78342900	11762	DEL	3	23	4	0	9	0	4	3	1	2	YES	YES	NO	NO
CNVR_5341	15	78545397	78545755	359	DEL	2	15	2	0	0	8	3	2	0	0	YES	YES	NO	NO
CNVR_5349	15	79136110	79151229	15120	DEL	3	33	7	0	7	8	5	5	1	0	YES	YES	NO	NO
CNVR_5352	15	79271078	79273233	2156	DEL	3	32	8	0	7	3	9	2	3	0	YES	YES	NO	NO
CNVR_5361	15	79480815	79481352	538	DEL	2	8	0	0	0	4	1	1	2	0	YES	YES	NO	NO
CNVR_5371	15	79888180	79889103	924	DEL	3	133	24	2	25	32	23	17	7	3	YES	YES	NO	NO
CNVR_5381	15	80290501	80291822	1322	DEL	3	56	14	0	17	8	11	5	0	1	YES	YES	NO	NO
CNVR_5383	15	80418723	80947245	528523	CNV	4	87	19	1	13	25	13	10	3	3	YES	YES	YES	YES
CNVR_5392	15	81444329	81445894	1566	DEL	3	74	21	1	14	12	9	10	5	2	YES	YES	NO	NO
CNVR_5409	15	82591251	82603046	11796	DEL	3	113	20	1	25	27	17	11	9	3	YES	YES	NO	NO
CNVR_5411	15	82700627	82702250	1624	DEL	4	81	18	0	20	13	17	9	1	3	YES	YES	NO	NO
CNVR_5416	15	82818346	82820144	1799	DEL	3	76	24	0	16	9	16	8	1	2	YES	YES	NO	NO
CNVR_5420	15	82875751	82880500	4750	DEL	3	109	22	2	14	29	14	14	11	3	YES	YES	NO	NO
CNVR_5426	15	83074148	83077116	2969	DEL	3	48	14	0	12	3	6	6	5	2	YES	YES	NO	NO
CNVR_5427	15	83093547	83094441	895	DEL	2	29	7	0	10	3	6	3	0	0	YES	YES	NO	NO
CNVR_5428	15	83140567	83142000	1434	DEL	3	79	23	0	20	9	15	9	0	3	YES	YES	NO	NO
CNVR_5430	15	83156008	83157053	1046	DEL	4	62	13	0	11	13	10	9	6	0	YES	YES	NO	NO
CNVR_5433	15	83257804	83263500	5697	DEL	2	7	0	0	0	2	1	3	1	0	YES	YES	NO	NO
CNVR_5435	15	83367579	83368270	692	DEL	2	48	8	0	12	7	9	8	3	1	YES	YES	NO	NO
CNVR_5440	15	83557820	83563653	5834	DEL	2	8	0	0	0	2	2	1	3	0	YES	YES	NO	NO
CNVR_5442	15	83641756	83642620	865	DEL	2	7	2	0	2	0	1	2	0	0	YES	YES	NO	NO
CNVR_5443	15	83726062	83862566	136505	CNV	4	82	17	1	18	15	18	7	3	3	YES	YES	NO	NO
CNVR_5469	16	23942	27539	3598	DEL	3	36	14	0	2	2	7	8	1	2	YES	YES	NO	NO
CNVR_5477	16	362101	364316	2216	DEL	3	36	5	0	19	0	4	6	1	1	YES	YES	NO	NO
CNVR_5479	16	421501	428000	6500	DEL	4	95	18	0	23	21	17	11	3	2	YES	YES	NO	NO
CNVR_5482	16	700486	702079	1594	DEL	3	33	14	0	8	5	0	2	2	2	YES	YES	NO	NO
CNVR_5483	16	838701	911473	72773	DEL	3	25	4	0	7	0	2	5	6	1	YES	YES	NO	NO
CNVR_5488	16	2319726	2320203	478	DEL	3	22	4	0	2	4	8	2	2	0	YES	YES	NO	NO
CNVR_5496	16	4520607	4521372	766	DEL	4	45	8	0	6	13	7	8	2	1	YES	YES	NO	NO
CNVR_5498	16	4538485	4539228	744	DEL	2	33	11	0	5	5	7	4	0	1	YES	YES	NO	NO
CNVR_5500	16	4701080	4701764	685	DEL	3	26	1	0	5	9	6	3	1	1	YES	YES	NO	NO
CNVR_5507	16	5215096	5215991	896	DEL	3	125	22	2	21	29	23	13	12	3	YES	YES	NO	NO
CNVR_5514	16	5559248	5644678	85431	DEL	2	37	12	0	6	4	9	4	1	1	YES	YES	NO	YES
CNVR_5518	16	5635230	5978304	343075	DEL	3	22	6	0	3	1	5	4	2	1	YES	YES	YES	NO
CNVR_5523	16	5822954	5825469	2516	DEL	4	17	8	0	2	0	4	2	0	1	YES	YES	NO	NO
CNVR_5527	16	5875926	6048091	172166	DEL	3	33	1	0	4	11	2	9	5	1	YES	YES	NO	NO
CNVR_5535	16	6155673	6156891	1219	DEL	4	103	22	0	23	14	21	11	9	3	YES	YES	NO	NO
CNVR_5536	16	6183001	6184809	1809	DEL	3	14	1	0	0	8	0	5	0	0	YES	YES	NO	NO
CNVR_5537	16	6271089	6272824	1736	DEL	4	44	4	1	6	14	2	12	5	0	YES	YES	NO	NO
CNVR_5540	16	6646464	7788277	1141814	DEL	3	30	1	3	2	12	2	6	3	1	YES	YES	NO	NO
CNVR_5546	16	6831344	7592853	761510	DEL	3	46	1	1	1	14	7	14	8	0	YES	YES	NO	NO
CNVR_5551	16	6948833	7788277	839445	DEL	2	28	2	0	3	5	7	7	3	1	YES	YES	NO	NO
CNVR_5555	16	6992612	6993382	771	DEL	2	33	10	0	5	3	7	5	1	2	YES	YES	NO	NO
CNVR_5558	16	7025355	7025881	527	DEL	2	36	5	0	5	8	6	8	4	0	YES	YES	NO	NO
CNVR_5566	16	7144608	7549546	404939	DEL	2	43	8	1	7	7	7	8	3	2	YES	YES	NO	NO
CNVR_5567	16	7161435	7189362	27928	DEL	3	18	4	0	4	1	3	5	0	1	YES	YES	NO	NO
CNVR_5571	16	7282909	7573466	290558	CNV	3	27	8	0	2	6	3	7	1	0	YES	YES	NO	NO
CNVR_5572	16	7289570	7292875	3306	DEL	3	25	10	0	1	1	4	6	0	3	YES	YES	NO	NO
CNVR_5573	16	7368505	7369370	866	DEL	2	11	2	0	3	0	2	2	0	2	YES	YES	NO	NO
CNVR_5578	16	7464566	7465257	692	DEL	2	25	3	1	4	5	6	2	4	0	YES	YES	NO	NO
CNVR_5581	16	7486477	7549527	63051	DEL	2	53	11	0	14	7	14	4	1	2	YES	YES	NO	NO
CNVR_5582	16	7490257	7494682	4426	DEL	3	43	10	0	10	3	10	7	2	1	YES	YES	NO	NO
CNVR_5583	16	7494877	7495909	1033	DEL	3	111	19	0	21	23	15	17	13	3	YES	YES	NO	NO
CNVR_5585	16	7500011	7815059	315049	DEL	3	7	0	0	0	0	1	3	3	0	YES	YES	NO	NO
CNVR_5586	16	7505762	7506518	757	DEL	3	129	25	1	25	22	25	18	10	3	YES	YES	NO	NO
CNVR_5587	16	7508462	7509573	1112	DEL	3	156	23	1	22	44	24	22	17	3	YES	YES	NO	NO
CNVR_5589	16	7564229	7574172	9944	DEL	2	2	0	0	0	0	0	2	0	0	YES	YES	NO	NO
CNVR_5590	16	7605392	7784730	179339	DEL	3	163	23	2	23	47	25	25	17	1	YES	YES	NO	NO
CNVR_5608	16	8578201	8587750	9550	DEL	4	26	6	0	12	1	3	3	0	1	YES	YES	YES	NO
CNVR_5614	16	9235224	9235854	631	DEL	3	24	6	0	1	3	4	7	2	1	YES	YES	NO	NO
CNVR_5617	16	9277183	9278029	847	DEL	2	62	8	0	14	12	9	11	6	2	YES	YES	NO	NO
CNVR_5618	16	9610466	9620500	10035	DEL	3	81	18	0	11	25	11	13	1	2	YES	YES	NO	NO
CNVR_5631	16	10439463	10440918	1456	DEL	3	86	11	0	17	25	18	7	7	1	YES	YES	NO	NO
CNVR_5633	16	10763751	10768766	5016	DEL	3	75	17	0	15	14	10	14	5	0	YES	YES	NO	NO
CNVR_5634	16	10815648	10819800	4153	DEL	4	56	12	0	18	9	8	5	1	3	YES	YES	NO	NO
CNVR_5642	16	11074772	11075402	631	DEL	2	26	2	0	1	11	5	6	1	0	YES	YES	NO	NO
CNVR_5645	16	11204792	11205680	889	DEL	3	137	23	0	25	32	23	20	11	3	YES	YES	NO	NO
CNVR_5647	16	11327126	11328183	1058	DEL	4	69	18	0	15	11	13	7	2	3	YES	YES	NO	NO
CNVR_5650	16	11524501	11533800	9300	DEL	3	32	8	0	7	2	8	4	0	3	YES	YES	NO	NO
CNVR_5654	16	11706383	11707230	848	DEL	3	45	11	0	15	1	5	6	6	1	YES	YES	NO	NO
CNVR_5655	16	11810751	11812655	1905	DEL	3	129	24	0	24	33	18	18	9	3	YES	YES	NO	NO
CNVR_5666	16	13752751	13755750	3000	DEL	4	2	0	0	0	0	0	2	0	0	YES	YES	NO	NO
CNVR_5667	16	13809849	13810821	973	DEL	3	32	9	0	9	1	7	4	0	2	YES	YES	NO	NO
CNVR_5674	16	14320898	14322096	1199	DEL	4	102	20	0	16	29	16	8	10	3	YES	YES	NO	NO
CNVR_5685	16	15186001	15192300	6300	DEL	4	45	14	0	10	0	5	12	2	2	YES	YES	NO	NO
CNVR_5692	16	16036850	16038801	1952	DEL	3	121	22	0	23	30	16	20	8	2	YES	YES	NO	NO
CNVR_5696	16	16408001	16409394	1394	DEL	4	41	7	1	14	1	9	0	6	3	YES	YES	NO	NO
CNVR_5702	16	17328751	17334900	6150	DEL	4	102	21	0	24	17	22	9	6	3	YES	YES	NO	NO
CNVR_5705	16	17396414	17403500	7087	DEL	4	36	5	0	6	5	12	4	2	2	YES	YES	NO	NO
CNVR_5706	16	17396735	17399455	2721	DEL	3	20	2	0	5	4	3	4	2	0	YES	YES	NO	NO
CNVR_5711	16	17835395	17836744	1350	DEL	2	13	1	0	2	1	1	4	4	0	YES	YES	NO	NO
CNVR_5712	16	17904501	17911250	6750	DEL	4	8	4	0	0	0	0	3	1	0	YES	YES	NO	NO
CNVR_5719	16	18206063	18207584	1522	DEL	3	51	15	0	7	0	15	7	5	2	YES	YES	NO	NO
CNVR_5722	16	18289805	18290473	669	DEL	3	31	6	0	9	3	7	2	3	1	YES	YES	NO	NO
CNVR_5726	16	18660959	18662019	1061	DEL	3	32	4	0	7	7	7	3	1	3	YES	YES	NO	NO
CNVR_5729	16	18885989	18886948	960	DEL	3	19	5	0	0	7	3	3	1	0	YES	YES	NO	NO
CNVR_5732	16	19087816	19088827	1012	DEL	3	19	1	0	4	2	5	5	2	0	YES	YES	NO	NO
CNVR_5735	16	19234337	19235176	840	DEL	3	20	4	0	1	6	5	3	0	1	YES	YES	NO	NO
CNVR_5740	16	19756730	19760079	3350	DEL	3	29	4	0	5	8	4	4	3	1	YES	YES	NO	NO
CNVR_5751	16	20595956	20608460	12505	DEL	3	11	2	0	2	1	3	2	1	0	YES	YES	NO	NO
CNVR_5757	16	21575064	21575806	743	DEL	2	10	2	0	0	2	2	3	1	0	YES	YES	NO	NO
CNVR_5762	16	22343220	22344219	1000	DEL	3	101	22	1	20	21	17	10	7	3	YES	YES	NO	NO
CNVR_5765	16	23366991	23367978	988	DEL	3	50	7	1	6	15	8	9	4	0	YES	YES	NO	NO
CNVR_5769	16	23946235	23947125	891	DEL	3	44	15	0	8	5	10	3	1	2	YES	YES	NO	NO
CNVR_5777	16	25342251	25347250	5000	DEL	3	2	0	0	0	0	0	2	0	0	YES	YES	NO	NO
CNVR_5780	16	26732178	26733132	955	DEL	2	12	3	0	3	0	4	2	0	0	YES	YES	NO	NO
CNVR_5783	16	28209474	28213250	3777	DEL	4	47	17	1	9	2	9	2	4	3	YES	YES	NO	NO
CNVR_5788	16	28739240	28740533	1294	DEL	3	127	24	0	21	32	21	15	11	3	YES	YES	NO	NO
CNVR_5789	16	28756881	28759028	2148	DEL	3	118	23	0	25	28	20	13	6	3	YES	YES	NO	NO
CNVR_5791	16	29601501	29602312	812	DEL	4	23	5	0	5	3	0	9	1	0	YES	YES	NO	NO
CNVR_5795	16	31308172	31309300	1129	DEL	3	19	11	0	0	0	5	3	0	0	YES	YES	NO	NO
CNVR_5798	16	32159704	32161031	1328	DEL	3	7	0	1	0	1	2	2	0	1	YES	YES	NO	NO
CNVR_5801	16	32855407	32862663	7257	DEL	2	11	2	0	3	2	2	2	0	0	YES	YES	NO	NO
CNVR_5804	16	33510565	33512330	1766	CNV	3	51	9	0	12	15	3	6	4	2	YES	YES	NO	NO
CNVR_5809	16	34896901	34902500	5600	DEL	4	29	7	0	9	1	4	3	2	3	YES	YES	NO	NO
CNVR_5814	16	35384151	35385916	1766	DEL	3	84	18	1	13	21	16	7	5	3	YES	YES	NO	NO
CNVR_5817	16	36375975	36377552	1578	DEL	3	46	8	0	7	19	6	5	1	0	YES	YES	NO	NO
CNVR_5832	16	38344540	38345573	1034	DEL	3	119	25	0	21	28	22	14	6	3	YES	YES	NO	NO
CNVR_5837	16	38800744	38803077	2334	DEL	3	40	4	0	9	11	4	10	0	2	YES	YES	NO	NO
CNVR_5838	16	39151501	39160643	9143	DEL	3	10	3	0	1	1	3	2	0	0	YES	YES	NO	NO
CNVR_5842	16	39371354	39373107	1754	DEL	3	92	18	0	17	23	18	10	5	1	YES	YES	NO	NO
CNVR_5844	16	40158856	40160408	1553	DEL	3	50	10	0	12	5	10	11	1	1	YES	YES	NO	NO
CNVR_5863	16	45413001	45414366	1366	DEL	3	21	2	0	8	0	5	5	0	1	YES	YES	NO	NO
CNVR_5874	16	48565393	48590306	24914	DEL	2	42	12	0	15	0	8	4	0	3	YES	YES	NO	NO
CNVR_5879	16	49059244	49060025	782	DEL	3	58	10	0	10	17	6	14	0	1	YES	YES	NO	NO
CNVR_5886	16	50190858	50193435	2578	DEL	4	22	7	0	6	0	5	4	0	0	YES	YES	NO	NO
CNVR_5895	16	55213680	55215227	1548	DEL	3	134	18	2	24	37	18	18	15	2	YES	YES	NO	NO
CNVR_5899	16	55711283	55713410	2128	DEL	2	9	3	0	2	1	0	3	0	0	YES	YES	NO	NO
CNVR_5902	16	56269489	56297750	28262	DEL	2	29	11	0	4	2	5	6	1	0	YES	YES	NO	NO
CNVR_5908	16	57402578	57403750	1173	DEL	3	144	24	0	25	39	24	17	12	3	YES	YES	NO	NO
CNVR_5909	16	57926495	57927655	1161	DEL	4	126	20	1	23	33	20	15	11	3	YES	YES	NO	NO
CNVR_5911	16	59026837	59219661	192825	DEL	3	16	0	0	0	7	2	3	4	0	YES	YES	NO	NO
CNVR_5914	16	59299715	59301382	1668	DEL	3	95	19	0	19	24	17	9	5	2	YES	YES	NO	NO
CNVR_5915	16	59300066	59301382	1317	DEL	3	122	24	0	25	28	19	15	8	3	YES	YES	NO	NO
CNVR_5928	16	61638155	61639420	1266	DEL	4	89	18	1	17	13	19	15	4	2	YES	YES	NO	NO
CNVR_5930	16	62197030	62198005	976	DEL	3	72	9	0	16	16	17	8	5	1	YES	YES	NO	NO
CNVR_5932	16	62390409	62392500	2092	DEL	3	38	7	0	12	3	10	4	0	2	YES	YES	NO	NO
CNVR_5945	16	63884490	63885055	566	DEL	3	41	6	0	4	10	7	7	7	0	YES	YES	NO	NO
CNVR_5950	16	64475221	64476175	955	DEL	3	29	5	0	8	7	3	5	0	1	YES	YES	NO	NO
CNVR_5951	16	64554859	64555757	899	DEL	3	50	15	0	5	6	9	8	5	2	YES	YES	NO	NO
CNVR_5957	16	65098839	65101123	2285	DEL	4	13	5	0	3	2	1	2	0	0	YES	YES	NO	NO
CNVR_5961	16	66629701	66631341	1641	DEL	4	29	11	0	7	1	7	3	0	0	YES	YES	NO	NO
CNVR_5962	16	67010101	67012890	2790	DEL	4	58	16	0	16	0	15	10	0	1	YES	YES	NO	NO
CNVR_5966	16	67775870	67776390	521	DEL	2	16	1	0	5	5	1	1	3	0	YES	YES	NO	NO
CNVR_5971	16	68477614	68479146	1533	DEL	3	85	11	0	18	26	7	12	9	2	YES	YES	NO	NO
CNVR_5974	16	68846116	68847142	1027	DEL	3	64	16	0	18	13	11	4	2	0	YES	YES	NO	NO
CNVR_5975	16	68846296	68847229	934	DEL	2	28	5	0	8	8	4	3	0	0	YES	YES	NO	NO
CNVR_5976	16	68851100	68852506	1407	DEL	3	130	21	1	22	35	21	16	12	2	YES	YES	NO	NO
CNVR_5989	16	70328952	70330385	1434	DEL	3	24	1	0	4	9	0	7	3	0	YES	YES	NO	NO
CNVR_5995	16	71583965	71584509	545	DEL	2	23	4	0	1	2	6	4	6	0	YES	YES	NO	NO
CNVR_6007	16	73662979	73666866	3888	DEL	3	79	20	0	22	7	15	10	2	3	YES	YES	NO	NO
CNVR_6014	16	74911394	74912888	1495	DEL	3	160	23	2	23	46	24	20	19	3	YES	YES	NO	NO
CNVR_6015	16	74936440	74937165	726	DEL	4	22	6	0	4	0	6	6	0	0	YES	YES	NO	NO
CNVR_6020	16	75594001	75595524	1524	DEL	3	32	5	0	14	0	6	6	0	1	YES	YES	NO	NO
CNVR_6024	16	76031240	76032262	1023	DEL	2	48	12	0	11	11	7	3	1	3	YES	YES	NO	NO
CNVR_6027	16	76301303	76302408	1106	DEL	4	83	15	0	14	25	10	11	5	3	YES	YES	NO	NO
CNVR_6032	16	76792579	76793690	1112	DEL	2	27	6	0	1	6	9	2	2	1	YES	YES	NO	NO
CNVR_6039	16	78290717	78302694	11978	DEL	2	53	16	0	15	3	11	5	0	3	YES	YES	NO	NO
CNVR_6051	16	79448751	79454500	5750	DUP	2	43	4	0	1	15	6	17	0	0	YES	YES	NO	NO
CNVR_6056	16	79652501	79655255	2755	DEL	4	96	18	1	24	18	20	11	2	2	YES	YES	NO	NO
CNVR_6058	16	79936350	79937298	949	DEL	4	30	9	0	7	1	9	0	2	2	YES	YES	NO	NO
CNVR_6062	16	80430246	80433437	3192	DEL	3	41	9	0	5	8	10	4	3	2	YES	YES	NO	NO
CNVR_6069	16	81147294	81148529	1236	DEL	3	49	10	0	10	11	6	6	4	2	YES	YES	NO	NO
CNVR_6070	16	81185353	81186063	711	DEL	2	20	4	0	5	3	3	2	3	0	YES	YES	NO	NO
CNVR_6071	16	81185429	81186063	635	DEL	3	24	3	0	5	7	2	5	2	0	YES	YES	NO	NO
CNVR_6081	17	987417	988272	856	DEL	2	16	3	0	5	0	5	2	0	1	YES	YES	NO	NO
CNVR_6085	17	1242251	1247500	5250	DEL	4	41	5	1	8	14	3	7	2	1	YES	YES	NO	NO
CNVR_6088	17	2048251	2053500	5250	DUP	2	86	13	1	19	23	10	13	5	2	YES	YES	NO	NO
CNVR_6090	17	2127377	2128842	1466	DEL	3	40	11	0	1	13	4	8	3	0	YES	YES	NO	NO
CNVR_6091	17	2331001	2333500	2500	DEL	3	89	22	0	19	13	20	11	1	3	YES	YES	NO	NO
CNVR_6093	17	2394024	2394904	881	DEL	3	90	21	0	18	23	13	7	5	3	YES	YES	NO	NO
CNVR_6095	17	2412215	2413006	792	DEL	3	34	7	0	9	7	6	4	0	1	YES	YES	NO	NO
CNVR_6105	17	3494650	3496011	1362	DEL	4	18	2	1	3	3	3	3	1	2	YES	YES	NO	NO
CNVR_6106	17	3576937	3642568	65632	DEL	2	40	16	0	7	1	8	4	4	0	YES	YES	NO	NO
CNVR_6113	17	4858991	4859405	415	DEL	3	14	3	0	2	0	2	5	2	0	YES	YES	NO	NO
CNVR_6125	17	6479751	6480801	1051	DEL	3	86	23	0	24	10	16	9	1	3	YES	YES	NO	NO
CNVR_6127	17	6544001	6548100	4100	DEL	4	84	19	2	21	11	13	8	9	1	YES	YES	NO	NO
CNVR_6128	17	6992401	6995281	2881	DEL	4	19	3	0	1	5	2	5	1	2	YES	YES	NO	NO
CNVR_6132	17	7271546	7272173	628	DEL	2	9	0	0	5	1	0	3	0	0	YES	YES	NO	NO
CNVR_6142	17	8964251	8993250	29000	DEL	4	25	0	0	1	10	1	10	3	0	YES	YES	NO	NO
CNVR_6147	17	9662560	9732439	69880	DEL	2	66	18	0	17	4	15	9	3	0	YES	YES	NO	NO
CNVR_6150	17	10939480	10941891	2412	DEL	4	33	6	0	12	5	4	5	0	1	YES	YES	NO	NO
CNVR_6153	17	11416378	11417550	1173	DEL	3	45	12	0	14	3	9	4	0	3	YES	YES	NO	NO
CNVR_6159	17	12026001	12030750	4750	DEL	3	82	23	2	14	24	13	2	1	3	YES	YES	NO	NO
CNVR_6167	17	14199251	14234519	35269	CNV	3	194	25	3	25	54	30	31	23	3	YES	YES	NO	NO
CNVR_6168	17	14203434	14206202	2769	CNV	3	89	1	3	1	39	9	23	13	0	YES	YES	NO	NO
CNVR_6170	17	14208990	14407914	198925	CNV	3	159	17	2	21	49	23	30	15	2	YES	YES	NO	NO
CNVR_6171	17	14212142	14235833	23692	DEL	3	27	3	0	0	10	2	9	3	0	YES	YES	NO	NO
CNVR_6173	17	14214211	14236934	22724	CNV	3	52	0	2	1	27	6	10	6	0	YES	YES	NO	YES
CNVR_6179	17	14966487	14967806	1320	DEL	3	98	23	0	25	11	19	13	4	3	YES	YES	NO	NO
CNVR_6186	17	15315901	15323164	7264	DEL	3	32	6	0	8	2	7	4	2	3	YES	YES	NO	NO
CNVR_6189	17	15414301	15482750	68450	DEL	3	65	18	0	22	1	17	3	1	3	YES	NO	YES	NO
CNVR_6192	17	16003654	16005482	1829	DEL	3	81	24	0	18	7	17	11	1	3	YES	YES	NO	NO
CNVR_6195	17	16564348	16565410	1063	DEL	3	24	4	0	6	5	3	2	3	1	YES	YES	NO	NO
CNVR_6196	17	16829888	16830886	999	DEL	3	132	24	1	25	26	24	16	13	3	YES	YES	NO	NO
CNVR_6200	17	18758975	18762500	3526	DEL	4	137	24	1	25	47	17	6	14	3	YES	YES	NO	NO
CNVR_6202	17	18768139	18768748	610	DEL	2	16	0	0	1	7	0	2	6	0	YES	YES	NO	NO
CNVR_6220	17	20952751	20956026	3276	DEL	4	16	1	0	5	1	4	5	0	0	YES	YES	NO	NO
CNVR_6222	17	21082966	21097500	14535	DEL	3	12	3	0	1	0	3	3	0	2	YES	YES	NO	NO
CNVR_6223	17	21103970	21104792	823	DEL	2	33	10	0	6	2	4	9	0	2	YES	YES	NO	NO
CNVR_6224	17	21231008	24003035	2772028	DEL	2	24	12	0	1	1	6	4	0	0	YES	YES	NO	NO
CNVR_6228	17	21996668	21999300	2633	DEL	4	93	11	1	21	15	22	5	15	3	YES	YES	NO	NO
CNVR_6229	17	22005601	22008250	2650	DEL	3	68	10	0	19	10	16	3	7	3	YES	YES	NO	NO
CNVR_6244	17	23077146	23078004	859	DEL	3	137	25	0	25	32	22	18	12	3	YES	YES	NO	NO
CNVR_6246	17	23579112	23580018	907	DEL	3	70	20	0	13	7	10	12	5	3	YES	YES	NO	NO
CNVR_6251	17	23791967	23793457	1491	DEL	3	50	5	1	7	17	8	11	0	1	YES	YES	NO	NO
CNVR_6253	17	23935501	23941750	6250	DEL	3	108	17	0	22	34	18	12	2	3	YES	YES	NO	NO
CNVR_6255	17	24504833	24505964	1132	DEL	3	117	22	0	25	22	23	11	11	3	YES	YES	NO	NO
CNVR_6257	17	24635422	24636769	1348	DEL	3	111	22	0	22	12	24	16	12	3	YES	YES	NO	NO
CNVR_6261	17	24954123	25543114	588992	DEL	3	24	3	0	7	0	4	8	0	2	YES	YES	NO	NO
CNVR_6266	17	25049210	25053974	4765	DEL	3	123	24	2	25	21	20	16	12	3	YES	YES	NO	NO
CNVR_6267	17	25081018	25083361	2344	DEL	3	190	25	3	25	50	34	27	23	3	YES	YES	NO	NO
CNVR_6270	17	25306424	25307603	1180	DEL	4	89	19	0	19	12	14	15	7	3	YES	YES	NO	NO
CNVR_6271	17	25310339	25312076	1738	DEL	3	40	12	0	10	4	5	6	0	3	YES	YES	NO	NO
CNVR_6273	17	25395901	25397123	1223	DEL	3	15	1	0	8	1	0	2	0	3	YES	YES	NO	NO
CNVR_6276	17	25833708	25837000	3293	DEL	4	8	0	0	0	5	0	3	0	0	YES	YES	NO	NO
CNVR_6277	17	25914001	25919611	5611	DEL	3	106	12	0	20	32	16	15	8	3	YES	YES	NO	NO
CNVR_6284	17	26894465	26895779	1315	DEL	3	35	5	0	2	9	8	5	6	0	YES	YES	NO	NO
CNVR_6287	17	27117251	27119866	2616	DEL	3	141	25	1	25	35	21	16	15	3	YES	YES	NO	NO
CNVR_6289	17	27154061	27155005	945	DEL	3	137	23	2	25	36	23	15	10	3	YES	YES	NO	NO
CNVR_6304	17	28406196	28408895	2700	DEL	2	12	6	0	2	0	2	2	0	0	YES	YES	NO	NO
CNVR_6305	17	28460984	28461654	671	DEL	3	14	3	0	4	2	2	3	0	0	YES	YES	NO	NO
CNVR_6306	17	28686751	28688299	1549	DEL	3	98	20	0	18	19	15	21	4	1	YES	YES	NO	NO
CNVR_6307	17	28803848	28805750	1903	DEL	3	32	6	0	2	9	3	9	1	2	YES	YES	NO	NO
CNVR_6310	17	29077918	29078847	930	DEL	4	70	8	0	13	18	17	11	3	0	YES	YES	NO	NO
CNVR_6319	17	30660079	30662573	2495	DEL	3	122	22	0	21	34	21	14	7	3	YES	YES	NO	NO
CNVR_6321	17	30718370	30719196	827	DEL	2	5	0	0	0	0	2	2	0	1	YES	YES	NO	NO
CNVR_6322	17	30726001	30740100	14100	DEL	3	43	14	0	14	2	7	3	0	3	YES	YES	NO	NO
CNVR_6325	17	31039487	31063633	24147	DEL	2	52	13	0	14	5	10	6	1	3	YES	YES	NO	NO
CNVR_6327	17	31126572	31142416	15845	DEL	3	15	5	0	1	4	3	2	0	0	YES	YES	NO	NO
CNVR_6331	17	31374867	31376667	1801	DEL	3	6	1	0	1	0	1	3	0	0	YES	YES	NO	NO
CNVR_6342	17	31829921	31833750	3830	DEL	4	12	2	0	1	5	0	4	0	0	YES	YES	NO	NO
CNVR_6347	17	32221801	32223847	2047	DEL	4	42	11	0	17	3	4	5	0	2	YES	YES	NO	NO
CNVR_6349	17	32755741	32757396	1656	DEL	4	13	0	0	6	0	0	7	0	0	YES	YES	NO	NO
CNVR_6366	17	35060147	35061364	1218	DEL	3	60	16	0	16	10	7	8	1	2	YES	YES	NO	NO
CNVR_6370	17	35524943	35527543	2601	DEL	4	96	22	0	21	13	21	9	7	3	YES	YES	NO	NO
CNVR_6378	17	35722536	35724043	1508	DEL	3	134	23	2	25	34	23	12	12	3	YES	YES	NO	NO
CNVR_6385	17	36860751	36863500	2750	DEL	3	113	18	0	24	24	20	14	12	1	YES	YES	NO	NO
CNVR_6387	17	36892837	36894344	1508	DEL	4	74	22	0	15	6	17	12	1	1	YES	YES	NO	NO
CNVR_6391	17	37367257	37368110	854	DEL	3	114	23	0	23	18	22	11	14	3	YES	YES	NO	NO
CNVR_6392	17	37372251	37373313	1063	DEL	3	69	20	0	17	1	18	9	3	1	YES	YES	NO	NO
CNVR_6395	17	37657001	37659039	2039	DEL	3	44	11	0	4	6	11	7	4	1	YES	YES	NO	NO
CNVR_6400	17	38313870	38315382	1513	DEL	3	87	13	0	20	34	8	10	1	1	YES	YES	NO	NO
CNVR_6402	17	38624081	38625634	1554	DEL	3	13	4	0	0	2	1	4	2	0	YES	YES	NO	NO
CNVR_6412	17	39645751	39646872	1122	DEL	3	75	5	1	15	22	9	12	10	1	YES	YES	NO	NO
CNVR_6413	17	39871001	39887250	16250	DEL	3	16	2	0	1	5	1	4	2	1	YES	YES	NO	NO
CNVR_6416	17	40154904	40157200	2297	DEL	4	16	6	0	1	1	4	4	0	0	YES	YES	NO	NO
CNVR_6417	17	40180008	40180778	771	DEL	3	51	11	0	14	9	9	7	0	1	YES	YES	NO	NO
CNVR_6419	17	40300498	40301854	1357	DEL	3	161	25	1	25	43	23	25	16	3	YES	YES	NO	NO
CNVR_6433	17	41500204	41501760	1557	DEL	3	48	10	0	3	17	15	1	2	0	YES	YES	NO	NO
CNVR_6437	17	41565956	41567250	1295	DEL	3	19	7	0	6	2	2	2	0	0	YES	YES	NO	NO
CNVR_6440	17	41820251	41825000	4750	DEL	3	94	10	0	20	23	19	14	7	1	YES	YES	NO	NO
CNVR_6452	17	43314901	43317834	2934	DEL	4	44	10	1	4	2	12	13	2	0	YES	YES	NO	NO
CNVR_6453	17	43323979	43324918	940	DEL	3	71	20	1	11	10	12	12	3	2	YES	YES	NO	NO
CNVR_6455	17	43333751	43337000	3250	DEL	4	17	1	0	0	0	7	9	0	0	YES	YES	NO	NO
CNVR_6466	17	44863349	44865118	1770	DEL	3	138	24	1	25	28	21	21	15	3	YES	YES	NO	NO
CNVR_6468	17	44929930	44931471	1542	DEL	3	24	4	0	9	0	5	4	0	2	YES	YES	NO	NO
CNVR_6470	17	45172443	45174250	1808	DEL	2	16	1	0	6	0	4	3	0	2	YES	YES	NO	NO
CNVR_6472	17	45211353	45212601	1249	DEL	4	61	9	0	12	8	15	8	6	3	YES	YES	NO	NO
CNVR_6483	17	47732899	47734087	1189	DEL	3	84	18	1	18	15	11	13	5	3	YES	YES	NO	NO
CNVR_6486	17	47965411	47966350	940	DEL	4	44	9	1	15	4	5	6	3	1	YES	YES	NO	NO
CNVR_6487	17	48050101	48051750	1650	DEL	4	79	17	1	10	15	12	16	5	3	YES	YES	NO	NO
CNVR_6493	17	49598016	49602000	3985	DEL	4	15	2	0	6	0	3	4	0	0	YES	YES	NO	NO
CNVR_6494	17	49638846	49640083	1238	DEL	3	95	22	1	23	15	19	10	2	3	YES	YES	NO	NO
CNVR_6496	17	50580306	51718233	1137928	CNV	3	91	1	3	0	39	9	23	16	0	YES	YES	NO	YES
CNVR_6497	17	50610906	50836379	225474	CNV	3	30	2	2	0	4	4	9	8	1	YES	YES	NO	YES
CNVR_6512	17	51605251	51667750	62500	CNV	4	38	0	1	0	18	1	14	4	0	YES	YES	NO	YES
CNVR_6516	17	51715716	51720014	4299	DEL	3	2	0	0	0	0	0	2	0	0	YES	YES	NO	NO
CNVR_6522	17	52637649	52639520	1872	DEL	4	37	3	1	7	10	8	2	3	3	YES	YES	NO	NO
CNVR_6524	17	52851955	52853433	1479	DEL	3	107	20	0	20	25	14	17	8	3	YES	YES	NO	NO
CNVR_6527	17	53814751	53822250	7500	DEL	3	172	25	2	25	46	27	27	17	3	YES	YES	NO	NO
CNVR_6528	17	53859965	53898636	38672	DEL	3	63	8	0	11	22	9	10	2	1	YES	YES	NO	NO
CNVR_6541	17	57596483	57650196	53714	DEL	3	94	22	0	14	13	14	20	9	2	YES	YES	NO	NO
CNVR_6545	17	58577614	58579096	1483	DEL	3	42	17	0	3	1	12	9	0	0	YES	YES	NO	NO
CNVR_6546	17	58587251	58591750	4500	DEL	4	96	16	1	18	17	13	19	10	2	YES	YES	NO	NO
CNVR_6547	17	58616905	58618005	1101	DEL	4	65	14	0	9	12	14	8	6	2	YES	YES	NO	NO
CNVR_6549	17	58907532	58908646	1115	DEL	3	85	19	0	22	12	19	9	1	3	YES	YES	NO	NO
CNVR_6560	17	61332416	61333579	1164	DEL	3	90	24	0	17	13	21	8	5	2	YES	YES	NO	NO
CNVR_6585	17	70098901	70121700	22800	DEL	3	28	5	0	11	3	3	3	0	3	YES	YES	NO	NO
CNVR_6587	17	70349975	70350833	859	DEL	3	137	24	1	25	35	21	19	9	3	YES	YES	NO	NO
CNVR_6589	17	70642482	70643250	769	DEL	3	41	13	0	6	6	9	5	1	1	YES	YES	NO	NO
CNVR_6602	17	72514751	72532500	17750	DEL	3	137	24	1	25	36	22	16	10	3	YES	YES	NO	NO
CNVR_6607	17	72818788	72930925	112138	DEL	2	23	7	0	2	4	4	5	0	1	YES	YES	NO	NO
CNVR_6609	17	72840078	72840791	714	DEL	2	17	2	0	2	6	0	5	2	0	YES	YES	NO	NO
CNVR_6614	17	72860964	72874857	13894	DEL	2	10	1	0	2	2	0	5	0	0	YES	YES	NO	NO
CNVR_6618	17	72924500	72960714	36215	DEL	2	5	0	0	0	0	2	3	0	0	YES	YES	NO	NO
CNVR_6621	17	73026450	73027413	964	DEL	3	74	17	0	17	18	5	10	4	3	YES	YES	NO	NO
CNVR_6631	17	73473129	73474844	1716	DEL	3	102	22	1	21	18	21	10	6	3	YES	YES	NO	NO
CNVR_6635	17	74649597	74650380	784	DEL	3	113	22	1	24	21	20	16	6	3	YES	YES	NO	NO
CNVR_6636	17	74660800	74661733	934	DEL	3	103	22	0	24	17	20	13	4	3	YES	YES	NO	NO
CNVR_6644	18	214931	216500	1570	DEL	3	13	6	0	2	0	1	4	0	0	YES	YES	NO	NO
CNVR_6645	18	402708	405750	3043	DEL	3	53	16	0	14	12	5	4	1	1	YES	YES	NO	NO
CNVR_6650	18	1053417	1055100	1684	DEL	4	128	25	0	20	32	21	16	11	3	YES	YES	NO	NO
CNVR_6651	18	1190618	1191186	569	DEL	2	27	7	0	1	5	4	6	2	2	YES	YES	NO	NO
CNVR_6657	18	1420574	1421775	1202	DEL	3	94	14	1	18	16	21	14	8	2	YES	YES	NO	NO
CNVR_6659	18	1554242	1554760	519	DEL	2	6	0	0	1	0	2	3	0	0	YES	YES	NO	NO
CNVR_6661	18	2516267	2517763	1497	DEL	3	83	20	0	16	8	17	13	6	3	YES	YES	NO	NO
CNVR_6662	18	2662416	2676580	14165	DEL	2	21	1	0	4	4	2	5	4	1	YES	YES	NO	NO
CNVR_6682	18	5542258	5542844	587	DEL	3	22	7	0	1	0	5	5	3	1	YES	YES	NO	NO
CNVR_6694	18	7449451	7451561	2111	DEL	4	88	18	1	18	3	18	24	4	2	YES	YES	NO	NO
CNVR_6695	18	7516620	7517572	953	DEL	3	87	21	0	19	16	18	5	6	2	YES	YES	NO	NO
CNVR_6700	18	8993503	8995460	1958	DEL	3	140	22	0	21	46	15	22	12	2	YES	YES	NO	NO
CNVR_6704	18	10059501	10060939	1439	DEL	3	113	19	0	21	29	19	13	9	3	YES	YES	NO	NO
CNVR_6705	18	10107581	10108882	1302	DEL	4	119	20	0	23	31	20	15	7	3	YES	YES	NO	NO
CNVR_6707	18	10232293	10233072	780	DEL	3	19	2	0	6	1	6	3	0	1	YES	YES	NO	NO
CNVR_6708	18	10526551	10528270	1720	DEL	3	114	24	1	25	20	19	12	10	3	YES	YES	NO	NO
CNVR_6709	18	10677576	10678564	989	DEL	3	56	15	0	14	4	12	7	1	3	YES	YES	NO	NO
CNVR_6710	18	10685501	10686620	1120	DEL	3	20	2	0	9	1	4	3	0	1	YES	YES	NO	NO
CNVR_6716	18	13361001	13441037	80037	DUP	2	1	0	0	1	0	0	0	0	0	NO	NO	YES	NO
CNVR_6728	18	15304251	15309000	4750	DEL	3	8	0	0	0	5	0	3	0	0	YES	YES	NO	NO
CNVR_6730	18	15506516	21364612	5858097	DEL	2	22	2	0	3	7	2	8	0	0	YES	YES	NO	NO
CNVR_6732	18	15543692	15545500	1809	DEL	2	5	0	0	0	1	0	4	0	0	YES	YES	NO	NO
CNVR_6747	18	17630041	17631644	1604	DEL	4	57	17	0	13	5	5	11	4	2	YES	YES	NO	NO
CNVR_6749	18	17739146	17741045	1900	DEL	3	99	21	0	10	28	17	8	12	3	YES	YES	NO	NO
CNVR_6756	18	19322135	19322503	369	DEL	3	13	0	0	0	5	1	4	3	0	YES	YES	NO	NO
CNVR_6764	18	21258352	21678026	419675	DEL	3	82	16	0	9	30	8	8	9	2	YES	YES	NO	NO
CNVR_6771	18	23176584	23184225	7642	DEL	3	125	25	0	25	25	22	15	10	3	YES	YES	NO	NO
CNVR_6778	18	25224434	25225602	1169	DEL	4	112	25	0	25	21	20	14	4	3	YES	YES	NO	NO
CNVR_6781	18	26177174	26217953	40780	DEL	2	7	0	0	0	3	1	1	2	0	YES	YES	NO	NO
CNVR_6782	18	26177235	26178796	1562	DEL	3	99	15	0	16	34	13	8	10	3	YES	YES	NO	NO
CNVR_6785	18	26310078	26310560	483	DEL	3	34	4	0	6	8	8	6	1	1	YES	YES	NO	NO
CNVR_6788	18	26701973	26703400	1428	DEL	4	74	8	1	19	19	11	13	2	1	YES	YES	NO	NO
CNVR_6789	18	26846627	26847515	889	DEL	4	73	17	0	15	11	12	13	2	3	YES	YES	NO	NO
CNVR_6790	18	27050444	27051117	674	DEL	3	87	16	0	18	19	20	8	4	2	YES	YES	NO	NO
CNVR_6791	18	27050552	27051117	566	DEL	3	63	14	0	14	10	16	6	1	2	YES	YES	NO	NO
CNVR_6793	18	27238251	27239604	1354	DEL	3	42	7	0	14	0	6	12	2	1	YES	YES	NO	NO
CNVR_6795	18	27335119	27447090	111972	DEL	2	23	10	0	4	0	6	3	0	0	YES	YES	NO	NO
CNVR_6796	18	27372447	27373265	819	DEL	4	29	12	0	8	0	4	5	0	0	YES	YES	NO	NO
CNVR_6798	18	27775751	27788750	13000	DEL	3	51	5	0	6	9	5	18	5	3	YES	YES	NO	NO
CNVR_6799	18	28122395	28123930	1536	DEL	4	95	22	2	21	9	16	15	7	3	YES	YES	NO	NO
CNVR_6807	18	28738712	28740510	1799	DEL	3	73	14	0	5	11	17	13	13	0	YES	YES	NO	NO
CNVR_6808	18	28751548	28753554	2007	DEL	4	35	10	0	3	2	14	6	0	0	YES	YES	NO	NO
CNVR_6818	18	29231014	29231666	653	DEL	3	69	17	0	17	13	8	10	3	1	YES	YES	NO	NO
CNVR_6822	18	30051779	30052328	550	DEL	3	9	3	0	1	1	1	3	0	0	YES	YES	NO	NO
CNVR_6827	18	30722285	30722774	490	DEL	3	23	2	0	3	10	0	6	1	1	YES	YES	NO	NO
CNVR_6829	18	30741310	30742568	1259	DEL	4	114	21	1	25	23	21	15	5	3	YES	YES	NO	NO
CNVR_6836	18	31457302	31458792	1491	DEL	3	25	4	0	6	0	3	3	8	1	YES	YES	NO	NO
CNVR_6838	18	31645537	31646145	609	DEL	2	11	0	0	1	1	3	4	2	0	YES	YES	NO	NO
CNVR_6842	18	31977501	31981175	3675	DEL	4	88	21	1	9	25	12	8	9	3	YES	YES	NO	NO
CNVR_6845	18	32469231	32469878	648	DEL	3	23	4	0	3	2	2	7	4	1	YES	YES	NO	NO
CNVR_6846	18	32491756	32492775	1020	DEL	2	14	3	0	7	0	0	3	0	1	YES	YES	NO	NO
CNVR_6849	18	33410251	33413750	3500	DEL	3	128	24	0	25	23	25	20	8	3	YES	YES	NO	NO
CNVR_6850	18	33767884	33769053	1170	DEL	4	45	1	0	7	19	1	13	3	1	YES	YES	NO	NO
CNVR_6852	18	33903681	33904497	817	DEL	3	8	0	0	1	0	0	7	0	0	YES	YES	NO	NO
CNVR_6854	18	33978215	33979876	1662	DEL	3	47	6	0	3	10	5	13	10	0	YES	YES	NO	NO
CNVR_6858	18	34444142	34446479	2338	DEL	3	34	8	1	4	6	4	6	3	2	YES	YES	NO	NO
CNVR_6860	18	37218612	37219330	719	DEL	3	3	0	0	0	0	0	3	0	0	YES	YES	NO	NO
CNVR_6862	18	38043896	38046457	2562	DEL	2	86	24	0	22	9	18	8	2	3	YES	YES	NO	NO
CNVR_6865	18	38534283	38534978	696	DEL	3	33	7	0	3	9	4	6	4	0	YES	YES	NO	NO
CNVR_6871	18	39955865	39957470	1606	DEL	3	85	19	0	16	13	20	7	8	2	YES	YES	NO	NO
CNVR_6874	18	41007167	41008028	862	DEL	4	76	18	1	16	12	13	11	2	3	YES	YES	NO	NO
CNVR_6880	18	42888001	42896048	8048	DEL	3	48	12	0	10	5	6	9	4	2	YES	YES	NO	NO
CNVR_6881	18	43810730	43833000	22271	DUP	2	25	6	0	7	1	6	4	0	1	YES	YES	NO	NO
CNVR_6888	18	44052586	44053548	963	DEL	3	136	24	3	22	34	20	19	12	2	YES	YES	NO	NO
CNVR_6896	18	45370439	45418638	48200	DEL	2	30	3	0	4	6	8	7	2	0	YES	YES	NO	NO
CNVR_6902	18	45619501	45621612	2112	DEL	4	40	4	0	7	8	11	7	2	1	YES	YES	NO	NO
CNVR_6909	18	46505707	46506479	773	DEL	2	24	4	0	3	7	5	5	0	0	YES	YES	NO	NO
CNVR_6914	18	47103782	47107531	3750	DEL	3	47	8	0	9	14	1	14	1	0	YES	YES	NO	NO
CNVR_6919	18	47493667	47503125	9459	DEL	3	5	0	0	0	0	0	4	1	0	YES	YES	NO	NO
CNVR_6920	18	47623850	47626304	2455	DEL	3	166	20	3	23	52	26	27	12	3	YES	YES	NO	NO
CNVR_6922	18	47759021	47759911	891	DEL	2	44	13	0	16	1	7	5	0	2	YES	YES	NO	NO
CNVR_6923	18	47987251	48005750	18500	DEL	4	73	13	1	10	16	13	9	9	2	YES	YES	NO	NO
CNVR_6929	18	49082678	49083698	1021	DEL	3	3	0	0	0	0	0	3	0	0	YES	YES	NO	NO
CNVR_6933	18	50006078	50006942	865	DEL	3	50	10	0	15	3	12	4	4	2	YES	YES	NO	NO
CNVR_6952	18	51001377	51119449	118073	DEL	3	82	22	0	22	7	15	10	3	3	YES	YES	NO	NO
CNVR_6955	18	51036230	51048777	12548	DEL	2	70	18	0	22	2	14	10	1	3	YES	YES	NO	NO
CNVR_6961	18	51076171	51077099	929	DEL	2	53	13	0	18	1	11	7	0	3	YES	YES	NO	NO
CNVR_6962	18	51090528	51106645	16118	DEL	2	18	4	0	5	1	3	5	0	0	YES	YES	NO	NO
CNVR_6968	18	51747694	51775750	28057	DEL	3	36	4	0	6	12	5	5	2	2	YES	YES	YES	NO
CNVR_6969	18	51755167	51780739	25573	CNV	3	14	0	1	0	1	3	7	2	0	YES	YES	NO	NO
CNVR_6975	18	52517128	52518401	1274	CNV	3	18	3	0	9	1	0	3	1	1	YES	YES	NO	NO
CNVR_6980	18	53351501	53376500	25000	DEL	4	29	4	0	0	15	0	9	1	0	YES	YES	NO	NO
CNVR_6987	18	57566026	57570546	4521	CNV	3	28	3	0	2	6	4	11	2	0	YES	YES	NO	NO
CNVR_6989	18	57568586	57570600	2015	DEL	2	9	1	0	0	0	2	6	0	0	YES	YES	NO	NO
CNVR_6991	18	57651737	57731735	79999	DEL	3	23	0	2	0	10	1	7	3	0	YES	NO	YES	NO
CNVR_7005	18	58284485	58285067	583	DEL	3	19	2	0	0	7	3	2	3	2	YES	YES	NO	NO
CNVR_7024	18	59163599	59367219	203621	DEL	3	32	7	0	8	3	5	3	4	2	YES	YES	NO	NO
CNVR_7034	18	59684042	59983585	299544	DEL	2	97	10	2	9	30	15	17	12	2	YES	YES	NO	NO
CNVR_7047	18	60070310	60071078	769	DEL	2	29	3	0	8	8	2	5	3	0	YES	YES	NO	NO
CNVR_7053	18	60390751	60392115	1365	DEL	3	25	8	0	4	0	4	7	0	2	YES	YES	NO	NO
CNVR_7075	18	60870598	60974512	103915	DEL	2	39	7	0	10	3	9	8	1	1	YES	YES	NO	NO
CNVR_7082	18	61232270	61302688	70419	DEL	3	32	14	0	5	4	2	4	2	1	YES	YES	NO	NO
CNVR_7089	18	61323001	61324682	1682	DEL	3	19	2	0	5	0	7	4	0	1	YES	YES	NO	NO
CNVR_7090	18	61323052	61403495	80444	DEL	3	18	2	1	5	1	0	3	5	1	YES	YES	NO	NO
CNVR_7091	18	61324362	61341144	16783	DEL	2	42	11	0	12	3	11	3	0	2	YES	YES	NO	NO
CNVR_7094	18	61405375	61754952	349578	DEL	3	11	1	0	0	1	2	3	4	0	YES	YES	YES	NO
CNVR_7098	18	61479703	61494600	14898	DEL	4	33	5	0	7	0	12	8	0	1	YES	YES	NO	NO
CNVR_7103	18	61648574	61844986	196413	DEL	3	26	10	0	4	1	4	3	1	3	YES	YES	NO	NO
CNVR_7107	18	61813356	61819844	6489	DEL	4	45	16	0	8	5	6	5	5	0	YES	YES	NO	NO
CNVR_7108	18	61823251	61824741	1491	DEL	3	26	11	0	1	1	4	5	4	0	YES	YES	NO	NO
CNVR_7119	18	62928995	62930500	1506	DEL	4	130	24	0	22	30	18	19	14	3	YES	YES	NO	NO
CNVR_7133	18	63632094	63632962	869	DEL	2	19	4	0	5	1	5	3	0	1	YES	YES	NO	NO
CNVR_7134	18	63633274	63635612	2339	DEL	3	88	22	0	24	12	15	11	1	3	YES	YES	NO	NO
CNVR_7139	18	63758100	63786028	27929	DEL	2	8	3	0	1	0	0	4	0	0	YES	YES	NO	NO
CNVR_7143	18	63783656	63799154	15499	DEL	2	27	8	0	9	0	5	3	0	2	YES	YES	NO	NO
CNVR_7144	18	63787130	63817062	29933	CNV	3	39	5	1	1	16	2	9	4	1	YES	YES	NO	NO
CNVR_7154	18	64060146	64062700	2555	DEL	3	60	14	0	17	2	16	8	2	1	YES	YES	NO	NO
CNVR_7158	18	64589810	64622141	32332	DEL	2	79	20	0	24	8	15	8	1	3	YES	YES	NO	NO
CNVR_7161	18	65099244	65102411	3168	DEL	2	32	7	0	8	1	10	3	0	3	YES	YES	NO	NO
CNVR_7163	18	65215038	65216602	1565	DEL	2	27	9	0	10	0	4	3	0	1	YES	YES	NO	NO
CNVR_7165	18	65292632	65294595	1964	DEL	4	50	12	0	14	0	10	9	4	1	YES	YES	NO	NO
CNVR_7174	18	65780313	65781946	1634	DEL	3	45	13	0	11	4	5	12	0	0	YES	YES	NO	NO
CNVR_7175	18	65784248	65785901	1654	DEL	3	11	3	0	0	0	0	8	0	0	YES	YES	NO	NO
CNVR_7191	19	1259171	1260328	1158	DEL	4	162	25	0	24	48	23	25	14	3	YES	YES	NO	NO
CNVR_7193	19	1498422	1499774	1353	DEL	4	80	17	0	15	12	15	16	4	1	YES	YES	NO	NO
CNVR_7196	19	1678240	1679316	1077	DEL	3	24	7	0	5	3	3	6	0	0	YES	YES	NO	NO
CNVR_7197	19	1760601	1762104	1504	DEL	3	154	24	2	25	45	22	18	15	3	YES	YES	NO	NO
CNVR_7207	19	2132600	2133558	959	DEL	2	44	11	0	13	1	12	4	0	3	YES	YES	NO	NO
CNVR_7213	19	2586545	2608000	21456	DEL	2	2	0	0	0	0	0	2	0	0	YES	YES	NO	NO
CNVR_7215	19	2648101	2651500	3400	DEL	4	68	18	0	20	5	13	8	2	2	YES	YES	NO	NO
CNVR_7216	19	2685751	2688042	2292	DEL	4	87	11	1	16	20	17	15	7	0	YES	YES	NO	NO
CNVR_7220	19	2782041	2782744	704	DEL	3	39	9	0	6	5	11	7	1	0	YES	YES	NO	NO
CNVR_7222	19	2876501	2881250	4750	DEL	3	71	16	0	22	5	14	7	4	3	YES	YES	NO	NO
CNVR_7224	19	2984783	4317779	1332997	DEL	2	48	13	0	14	12	5	2	2	0	YES	YES	NO	NO
CNVR_7230	19	3488295	3512034	23740	DEL	3	66	17	0	19	5	15	6	1	3	YES	YES	NO	NO
CNVR_7231	19	3583751	3585303	1553	DEL	4	57	9	0	14	15	12	2	3	2	YES	YES	NO	NO
CNVR_7232	19	3615901	3618012	2112	DEL	3	33	6	0	12	2	6	4	0	3	YES	YES	NO	NO
CNVR_7233	19	3713032	3714762	1731	DEL	3	20	3	0	5	3	1	5	3	0	YES	YES	NO	NO
CNVR_7234	19	3729251	3766000	36750	DEL	3	67	0	2	0	35	0	19	11	0	YES	YES	NO	NO
CNVR_7236	19	3947501	3979500	32000	DEL	3	11	0	0	0	6	0	5	0	0	YES	YES	NO	NO
CNVR_7238	19	4061415	4062409	995	DEL	3	91	19	0	16	15	19	12	7	3	YES	YES	NO	NO
CNVR_7243	19	4192920	4194500	1581	DEL	3	99	20	2	19	12	18	16	9	3	YES	YES	NO	NO
CNVR_7246	19	4512347	4515000	2654	DEL	3	166	25	2	24	46	22	26	18	3	YES	YES	NO	NO
CNVR_7249	19	4861120	4862210	1091	DEL	3	90	22	1	22	9	18	11	4	3	YES	YES	NO	NO
CNVR_7251	19	5100461	5102105	1645	DEL	3	14	2	0	4	0	2	4	0	2	YES	YES	NO	NO
CNVR_7252	19	5413688	5483400	69713	DEL	3	4	0	0	0	0	4	0	0	0	NO	NO	YES	NO
CNVR_7253	19	6108893	6110802	1910	DEL	3	76	17	0	13	12	16	12	3	3	YES	YES	NO	NO
CNVR_7254	19	6253671	6422445	168775	DEL	3	27	6	0	5	7	3	5	1	0	YES	YES	NO	NO
CNVR_7261	19	6912238	6913556	1319	DEL	4	106	25	0	24	17	19	14	4	3	YES	YES	NO	NO
CNVR_7269	19	8733501	8737500	4000	DEL	3	25	3	1	5	5	4	5	1	1	YES	YES	NO	NO
CNVR_7274	19	9339901	9347750	7850	DEL	4	120	21	0	24	33	19	11	10	2	YES	YES	NO	NO
CNVR_7281	19	13018166	13018826	661	DEL	3	6	0	0	1	1	0	3	0	1	YES	YES	NO	NO
CNVR_7283	19	14494579	14505428	10850	DEL	2	22	6	0	5	1	5	4	0	1	YES	YES	NO	NO
CNVR_7285	19	14611964	14614250	2287	DEL	4	95	18	0	21	7	20	16	10	3	YES	YES	NO	NO
CNVR_7287	19	14660493	14663311	2819	DEL	4	20	2	0	6	0	3	8	0	1	YES	YES	NO	NO
CNVR_7293	19	15259773	15260500	728	DEL	3	6	0	0	1	0	1	4	0	0	YES	YES	NO	NO
CNVR_7296	19	16115455	16117432	1978	DEL	2	80	21	0	20	9	16	10	2	2	YES	YES	NO	NO
CNVR_7298	19	16460501	16464000	3500	DEL	3	46	12	0	11	8	7	4	2	2	YES	YES	NO	NO
CNVR_7303	19	16753989	16755676	1688	DEL	3	51	13	0	7	13	13	2	1	2	YES	YES	NO	NO
CNVR_7306	19	17046553	17047155	603	DEL	3	17	2	0	5	2	3	3	0	2	YES	YES	NO	NO
CNVR_7309	19	17729241	17730345	1105	DEL	3	4	0	0	0	0	0	4	0	0	YES	YES	NO	NO
CNVR_7310	19	18108338	18109687	1350	DEL	3	79	15	0	20	17	16	6	3	2	YES	YES	NO	NO
CNVR_7312	19	18278758	18279445	688	DEL	3	78	20	2	6	17	15	10	5	3	YES	YES	NO	NO
CNVR_7340	19	21705140	21707250	2111	DEL	4	79	15	0	21	21	8	8	3	3	YES	YES	NO	NO
CNVR_7343	19	22526947	22527946	1000	DEL	3	102	21	0	25	17	16	12	8	3	YES	YES	NO	NO
CNVR_7367	19	24755106	24761874	6769	DEL	3	23	4	0	2	5	0	9	3	0	YES	YES	NO	NO
CNVR_7373	19	26366001	26372000	6000	DEL	3	88	13	0	23	11	19	17	3	2	YES	YES	NO	NO
CNVR_7374	19	26416751	26419025	2275	DEL	3	15	0	0	0	7	0	7	1	0	YES	YES	NO	NO
CNVR_7387	19	30324651	30325638	988	DEL	4	24	0	0	9	0	0	13	0	2	YES	YES	NO	NO
CNVR_7399	19	35080319	35081193	875	DEL	2	33	7	0	7	3	8	7	0	1	YES	YES	NO	NO
CNVR_7402	19	35923251	35947750	24500	DEL	3	26	0	0	0	13	0	11	2	0	YES	YES	NO	NO
CNVR_7408	19	37214111	37214876	766	DEL	3	33	6	0	2	5	10	6	3	1	YES	YES	NO	NO
CNVR_7417	19	41129245	41130273	1029	DEL	3	23	12	0	2	3	3	3	0	0	YES	YES	NO	NO
CNVR_7420	19	41874711	41876606	1896	DEL	3	109	24	2	20	23	14	12	11	3	YES	YES	NO	NO
CNVR_7424	19	42195001	42196354	1354	DEL	4	40	8	0	11	8	6	5	2	0	YES	YES	NO	NO
CNVR_7425	19	42197903	42198706	804	DEL	4	67	14	1	11	12	14	7	8	0	YES	YES	NO	NO
CNVR_7429	19	42587572	42588331	760	DEL	3	32	7	0	7	5	7	4	1	1	YES	YES	NO	NO
CNVR_7445	19	43877113	43902008	24896	DEL	2	5	0	0	0	2	0	2	0	1	YES	YES	NO	NO
CNVR_7453	19	43950988	43954342	3355	DEL	3	86	20	0	23	12	16	9	3	3	YES	YES	NO	NO
CNVR_7454	19	43957251	43975750	18500	DEL	4	53	0	1	0	30	0	15	7	0	YES	YES	NO	NO
CNVR_7466	19	45605251	45612500	7250	DEL	3	18	5	0	3	1	5	3	0	1	YES	YES	NO	NO
CNVR_7467	19	45668907	45669674	768	DEL	2	12	0	0	1	5	0	3	3	0	YES	YES	NO	NO
CNVR_7473	19	47111185	47138790	27606	DEL	3	16	2	0	3	1	5	5	0	0	YES	YES	NO	NO
CNVR_7475	19	47300040	47305817	5778	DEL	2	33	10	0	12	2	4	2	1	2	YES	YES	NO	NO
CNVR_7476	19	47301484	47303278	1795	DEL	3	77	18	0	20	10	15	6	5	3	YES	YES	NO	NO
CNVR_7481	19	47753964	47754825	862	DEL	3	14	3	0	4	0	0	7	0	0	YES	YES	NO	NO
CNVR_7484	19	48766485	48767616	1132	DEL	3	35	14	0	6	3	5	2	4	1	YES	YES	NO	NO
CNVR_7486	19	48862856	48896620	33765	DEL	3	56	7	0	12	6	11	10	8	2	YES	YES	NO	NO
CNVR_7487	19	48873786	48894435	20650	CNV	3	50	7	0	14	5	8	10	3	3	YES	YES	NO	NO
CNVR_7498	19	50861101	51059740	198640	CNV	2	33	4	1	1	15	1	5	5	1	YES	YES	NO	NO
CNVR_7502	19	50897682	50940635	42954	CNV	2	9	2	0	2	0	1	3	1	0	YES	YES	NO	YES
CNVR_7510	19	51052674	51140179	87506	DEL	2	17	0	0	9	2	0	6	0	0	YES	YES	NO	NO
CNVR_7511	19	51108608	51109992	1385	DEL	3	13	3	0	4	0	1	4	0	1	YES	YES	NO	NO
CNVR_7522	19	52743759	52911513	167755	DEL	3	29	3	0	4	7	4	7	3	1	YES	YES	NO	NO
CNVR_7524	19	52906278	52907020	743	DEL	3	50	9	1	10	10	8	9	1	2	YES	YES	NO	NO
CNVR_7531	19	54499653	54500727	1075	DEL	3	5	1	0	0	1	0	2	1	0	YES	YES	NO	NO
CNVR_7533	19	55738122	55743612	5491	DEL	3	56	16	0	15	9	6	5	3	2	YES	YES	NO	NO
CNVR_7535	19	56836944	56838189	1246	DEL	4	76	17	0	20	12	17	7	1	2	YES	YES	NO	NO
CNVR_7537	19	57470615	57484195	13581	DEL	3	45	6	0	9	9	8	7	4	2	YES	YES	NO	NO
CNVR_7546	19	57851160	57860847	9688	DEL	2	33	0	0	5	7	3	13	4	1	YES	YES	NO	NO
CNVR_7547	19	57864672	57868000	3329	DEL	3	16	1	0	6	1	3	3	2	0	YES	YES	NO	NO
CNVR_7552	19	58968124	58968757	634	DEL	2	5	0	0	1	1	0	3	0	0	YES	YES	NO	NO
CNVR_7566	19	62018501	62026000	7500	DEL	3	5	0	0	0	1	0	4	0	0	YES	YES	NO	NO
CNVR_7569	19	62347608	62406023	58416	DEL	2	73	17	0	22	9	16	6	0	3	YES	YES	NO	NO
CNVR_7578	19	63277861	63278706	846	DEL	2	33	4	0	9	5	6	7	1	1	YES	YES	NO	NO
CNVR_7580	19	63340751	63352800	12050	DEL	4	9	0	0	0	1	4	4	0	0	YES	YES	NO	NO
CNVR_7581	19	63396985	63397823	839	DEL	2	38	10	0	7	12	3	4	2	0	YES	YES	NO	NO
CNVR_7591	2	146240	149400	3161	DEL	4	43	6	0	8	1	15	5	7	1	YES	YES	NO	NO
CNVR_7592	2	598751	600168	1418	DEL	3	85	23	0	12	3	25	15	6	1	YES	YES	NO	NO
CNVR_7595	2	1348718	1350750	2033	DEL	3	113	16	1	23	41	7	17	7	1	YES	YES	NO	NO
CNVR_7605	2	2845208	2847162	1955	DEL	3	48	10	0	9	12	4	5	7	1	YES	YES	NO	NO
CNVR_7608	2	3736055	3737018	964	DEL	2	22	5	0	5	0	6	6	0	0	YES	YES	NO	NO
CNVR_7613	2	5093435	5094124	690	DEL	3	13	0	0	4	2	1	4	1	1	YES	YES	NO	NO
CNVR_7614	2	5300648	5302250	1603	DEL	4	68	20	0	16	9	2	15	3	3	YES	YES	NO	NO
CNVR_7617	2	5455414	5457624	2211	DEL	4	82	22	1	15	17	2	16	7	2	YES	YES	NO	NO
CNVR_7619	2	5706778	7047584	1340807	DEL	2	13	0	0	1	3	0	5	1	3	YES	YES	NO	NO
CNVR_7623	2	6051501	6053735	2235	DEL	4	51	24	0	4	13	0	5	3	2	YES	YES	NO	NO
CNVR_7624	2	6098225	6099029	805	DEL	3	32	2	0	11	7	0	7	4	1	YES	YES	NO	NO
CNVR_7625	2	6130550	6131719	1170	DEL	3	57	22	0	8	3	16	4	3	1	YES	YES	NO	NO
CNVR_7630	2	6606320	6607833	1514	DEL	3	35	0	1	10	15	0	4	3	2	YES	YES	NO	NO
CNVR_7631	2	6639385	6640008	624	DEL	3	44	13	0	8	10	0	7	5	1	YES	YES	NO	NO
CNVR_7632	2	6759001	6761750	2750	DEL	3	5	0	0	0	0	0	5	0	0	YES	YES	NO	NO
CNVR_7634	2	6869374	6870033	660	DEL	3	29	7	0	1	7	4	3	6	1	YES	YES	NO	NO
CNVR_7647	2	8562751	8563700	950	DEL	3	30	4	0	10	3	0	12	0	1	YES	YES	NO	NO
CNVR_7648	2	8649751	8656500	6750	DEL	4	34	19	0	0	15	0	0	0	0	YES	YES	NO	NO
CNVR_7651	2	8920809	8921513	705	DEL	3	62	8	0	7	14	24	5	2	2	YES	YES	NO	NO
CNVR_7662	2	10525024	10525595	572	DEL	3	36	2	0	6	1	14	8	5	0	YES	YES	NO	NO
CNVR_7666	2	11076127	11085470	9344	DEL	2	5	0	0	1	0	0	3	0	1	YES	YES	NO	NO
CNVR_7671	2	11526131	11528007	1877	DEL	3	48	3	0	10	17	3	10	4	1	YES	YES	NO	NO
CNVR_7686	2	12291067	12292022	956	DEL	3	118	20	1	24	14	26	16	14	3	YES	YES	NO	NO
CNVR_7691	2	13103401	13113250	9850	DEL	2	5	2	0	0	0	1	2	0	0	YES	YES	NO	NO
CNVR_7692	2	13217053	13217746	694	DEL	3	34	4	0	8	8	2	7	3	2	YES	YES	NO	NO
CNVR_7703	2	14995824	14997344	1521	DEL	4	42	5	2	6	18	1	8	2	0	YES	YES	NO	NO
CNVR_7705	2	15392007	15392857	851	DEL	3	143	22	1	25	38	24	21	9	3	YES	YES	NO	NO
CNVR_7716	2	16558603	16560069	1467	DEL	3	145	24	1	25	34	21	23	14	3	YES	YES	NO	NO
CNVR_7726	2	18103221	18104487	1267	DEL	3	122	21	1	21	27	17	22	10	3	YES	YES	NO	NO
CNVR_7752	2	24010689	24012762	2074	DEL	4	40	7	0	12	3	5	9	3	1	YES	YES	NO	NO
CNVR_7755	2	24201400	24202021	622	DEL	3	27	3	1	4	6	7	3	1	2	YES	YES	NO	NO
CNVR_7760	2	24940440	24944422	3983	DEL	4	32	6	0	5	8	6	5	0	2	YES	YES	NO	NO
CNVR_7778	2	28330488	28331690	1203	CNV	2	17	2	0	4	4	3	4	0	0	YES	YES	NO	NO
CNVR_7780	2	28496251	28498350	2100	DEL	4	84	24	0	22	10	18	6	1	3	YES	YES	NO	NO
CNVR_7792	2	29815083	29816389	1307	DEL	3	106	21	1	24	14	17	20	6	3	YES	YES	NO	NO
CNVR_7795	2	30385287	30386883	1597	DEL	3	67	13	0	13	16	15	4	3	3	YES	YES	NO	NO
CNVR_7798	2	31384688	31386250	1563	DEL	3	29	7	0	10	3	4	3	1	1	YES	YES	NO	NO
CNVR_7800	2	31599573	31600663	1091	DEL	4	149	24	2	25	39	24	15	17	3	YES	YES	NO	NO
CNVR_7801	2	32097790	32107891	10102	DUP	3	2	0	0	0	0	0	2	0	0	YES	YES	NO	NO
CNVR_7808	2	33447569	33450407	2839	DEL	3	69	16	0	16	13	10	8	5	1	YES	YES	NO	NO
CNVR_7812	2	33842789	33844475	1687	DEL	3	49	2	0	18	3	8	15	1	2	YES	YES	NO	NO
CNVR_7813	2	33877309	33878153	845	DEL	3	60	19	0	10	8	16	0	5	2	YES	YES	NO	NO
CNVR_7824	2	35498868	35500262	1395	DEL	4	75	18	0	22	6	15	7	4	3	YES	YES	NO	NO
CNVR_7828	2	36018751	36021191	2441	DEL	3	47	13	0	7	12	9	4	0	2	YES	YES	NO	NO
CNVR_7829	2	36318936	36319572	637	DEL	3	23	7	0	6	1	2	4	1	2	YES	YES	NO	NO
CNVR_7837	2	38037694	38039323	1630	DEL	3	158	24	2	25	43	23	23	15	3	YES	YES	NO	NO
CNVR_7840	2	38687683	38688779	1097	DEL	3	148	24	1	25	38	26	20	11	3	YES	YES	NO	NO
CNVR_7853	2	40266940	40268308	1369	DEL	3	79	21	0	21	8	15	9	2	3	YES	YES	NO	NO
CNVR_7856	2	40700941	40765997	65057	DUP	2	8	1	0	2	0	2	3	0	0	YES	YES	NO	NO
CNVR_7859	2	41098362	41099200	839	DEL	2	29	7	0	6	3	8	3	0	2	YES	YES	NO	NO
CNVR_7860	2	41098581	41099153	573	DEL	2	2	0	0	0	0	0	2	0	0	YES	YES	NO	NO
CNVR_7862	2	41494398	41494958	561	DUP	2	15	9	0	1	0	3	2	0	0	YES	YES	NO	NO
CNVR_7865	2	41740624	41741361	738	DEL	4	50	11	0	9	8	10	9	2	1	YES	YES	NO	NO
CNVR_7869	2	41824541	41825229	689	DEL	3	8	0	0	1	0	4	3	0	0	YES	YES	NO	NO
CNVR_7870	2	42187910	42217704	29795	DEL	2	20	5	0	1	4	6	3	0	1	YES	YES	NO	NO
CNVR_7871	2	42466428	42467083	656	DUP	2	6	2	0	1	0	0	3	0	0	YES	YES	NO	NO
CNVR_7877	2	43283172	43284020	849	DEL	4	31	5	0	8	4	0	12	2	0	YES	YES	NO	NO
CNVR_7879	2	43381329	43382833	1505	DEL	4	42	5	1	7	18	8	0	2	1	YES	YES	NO	NO
CNVR_7883	2	44106251	44111500	5250	DUP	3	6	0	0	1	0	2	3	0	0	YES	YES	NO	NO
CNVR_7886	2	44658751	44674200	15450	DUP	2	47	9	0	17	0	15	4	0	2	YES	YES	NO	NO
CNVR_7888	2	45218871	45220647	1777	DEL	3	158	24	2	25	39	24	25	16	3	YES	YES	NO	NO
CNVR_7892	2	45585243	45591073	5831	DEL	3	9	0	0	0	0	6	3	0	0	YES	YES	NO	NO
CNVR_7895	2	45610957	45611490	534	DEL	3	44	5	0	5	11	9	6	6	2	YES	YES	NO	NO
CNVR_7897	2	45739283	45744454	5172	DEL	3	27	3	1	5	3	7	4	2	2	YES	YES	NO	NO
CNVR_7898	2	45900936	45902125	1190	DEL	3	88	21	0	21	12	16	12	3	3	YES	YES	NO	NO
CNVR_7899	2	45989889	45991422	1534	DEL	3	161	25	1	24	51	20	26	11	3	YES	YES	NO	NO
CNVR_7900	2	46057251	46061010	3760	DEL	3	136	23	1	24	41	18	19	7	3	YES	YES	NO	NO
CNVR_7901	2	46275790	46277301	1512	DEL	3	156	22	1	20	46	22	29	13	3	YES	YES	NO	NO
CNVR_7905	2	46924251	46928042	3792	DEL	4	154	24	2	25	36	28	24	12	3	YES	YES	NO	NO
CNVR_7906	2	47072001	47073793	1793	DEL	4	9	5	0	1	0	1	2	0	0	YES	YES	NO	NO
CNVR_7909	2	47424901	47427345	2445	DEL	3	23	2	0	3	3	4	10	0	1	YES	YES	NO	NO
CNVR_7911	2	48207876	48210250	2375	DEL	4	21	4	0	5	0	3	9	0	0	YES	YES	NO	NO
CNVR_7918	2	49101072	49102542	1471	DEL	4	73	17	0	15	8	8	13	9	3	YES	YES	NO	NO
CNVR_7920	2	49191928	49192656	729	DEL	3	15	3	0	1	6	0	2	2	1	YES	YES	NO	NO
CNVR_7922	2	50028343	50030250	1908	DEL	4	137	17	1	24	31	23	21	17	3	YES	YES	NO	NO
CNVR_7927	2	51422650	51424105	1456	DEL	3	26	3	0	3	3	7	4	6	0	YES	YES	NO	NO
CNVR_7933	2	52951371	52952522	1152	DEL	3	41	13	1	8	5	2	12	0	0	YES	YES	NO	NO
CNVR_7943	2	55024853	55025646	794	DEL	3	40	11	0	6	3	15	2	1	2	YES	YES	NO	NO
CNVR_7944	2	55033323	55036027	2705	DEL	4	35	10	0	4	1	15	2	1	2	YES	YES	NO	NO
CNVR_7949	2	55932501	55942500	10000	DEL	3	87	18	1	24	13	16	10	3	2	YES	YES	NO	NO
CNVR_7961	2	57399327	57400877	1551	DEL	4	29	10	0	1	5	5	4	1	3	YES	YES	NO	NO
CNVR_7964	2	57746751	57751717	4967	DUP	2	7	5	0	0	0	0	2	0	0	YES	YES	NO	NO
CNVR_7970	2	58960001	58962461	2461	DEL	3	36	13	0	2	0	10	10	0	1	YES	YES	NO	NO
CNVR_7973	2	59201186	59202365	1180	DEL	3	9	5	0	1	0	1	2	0	0	YES	YES	NO	NO
CNVR_7984	2	60475891	60524810	48920	DEL	2	32	5	0	8	6	9	2	0	2	YES	YES	NO	NO
CNVR_7994	2	61833601	61835670	2070	DEL	3	17	5	0	5	0	3	4	0	0	YES	YES	NO	NO
CNVR_7999	2	62226873	62228639	1767	DEL	4	54	1	0	7	31	2	3	8	2	YES	YES	NO	NO
CNVR_8000	2	62596889	62598787	1899	DEL	3	143	23	2	25	44	20	19	7	3	YES	YES	NO	NO
CNVR_8003	2	63608904	63610034	1131	DEL	3	23	7	0	7	3	0	6	0	0	YES	YES	NO	NO
CNVR_8011	2	65112488	65114115	1628	DEL	3	157	23	2	25	44	24	23	13	3	YES	YES	NO	NO
CNVR_8028	2	67517604	67517979	376	DEL	3	16	1	0	1	6	2	2	4	0	YES	YES	NO	NO
CNVR_8029	2	67656508	67657301	794	DEL	2	33	13	0	5	6	6	2	1	0	YES	YES	NO	NO
CNVR_8030	2	67848993	67850532	1540	DEL	3	97	13	0	17	26	15	18	5	3	YES	YES	NO	NO
CNVR_8032	2	68018701	68019944	1244	DEL	3	13	3	0	4	0	2	4	0	0	YES	YES	NO	NO
CNVR_8035	2	68353080	68354250	1171	DEL	4	124	20	0	23	27	19	16	16	3	YES	YES	NO	NO
CNVR_8053	2	70182251	70187500	5250	DEL	3	26	0	1	0	15	0	8	2	0	YES	YES	NO	NO
CNVR_8058	2	72313421	72316692	3272	DEL	3	108	20	0	24	26	18	13	4	3	YES	YES	NO	NO
CNVR_8059	2	72572466	72573442	977	DEL	3	65	3	0	11	10	13	14	13	1	YES	YES	NO	NO
CNVR_8066	2	73933501	73936750	3250	DEL	3	142	24	3	25	34	21	21	11	3	YES	YES	NO	NO
CNVR_8073	2	75732952	75904810	171859	DEL	3	3	1	0	0	0	0	2	0	0	YES	YES	NO	NO
CNVR_8075	2	75781604	75785500	3897	DEL	4	105	23	0	20	20	22	16	2	2	YES	YES	NO	NO
CNVR_8084	2	76274896	76275890	995	DEL	3	65	13	1	18	5	16	6	3	3	YES	YES	NO	NO
CNVR_8085	2	76349701	76352420	2720	DEL	4	52	8	0	8	18	6	8	4	0	YES	YES	NO	NO
CNVR_8094	2	77046738	77047671	934	DEL	2	18	0	0	3	5	4	4	1	1	YES	YES	NO	NO
CNVR_8110	2	78377249	78378600	1352	DEL	3	31	12	0	3	3	6	3	3	1	YES	YES	NO	NO
CNVR_8113	2	78716595	78717523	929	DEL	2	23	3	0	7	1	4	6	0	2	YES	YES	NO	NO
CNVR_8116	2	78953501	78955160	1660	DEL	4	32	6	0	7	2	7	4	5	1	YES	YES	NO	NO
CNVR_8117	2	78957396	78959247	1852	DEL	2	33	8	0	7	2	7	6	3	0	YES	YES	NO	NO
CNVR_8118	2	78976203	79081539	105337	DEL	3	28	3	0	4	13	4	4	0	0	YES	YES	NO	NO
CNVR_8121	2	79184751	79186198	1448	DEL	3	70	13	0	19	10	15	6	6	1	YES	YES	NO	NO
CNVR_8124	2	79724030	79724966	937	DEL	3	5	0	0	0	0	1	4	0	0	YES	YES	NO	NO
CNVR_8127	2	80481751	80486500	4750	DEL	3	144	23	2	24	34	22	22	14	3	YES	YES	NO	NO
CNVR_8131	2	80691501	80699000	7500	DEL	3	112	14	1	20	35	17	14	8	3	YES	YES	NO	NO
CNVR_8136	2	81438251	81439082	832	DEL	3	63	15	0	13	5	15	8	6	1	YES	YES	NO	NO
CNVR_8151	2	82374489	82375739	1251	DEL	3	17	2	0	8	1	2	4	0	0	YES	YES	NO	NO
CNVR_8152	2	82573142	82608549	35408	CNV	3	15	3	0	7	0	1	3	0	1	YES	YES	NO	NO
CNVR_8154	2	82656931	82659733	2803	DEL	4	164	25	2	25	51	23	19	16	3	YES	YES	NO	NO
CNVR_8157	2	83079695	83220305	140611	DEL	2	5	1	0	0	0	1	2	1	0	YES	YES	NO	NO
CNVR_8160	2	83293251	83295530	2280	DEL	2	7	1	0	1	0	1	4	0	0	YES	YES	NO	NO
CNVR_8162	2	83363313	83363974	662	DEL	3	12	5	0	3	1	0	2	1	0	YES	YES	NO	NO
CNVR_8165	2	83569006	83570012	1007	DEL	3	61	11	0	6	25	12	1	3	3	YES	YES	NO	NO
CNVR_8172	2	84327402	84327941	540	DEL	3	21	1	0	2	4	6	6	2	0	YES	YES	NO	NO
CNVR_8185	2	86401751	86408500	6750	DEL	4	8	0	0	4	0	0	3	0	1	YES	YES	NO	NO
CNVR_8187	2	86862301	86863618	1318	DEL	3	43	9	0	9	8	0	12	4	1	YES	YES	NO	NO
CNVR_8193	2	88039025	88040493	1469	DEL	3	14	0	0	1	7	0	3	3	0	YES	YES	NO	NO
CNVR_8199	2	88988608	88989532	925	DEL	3	2	0	0	0	0	0	2	0	0	YES	YES	NO	NO
CNVR_8201	2	89166212	89166863	652	DEL	3	39	7	0	4	4	8	5	9	2	YES	YES	NO	NO
CNVR_8204	2	89573001	89595500	22500	DUP	3	32	16	0	10	0	3	3	0	0	YES	YES	NO	NO
CNVR_8205	2	89767685	89768842	1158	DEL	4	29	5	1	7	2	3	10	0	1	YES	YES	NO	NO
CNVR_8207	2	90602827	90603637	811	DEL	3	70	12	0	21	7	15	9	3	3	YES	YES	NO	NO
CNVR_8213	2	90895687	90896401	715	DEL	3	7	1	0	0	1	0	4	1	0	YES	YES	NO	NO
CNVR_8214	2	91300306	91301712	1407	DEL	3	144	23	1	25	35	25	20	12	3	YES	YES	NO	NO
CNVR_8223	2	92865319	92866100	782	DEL	3	77	16	0	11	15	13	15	7	0	YES	YES	NO	NO
CNVR_8224	2	92993374	92995813	2440	DEL	4	128	24	0	25	24	26	21	5	3	YES	YES	NO	NO
CNVR_8226	2	93665751	93672611	6861	DEL	3	114	12	1	20	44	10	19	5	3	YES	YES	NO	NO
CNVR_8229	2	93763167	93769130	5964	DEL	3	91	14	0	20	21	16	14	3	3	YES	YES	NO	NO
CNVR_8234	2	94485471	94486305	835	DEL	4	28	7	0	9	4	0	7	1	0	YES	YES	NO	NO
CNVR_8241	2	95374189	95374784	596	DEL	2	11	4	0	2	1	1	2	0	1	YES	YES	NO	NO
CNVR_8242	2	95374311	95374784	474	DEL	3	25	6	0	1	7	5	3	2	1	YES	YES	NO	NO
CNVR_8244	2	95754402	95755284	883	DEL	2	43	10	0	11	3	11	7	1	0	YES	YES	NO	NO
CNVR_8247	2	96261180	96262012	833	DEL	4	36	6	1	5	10	7	5	2	0	YES	YES	NO	NO
CNVR_8256	2	97639627	97640527	901	DEL	3	22	5	0	8	1	1	2	4	1	YES	YES	NO	NO
CNVR_8257	2	97708677	97709649	973	DEL	3	111	21	0	19	28	17	11	14	1	YES	YES	NO	NO
CNVR_8259	2	98393067	98393506	440	DEL	3	26	1	0	0	10	8	4	3	0	YES	YES	NO	NO
CNVR_8262	2	98499301	98507100	7800	DEL	4	81	21	0	19	11	15	5	7	3	YES	YES	NO	NO
CNVR_8269	2	99114308	99115213	906	DEL	2	10	3	0	1	0	3	3	0	0	YES	YES	NO	NO
CNVR_8279	2	100410809	100411863	1055	DEL	3	27	2	0	6	6	4	3	4	2	YES	YES	NO	NO
CNVR_8282	2	100498343	100498861	519	DEL	3	29	7	0	3	7	8	4	0	0	YES	YES	NO	NO
CNVR_8287	2	100794552	100795422	871	DEL	3	4	0	0	0	0	0	3	0	1	YES	YES	NO	NO
CNVR_8288	2	100894339	100895550	1212	DEL	3	17	3	0	1	0	8	4	0	1	YES	YES	NO	NO
CNVR_8290	2	101105351	101135686	30336	DEL	2	28	4	0	8	3	5	5	2	1	YES	YES	NO	NO
CNVR_8292	2	101374406	101376400	1995	DEL	3	161	25	2	25	46	25	20	15	3	YES	YES	NO	NO
CNVR_8294	2	101836165	101837067	903	DEL	3	12	1	0	5	0	3	3	0	0	YES	YES	NO	NO
CNVR_8295	2	101900810	101901574	765	DEL	3	4	0	0	0	0	0	4	0	0	YES	YES	NO	NO
CNVR_8297	2	101943115	101946015	2901	DEL	3	160	24	3	23	53	20	21	14	2	YES	YES	NO	NO
CNVR_8301	2	102168844	102170030	1187	DEL	3	4	0	0	0	0	0	4	0	0	YES	YES	NO	NO
CNVR_8304	2	103238401	103242594	4194	DEL	4	106	24	1	20	15	16	18	10	2	YES	YES	NO	NO
CNVR_8305	2	103373681	103376000	2320	DEL	2	2	0	0	0	0	0	2	0	0	YES	YES	NO	NO
CNVR_8315	2	104806801	105018500	211700	DEL	3	42	13	0	7	5	8	7	1	1	YES	YES	NO	NO
CNVR_8321	2	105706675	105707232	558	DEL	3	28	4	0	6	6	6	4	1	1	YES	YES	NO	NO
CNVR_8322	2	105750251	105751518	1268	DEL	3	78	13	0	14	21	10	13	6	1	YES	YES	NO	NO
CNVR_8324	2	105857553	105859113	1561	DEL	3	110	23	2	18	22	22	15	6	2	YES	YES	NO	NO
CNVR_8326	2	106024910	106025578	669	DEL	2	33	9	0	8	4	5	5	0	2	YES	YES	NO	NO
CNVR_8329	2	106795201	106797750	2550	DEL	4	7	2	0	0	0	3	2	0	0	YES	YES	NO	NO
CNVR_8336	2	108718009	108718653	645	DEL	3	90	13	1	19	15	19	14	6	3	YES	YES	NO	NO
CNVR_8344	2	109969501	109970773	1273	DEL	3	15	4	0	0	5	2	3	1	0	YES	YES	NO	NO
CNVR_8348	2	110745093	110746893	1801	DEL	3	59	7	1	19	13	9	4	3	3	YES	YES	NO	NO
CNVR_8350	2	111418793	111419627	835	DEL	3	57	11	0	13	15	8	7	1	2	YES	YES	NO	NO
CNVR_8352	2	111796751	111816000	19250	DEL	3	14	1	0	1	6	1	4	1	0	YES	YES	NO	NO
CNVR_8353	2	111799759	111832571	32813	DEL	2	73	14	0	20	10	15	9	2	3	YES	YES	NO	NO
CNVR_8360	2	112473111	112474516	1406	DEL	3	14	1	0	5	3	2	2	0	1	YES	YES	NO	NO
CNVR_8373	2	114368245	114368936	692	DEL	3	19	2	0	2	5	4	3	3	0	YES	YES	NO	NO
CNVR_8376	2	115152251	115155288	3038	DEL	3	112	24	0	23	25	22	5	10	3	YES	YES	NO	NO
CNVR_8377	2	115412334	115455650	43317	DEL	3	60	18	0	16	4	9	8	2	3	YES	YES	NO	NO
CNVR_8378	2	115899446	115900303	858	DEL	3	19	6	0	6	0	0	6	1	0	YES	YES	NO	NO
CNVR_8380	2	116715088	116717500	2413	DEL	4	24	12	0	2	0	4	4	1	1	YES	YES	NO	NO
CNVR_8381	2	116721906	116723078	1173	DEL	3	129	24	1	25	27	23	13	13	3	YES	YES	NO	NO
CNVR_8387	2	117188342	117188906	565	DEL	3	15	2	0	1	4	2	5	0	1	YES	YES	NO	NO
CNVR_8388	2	117214561	117216308	1748	DEL	4	50	9	0	9	17	7	5	0	3	YES	YES	NO	NO
CNVR_8389	2	117292501	117299000	6500	DEL	4	27	2	0	11	1	7	3	1	2	YES	YES	NO	NO
CNVR_8391	2	118070699	118073500	2802	DEL	3	62	13	0	10	17	8	8	4	2	YES	YES	NO	NO
CNVR_8393	2	118596001	118598148	2148	DEL	3	104	24	1	25	13	19	12	7	3	YES	YES	NO	NO
CNVR_8406	2	121083129	121084786	1658	DEL	3	145	24	1	24	39	22	20	12	3	YES	YES	NO	NO
CNVR_8412	2	123756992	123760500	3509	DEL	3	4	0	0	0	0	0	3	1	0	YES	YES	NO	NO
CNVR_8426	2	126447052	126447808	757	DEL	2	39	11	0	7	8	6	5	1	1	YES	YES	NO	NO
CNVR_8443	2	129315601	129317400	1800	DEL	4	88	25	0	25	9	17	8	1	3	YES	YES	NO	NO
CNVR_8452	2	130708445	130709286	842	DEL	2	32	6	0	4	12	3	7	0	0	YES	YES	NO	NO
CNVR_8462	2	132487201	132488100	900	DEL	4	29	5	1	5	5	0	11	2	0	YES	YES	NO	NO
CNVR_8466	2	133052050	133053300	1251	DEL	3	18	4	0	5	0	5	3	0	1	YES	YES	NO	NO
CNVR_8473	2	133284251	133296500	12250	DUP	2	69	18	0	14	11	15	7	2	2	YES	YES	NO	NO
CNVR_8478	2	133735255	133736029	775	DEL	3	14	11	0	0	0	0	3	0	0	YES	YES	NO	NO
CNVR_8479	2	134176554	134177157	604	DEL	2	4	1	0	0	0	0	3	0	0	YES	YES	NO	NO
CNVR_8480	2	134411207	135715574	1304368	DEL	2	11	5	0	0	0	0	5	0	1	YES	YES	NO	NO
CNVR_8495	2	136800262	137060500	260239	CNV	3	57	14	0	13	9	12	3	4	2	YES	YES	NO	NO
CNVR_8499	2	136829700	136831622	1923	DEL	2	37	7	0	8	3	11	5	0	3	YES	YES	NO	NO
CNVR_8507	20	431633	432594	962	DEL	3	58	17	0	13	11	7	7	2	1	YES	YES	NO	NO
CNVR_8509	20	566751	570500	3750	DEL	3	54	8	1	11	6	10	13	4	1	YES	YES	NO	NO
CNVR_8510	20	768699	770249	1551	DEL	3	18	1	0	4	6	4	2	0	1	YES	YES	NO	NO
CNVR_8513	20	1609471	1610718	1248	DEL	4	40	15	0	4	2	10	4	3	2	YES	YES	NO	NO
CNVR_8523	20	4420339	4421601	1263	DEL	4	55	2	1	8	24	2	13	5	0	YES	YES	NO	NO
CNVR_8536	20	7013671	7020250	6580	DEL	3	139	23	1	21	43	22	13	13	3	YES	YES	NO	NO
CNVR_8539	20	7672996	7674098	1103	DEL	3	111	22	2	20	22	19	12	12	2	YES	YES	NO	NO
CNVR_8554	20	10027751	10030303	2553	DEL	3	40	11	0	11	1	9	5	0	3	YES	YES	NO	NO
CNVR_8558	20	10631969	10632887	919	DEL	3	124	24	0	24	22	23	15	13	3	YES	YES	NO	NO
CNVR_8560	20	11242801	11246500	3700	DEL	4	50	8	1	8	15	5	8	5	0	YES	YES	NO	NO
CNVR_8568	20	12496494	12497157	664	DEL	3	30	8	0	1	12	3	5	0	1	YES	YES	NO	NO
CNVR_8573	20	12695072	12696389	1318	DEL	3	79	17	1	17	15	8	10	8	3	YES	YES	NO	NO
CNVR_8593	20	15642195	15644354	2160	DEL	4	56	18	0	7	14	16	1	0	0	YES	YES	NO	NO
CNVR_8594	20	15666807	15763622	96816	CNV	3	43	6	0	14	6	6	8	0	3	YES	YES	NO	NO
CNVR_8603	20	16403501	16407600	4100	DEL	4	66	11	2	20	9	6	9	6	3	YES	YES	NO	NO
CNVR_8609	20	17606943	17608400	1458	DEL	4	7	4	0	0	0	0	3	0	0	YES	YES	NO	NO
CNVR_8610	20	18306806	18309326	2521	DEL	3	63	15	0	7	11	17	9	2	2	YES	YES	NO	NO
CNVR_8617	20	19581278	19582509	1232	DEL	3	65	8	0	14	15	14	7	5	2	YES	YES	NO	NO
CNVR_8618	20	19619672	19621661	1990	DEL	4	88	23	0	17	14	13	13	6	2	YES	YES	NO	NO
CNVR_8619	20	19663568	19664303	736	DEL	2	22	4	0	6	5	3	3	1	0	YES	YES	NO	NO
CNVR_8620	20	19663679	19664206	528	DEL	3	48	11	0	7	7	9	6	6	2	YES	YES	NO	NO
CNVR_8623	20	20340606	20342132	1527	DEL	3	69	15	0	9	21	13	11	0	0	YES	YES	NO	NO
CNVR_8634	20	21654237	21658106	3870	DEL	3	71	11	1	21	9	13	11	3	2	YES	YES	NO	NO
CNVR_8636	20	21743393	21743951	559	DEL	2	18	3	0	1	6	1	4	3	0	YES	YES	NO	NO
CNVR_8653	20	25344230	25344806	577	DEL	3	15	1	0	3	0	5	3	2	1	YES	YES	NO	NO
CNVR_8658	20	27034501	27041500	7000	DEL	4	88	22	1	14	11	16	14	8	2	YES	YES	NO	NO
CNVR_8673	20	28886810	28887751	942	DEL	3	21	1	0	7	6	0	5	1	1	YES	YES	NO	NO
CNVR_8674	20	28914329	28915149	821	DEL	3	26	3	0	8	6	4	3	1	1	YES	YES	NO	NO
CNVR_8683	20	29977788	29978846	1059	CNV	2	27	8	0	3	9	1	4	0	2	YES	YES	NO	NO
CNVR_8688	20	30654765	30655561	797	DEL	3	13	5	0	0	0	2	0	5	1	YES	YES	NO	NO
CNVR_8692	20	30969972	30971104	1133	DEL	2	35	13	0	4	8	2	7	1	0	YES	YES	NO	NO
CNVR_8698	20	31704712	31705896	1185	DEL	3	53	15	1	16	4	7	6	2	2	YES	YES	NO	NO
CNVR_8701	20	32226647	32227629	983	DEL	4	46	5	0	13	5	13	1	7	2	YES	YES	NO	NO
CNVR_8703	20	32544301	32549888	5588	DEL	4	19	4	0	6	0	3	3	0	3	YES	YES	NO	NO
CNVR_8706	20	32720001	32726500	6500	DEL	3	147	24	1	25	36	24	20	14	3	YES	YES	NO	NO
CNVR_8708	20	33124115	33129341	5227	DEL	3	13	3	0	2	0	0	7	1	0	YES	YES	NO	NO
CNVR_8709	20	33174616	33176866	2251	DEL	3	88	20	0	16	12	20	8	9	3	YES	YES	NO	NO
CNVR_8710	20	33308358	33309148	791	DEL	3	49	13	0	11	8	7	7	2	1	YES	YES	NO	NO
CNVR_8711	20	33308392	33309177	786	DEL	2	16	4	0	3	4	2	3	0	0	YES	YES	NO	NO
CNVR_8719	20	34438526	34439999	1474	DEL	3	34	12	0	6	1	11	4	0	0	YES	YES	NO	NO
CNVR_8720	20	34503424	34504375	952	DEL	4	27	13	0	2	0	5	7	0	0	YES	YES	NO	NO
CNVR_8729	20	36577375	36579639	2265	DEL	4	66	16	0	17	7	12	9	2	3	YES	YES	NO	NO
CNVR_8730	20	36738001	36740028	2028	DEL	3	152	25	1	25	41	23	20	14	3	YES	YES	NO	NO
CNVR_8733	20	37371031	37380336	9306	DEL	2	14	2	0	3	0	5	2	2	0	YES	YES	NO	NO
CNVR_8735	20	37863251	37864800	1550	DEL	3	70	15	0	14	10	13	11	4	3	YES	YES	NO	NO
CNVR_8738	20	38262501	38269500	7000	DEL	3	43	1	0	0	16	1	14	11	0	YES	YES	NO	NO
CNVR_8739	20	39277201	39279059	1859	DEL	4	70	17	0	4	18	16	8	5	2	YES	YES	NO	NO
CNVR_8740	20	39628167	39631000	2834	DEL	4	67	11	0	22	8	16	4	3	3	YES	YES	NO	NO
CNVR_8742	20	39902964	39903670	707	DEL	3	24	5	0	3	4	8	3	1	0	YES	YES	NO	NO
CNVR_8744	20	40092695	40095088	2394	DEL	3	113	19	1	18	33	17	13	10	2	YES	YES	NO	NO
CNVR_8752	20	41064501	41067785	3285	DEL	4	28	5	0	3	6	6	5	0	3	YES	YES	NO	NO
CNVR_8755	20	41098501	41104500	6000	DEL	4	68	20	0	16	6	20	4	0	2	YES	YES	NO	NO
CNVR_8766	20	43226158	43227500	1343	DEL	3	53	13	0	13	14	6	4	2	1	YES	YES	NO	NO
CNVR_8772	20	43619514	43620665	1152	DEL	2	10	3	0	1	0	1	5	0	0	YES	YES	NO	NO
CNVR_8774	20	43639774	43640522	749	DEL	3	39	14	0	9	1	7	7	0	1	YES	YES	NO	NO
CNVR_8776	20	43773001	43777500	4500	DEL	3	18	6	0	2	0	6	3	0	1	YES	YES	NO	NO
CNVR_8778	20	43835251	43840135	4885	DEL	4	113	24	1	21	29	13	15	7	3	YES	YES	NO	NO
CNVR_8779	20	43923011	43923801	791	DEL	3	102	18	1	17	23	15	15	10	3	YES	YES	NO	NO
CNVR_8780	20	43988101	43993750	5650	DEL	4	91	23	0	21	9	20	11	4	3	YES	YES	NO	NO
CNVR_8782	20	44037455	44038682	1228	DEL	4	29	10	0	4	0	6	8	0	1	YES	YES	NO	NO
CNVR_8784	20	44463301	44464930	1630	DEL	4	118	20	0	25	35	15	14	6	3	YES	YES	NO	NO
CNVR_8791	20	44834388	44882412	48025	DEL	3	76	13	0	20	15	9	9	9	1	YES	YES	NO	NO
CNVR_8795	20	44939701	44944500	4800	DEL	3	68	18	0	19	6	14	8	0	3	YES	YES	NO	NO
CNVR_8797	20	45147532	45148529	998	DEL	3	62	11	0	16	11	14	7	0	3	YES	YES	NO	NO
CNVR_8798	20	45538880	45539763	884	DEL	3	101	17	0	13	30	19	15	4	3	YES	YES	NO	NO
CNVR_8800	20	45697526	45698166	641	DEL	3	44	4	0	11	5	8	9	6	1	YES	YES	NO	NO
CNVR_8803	20	45712056	45713878	1823	DEL	3	18	5	0	3	0	7	2	0	1	YES	YES	NO	NO
CNVR_8807	20	45822399	45823586	1188	DEL	3	28	3	2	5	2	0	11	3	2	YES	YES	NO	NO
CNVR_8809	20	45884945	45887250	2306	DEL	3	98	19	0	23	15	18	10	10	3	YES	YES	NO	NO
CNVR_8814	20	46019694	46030250	10557	DEL	4	87	18	0	16	18	19	10	5	1	YES	YES	NO	NO
CNVR_8816	20	46145804	46146526	723	DEL	3	67	12	1	14	6	17	8	6	3	YES	YES	NO	NO
CNVR_8817	20	46256497	46262750	6254	DEL	4	4	0	0	0	0	0	4	0	0	YES	YES	NO	NO
CNVR_8818	20	46270033	52092102	5822070	DEL	2	7	0	0	0	3	1	3	0	0	YES	YES	NO	NO
CNVR_8824	20	46974668	46975392	725	DEL	2	15	5	0	3	0	3	2	1	1	YES	YES	NO	NO
CNVR_8827	20	47059680	47060864	1185	DEL	4	29	15	0	3	0	0	8	3	0	YES	YES	NO	NO
CNVR_8833	20	47289524	47290175	652	DEL	3	40	9	0	5	6	13	4	2	1	YES	YES	NO	NO
CNVR_8842	20	47991805	47992940	1136	DEL	3	62	12	0	19	14	8	3	3	3	YES	YES	NO	NO
CNVR_8845	20	48091501	48092904	1404	DEL	4	48	7	1	6	16	2	13	3	0	YES	YES	NO	NO
CNVR_8852	20	48588509	48589887	1379	DEL	2	22	10	0	5	0	2	5	0	0	YES	YES	NO	NO
CNVR_8854	20	48649501	48653250	3750	DEL	4	55	6	0	5	24	10	6	3	1	YES	YES	NO	NO
CNVR_8856	20	48818210	48820800	2591	DEL	4	62	22	0	17	1	17	5	0	0	YES	YES	NO	NO
CNVR_8860	20	49513747	49522250	8504	DEL	4	69	6	2	9	27	7	8	8	2	YES	YES	NO	NO
CNVR_8861	20	49593741	49596250	2510	DEL	4	34	7	0	7	12	1	4	2	1	YES	YES	NO	NO
CNVR_8869	20	49889146	49889650	505	DEL	3	22	2	0	3	0	6	5	5	1	YES	YES	NO	NO
CNVR_8875	20	50318448	50319209	762	DEL	3	116	25	1	23	24	20	14	7	2	YES	YES	NO	NO
CNVR_8882	20	50833113	50833822	710	DEL	3	41	5	0	9	11	11	3	1	1	YES	YES	NO	NO
CNVR_8889	20	51090065	51090640	576	DEL	3	27	5	0	7	1	8	3	3	0	YES	YES	NO	NO
CNVR_8893	20	51914603	52438673	524071	DEL	3	9	0	0	0	1	1	7	0	0	YES	YES	NO	NO
CNVR_8894	20	52070114	52071175	1062	DEL	3	70	11	0	22	13	15	3	3	3	YES	YES	NO	NO
CNVR_8895	20	52266202	52267750	1549	DEL	3	121	23	0	19	29	22	14	11	3	YES	YES	NO	NO
CNVR_8897	20	52647501	52653000	5500	DEL	3	22	5	0	6	1	7	2	0	1	YES	YES	NO	NO
CNVR_8908	20	53699501	53705500	6000	DEL	4	58	17	0	20	4	7	8	0	2	YES	YES	NO	NO
CNVR_8910	20	53900001	53901026	1026	DEL	3	12	5	0	0	1	0	3	1	2	YES	YES	NO	NO
[truncated: 2,181 more rows]
