# Supplementary material for: Identification of copy number variation in French dairy and beef breeds using next-generation sequencing
Source: Genet Sel Evol. 2017 Oct 24;49:77. doi: 10.1186/s12711-017-0352-z (PMC5655909; doi:10.1186/s12711-017-0352-z)
Supplement: Supplementary file 10 — Additional file 10: Table S9. Distribution of variants across chromosomes. This table provides variant counts and chromosome coverage for each bovine autosome. [file 12711_2017_352_MOESM10_ESM.xlsx]

## Sheet: Table S9
Additional File 10 Table S9 Distribution of variants across chromosomes
BTA	No. of variants	No. Of CNVRs	No. of duplication regions	No. of deletion regions	Total variants size (bp)	Total CNVRs size (bp)	Total duplications size (bp)	Total deletions size (bp)
1	277	39	4	234	1,732,760	182.66	53.182	1,658,998
2	195	3	9	183	4,207,950	296.847	136.784	3,776,241
3	192	7	4	181	15,750,986	334.106	250.833	15,175,181
4	181	7	3	171	9,341,384	342.906	18.697	9,013,851
5	231	6	3	222	2,206,644	464.928	20.685	1,760,276
6	232	3	3	226	5,317,720	1,311,259	22.891	3,992,174
7	197	5	0	192	4,848,930	447.935	0	4,401,799
8	183	6	1	176	1,573,524	391.114	5.999	1,523,485
9	164	2	6	156	5,522,523	61.332	136.844	5,341,363
10	170	5	3	162	4,876,067	2,800,176	47.547	4,709,821
11	149	2	1	146	8,085,917	56.362	26.999	8,044,625
12	208	13	1	194	10,417,669	6,283,768	4.497	9,483,511
13	122	3	0	119	12,225,866	1,370,796	0	11,199,089
14	180	17	2	161	3,730,936	1,821,608	23.348	3,228,581
15	149	5	1	143	2,602,535	972.285	4.749	1,625,501
16	133	2	1	130	2,226,463	292.322	5.749	2,218,949
17	125	7	1	117	5,473,629	1,346,590	5.249	4,147,998
18	113	4	2	107	8,194,621	61.297	102.306	8,065,585
19	84	3	0	81	2,395,362	219.288	0	2,203,789
20	132	2	2	128	6,611,552	97.873	10.298	6,503,381
21	100	2	2	96	1,536,914	737.898	20.848	921.222
22	61	0	1	60	2,539,173	0	1.601	2,537,572
23	91	4	4	83	5,409,659	4,328,254	131.319	1,027,158
24	108	2	5	101	1,147,895	94.318	30.405	1,041,099
25	38	0	1	37	258.538	0	584	257.954
26	91	1	1	89	1,277,362	4.776	34.309	1,238,277
27	72	7	3	62	13,705,602	1,180,082	2,719,270	10,509,275
28	72	2	1	69	2,372,399	75.487	3.768	2,372,399
29	128	12	2	114	5,064,656	540.832	30.245	4,843,933
