# Supplementary material for: Identification of copy number variation in French dairy and beef breeds using next-generation sequencing
Source: Genet Sel Evol. 2017 Oct 24;49:77. doi: 10.1186/s12711-017-0352-z (PMC5655909; doi:10.1186/s12711-017-0352-z)
Supplement: Supplementary file 11 — Additional file 11: Table S10. Genes overlapping with identified deletion, duplication and CNV regions. In this table, we report genes that overlap entirely or partially with validated variants. [file 12711_2017_352_MOESM11_ESM.xlsx]

## Sheet: Table S10
Additional File 11 Table S10 Genes overlapping identified deletion, duplication, and CNV regions
CNVR_ID	BTA	CNVR_start	CNVR_end	CNVR_size	CNVR_type	Ensembl_Gene_ID	Gene_name	Gene_description	Paralogs	Gene_biotype	Comment
CNVR_15	1	3066743	3277533	210791	DEL	ENSBTAG00000018854		Superoxide dismutase [Cu-Zn] [Source:UniProtKB/Swiss-Prot;Acc:P00442]	Paralogs	protein_coding	Entire gene
CNVR_15	1	3066743	3277533	210791	DEL	ENSBTAG00000018855	SCAF4	SR-related CTD associated factor 4 [Source:HGNC Symbol;Acc:HGNC:19304]	Paralogs	protein_coding	Entire gene
CNVR_49	1	6608857	6609818	962	DEL	ENSBTAG00000038433			Paralogs	protein_coding	Entire gene
CNVR_124	1	14963550	14967038	3489	DEL	ENSBTAG00000003301	NCAM2	neural cell adhesion molecule 2 [Source:HGNC Symbol;Acc:HGNC:7657]	Paralogs	protein_coding	Intron
CNVR_125	1	14964916	14980786	15871	DEL	ENSBTAG00000003301	NCAM2	neural cell adhesion molecule 2 [Source:HGNC Symbol;Acc:HGNC:7657]	Paralogs	protein_coding	Some exons
CNVR_126	1	14974908	14975718	811	DEL	ENSBTAG00000003301	NCAM2	neural cell adhesion molecule 2 [Source:HGNC Symbol;Acc:HGNC:7657]	Paralogs	protein_coding	Intron
CNVR_172	1	20707573	20708215	643	DEL	ENSBTAG00000019314	USP25	ubiquitin specific peptidase 25 [Source:HGNC Symbol;Acc:HGNC:12624]	Paralogs	protein_coding	Intron
CNVR_311	1	35688225	35716363	28139	DEL	ENSBTAG00000023675	ZNF654		Paralogs	protein_coding	Some exons
CNVR_324	1	36884489	36885227	739	DEL	ENSBTAG00000006811	EPHA3	EPH receptor A3 [Source:HGNC Symbol;Acc:HGNC:3387]	Paralogs	protein_coding	Intron
CNVR_328	1	36927846	36929522	1677	DEL	ENSBTAG00000006811	EPHA3	EPH receptor A3 [Source:HGNC Symbol;Acc:HGNC:3387]	Paralogs	protein_coding	Intron
CNVR_329	1	37049799	37051240	1442	DEL	ENSBTAG00000006811	EPHA3	EPH receptor A3 [Source:HGNC Symbol;Acc:HGNC:3387]	Paralogs	protein_coding	Intron
CNVR_355	1	41246347	41247870	1524	DEL	ENSBTAG00000044111	EPHA6	EPH receptor A6 [Source:HGNC Symbol;Acc:HGNC:19296]	Paralogs	protein_coding	Intron
CNVR_358	1	41836294	41836942	649	DEL	ENSBTAG00000015546	MINA	ribosomal oxygenase 2 [Source:HGNC Symbol;Acc:HGNC:19441]	Paralogs	protein_coding	Intron
CNVR_381	1	44906942	44907898	957	DEL	ENSBTAG00000000746	KAT2B	lysine acetyltransferase 2B [Source:HGNC Symbol;Acc:HGNC:8638]	Paralogs	protein_coding	Intron
CNVR_444	1	51022575	51023537	963	DEL	ENSBTAG00000005414		thymosin beta-4 [Source:RefSeq peptide;Acc:NP_001106702]	Paralogs	protein_coding	Entire gene
CNVR_541	1	65787778	65791250	3473	DEL	ENSBTAG00000022155	FSTL1	follistatin like 1 [Source:HGNC Symbol;Acc:HGNC:3972]	Paralogs	protein_coding	Intron
CNVR_546	1	66635718	66636923	1206	DEL	ENSBTAG00000001920	POLQ	DNA polymerase theta [Source:HGNC Symbol;Acc:HGNC:9186]	Paralogs	protein_coding	Intron
CNVR_549	1	67042372	67043081	710	DEL	ENSBTAG00000001442			Paralogs	protein_coding	Some exons
CNVR_564	1	69478840	69479848	1009	DEL	ENSBTAG00000002640	KALRN	kalirin [Source:RefSeq peptide;Acc:NP_001178293]	Paralogs	protein_coding	Intron
CNVR_567	1	70039656	70040451	796	DEL	ENSBTAG00000021396	HEG1	heart development protein with EGF like domains 1 [Source:HGNC Symbol;Acc:HGNC:29227]	No_Paralogs	protein_coding	Intron
CNVR_584	1	72250453	72251400	948	DEL	ENSBTAG00000020378	DLG1	discs large MAGUK scaffold protein 1 [Source:HGNC Symbol;Acc:HGNC:2900]	Paralogs	protein_coding	Intron
CNVR_607	1	77230438	77231010	573	DEL	ENSBTAG00000013205	IL1RAP	interleukin 1 receptor accessory protein [Source:HGNC Symbol;Acc:HGNC:5995]	Paralogs	protein_coding	Intron
CNVR_622	1	78586036	78690227	104192	DEL	ENSBTAG00000032538	TPRG1	tumor protein p63 regulated 1 [Source:HGNC Symbol;Acc:HGNC:24759]	Paralogs	protein_coding	Some exons
CNVR_623	1	78608171	78608976	806	DEL	ENSBTAG00000032538	TPRG1	tumor protein p63 regulated 1 [Source:HGNC Symbol;Acc:HGNC:24759]	Paralogs	protein_coding	Intron
CNVR_637	1	82666001	82669808	3808	DEL	ENSBTAG00000005212	C3orf70	chromosome 3 open reading frame 70 [Source:HGNC Symbol;Acc:HGNC:33731]	No_Paralogs	protein_coding	Intron
CNVR_641	1	83214601	83238900	24300	DEL	ENSBTAG00000005313	EPHB3	ephrin type-B receptor 3 precursor [Source:RefSeq peptide;Acc:NP_001179725]	Paralogs	protein_coding	Intron
CNVR_716	1	95272836	95273484	649	DEL	ENSBTAG00000031802	SPATA16	spermatogenesis associated 16 [Source:HGNC Symbol;Acc:HGNC:29935]	No_Paralogs	protein_coding	Intron
CNVR_724	1	96641501	96644065	2565	DEL	ENSBTAG00000017490	PLD1	phospholipase D1 [Source:HGNC Symbol;Acc:HGNC:9067]	Paralogs	protein_coding	Intron
CNVR_756	1	103110347	103112588	2242	DEL	ENSBTAG00000006975	SI	sucrase-isomaltase [Source:HGNC Symbol;Acc:HGNC:10856]	Paralogs	protein_coding	Intron
CNVR_795	1	107320192	107320801	610	DEL	ENSBTAG00000001274	PPM1L	protein phosphatase, Mg2+/Mn2+ dependent 1L [Source:HGNC Symbol;Acc:HGNC:16381]	Paralogs	protein_coding	Intron
CNVR_799	1	107460858	107462135	1278	DEL	ENSBTAG00000001274	PPM1L	protein phosphatase, Mg2+/Mn2+ dependent 1L [Source:HGNC Symbol;Acc:HGNC:16381]	Paralogs	protein_coding	Intron
CNVR_800	1	107529392	107530344	953	DEL	ENSBTAG00000001274	PPM1L	protein phosphatase, Mg2+/Mn2+ dependent 1L [Source:HGNC Symbol;Acc:HGNC:16381]	Paralogs	protein_coding	Intron
CNVR_804	1	107968929	107970230	1302	DEL	ENSBTAG00000031572		intraflagellar transport 80 [Source:HGNC Symbol;Acc:HGNC:29262]	No_Paralogs	protein_coding	Intron
CNVR_877	1	120110567	120111373	807	DEL	ENSBTAG00000001721	GYG1	glycogenin-1 [Source:RefSeq peptide;Acc:NP_001039332]	Paralogs	protein_coding	Intron
CNVR_893	1	123009245	123013358	4114	DEL	ENSBTAG00000031306		Bos taurus phospholipid scramblase 1	Paralogs	protein_coding	Intron
CNVR_918	1	126342185	126343100	916	DEL	ENSBTAG00000031178	SLC9A9	solute carrier family 9 member A9 [Source:HGNC Symbol;Acc:HGNC:20653]	Paralogs	protein_coding	Intron
CNVR_945	1	131790161	131792500	2340	DEL	ENSBTAG00000001497	MRAS	muscle RAS oncogene homolog [Source:HGNC Symbol;Acc:HGNC:7227]	Paralogs	protein_coding	Intron
CNVR_977	1	138165301	138167500	2200	DEL	ENSBTAG00000002966	DNAJC13	DnaJ heat shock protein family	No_Paralogs	protein_coding	Intron
CNVR_986	1	138619535	138620324	790	DEL	ENSBTAG00000012798	KCNH8	potassium voltage-gated channel subfamily H member 8 [Source:HGNC Symbol;Acc:HGNC:18864]	Paralogs	protein_coding	Intron
CNVR_1001	1	140112941	140113627	687	DEL	ENSBTAG00000009258	NEK11	NIMA related kinase 11 [Source:HGNC Symbol;Acc:HGNC:18593]	Paralogs	protein_coding	Intron
CNVR_1004	1	140377946	140378790	845	DEL	ENSBTAG00000011626	ATP2C1	ATPase secretory pathway Ca2+ transporting 1 [Source:HGNC Symbol;Acc:HGNC:13211]	Paralogs	protein_coding	Intron
CNVR_1027	1	142496085	142533024	36940	DEL	ENSBTAG00000043030	7SK	7SK RNA [Source:RFAM;Acc:RF00100]	Paralogs	misc_RNA	Entire gene
CNVR_1027	1	142496085	142533024	36940	DEL	ENSBTAG00000047593			No_Paralogs	miRNA	Entire gene
CNVR_1195	1	147939426	148104628	165203	DEL	ENSBTAG00000011495	DIP2A	disco interacting protein 2 homolog A [Source:HGNC Symbol;Acc:HGNC:17217]	Paralogs	protein_coding	3' UTR
CNVR_1195	1	147939426	148104628	165203	DEL	ENSBTAG00000004777	S100B	S100 calcium binding protein B [Source:HGNC Symbol;Acc:HGNC:10500]	Paralogs	protein_coding	Entire gene
CNVR_1195	1	147939426	148104628	165203	DEL	ENSBTAG00000005503	PRMT2	protein arginine methyltransferase 2 [Source:HGNC Symbol;Acc:HGNC:5186]	Paralogs	protein_coding	Entire gene
CNVR_1195	1	147939426	148104628	165203	DEL	ENSBTAG00000044930	bta-mir-2289	bta-mir-2289 [Source:miRBase;Acc:MI0011298]	No_Paralogs	miRNA	Entire gene
CNVR_1214	1	150060354	150061106	753	DEL	ENSBTAG00000023384			Paralogs	protein_coding	Intron
CNVR_1215	1	150062001	150107406	45406	DEL	ENSBTAG00000023384			Paralogs	protein_coding	3' UTR
CNVR_17440	8	1781135	1814475	33341	DEL	ENSBTAG00000010326	AADAT	aminoadipate aminotransferase [Source:HGNC Symbol;Acc:HGNC:17929]	No_Paralogs	protein_coding	Some exons
CNVR_1227	1	152461649	152462156	508	DEL	ENSBTAG00000011001	ERG	ERG, ETS transcription factor [Source:HGNC Symbol;Acc:HGNC:3446]	Paralogs	protein_coding	Intron
CNVR_13246	3	41237073	48958884	7721812	DEL	ENSBTAG00000006491	AGL	amylo-alpha-1, 6-glucosidase, 4-alpha-glucanotransferase [Source:HGNC Symbol;Acc:HGNC:321]	No_Paralogs	protein_coding	Entire gene
CNVR_1288	10	688461	689187	727	DEL	ENSBTAG00000035858	MCC	mutated in colorectal cancers [Source:HGNC Symbol;Acc:HGNC:6935]	Paralogs	protein_coding	Intron
CNVR_1290	10	899985	907500	7516	DEL	ENSBTAG00000035858	MCC	mutated in colorectal cancers [Source:HGNC Symbol;Acc:HGNC:6935]	Paralogs	protein_coding	Some exons
CNVR_13954	4	23506396	23876407	370012	DEL	ENSBTAG00000034154	AGMO	alkylglycerol monooxygenase [Source:HGNC Symbol;Acc:HGNC:33784]	No_Paralogs	protein_coding	Some exons
CNVR_1350	10	8806251	8807841	1591	DEL	ENSBTAG00000003263	TBCA	tubulin folding cofactor A [Source:HGNC Symbol;Acc:HGNC:11579]	No_Paralogs	protein_coding	Intron
CNVR_1358	10	9975501	9995400	19900	DUP	ENSBTAG00000002110	DMGDH	dimethylglycine dehydrogenase, mitochondrial [Source:RefSeq peptide;Acc:NP_001192474]	Paralogs	protein_coding	Some exons
CNVR_1362	10	10469918	10471000	1083	DEL	ENSBTAG00000025853	HOMER1	homer scaffolding protein 1 [Source:HGNC Symbol;Acc:HGNC:17512]	Paralogs	protein_coding	Intron
CNVR_1367	10	11538518	11538989	472	DEL	ENSBTAG00000000821	GPR137C	G protein-coupled receptor 137C [Source:HGNC Symbol;Acc:HGNC:25445]	Paralogs	protein_coding	Intron
CNVR_1394	10	17772601	17789000	16400	DUP	ENSBTAG00000010944	LRRC49	leucine rich repeat containing 49 [Source:HGNC Symbol;Acc:HGNC:25965]	Paralogs	protein_coding	Intron
CNVR_1396	10	17842251	17846000	3750	DEL	ENSBTAG00000010944	LRRC49	leucine rich repeat containing 49 [Source:HGNC Symbol;Acc:HGNC:25965]	Paralogs	protein_coding	Intron
CNVR_1405	10	19855501	19863250	7750	DEL	ENSBTAG00000004990	NEO1	neogenin 1 [Source:HGNC Symbol;Acc:HGNC:7754]	Paralogs	protein_coding	Intron
CNVR_1417	10	22262989	22263829	841	DEL	ENSBTAG00000000432	TRAC		No_Paralogs	protein_coding	Intron
CNVR_1423	10	22493983	22500250	6268	DEL	ENSBTAG00000000432	TRAC		No_Paralogs	protein_coding	Intron
CNVR_1426	10	22526591	25267663	2741073	CNV	ENSBTAG00000005941	TRAV8-1		Paralogs	protein_coding	Entire gene
CNVR_1426	10	22526591	25267663	2741073	CNV	ENSBTAG00000022229	TRAV17	T-cell receptor alpha variable 17 [Source:HGNC Symbol;Acc:HGNC:12113]	Paralogs	protein_coding	Entire gene
CNVR_1426	10	22526591	25267663	2741073	CNV	ENSBTAG00000024659			Paralogs	protein_coding	Entire gene
CNVR_1426	10	22526591	25267663	2741073	CNV	ENSBTAG00000027170			Paralogs	protein_coding	Entire gene
CNVR_1426	10	22526591	25267663	2741073	CNV	ENSBTAG00000033045			Paralogs	protein_coding	Entire gene
CNVR_1426	10	22526591	25267663	2741073	CNV	ENSBTAG00000035785			Paralogs	protein_coding	Entire gene
CNVR_1426	10	22526591	25267663	2741073	CNV	ENSBTAG00000036202			Paralogs	protein_coding	Entire gene
CNVR_1426	10	22526591	25267663	2741073	CNV	ENSBTAG00000037924			Paralogs	protein_coding	Entire gene
CNVR_1426	10	22526591	25267663	2741073	CNV	ENSBTAG00000038060			Paralogs	protein_coding	Entire gene
CNVR_1426	10	22526591	25267663	2741073	CNV	ENSBTAG00000038098	TRAV29DV5	T-cell receptor alpha variable 29/delta variable 5	Paralogs	protein_coding	Entire gene
CNVR_1426	10	22526591	25267663	2741073	CNV	ENSBTAG00000038544			Paralogs	protein_coding	Entire gene
CNVR_1426	10	22526591	25267663	2741073	CNV	ENSBTAG00000038565			Paralogs	protein_coding	Entire gene
CNVR_1426	10	22526591	25267663	2741073	CNV	ENSBTAG00000039038			Paralogs	protein_coding	Entire gene
CNVR_1426	10	22526591	25267663	2741073	CNV	ENSBTAG00000039077			No_Paralogs	protein_coding	Entire gene
CNVR_1426	10	22526591	25267663	2741073	CNV	ENSBTAG00000039807			Paralogs	protein_coding	Entire gene
CNVR_1426	10	22526591	25267663	2741073	CNV	ENSBTAG00000040141	TRAV14DV4	T-cell receptor alpha variable 14/delta variable 4 [Source:HGNC Symbol;Acc:HGNC:12110]	Paralogs	protein_coding	Entire gene
CNVR_1426	10	22526591	25267663	2741073	CNV	ENSBTAG00000040504	TRAV16	T-cell receptor alpha variable 16 [Source:HGNC Symbol;Acc:HGNC:12112]	Paralogs	protein_coding	Entire gene
CNVR_1426	10	22526591	25267663	2741073	CNV	ENSBTAG00000045595			Paralogs	protein_coding	Entire gene
CNVR_1426	10	22526591	25267663	2741073	CNV	ENSBTAG00000045758			Paralogs	protein_coding	Entire gene
CNVR_1426	10	22526591	25267663	2741073	CNV	ENSBTAG00000045863	TRAV18	T-cell receptor alpha variable 18 [Source:HGNC Symbol;Acc:HGNC:12114]	Paralogs	protein_coding	Entire gene
CNVR_1426	10	22526591	25267663	2741073	CNV	ENSBTAG00000045883			Paralogs	protein_coding	Entire gene
CNVR_1426	10	22526591	25267663	2741073	CNV	ENSBTAG00000045953			Paralogs	protein_coding	Entire gene
CNVR_1426	10	22526591	25267663	2741073	CNV	ENSBTAG00000046102			Paralogs	protein_coding	Entire gene
CNVR_1426	10	22526591	25267663	2741073	CNV	ENSBTAG00000046157			Paralogs	protein_coding	Entire gene
CNVR_1426	10	22526591	25267663	2741073	CNV	ENSBTAG00000046305			Paralogs	protein_coding	Entire gene
CNVR_1426	10	22526591	25267663	2741073	CNV	ENSBTAG00000046361			Paralogs	protein_coding	Entire gene
CNVR_1426	10	22526591	25267663	2741073	CNV	ENSBTAG00000046426			Paralogs	protein_coding	Entire gene
CNVR_1426	10	22526591	25267663	2741073	CNV	ENSBTAG00000046464			Paralogs	protein_coding	Entire gene
CNVR_1426	10	22526591	25267663	2741073	CNV	ENSBTAG00000046477			Paralogs	protein_coding	Entire gene
CNVR_1426	10	22526591	25267663	2741073	CNV	ENSBTAG00000046500			Paralogs	protein_coding	Entire gene
CNVR_1426	10	22526591	25267663	2741073	CNV	ENSBTAG00000046530			Paralogs	protein_coding	Entire gene
CNVR_1426	10	22526591	25267663	2741073	CNV	ENSBTAG00000046546			Paralogs	protein_coding	Entire gene
CNVR_1426	10	22526591	25267663	2741073	CNV	ENSBTAG00000046682			Paralogs	protein_coding	Entire gene
CNVR_1426	10	22526591	25267663	2741073	CNV	ENSBTAG00000046802			Paralogs	protein_coding	Entire gene
CNVR_1426	10	22526591	25267663	2741073	CNV	ENSBTAG00000046819			Paralogs	protein_coding	Entire gene
CNVR_1426	10	22526591	25267663	2741073	CNV	ENSBTAG00000046897			Paralogs	protein_coding	Entire gene
CNVR_1426	10	22526591	25267663	2741073	CNV	ENSBTAG00000046962			Paralogs	protein_coding	Entire gene
CNVR_1426	10	22526591	25267663	2741073	CNV	ENSBTAG00000046993			Paralogs	protein_coding	Entire gene
CNVR_1426	10	22526591	25267663	2741073	CNV	ENSBTAG00000046995			Paralogs	protein_coding	Entire gene
CNVR_1426	10	22526591	25267663	2741073	CNV	ENSBTAG00000047001			Paralogs	protein_coding	Entire gene
CNVR_1426	10	22526591	25267663	2741073	CNV	ENSBTAG00000047015			Paralogs	protein_coding	Entire gene
CNVR_1426	10	22526591	25267663	2741073	CNV	ENSBTAG00000047041			Paralogs	protein_coding	Entire gene
CNVR_1426	10	22526591	25267663	2741073	CNV	ENSBTAG00000047058			Paralogs	protein_coding	Entire gene
CNVR_1426	10	22526591	25267663	2741073	CNV	ENSBTAG00000047091			Paralogs	protein_coding	Entire gene
CNVR_1426	10	22526591	25267663	2741073	CNV	ENSBTAG00000047096			Paralogs	protein_coding	Entire gene
CNVR_1426	10	22526591	25267663	2741073	CNV	ENSBTAG00000047097			Paralogs	protein_coding	Entire gene
CNVR_1426	10	22526591	25267663	2741073	CNV	ENSBTAG00000047258			Paralogs	protein_coding	Entire gene
CNVR_1426	10	22526591	25267663	2741073	CNV	ENSBTAG00000047276			Paralogs	protein_coding	Entire gene
CNVR_1426	10	22526591	25267663	2741073	CNV	ENSBTAG00000047312			Paralogs	protein_coding	Entire gene
CNVR_1426	10	22526591	25267663	2741073	CNV	ENSBTAG00000047398			Paralogs	protein_coding	Entire gene
CNVR_1426	10	22526591	25267663	2741073	CNV	ENSBTAG00000047444			Paralogs	protein_coding	Entire gene
CNVR_1426	10	22526591	25267663	2741073	CNV	ENSBTAG00000047522			Paralogs	protein_coding	Entire gene
CNVR_1426	10	22526591	25267663	2741073	CNV	ENSBTAG00000047624			Paralogs	protein_coding	Entire gene
CNVR_1426	10	22526591	25267663	2741073	CNV	ENSBTAG00000047639			Paralogs	protein_coding	Entire gene
CNVR_1426	10	22526591	25267663	2741073	CNV	ENSBTAG00000047683			Paralogs	protein_coding	Entire gene
CNVR_1426	10	22526591	25267663	2741073	CNV	ENSBTAG00000047690			Paralogs	protein_coding	Entire gene
CNVR_1426	10	22526591	25267663	2741073	CNV	ENSBTAG00000047909			Paralogs	protein_coding	Entire gene
CNVR_1426	10	22526591	25267663	2741073	CNV	ENSBTAG00000047952			Paralogs	protein_coding	Entire gene
CNVR_1426	10	22526591	25267663	2741073	CNV	ENSBTAG00000047981			Paralogs	protein_coding	Entire gene
CNVR_1426	10	22526591	25267663	2741073	CNV	ENSBTAG00000048064			Paralogs	protein_coding	Entire gene
CNVR_1426	10	22526591	25267663	2741073	CNV	ENSBTAG00000048074			Paralogs	protein_coding	Entire gene
CNVR_1426	10	22526591	25267663	2741073	CNV	ENSBTAG00000048236			Paralogs	protein_coding	Entire gene
CNVR_1426	10	22526591	25267663	2741073	CNV	ENSBTAG00000048302			Paralogs	protein_coding	Entire gene
CNVR_1426	10	22526591	25267663	2741073	CNV	ENSBTAG00000000432	TRAC		No_Paralogs	protein_coding	5' UTR
CNVR_1427	10	22530291	24668156	2137866	CNV	ENSBTAG00000005941	TRAV8-1		Paralogs	protein_coding	Entire gene
CNVR_1427	10	22530291	24668156	2137866	CNV	ENSBTAG00000036202			Paralogs	protein_coding	Entire gene
CNVR_1427	10	22530291	24668156	2137866	CNV	ENSBTAG00000037924			Paralogs	protein_coding	Entire gene
CNVR_1427	10	22530291	24668156	2137866	CNV	ENSBTAG00000038098	TRAV29DV5	T-cell receptor alpha variable 29/delta variable 5	Paralogs	protein_coding	Entire gene
CNVR_1427	10	22530291	24668156	2137866	CNV	ENSBTAG00000038565			Paralogs	protein_coding	Entire gene
CNVR_1427	10	22530291	24668156	2137866	CNV	ENSBTAG00000039038			Paralogs	protein_coding	Entire gene
CNVR_1427	10	22530291	24668156	2137866	CNV	ENSBTAG00000039077			No_Paralogs	protein_coding	Entire gene
CNVR_1427	10	22530291	24668156	2137866	CNV	ENSBTAG00000039807			Paralogs	protein_coding	Entire gene
CNVR_1427	10	22530291	24668156	2137866	CNV	ENSBTAG00000045595			Paralogs	protein_coding	Entire gene
CNVR_1427	10	22530291	24668156	2137866	CNV	ENSBTAG00000045758			Paralogs	protein_coding	Entire gene
CNVR_1427	10	22530291	24668156	2137866	CNV	ENSBTAG00000045953			Paralogs	protein_coding	Entire gene
CNVR_1427	10	22530291	24668156	2137866	CNV	ENSBTAG00000046102			Paralogs	protein_coding	Entire gene
CNVR_1427	10	22530291	24668156	2137866	CNV	ENSBTAG00000046157			Paralogs	protein_coding	Entire gene
CNVR_1427	10	22530291	24668156	2137866	CNV	ENSBTAG00000046305			Paralogs	protein_coding	Entire gene
CNVR_1427	10	22530291	24668156	2137866	CNV	ENSBTAG00000046464			Paralogs	protein_coding	Entire gene
CNVR_1427	10	22530291	24668156	2137866	CNV	ENSBTAG00000046477			Paralogs	protein_coding	Entire gene
CNVR_1427	10	22530291	24668156	2137866	CNV	ENSBTAG00000046500			Paralogs	protein_coding	Entire gene
CNVR_1427	10	22530291	24668156	2137866	CNV	ENSBTAG00000046530			Paralogs	protein_coding	Entire gene
CNVR_1427	10	22530291	24668156	2137866	CNV	ENSBTAG00000046546			Paralogs	protein_coding	Entire gene
CNVR_1427	10	22530291	24668156	2137866	CNV	ENSBTAG00000046682			Paralogs	protein_coding	Entire gene
CNVR_1427	10	22530291	24668156	2137866	CNV	ENSBTAG00000046802			Paralogs	protein_coding	Entire gene
CNVR_1427	10	22530291	24668156	2137866	CNV	ENSBTAG00000046897			Paralogs	protein_coding	Entire gene
CNVR_1427	10	22530291	24668156	2137866	CNV	ENSBTAG00000046962			Paralogs	protein_coding	Entire gene
CNVR_1427	10	22530291	24668156	2137866	CNV	ENSBTAG00000047001			Paralogs	protein_coding	Entire gene
CNVR_1427	10	22530291	24668156	2137866	CNV	ENSBTAG00000047041			Paralogs	protein_coding	Entire gene
CNVR_1427	10	22530291	24668156	2137866	CNV	ENSBTAG00000047091			Paralogs	protein_coding	Entire gene
CNVR_1427	10	22530291	24668156	2137866	CNV	ENSBTAG00000047096			Paralogs	protein_coding	Entire gene
CNVR_1427	10	22530291	24668156	2137866	CNV	ENSBTAG00000047097			Paralogs	protein_coding	Entire gene
CNVR_1427	10	22530291	24668156	2137866	CNV	ENSBTAG00000047258			Paralogs	protein_coding	Entire gene
CNVR_1427	10	22530291	24668156	2137866	CNV	ENSBTAG00000047276			Paralogs	protein_coding	Entire gene
CNVR_1427	10	22530291	24668156	2137866	CNV	ENSBTAG00000047312			Paralogs	protein_coding	Entire gene
CNVR_1427	10	22530291	24668156	2137866	CNV	ENSBTAG00000047398			Paralogs	protein_coding	Entire gene
CNVR_1427	10	22530291	24668156	2137866	CNV	ENSBTAG00000047444			Paralogs	protein_coding	Entire gene
CNVR_1427	10	22530291	24668156	2137866	CNV	ENSBTAG00000047522			Paralogs	protein_coding	Entire gene
CNVR_1427	10	22530291	24668156	2137866	CNV	ENSBTAG00000047624			Paralogs	protein_coding	Entire gene
CNVR_1427	10	22530291	24668156	2137866	CNV	ENSBTAG00000047639			Paralogs	protein_coding	Entire gene
CNVR_1427	10	22530291	24668156	2137866	CNV	ENSBTAG00000047683			Paralogs	protein_coding	Entire gene
CNVR_1427	10	22530291	24668156	2137866	CNV	ENSBTAG00000047690			Paralogs	protein_coding	Entire gene
CNVR_1427	10	22530291	24668156	2137866	CNV	ENSBTAG00000047909			Paralogs	protein_coding	Entire gene
CNVR_1427	10	22530291	24668156	2137866	CNV	ENSBTAG00000047952			Paralogs	protein_coding	Entire gene
CNVR_1427	10	22530291	24668156	2137866	CNV	ENSBTAG00000047981			Paralogs	protein_coding	Entire gene
CNVR_1427	10	22530291	24668156	2137866	CNV	ENSBTAG00000048064			Paralogs	protein_coding	Entire gene
CNVR_1427	10	22530291	24668156	2137866	CNV	ENSBTAG00000048074			Paralogs	protein_coding	Entire gene
CNVR_1427	10	22530291	24668156	2137866	CNV	ENSBTAG00000048236			Paralogs	protein_coding	Entire gene
CNVR_1427	10	22530291	24668156	2137866	CNV	ENSBTAG00000048302			Paralogs	protein_coding	Entire gene
CNVR_1427	10	22530291	24668156	2137866	CNV	ENSBTAG00000000432	TRAC		No_Paralogs	protein_coding	5' UTR
CNVR_1430	10	22586186	23794535	1208350	DEL	ENSBTAG00000036202			Paralogs	protein_coding	Entire gene
CNVR_1430	10	22586186	23794535	1208350	DEL	ENSBTAG00000038098	TRAV29DV5	T-cell receptor alpha variable 29/delta variable 5	Paralogs	protein_coding	Entire gene
CNVR_1430	10	22586186	23794535	1208350	DEL	ENSBTAG00000038565			Paralogs	protein_coding	Entire gene
CNVR_1430	10	22586186	23794535	1208350	DEL	ENSBTAG00000039077			No_Paralogs	protein_coding	Entire gene
CNVR_1430	10	22586186	23794535	1208350	DEL	ENSBTAG00000045758			Paralogs	protein_coding	Entire gene
CNVR_1430	10	22586186	23794535	1208350	DEL	ENSBTAG00000045953			Paralogs	protein_coding	Entire gene
CNVR_1430	10	22586186	23794535	1208350	DEL	ENSBTAG00000046464			Paralogs	protein_coding	Entire gene
CNVR_1430	10	22586186	23794535	1208350	DEL	ENSBTAG00000046477			Paralogs	protein_coding	Entire gene
CNVR_1430	10	22586186	23794535	1208350	DEL	ENSBTAG00000046500			Paralogs	protein_coding	Entire gene
CNVR_1430	10	22586186	23794535	1208350	DEL	ENSBTAG00000046530			Paralogs	protein_coding	Entire gene
CNVR_1430	10	22586186	23794535	1208350	DEL	ENSBTAG00000046682			Paralogs	protein_coding	Entire gene
CNVR_1430	10	22586186	23794535	1208350	DEL	ENSBTAG00000046897			Paralogs	protein_coding	Entire gene
CNVR_1430	10	22586186	23794535	1208350	DEL	ENSBTAG00000047001			Paralogs	protein_coding	Entire gene
CNVR_1430	10	22586186	23794535	1208350	DEL	ENSBTAG00000047041			Paralogs	protein_coding	Entire gene
CNVR_1430	10	22586186	23794535	1208350	DEL	ENSBTAG00000047091			Paralogs	protein_coding	Entire gene
CNVR_1430	10	22586186	23794535	1208350	DEL	ENSBTAG00000047097			Paralogs	protein_coding	Entire gene
CNVR_1430	10	22586186	23794535	1208350	DEL	ENSBTAG00000047258			Paralogs	protein_coding	Entire gene
CNVR_1430	10	22586186	23794535	1208350	DEL	ENSBTAG00000047276			Paralogs	protein_coding	Entire gene
CNVR_1430	10	22586186	23794535	1208350	DEL	ENSBTAG00000047312			Paralogs	protein_coding	Entire gene
CNVR_1430	10	22586186	23794535	1208350	DEL	ENSBTAG00000047398			Paralogs	protein_coding	Entire gene
CNVR_1430	10	22586186	23794535	1208350	DEL	ENSBTAG00000047444			Paralogs	protein_coding	Entire gene
CNVR_1430	10	22586186	23794535	1208350	DEL	ENSBTAG00000047522			Paralogs	protein_coding	Entire gene
CNVR_1430	10	22586186	23794535	1208350	DEL	ENSBTAG00000047683			Paralogs	protein_coding	Entire gene
CNVR_1430	10	22586186	23794535	1208350	DEL	ENSBTAG00000047909			Paralogs	protein_coding	Entire gene
CNVR_1430	10	22586186	23794535	1208350	DEL	ENSBTAG00000047981			Paralogs	protein_coding	Entire gene
CNVR_1430	10	22586186	23794535	1208350	DEL	ENSBTAG00000048064			Paralogs	protein_coding	Entire gene
CNVR_1430	10	22586186	23794535	1208350	DEL	ENSBTAG00000048302			Paralogs	protein_coding	Entire gene
CNVR_1430	10	22586186	23794535	1208350	DEL	ENSBTAG00000000432	TRAC		No_Paralogs	protein_coding	5' UTR
CNVR_1435	10	22699322	22793278	93957	DEL	ENSBTAG00000046464			Paralogs	protein_coding	Entire gene
CNVR_1435	10	22699322	22793278	93957	DEL	ENSBTAG00000048302			Paralogs	protein_coding	Entire gene
CNVR_1435	10	22699322	22793278	93957	DEL	ENSBTAG00000000432	TRAC		No_Paralogs	protein_coding	Intron
CNVR_1439	10	22833948	23577776	743829	DEL	ENSBTAG00000036202			Paralogs	protein_coding	Entire gene
CNVR_1439	10	22833948	23577776	743829	DEL	ENSBTAG00000038098	TRAV29DV5	T-cell receptor alpha variable 29/delta variable 5	Paralogs	protein_coding	Entire gene
CNVR_1439	10	22833948	23577776	743829	DEL	ENSBTAG00000038565			Paralogs	protein_coding	Entire gene
CNVR_1439	10	22833948	23577776	743829	DEL	ENSBTAG00000039077			No_Paralogs	protein_coding	Entire gene
CNVR_1439	10	22833948	23577776	743829	DEL	ENSBTAG00000046477			Paralogs	protein_coding	Entire gene
CNVR_1439	10	22833948	23577776	743829	DEL	ENSBTAG00000046530			Paralogs	protein_coding	Entire gene
CNVR_1439	10	22833948	23577776	743829	DEL	ENSBTAG00000046682			Paralogs	protein_coding	Entire gene
CNVR_1439	10	22833948	23577776	743829	DEL	ENSBTAG00000046897			Paralogs	protein_coding	Entire gene
CNVR_1439	10	22833948	23577776	743829	DEL	ENSBTAG00000047001			Paralogs	protein_coding	Entire gene
CNVR_1439	10	22833948	23577776	743829	DEL	ENSBTAG00000047091			Paralogs	protein_coding	Entire gene
CNVR_1439	10	22833948	23577776	743829	DEL	ENSBTAG00000047276			Paralogs	protein_coding	Entire gene
CNVR_1439	10	22833948	23577776	743829	DEL	ENSBTAG00000047312			Paralogs	protein_coding	Entire gene
CNVR_1439	10	22833948	23577776	743829	DEL	ENSBTAG00000047444			Paralogs	protein_coding	Entire gene
CNVR_1439	10	22833948	23577776	743829	DEL	ENSBTAG00000047683			Paralogs	protein_coding	Entire gene
CNVR_1439	10	22833948	23577776	743829	DEL	ENSBTAG00000047981			Paralogs	protein_coding	Entire gene
CNVR_1439	10	22833948	23577776	743829	DEL	ENSBTAG00000048064			Paralogs	protein_coding	Entire gene
CNVR_1439	10	22833948	23577776	743829	DEL	ENSBTAG00000000432	TRAC		No_Paralogs	protein_coding	5' UTR
CNVR_1450	10	23118251	25023840	1905590	CNV	ENSBTAG00000005941	TRAV8-1		Paralogs	protein_coding	Entire gene
CNVR_1450	10	23118251	25023840	1905590	CNV	ENSBTAG00000024659			Paralogs	protein_coding	Entire gene
CNVR_1450	10	23118251	25023840	1905590	CNV	ENSBTAG00000027170			Paralogs	protein_coding	Entire gene
CNVR_1450	10	23118251	25023840	1905590	CNV	ENSBTAG00000035785			Paralogs	protein_coding	Entire gene
CNVR_1450	10	23118251	25023840	1905590	CNV	ENSBTAG00000036202			Paralogs	protein_coding	Entire gene
CNVR_1450	10	23118251	25023840	1905590	CNV	ENSBTAG00000037924			Paralogs	protein_coding	Entire gene
CNVR_1450	10	23118251	25023840	1905590	CNV	ENSBTAG00000038060			Paralogs	protein_coding	Entire gene
CNVR_1450	10	23118251	25023840	1905590	CNV	ENSBTAG00000038565			Paralogs	protein_coding	Entire gene
CNVR_1450	10	23118251	25023840	1905590	CNV	ENSBTAG00000039038			Paralogs	protein_coding	Entire gene
CNVR_1450	10	23118251	25023840	1905590	CNV	ENSBTAG00000039807			Paralogs	protein_coding	Entire gene
CNVR_1450	10	23118251	25023840	1905590	CNV	ENSBTAG00000040141	TRAV14DV4	T-cell receptor alpha variable 14/delta variable 4 [Source:HGNC Symbol;Acc:HGNC:12110]	Paralogs	protein_coding	Entire gene
CNVR_1450	10	23118251	25023840	1905590	CNV	ENSBTAG00000045953			Paralogs	protein_coding	Entire gene
CNVR_1450	10	23118251	25023840	1905590	CNV	ENSBTAG00000046102			Paralogs	protein_coding	Entire gene
CNVR_1450	10	23118251	25023840	1905590	CNV	ENSBTAG00000046157			Paralogs	protein_coding	Entire gene
CNVR_1450	10	23118251	25023840	1905590	CNV	ENSBTAG00000046305			Paralogs	protein_coding	Entire gene
CNVR_1450	10	23118251	25023840	1905590	CNV	ENSBTAG00000046477			Paralogs	protein_coding	Entire gene
CNVR_1450	10	23118251	25023840	1905590	CNV	ENSBTAG00000046500			Paralogs	protein_coding	Entire gene
CNVR_1450	10	23118251	25023840	1905590	CNV	ENSBTAG00000046546			Paralogs	protein_coding	Entire gene
CNVR_1450	10	23118251	25023840	1905590	CNV	ENSBTAG00000046802			Paralogs	protein_coding	Entire gene
CNVR_1450	10	23118251	25023840	1905590	CNV	ENSBTAG00000046819			Paralogs	protein_coding	Entire gene
CNVR_1450	10	23118251	25023840	1905590	CNV	ENSBTAG00000046897			Paralogs	protein_coding	Entire gene
CNVR_1450	10	23118251	25023840	1905590	CNV	ENSBTAG00000047001			Paralogs	protein_coding	Entire gene
CNVR_1450	10	23118251	25023840	1905590	CNV	ENSBTAG00000047058			Paralogs	protein_coding	Entire gene
CNVR_1450	10	23118251	25023840	1905590	CNV	ENSBTAG00000047091			Paralogs	protein_coding	Entire gene
CNVR_1450	10	23118251	25023840	1905590	CNV	ENSBTAG00000047096			Paralogs	protein_coding	Entire gene
CNVR_1450	10	23118251	25023840	1905590	CNV	ENSBTAG00000047097			Paralogs	protein_coding	Entire gene
CNVR_1450	10	23118251	25023840	1905590	CNV	ENSBTAG00000047276			Paralogs	protein_coding	Entire gene
CNVR_1450	10	23118251	25023840	1905590	CNV	ENSBTAG00000047312			Paralogs	protein_coding	Entire gene
CNVR_1450	10	23118251	25023840	1905590	CNV	ENSBTAG00000047398			Paralogs	protein_coding	Entire gene
CNVR_1450	10	23118251	25023840	1905590	CNV	ENSBTAG00000047522			Paralogs	protein_coding	Entire gene
CNVR_1450	10	23118251	25023840	1905590	CNV	ENSBTAG00000047624			Paralogs	protein_coding	Entire gene
CNVR_1450	10	23118251	25023840	1905590	CNV	ENSBTAG00000047639			Paralogs	protein_coding	Entire gene
CNVR_1450	10	23118251	25023840	1905590	CNV	ENSBTAG00000047683			Paralogs	protein_coding	Entire gene
CNVR_1450	10	23118251	25023840	1905590	CNV	ENSBTAG00000047690			Paralogs	protein_coding	Entire gene
CNVR_1450	10	23118251	25023840	1905590	CNV	ENSBTAG00000047909			Paralogs	protein_coding	Entire gene
CNVR_1450	10	23118251	25023840	1905590	CNV	ENSBTAG00000047952			Paralogs	protein_coding	Entire gene
CNVR_1450	10	23118251	25023840	1905590	CNV	ENSBTAG00000047981			Paralogs	protein_coding	Entire gene
CNVR_1450	10	23118251	25023840	1905590	CNV	ENSBTAG00000048064			Paralogs	protein_coding	Entire gene
CNVR_1450	10	23118251	25023840	1905590	CNV	ENSBTAG00000048074			Paralogs	protein_coding	Entire gene
CNVR_1450	10	23118251	25023840	1905590	CNV	ENSBTAG00000048236			Paralogs	protein_coding	Entire gene
CNVR_1450	10	23118251	25023840	1905590	CNV	ENSBTAG00000000432	TRAC		No_Paralogs	protein_coding	5' UTR
CNVR_1453	10	23164416	23172539	8124	DEL	ENSBTAG00000000432	TRAC		No_Paralogs	protein_coding	Intron
CNVR_1458	10	23367942	25375166	2007225	DEL	ENSBTAG00000005941	TRAV8-1		Paralogs	protein_coding	Entire gene
CNVR_1458	10	23367942	25375166	2007225	DEL	ENSBTAG00000022229	TRAV17	T-cell receptor alpha variable 17 [Source:HGNC Symbol;Acc:HGNC:12113]	Paralogs	protein_coding	Entire gene
CNVR_1458	10	23367942	25375166	2007225	DEL	ENSBTAG00000024659			Paralogs	protein_coding	Entire gene
CNVR_1458	10	23367942	25375166	2007225	DEL	ENSBTAG00000027170			Paralogs	protein_coding	Entire gene
CNVR_1458	10	23367942	25375166	2007225	DEL	ENSBTAG00000033034			Paralogs	protein_coding	Entire gene
CNVR_1458	10	23367942	25375166	2007225	DEL	ENSBTAG00000033036			Paralogs	protein_coding	Entire gene
CNVR_1458	10	23367942	25375166	2007225	DEL	ENSBTAG00000033045			Paralogs	protein_coding	Entire gene
CNVR_1458	10	23367942	25375166	2007225	DEL	ENSBTAG00000035530			Paralogs	protein_coding	Entire gene
CNVR_1458	10	23367942	25375166	2007225	DEL	ENSBTAG00000035785			Paralogs	protein_coding	Entire gene
CNVR_1458	10	23367942	25375166	2007225	DEL	ENSBTAG00000037924			Paralogs	protein_coding	Entire gene
CNVR_1458	10	23367942	25375166	2007225	DEL	ENSBTAG00000038060			Paralogs	protein_coding	Entire gene
CNVR_1458	10	23367942	25375166	2007225	DEL	ENSBTAG00000038544			Paralogs	protein_coding	Entire gene
CNVR_1458	10	23367942	25375166	2007225	DEL	ENSBTAG00000039038			Paralogs	protein_coding	Entire gene
CNVR_1458	10	23367942	25375166	2007225	DEL	ENSBTAG00000039807			Paralogs	protein_coding	Entire gene
CNVR_1458	10	23367942	25375166	2007225	DEL	ENSBTAG00000040141	TRAV14DV4	T-cell receptor alpha variable 14/delta variable 4 [Source:HGNC Symbol;Acc:HGNC:12110]	Paralogs	protein_coding	Entire gene
CNVR_1458	10	23367942	25375166	2007225	DEL	ENSBTAG00000040504	TRAV16	T-cell receptor alpha variable 16 [Source:HGNC Symbol;Acc:HGNC:12112]	Paralogs	protein_coding	Entire gene
CNVR_1458	10	23367942	25375166	2007225	DEL	ENSBTAG00000045863	TRAV18	T-cell receptor alpha variable 18 [Source:HGNC Symbol;Acc:HGNC:12114]	Paralogs	protein_coding	Entire gene
CNVR_1458	10	23367942	25375166	2007225	DEL	ENSBTAG00000045883			Paralogs	protein_coding	Entire gene
CNVR_1458	10	23367942	25375166	2007225	DEL	ENSBTAG00000045953			Paralogs	protein_coding	Entire gene
CNVR_1458	10	23367942	25375166	2007225	DEL	ENSBTAG00000046102			Paralogs	protein_coding	Entire gene
CNVR_1458	10	23367942	25375166	2007225	DEL	ENSBTAG00000046157			Paralogs	protein_coding	Entire gene
CNVR_1458	10	23367942	25375166	2007225	DEL	ENSBTAG00000046305			Paralogs	protein_coding	Entire gene
CNVR_1458	10	23367942	25375166	2007225	DEL	ENSBTAG00000046361			Paralogs	protein_coding	Entire gene
CNVR_1458	10	23367942	25375166	2007225	DEL	ENSBTAG00000046426			Paralogs	protein_coding	Entire gene
CNVR_1458	10	23367942	25375166	2007225	DEL	ENSBTAG00000046477			Paralogs	protein_coding	Entire gene
CNVR_1458	10	23367942	25375166	2007225	DEL	ENSBTAG00000046500			Paralogs	protein_coding	Entire gene
CNVR_1458	10	23367942	25375166	2007225	DEL	ENSBTAG00000046546			Paralogs	protein_coding	Entire gene
CNVR_1458	10	23367942	25375166	2007225	DEL	ENSBTAG00000046643			Paralogs	protein_coding	Entire gene
CNVR_1458	10	23367942	25375166	2007225	DEL	ENSBTAG00000046802			Paralogs	protein_coding	Entire gene
CNVR_1458	10	23367942	25375166	2007225	DEL	ENSBTAG00000046819			Paralogs	protein_coding	Entire gene
CNVR_1458	10	23367942	25375166	2007225	DEL	ENSBTAG00000046897			Paralogs	protein_coding	Entire gene
CNVR_1458	10	23367942	25375166	2007225	DEL	ENSBTAG00000046993			Paralogs	protein_coding	Entire gene
CNVR_1458	10	23367942	25375166	2007225	DEL	ENSBTAG00000046995			Paralogs	protein_coding	Entire gene
CNVR_1458	10	23367942	25375166	2007225	DEL	ENSBTAG00000047001			Paralogs	protein_coding	Entire gene
CNVR_1458	10	23367942	25375166	2007225	DEL	ENSBTAG00000047015			Paralogs	protein_coding	Entire gene
CNVR_1458	10	23367942	25375166	2007225	DEL	ENSBTAG00000047058			Paralogs	protein_coding	Entire gene
CNVR_1458	10	23367942	25375166	2007225	DEL	ENSBTAG00000047091			Paralogs	protein_coding	Entire gene
CNVR_1458	10	23367942	25375166	2007225	DEL	ENSBTAG00000047096			Paralogs	protein_coding	Entire gene
CNVR_1458	10	23367942	25375166	2007225	DEL	ENSBTAG00000047097			Paralogs	protein_coding	Entire gene
CNVR_1458	10	23367942	25375166	2007225	DEL	ENSBTAG00000047398			Paralogs	protein_coding	Entire gene
CNVR_1458	10	23367942	25375166	2007225	DEL	ENSBTAG00000047522			Paralogs	protein_coding	Entire gene
CNVR_1458	10	23367942	25375166	2007225	DEL	ENSBTAG00000047624			Paralogs	protein_coding	Entire gene
CNVR_1458	10	23367942	25375166	2007225	DEL	ENSBTAG00000047639			Paralogs	protein_coding	Entire gene
CNVR_1458	10	23367942	25375166	2007225	DEL	ENSBTAG00000047683			Paralogs	protein_coding	Entire gene
CNVR_1458	10	23367942	25375166	2007225	DEL	ENSBTAG00000047690			Paralogs	protein_coding	Entire gene
CNVR_1458	10	23367942	25375166	2007225	DEL	ENSBTAG00000047909			Paralogs	protein_coding	Entire gene
CNVR_1458	10	23367942	25375166	2007225	DEL	ENSBTAG00000047952			Paralogs	protein_coding	Entire gene
CNVR_1458	10	23367942	25375166	2007225	DEL	ENSBTAG00000047981			Paralogs	protein_coding	Entire gene
CNVR_1458	10	23367942	25375166	2007225	DEL	ENSBTAG00000048074			Paralogs	protein_coding	Entire gene
CNVR_1458	10	23367942	25375166	2007225	DEL	ENSBTAG00000048236			Paralogs	protein_coding	Entire gene
CNVR_1459	10	23377915	24565453	1187539	DEL	ENSBTAG00000005941	TRAV8-1		Paralogs	protein_coding	Entire gene
CNVR_1459	10	23377915	24565453	1187539	DEL	ENSBTAG00000037924			Paralogs	protein_coding	Entire gene
CNVR_1459	10	23377915	24565453	1187539	DEL	ENSBTAG00000039038			Paralogs	protein_coding	Entire gene
CNVR_1459	10	23377915	24565453	1187539	DEL	ENSBTAG00000039807			Paralogs	protein_coding	Entire gene
CNVR_1459	10	23377915	24565453	1187539	DEL	ENSBTAG00000045953			Paralogs	protein_coding	Entire gene
CNVR_1459	10	23377915	24565453	1187539	DEL	ENSBTAG00000046102			Paralogs	protein_coding	Entire gene
CNVR_1459	10	23377915	24565453	1187539	DEL	ENSBTAG00000046157			Paralogs	protein_coding	Entire gene
CNVR_1459	10	23377915	24565453	1187539	DEL	ENSBTAG00000046305			Paralogs	protein_coding	Entire gene
CNVR_1459	10	23377915	24565453	1187539	DEL	ENSBTAG00000046477			Paralogs	protein_coding	Entire gene
CNVR_1459	10	23377915	24565453	1187539	DEL	ENSBTAG00000046500			Paralogs	protein_coding	Entire gene
CNVR_1459	10	23377915	24565453	1187539	DEL	ENSBTAG00000046546			Paralogs	protein_coding	Entire gene
CNVR_1459	10	23377915	24565453	1187539	DEL	ENSBTAG00000046897			Paralogs	protein_coding	Entire gene
CNVR_1459	10	23377915	24565453	1187539	DEL	ENSBTAG00000047001			Paralogs	protein_coding	Entire gene
CNVR_1459	10	23377915	24565453	1187539	DEL	ENSBTAG00000047091			Paralogs	protein_coding	Entire gene
CNVR_1459	10	23377915	24565453	1187539	DEL	ENSBTAG00000047096			Paralogs	protein_coding	Entire gene
CNVR_1459	10	23377915	24565453	1187539	DEL	ENSBTAG00000047097			Paralogs	protein_coding	Entire gene
CNVR_1459	10	23377915	24565453	1187539	DEL	ENSBTAG00000047398			Paralogs	protein_coding	Entire gene
CNVR_1459	10	23377915	24565453	1187539	DEL	ENSBTAG00000047522			Paralogs	protein_coding	Entire gene
CNVR_1459	10	23377915	24565453	1187539	DEL	ENSBTAG00000047624			Paralogs	protein_coding	Entire gene
CNVR_1459	10	23377915	24565453	1187539	DEL	ENSBTAG00000047639			Paralogs	protein_coding	Entire gene
CNVR_1459	10	23377915	24565453	1187539	DEL	ENSBTAG00000047683			Paralogs	protein_coding	Entire gene
CNVR_1459	10	23377915	24565453	1187539	DEL	ENSBTAG00000047690			Paralogs	protein_coding	Entire gene
CNVR_1459	10	23377915	24565453	1187539	DEL	ENSBTAG00000047909			Paralogs	protein_coding	Entire gene
CNVR_1459	10	23377915	24565453	1187539	DEL	ENSBTAG00000047952			Paralogs	protein_coding	Entire gene
CNVR_1459	10	23377915	24565453	1187539	DEL	ENSBTAG00000047981			Paralogs	protein_coding	Entire gene
CNVR_1459	10	23377915	24565453	1187539	DEL	ENSBTAG00000048074			Paralogs	protein_coding	Entire gene
CNVR_1459	10	23377915	24565453	1187539	DEL	ENSBTAG00000048236			Paralogs	protein_coding	Entire gene
CNVR_1469	10	23654701	23750000	95300	DEL	ENSBTAG00000047522			Paralogs	protein_coding	Entire gene
CNVR_1469	10	23654701	23750000	95300	DEL	ENSBTAG00000047909			Paralogs	protein_coding	Entire gene
CNVR_1473	10	23927578	23972764	45187	CNV	ENSBTAG00000039807			Paralogs	protein_coding	Entire gene
CNVR_1475	10	24086637	25393338	1306702	DEL	ENSBTAG00000022229	TRAV17	T-cell receptor alpha variable 17 [Source:HGNC Symbol;Acc:HGNC:12113]	Paralogs	protein_coding	Entire gene
CNVR_1475	10	24086637	25393338	1306702	DEL	ENSBTAG00000024659			Paralogs	protein_coding	Entire gene
CNVR_1475	10	24086637	25393338	1306702	DEL	ENSBTAG00000027170			Paralogs	protein_coding	Entire gene
CNVR_1475	10	24086637	25393338	1306702	DEL	ENSBTAG00000033034			Paralogs	protein_coding	Entire gene
CNVR_1475	10	24086637	25393338	1306702	DEL	ENSBTAG00000033036			Paralogs	protein_coding	Entire gene
CNVR_1475	10	24086637	25393338	1306702	DEL	ENSBTAG00000033045			Paralogs	protein_coding	Entire gene
CNVR_1475	10	24086637	25393338	1306702	DEL	ENSBTAG00000035530			Paralogs	protein_coding	Entire gene
CNVR_1475	10	24086637	25393338	1306702	DEL	ENSBTAG00000035785			Paralogs	protein_coding	Entire gene
CNVR_1475	10	24086637	25393338	1306702	DEL	ENSBTAG00000038060			Paralogs	protein_coding	Entire gene
CNVR_1475	10	24086637	25393338	1306702	DEL	ENSBTAG00000038544			Paralogs	protein_coding	Entire gene
CNVR_1475	10	24086637	25393338	1306702	DEL	ENSBTAG00000039546			Paralogs	protein_coding	Entire gene
CNVR_1475	10	24086637	25393338	1306702	DEL	ENSBTAG00000040141	TRAV14DV4	T-cell receptor alpha variable 14/delta variable 4 [Source:HGNC Symbol;Acc:HGNC:12110]	Paralogs	protein_coding	Entire gene
CNVR_1475	10	24086637	25393338	1306702	DEL	ENSBTAG00000040504	TRAV16	T-cell receptor alpha variable 16 [Source:HGNC Symbol;Acc:HGNC:12112]	Paralogs	protein_coding	Entire gene
CNVR_1475	10	24086637	25393338	1306702	DEL	ENSBTAG00000045863	TRAV18	T-cell receptor alpha variable 18 [Source:HGNC Symbol;Acc:HGNC:12114]	Paralogs	protein_coding	Entire gene
CNVR_1475	10	24086637	25393338	1306702	DEL	ENSBTAG00000045883			Paralogs	protein_coding	Entire gene
CNVR_1475	10	24086637	25393338	1306702	DEL	ENSBTAG00000046102			Paralogs	protein_coding	Entire gene
CNVR_1475	10	24086637	25393338	1306702	DEL	ENSBTAG00000046157			Paralogs	protein_coding	Entire gene
CNVR_1475	10	24086637	25393338	1306702	DEL	ENSBTAG00000046305			Paralogs	protein_coding	Entire gene
CNVR_1475	10	24086637	25393338	1306702	DEL	ENSBTAG00000046361			Paralogs	protein_coding	Entire gene
CNVR_1475	10	24086637	25393338	1306702	DEL	ENSBTAG00000046426			Paralogs	protein_coding	Entire gene
CNVR_1475	10	24086637	25393338	1306702	DEL	ENSBTAG00000046478			Paralogs	protein_coding	Entire gene
CNVR_1475	10	24086637	25393338	1306702	DEL	ENSBTAG00000046546			Paralogs	protein_coding	Entire gene
CNVR_1475	10	24086637	25393338	1306702	DEL	ENSBTAG00000046643			Paralogs	protein_coding	Entire gene
CNVR_1475	10	24086637	25393338	1306702	DEL	ENSBTAG00000046802			Paralogs	protein_coding	Entire gene
CNVR_1475	10	24086637	25393338	1306702	DEL	ENSBTAG00000046819			Paralogs	protein_coding	Entire gene
CNVR_1475	10	24086637	25393338	1306702	DEL	ENSBTAG00000046993			Paralogs	protein_coding	Entire gene
CNVR_1475	10	24086637	25393338	1306702	DEL	ENSBTAG00000046995			Paralogs	protein_coding	Entire gene
CNVR_1475	10	24086637	25393338	1306702	DEL	ENSBTAG00000047015			Paralogs	protein_coding	Entire gene
CNVR_1475	10	24086637	25393338	1306702	DEL	ENSBTAG00000047058			Paralogs	protein_coding	Entire gene
CNVR_1475	10	24086637	25393338	1306702	DEL	ENSBTAG00000047096			Paralogs	protein_coding	Entire gene
CNVR_1475	10	24086637	25393338	1306702	DEL	ENSBTAG00000047624			Paralogs	protein_coding	Entire gene
CNVR_1475	10	24086637	25393338	1306702	DEL	ENSBTAG00000047639			Paralogs	protein_coding	Entire gene
CNVR_1475	10	24086637	25393338	1306702	DEL	ENSBTAG00000047690			Paralogs	protein_coding	Entire gene
CNVR_1475	10	24086637	25393338	1306702	DEL	ENSBTAG00000047952			Paralogs	protein_coding	Entire gene
CNVR_1525	10	26730792	26731520	729	DEL	ENSBTAG00000001183	KLHL33	kelch like family member 33 [Source:HGNC Symbol;Acc:HGNC:31952]	Paralogs	protein_coding	Intron
CNVR_1539	10	27154062	27600561	446500	DEL	ENSBTAG00000039416			Paralogs	protein_coding	3' UTR
CNVR_1539	10	27154062	27600561	446500	DEL	ENSBTAG00000004821	OR4K14	olfactory receptor family 4 subfamily K member 14 [Source:HGNC Symbol;Acc:HGNC:15352]	Paralogs	protein_coding	Entire gene
CNVR_1539	10	27154062	27600561	446500	DEL	ENSBTAG00000009039	OR4K5	olfactory receptor family 4 subfamily K member 5 [Source:HGNC Symbol;Acc:HGNC:14745]	Paralogs	protein_coding	Entire gene
CNVR_1539	10	27154062	27600561	446500	DEL	ENSBTAG00000011510			Paralogs	protein_coding	Entire gene
CNVR_1539	10	27154062	27600561	446500	DEL	ENSBTAG00000022915	OR4Q2	olfactory receptor family 4 subfamily Q member 2	Paralogs	protein_coding	Entire gene
CNVR_1539	10	27154062	27600561	446500	DEL	ENSBTAG00000032781			No_Paralogs	pseudogene	Entire gene
CNVR_1539	10	27154062	27600561	446500	DEL	ENSBTAG00000032783			No_Paralogs	pseudogene	Entire gene
CNVR_1539	10	27154062	27600561	446500	DEL	ENSBTAG00000032789	OR4N2	olfactory receptor family 4 subfamily N member 2 [Source:HGNC Symbol;Acc:HGNC:14742]	Paralogs	protein_coding	Entire gene
CNVR_1539	10	27154062	27600561	446500	DEL	ENSBTAG00000032792	OR4Q3	olfactory receptor family 4 subfamily Q member 3 [Source:HGNC Symbol;Acc:HGNC:15426]	Paralogs	protein_coding	Entire gene
CNVR_1539	10	27154062	27600561	446500	DEL	ENSBTAG00000035758	OR4K15	olfactory receptor family 4 subfamily K member 15 [Source:HGNC Symbol;Acc:HGNC:15353]	Paralogs	protein_coding	Entire gene
CNVR_1539	10	27154062	27600561	446500	DEL	ENSBTAG00000037411			Paralogs	protein_coding	Entire gene
CNVR_1539	10	27154062	27600561	446500	DEL	ENSBTAG00000037511			Paralogs	protein_coding	Entire gene
CNVR_1539	10	27154062	27600561	446500	DEL	ENSBTAG00000038672			Paralogs	protein_coding	Entire gene
CNVR_1539	10	27154062	27600561	446500	DEL	ENSBTAG00000039120			Paralogs	protein_coding	Entire gene
CNVR_1539	10	27154062	27600561	446500	DEL	ENSBTAG00000039370	OR4K1	olfactory receptor family 4 subfamily K member 1 [Source:HGNC Symbol;Acc:HGNC:14726]	Paralogs	protein_coding	Entire gene
CNVR_1539	10	27154062	27600561	446500	DEL	ENSBTAG00000046390			Paralogs	protein_coding	Entire gene
CNVR_1539	10	27154062	27600561	446500	DEL	ENSBTAG00000046488	OR4N5	olfactory receptor family 4 subfamily N member 5 [Source:HGNC Symbol;Acc:HGNC:15358]	Paralogs	protein_coding	Entire gene
CNVR_1539	10	27154062	27600561	446500	DEL	ENSBTAG00000046651			Paralogs	protein_coding	Entire gene
CNVR_1539	10	27154062	27600561	446500	DEL	ENSBTAG00000047311			Paralogs	protein_coding	Entire gene
CNVR_1539	10	27154062	27600561	446500	DEL	ENSBTAG00000047802	OR4L1	olfactory receptor family 4 subfamily L member 1 [Source:HGNC Symbol;Acc:HGNC:15356]	Paralogs	protein_coding	Entire gene
CNVR_1552	10	27634201	27663250	29050	DEL	ENSBTAG00000047348			Paralogs	protein_coding	Entire gene
CNVR_1552	10	27634201	27663250	29050	DEL	ENSBTAG00000047984			Paralogs	protein_coding	Entire gene
CNVR_1555	10	27726501	27737750	11250	DUP	ENSBTAG00000046370			Paralogs	protein_coding	3' UTR
CNVR_1576	10	28131501	28140000	8500	DEL	ENSBTAG00000038083			Paralogs	protein_coding	Entire gene
CNVR_1624	10	37966427	37967809	1383	DEL	ENSBTAG00000005661	SNAP23	synaptosome associated protein 23 [Source:HGNC Symbol;Acc:HGNC:11131]	Paralogs	protein_coding	Intron
CNVR_1643	10	40082290	40083216	927	DEL	ENSBTAG00000005697	MDGA2	MAM domain containing glycosylphosphatidylinositol anchor 2 [Source:HGNC Symbol;Acc:HGNC:19835]	Paralogs	protein_coding	Intron
CNVR_1648	10	40435093	40436919	1827	DEL	ENSBTAG00000005697	MDGA2	MAM domain containing glycosylphosphatidylinositol anchor 2 [Source:HGNC Symbol;Acc:HGNC:19835]	Paralogs	protein_coding	Intron
CNVR_1667	10	43408374	43441595	33222	DEL	ENSBTAG00000014792	MAP4K5	mitogen-activated protein kinase kinase kinase kinase 5 [Source:HGNC Symbol;Acc:HGNC:6867]	Paralogs	protein_coding	Some exons
CNVR_1673	10	44065750	44205215	139466	DEL	ENSBTAG00000011225	TMX1	thioredoxin related transmembrane protein 1 [Source:HGNC Symbol;Acc:HGNC:15487]	Paralogs	protein_coding	Entire gene
CNVR_1678	10	44399001	44403000	4000	DEL	ENSBTAG00000031707	FRMD6	FERM domain containing 6 [Source:HGNC Symbol;Acc:HGNC:19839]	Paralogs	protein_coding	Intron
CNVR_1681	10	45542961	45544272	1312	DEL	ENSBTAG00000015808	ZNF609	zinc finger protein 609 [Source:HGNC Symbol;Acc:HGNC:29003]	Paralogs	protein_coding	Intron
CNVR_1695	10	48197247	48197934	688	DEL	ENSBTAG00000038920	VPS13C	vacuolar protein sorting 13 homolog C [Source:HGNC Symbol;Acc:HGNC:23594]	Paralogs	protein_coding	Intron
CNVR_1728	10	55725751	55727603	1853	DEL	ENSBTAG00000025522	UNC13C	unc-13 homolog C [Source:HGNC Symbol;Acc:HGNC:23149]	Paralogs	protein_coding	Intron
CNVR_1729	10	55923463	55925374	1912	DEL	ENSBTAG00000025522	UNC13C	unc-13 homolog C [Source:HGNC Symbol;Acc:HGNC:23149]	Paralogs	protein_coding	Intron
CNVR_1733	10	56016818	56017483	666	DEL	ENSBTAG00000025522	UNC13C	unc-13 homolog C [Source:HGNC Symbol;Acc:HGNC:23149]	Paralogs	protein_coding	Intron
CNVR_1735	10	56117271	56118500	1230	DEL	ENSBTAG00000025522	UNC13C	unc-13 homolog C [Source:HGNC Symbol;Acc:HGNC:23149]	Paralogs	protein_coding	Intron
CNVR_1736	10	56179726	56181600	1875	DEL	ENSBTAG00000025522	UNC13C	unc-13 homolog C [Source:HGNC Symbol;Acc:HGNC:23149]	Paralogs	protein_coding	Intron
CNVR_1758	10	59267860	59268612	753	DEL	ENSBTAG00000014890	CYP19A1	cytochrome P450 family 19 subfamily A member 1 [Source:HGNC Symbol;Acc:HGNC:2594]	Paralogs	protein_coding	Intron
CNVR_1774	10	61250186	61251691	1506	DEL	ENSBTAG00000004011	GALK2	galactokinase 2 [Source:HGNC Symbol;Acc:HGNC:4119]	Paralogs	protein_coding	Intron
CNVR_1803	10	66349491	66351369	1879	DEL	ENSBTAG00000043487	U6	U6 spliceosomal RNA [Source:RFAM;Acc:RF00026]	Paralogs	snRNA	Entire gene
CNVR_1808	10	67592859	67593467	609	DEL	ENSBTAG00000040151	GCH1	GTP cyclohydrolase 1 [Source:HGNC Symbol;Acc:HGNC:4193]	No_Paralogs	protein_coding	Intron
CNVR_13246	3	41237073	48958884	7721812	DEL	ENSBTAG00000004422	ALG14	ALG14, UDP-N-acetylglucosaminyltransferase subunit [Source:HGNC Symbol;Acc:HGNC:28287]	No_Paralogs	protein_coding	Entire gene
CNVR_1826	10	74392481	74393341	861	DEL	ENSBTAG00000018947	SYT16	synaptotagmin 16 [Source:HGNC Symbol;Acc:HGNC:23142]	Paralogs	protein_coding	Intron
CNVR_1840	10	76486948	76488250	1303	DEL	ENSBTAG00000025450	SYNE2	nesprin-2 [Source:RefSeq peptide;Acc:NP_001193515]	Paralogs	protein_coding	Some exons
CNVR_1877	10	84341037	84342805	1769	DEL	ENSBTAG00000014189	RGS6	regulator of G protein signaling 6 [Source:HGNC Symbol;Acc:HGNC:10002]	Paralogs	protein_coding	Some exons
CNVR_1893	10	87169156	87898530	729375	DEL	ENSBTAG00000011985	FLVCR2		Paralogs	protein_coding	Some exons
CNVR_1893	10	87169156	87898530	729375	DEL	ENSBTAG00000040078		feline leukemia virus subgroup C receptor-related protein 2 [Source:RefSeq peptide;Acc:NP_001179072]	Paralogs	protein_coding	3' UTR
CNVR_7619	2	5706778	7047584	1340807	DEL	ENSBTAG00000012554	ANKAR	ankyrin and armadillo repeat containing [Source:HGNC Symbol;Acc:HGNC:26350]	No_Paralogs	protein_coding	Entire gene
CNVR_1893	10	87169156	87898530	729375	DEL	ENSBTAG00000015797			No_Paralogs	pseudogene	Entire gene
CNVR_1893	10	87169156	87898530	729375	DEL	ENSBTAG00000026909			Paralogs	protein_coding	Entire gene
CNVR_1893	10	87169156	87898530	729375	DEL	ENSBTAG00000035662	CAMK4		Paralogs	protein_coding	Entire gene
CNVR_1893	10	87169156	87898530	729375	DEL	ENSBTAG00000045886	STARD4	StAR related lipid transfer domain containing 4 [Source:HGNC Symbol;Acc:HGNC:18058]	Paralogs	protein_coding	Entire gene
CNVR_1925	10	91916174	91917254	1081	DEL	ENSBTAG00000025324	NRXN3		Paralogs	protein_coding	Intron
CNVR_1926	10	91989648	91990437	790	DEL	ENSBTAG00000025324	NRXN3		Paralogs	protein_coding	Intron
CNVR_1927	10	91989789	91990437	649	DEL	ENSBTAG00000025324	NRXN3		Paralogs	protein_coding	Intron
CNVR_1935	10	93468901	93474919	6019	DEL	ENSBTAG00000017489	TSHR	thyroid stimulating hormone receptor [Source:HGNC Symbol;Acc:HGNC:12373]	Paralogs	protein_coding	Intron
CNVR_2018	10	104139860	104140742	883	DEL	ENSBTAG00000012330	B2M	Beta-2-microglobulin [Source:UniProtKB/Swiss-Prot;Acc:P01888]	No_Paralogs	protein_coding	Intron
CNVR_2021	11	868	72764	71897	DEL	ENSBTAG00000020646	ZC3H6	zinc finger CCCH-type containing 6 [Source:HGNC Symbol;Acc:HGNC:24762]	Paralogs	protein_coding	Some exons
CNVR_2021	11	868	72764	71897	DEL	ENSBTAG00000038257			Paralogs	protein_coding	Entire gene
CNVR_2031	11	573001	574342	1342	DEL	ENSBTAG00000027991	ANAPC1	anaphase promoting complex subunit 1 [Source:HGNC Symbol;Acc:HGNC:19988]	No_Paralogs	protein_coding	Intron
CNVR_2045	11	2124361	2125398	1038	DEL	ENSBTAG00000011553			Paralogs	protein_coding	Intron
CNVR_2046	11	2137111	2138167	1057	DEL	ENSBTAG00000011558	GPAT2	glycerol-3-phosphate acyltransferase 2, mitochondrial [Source:RefSeq peptide;Acc:NP_001179563]	Paralogs	protein_coding	Intron
CNVR_2051	11	2900294	2902000	1707	DEL	ENSBTAG00000006019	FAM178B	family with sequence similarity 178 member B [Source:HGNC Symbol;Acc:HGNC:28036]	Paralogs	protein_coding	Intron
CNVR_2052	11	3027222	3028270	1049	DEL	ENSBTAG00000005892	ZAP70	zeta chain of T-cell receptor associated protein kinase 70 [Source:HGNC Symbol;Acc:HGNC:12858]	Paralogs	protein_coding	Intron
CNVR_2054	11	3425627	3426603	977	DEL	ENSBTAG00000034384	VWA3B	von Willebrand factor A domain containing 3B [Source:HGNC Symbol;Acc:HGNC:28385]	Paralogs	protein_coding	Intron
CNVR_2062	11	4898400	5538717	640318	DEL	ENSBTAG00000004327	LONRF2	LON peptidase N-terminal domain and ring finger 2 [Source:HGNC Symbol;Acc:HGNC:24788]	Paralogs	protein_coding	Entire gene
CNVR_2062	11	4898400	5538717	640318	DEL	ENSBTAG00000004328	CHST10	carbohydrate sulfotransferase 10 [Source:HGNC Symbol;Acc:HGNC:19650]	Paralogs	protein_coding	Entire gene
CNVR_10026	23	17866625	21861674	3995050	CNV	ENSBTAG00000047009	ANKRD66	ankyrin repeat domain 66 [Source:HGNC Symbol;Acc:HGNC:44669]	No_Paralogs	protein_coding	Entire gene
CNVR_2090	11	9593501	9598750	5250	DEL	ENSBTAG00000015575	TACR1	tachykinin receptor 1 [Source:HGNC Symbol;Acc:HGNC:11526]	Paralogs	protein_coding	Intron
CNVR_2121	11	14163148	14165150	2003	DEL	ENSBTAG00000008674		Protein FAM136A [Source:UniProtKB/Swiss-Prot;Acc:Q2HJI3]	Paralogs	protein_coding	Some exons
CNVR_2151	11	19423477	19425150	1674	DEL	ENSBTAG00000018590	STRN	striatin [Source:HGNC Symbol;Acc:HGNC:11424]	Paralogs	protein_coding	Intron
CNVR_2164	11	21643636	21644456	821	DEL	ENSBTAG00000016442	MAP4K3	mitogen-activated protein kinase kinase kinase kinase 3 [Source:HGNC Symbol;Acc:HGNC:6865]	Paralogs	protein_coding	Intron
CNVR_11971	28	2275709	4192646	1916938	DEL	ENSBTAG00000021822	ARV1	ARV1 homolog, fatty acid homeostasis modulator [Source:HGNC Symbol;Acc:HGNC:29561]	No_Paralogs	protein_coding	Entire gene
CNVR_2196	11	27849112	31324038	3474927	DEL	ENSBTAG00000001425	FBXO11	F-box only protein 11 [Source:RefSeq peptide;Acc:NP_001095364]	Paralogs	protein_coding	Entire gene
CNVR_2196	11	27849112	31324038	3474927	DEL	ENSBTAG00000001575	CALM2		Paralogs	protein_coding	Entire gene
CNVR_13877	4	12871015	18058404	5187390	DEL	ENSBTAG00000003222	ASNS	asparagine synthetase	No_Paralogs	protein_coding	Entire gene
CNVR_7619	2	5706778	7047584	1340807	DEL	ENSBTAG00000000492	ASNSD1	asparagine synthetase domain containing 1 [Source:HGNC Symbol;Acc:HGNC:24910]	No_Paralogs	protein_coding	Entire gene
CNVR_3635	13	10960139	17846162	6886024	DEL	ENSBTAG00000013930	ATP5C1	ATP synthase, H+ transporting, mitochondrial F1 complex, gamma polypeptide 1 [Source:HGNC Symbol;Acc:HGNC:833]	No_Paralogs	protein_coding	Entire gene
CNVR_2196	11	27849112	31324038	3474927	DEL	ENSBTAG00000003711	EPAS1	endothelial PAS domain protein 1 [Source:HGNC Symbol;Acc:HGNC:3374]	Paralogs	protein_coding	Entire gene
CNVR_6716	18	13361001	13441037	80037	DUP	ENSBTAG00000023745	BANP	protein BANP [Source:RefSeq peptide;Acc:NP_001069088]	No_Paralogs	protein_coding	Some exons
CNVR_2196	11	27849112	31324038	3474927	DEL	ENSBTAG00000004168		stonin 1 [Source:HGNC Symbol;Acc:HGNC:17003]	Paralogs	protein_coding	Entire gene
CNVR_2196	11	27849112	31324038	3474927	DEL	ENSBTAG00000006474	EPCAM	epithelial cell adhesion molecule [Source:HGNC Symbol;Acc:HGNC:11529]	Paralogs	protein_coding	Entire gene
CNVR_2196	11	27849112	31324038	3474927	DEL	ENSBTAG00000008987	SOCS5	suppressor of cytokine signaling 5 [Source:HGNC Symbol;Acc:HGNC:16852]	Paralogs	protein_coding	Entire gene
CNVR_2196	11	27849112	31324038	3474927	DEL	ENSBTAG00000013734	ATP6V1E2	ATPase H+ transporting V1 subunit E2 [Source:HGNC Symbol;Acc:HGNC:18125]	Paralogs	protein_coding	Entire gene
CNVR_2196	11	27849112	31324038	3474927	DEL	ENSBTAG00000013749	RHOQ	rho-related GTP-binding protein RhoQ [Source:RefSeq peptide;Acc:NP_001192427]	Paralogs	protein_coding	Entire gene
CNVR_2196	11	27849112	31324038	3474927	DEL	ENSBTAG00000015151	FOXN2	forkhead box N2 [Source:HGNC Symbol;Acc:HGNC:5281]	Paralogs	protein_coding	Entire gene
CNVR_15659	6	3371815	3400234	28420	DEL	ENSBTAG00000004945	BBS7	Bardet-Biedl syndrome 7 protein [Source:RefSeq peptide;Acc:NP_001178275]	No_Paralogs	protein_coding	Some exons
CNVR_12289	29	1033483	1034452	970	DEL	ENSBTAG00000003550	C11orf54	chromosome 11 open reading frame 54 [Source:HGNC Symbol;Acc:HGNC:30204]	No_Paralogs	protein_coding	Some exons
CNVR_2196	11	27849112	31324038	3474927	DEL	ENSBTAG00000016573			Paralogs	protein_coding	Entire gene
CNVR_2196	11	27849112	31324038	3474927	DEL	ENSBTAG00000017500	KCNK12	potassium two pore domain channel subfamily K member 12 [Source:HGNC Symbol;Acc:HGNC:6274]	Paralogs	protein_coding	Entire gene
CNVR_2196	11	27849112	31324038	3474927	DEL	ENSBTAG00000020614	PRKCE	protein kinase C epsilon [Source:HGNC Symbol;Acc:HGNC:9401]	Paralogs	protein_coding	Entire gene
CNVR_2196	11	27849112	31324038	3474927	DEL	ENSBTAG00000023999	GTF2A1L	general transcription factor IIA subunit 1 like [Source:HGNC Symbol;Acc:HGNC:30727]	Paralogs	protein_coding	Entire gene
CNVR_2196	11	27849112	31324038	3474927	DEL	ENSBTAG00000027015			Paralogs	protein_coding	Entire gene
CNVR_2196	11	27849112	31324038	3474927	DEL	ENSBTAG00000032424	FSHR	follicle stimulating hormone receptor [Source:HGNC Symbol;Acc:HGNC:3969]	Paralogs	protein_coding	Entire gene
CNVR_2196	11	27849112	31324038	3474927	DEL	ENSBTAG00000032558	TTC7A	tetratricopeptide repeat domain 7A [Source:HGNC Symbol;Acc:HGNC:19750]	Paralogs	protein_coding	Entire gene
CNVR_2196	11	27849112	31324038	3474927	DEL	ENSBTAG00000042135	SNORA48	Small nucleolar RNA SNORA48 [Source:RFAM;Acc:RF00554]	Paralogs	snoRNA	Entire gene
CNVR_2196	11	27849112	31324038	3474927	DEL	ENSBTAG00000045935			No_Paralogs	miRNA	Entire gene
CNVR_2196	11	27849112	31324038	3474927	DEL	ENSBTAG00000047160			No_Paralogs	miRNA	Entire gene
CNVR_2196	11	27849112	31324038	3474927	DEL	ENSBTAG00000007508	SRBD1	S1 RNA-binding domain-containing protein 1 [Source:RefSeq peptide;Acc:NP_001192701]	No_Paralogs	protein_coding	5' UTR
CNVR_2198	11	28157856	28158859	1004	DEL	ENSBTAG00000020614	PRKCE	protein kinase C epsilon [Source:HGNC Symbol;Acc:HGNC:9401]	Paralogs	protein_coding	Intron
CNVR_2214	11	31179623	31180476	854	DEL	ENSBTAG00000032424	FSHR	follicle stimulating hormone receptor [Source:HGNC Symbol;Acc:HGNC:3969]	Paralogs	protein_coding	Intron
CNVR_2254	11	36296701	36309000	12300	DEL	ENSBTAG00000019458			Paralogs	protein_coding	Intron
CNVR_2256	11	37404174	37406100	1927	DEL	ENSBTAG00000011101	EML6	echinoderm microtubule associated protein like 6 [Source:HGNC Symbol;Acc:HGNC:35412]	Paralogs	protein_coding	Intron
CNVR_2260	11	37805151	37805748	598	DEL	ENSBTAG00000000295	CLHC1	clathrin heavy chain linker domain containing 1 [Source:HGNC Symbol;Acc:HGNC:26453]	No_Paralogs	protein_coding	Intron
CNVR_2329	11	49048548	49096200	47653	CNV	ENSBTAG00000047816			Paralogs	protein_coding	Some exons
CNVR_2329	11	49048548	49096200	47653	CNV	ENSBTAG00000039981			No_Paralogs	pseudogene	Entire gene
CNVR_2329	11	49048548	49096200	47653	CNV	ENSBTAG00000047449			Paralogs	protein_coding	Entire gene
CNVR_2330	11	49067052	49108000	40949	DEL	ENSBTAG00000039981			No_Paralogs	pseudogene	Entire gene
CNVR_2330	11	49067052	49108000	40949	DEL	ENSBTAG00000047816			Paralogs	protein_coding	Entire gene
CNVR_2343	11	50436826	50437203	378	DEL	ENSBTAG00000006075	SUCLG1	succinate-CoA ligase alpha subunit [Source:HGNC Symbol;Acc:HGNC:11449]	Paralogs	protein_coding	Intron
CNVR_2352	11	50803830	51466114	662285	DEL	ENSBTAG00000043685	7SK	7SK RNA [Source:RFAM;Acc:RF00100]	Paralogs	misc_RNA	Entire gene
CNVR_2352	11	50803830	51466114	662285	DEL	ENSBTAG00000043701	5S_rRNA	5S ribosomal RNA [Source:RFAM;Acc:RF00001]	Paralogs	rRNA	Entire gene
CNVR_2443	11	60468296	61554230	1085935	DEL	ENSBTAG00000019867	COMMD1	copper metabolism domain containing 1 [Source:HGNC Symbol;Acc:HGNC:23024]	No_Paralogs	protein_coding	3' UTR
CNVR_12290	29	1033541	1041467	7927	DEL	ENSBTAG00000003550	C11orf54	chromosome 11 open reading frame 54 [Source:HGNC Symbol;Acc:HGNC:30204]	No_Paralogs	protein_coding	Some exons
CNVR_2443	11	60468296	61554230	1085935	DEL	ENSBTAG00000006760	OTX1	orthodenticle homeobox 1 [Source:HGNC Symbol;Acc:HGNC:8521]	Paralogs	protein_coding	Entire gene
CNVR_2443	11	60468296	61554230	1085935	DEL	ENSBTAG00000018046			Paralogs	protein_coding	Entire gene
CNVR_2443	11	60468296	61554230	1085935	DEL	ENSBTAG00000044173	EHBP1	EH domain binding protein 1 [Source:HGNC Symbol;Acc:HGNC:29144]	Paralogs	protein_coding	Entire gene
CNVR_2448	11	61321995	61327000	5006	DEL	ENSBTAG00000044173	EHBP1	EH domain binding protein 1 [Source:HGNC Symbol;Acc:HGNC:29144]	Paralogs	protein_coding	Intron
CNVR_2463	11	62499388	62500302	915	DEL	ENSBTAG00000020865	PELI1	pellino E3 ubiquitin protein ligase 1 [Source:HGNC Symbol;Acc:HGNC:8827]	Paralogs	protein_coding	Intron
CNVR_2492	11	69255286	69256612	1327	DEL	ENSBTAG00000005014	LCLAT1	lysocardiolipin acyltransferase 1 [Source:HGNC Symbol;Acc:HGNC:26756]	Paralogs	protein_coding	Intron
CNVR_2493	11	69296094	69297800	1707	DEL	ENSBTAG00000005014	LCLAT1	lysocardiolipin acyltransferase 1 [Source:HGNC Symbol;Acc:HGNC:26756]	Paralogs	protein_coding	Intron
CNVR_2506	11	71716880	71717963	1084	DEL	ENSBTAG00000031335	BRE	BRISC and BRCA1 A complex member 2 [Source:HGNC Symbol;Acc:HGNC:1106]	No_Paralogs	protein_coding	Intron
CNVR_2509	11	72801778	72802677	900	DEL	ENSBTAG00000018761	SLC35F6	solute carrier family 35 member F6 [Source:HGNC Symbol;Acc:HGNC:26055]	No_Paralogs	protein_coding	Intron
CNVR_2516	11	75208189	76902690	1694502	DEL	ENSBTAG00000017255	ATAD2B	ATPase family AAA domain-containing protein 2B [Source:RefSeq peptide;Acc:NP_001193679]	Paralogs	protein_coding	3' UTR
CNVR_2516	11	75208189	76902690	1694502	DEL	ENSBTAG00000021969	KLHL29	kelch like family member 29 [Source:HGNC Symbol;Acc:HGNC:29404]	Paralogs	protein_coding	Entire gene
CNVR_2516	11	75208189	76902690	1694502	DEL	ENSBTAG00000042219	U6	U6 spliceosomal RNA [Source:RFAM;Acc:RF00026]	Paralogs	snRNA	Entire gene
CNVR_2517	11	75296974	75297965	992	DEL	ENSBTAG00000021969	KLHL29	kelch like family member 29 [Source:HGNC Symbol;Acc:HGNC:29404]	Paralogs	protein_coding	Intron
CNVR_2518	11	75303832	75305812	1981	DEL	ENSBTAG00000021969	KLHL29	kelch like family member 29 [Source:HGNC Symbol;Acc:HGNC:29404]	Paralogs	protein_coding	Intron
CNVR_2554	11	82943965	82945840	1876	DEL	ENSBTAG00000014081	NBAS	neuroblastoma amplified sequence [Source:HGNC Symbol;Acc:HGNC:15625]	No_Paralogs	protein_coding	Intron
CNVR_2556	11	84073751	84078500	4750	DEL	ENSBTAG00000019284			No_Paralogs	processed_pseudogene	Entire gene
CNVR_2577	11	87868978	87870782	1805	DEL	ENSBTAG00000002108	YWHAQ	14-3-3 protein theta [Source:UniProtKB/Swiss-Prot;Acc:Q3SZI4]	Paralogs	protein_coding	Some exons
CNVR_2603	11	93076651	93077531	881	DEL	ENSBTAG00000005525	LHX6	LIM homeobox 6 [Source:HGNC Symbol;Acc:HGNC:21735]	Paralogs	protein_coding	Intron
CNVR_2616	11	93826751	93840300	13550	DEL	ENSBTAG00000038822			No_Paralogs	pseudogene	Entire gene
CNVR_2622	11	95522579	95523600	1022	DEL	ENSBTAG00000009017	NR5A1	nuclear receptor subfamily 5 group A member 1 [Source:HGNC Symbol;Acc:HGNC:7983]	Paralogs	protein_coding	Intron
CNVR_2631	11	99359900	99363139	3240	DEL	ENSBTAG00000036101	CCBL1	Bos taurus cysteine conjugate-beta lyase, cytoplasmic	Paralogs	protein_coding	Intron
CNVR_6730	18	15506516	21364612	5858097	DEL	ENSBTAG00000008720	C16orf78	uncharacterized protein C16orf78 homolog [Source:RefSeq peptide;Acc:NP_001073116]	No_Paralogs	protein_coding	Entire gene
CNVR_2644	11	102176026	102177308	1283	DEL	ENSBTAG00000000382	MED27	mediator complex subunit 27 [Source:HGNC Symbol;Acc:HGNC:2377]	No_Paralogs	protein_coding	Intron
CNVR_2646	11	102539853	102540690	838	DEL	ENSBTAG00000019254	CFAP77	cilia and flagella associated protein 77 [Source:HGNC Symbol;Acc:HGNC:33776]	No_Paralogs	protein_coding	Intron
CNVR_2655	11	104235753	104237512	1760	DEL	ENSBTAG00000042565	U6	U6 spliceosomal RNA [Source:RFAM;Acc:RF00026]	Paralogs	snRNA	Entire gene
CNVR_2655	11	104235753	104237512	1760	DEL	ENSBTAG00000012525	ABO	histo-blood group ABO system transferase [Source:RefSeq peptide;Acc:NP_001071394]	Paralogs	protein_coding	Intron
CNVR_2666	11	106134704	106150500	15797	DEL	ENSBTAG00000046775	MAN1B1	mannosidase alpha class 1B member 1 [Source:HGNC Symbol;Acc:HGNC:6823]	Paralogs	protein_coding	Some exons
CNVR_2707	12	1662983	1666125	3143	DEL	ENSBTAG00000009308	TDRD3	tudor domain containing 3 [Source:HGNC Symbol;Acc:HGNC:20612]	No_Paralogs	protein_coding	Intron
CNVR_2744	12	4034501	4036800	2300	DEL	ENSBTAG00000029683	U1	U1 spliceosomal RNA [Source:RFAM;Acc:RF00003]	Paralogs	snRNA	Entire gene
CNVR_2744	12	4034501	4036800	2300	DEL	ENSBTAG00000044554	U6	U6 spliceosomal RNA [Source:RFAM;Acc:RF00026]	Paralogs	snRNA	Entire gene
CNVR_2824	12	11829251	11833381	4131	DEL	ENSBTAG00000001133	VWA8	von Willebrand factor A domain containing 8 [Source:HGNC Symbol;Acc:HGNC:29071]	No_Paralogs	protein_coding	Intron
CNVR_12945	3	5779846	7464429	1684584	DEL	ENSBTAG00000010174	C1orf111	spermatogenesis associated 46 [Source:HGNC Symbol;Acc:HGNC:27648]	No_Paralogs	protein_coding	Entire gene
CNVR_2826	12	11900233	11900844	612	DEL	ENSBTAG00000001133	VWA8	von Willebrand factor A domain containing 8 [Source:HGNC Symbol;Acc:HGNC:29071]	No_Paralogs	protein_coding	Intron
CNVR_2829	12	11997001	11998288	1288	DEL	ENSBTAG00000001133	VWA8	von Willebrand factor A domain containing 8 [Source:HGNC Symbol;Acc:HGNC:29071]	No_Paralogs	protein_coding	Intron
CNVR_2891	12	22906751	22975250	68500	DEL	ENSBTAG00000042473	SNORA48	Small nucleolar RNA SNORA48 [Source:RFAM;Acc:RF00554]	Paralogs	snoRNA	Entire gene
CNVR_2891	12	22906751	22975250	68500	DEL	ENSBTAG00000034033	LHFP	lipoma HMGIC fusion partner [Source:HGNC Symbol;Acc:HGNC:6586]	Paralogs	protein_coding	Intron
CNVR_2893	12	23001001	23010000	9000	DEL	ENSBTAG00000034033	LHFP	lipoma HMGIC fusion partner [Source:HGNC Symbol;Acc:HGNC:6586]	Paralogs	protein_coding	Intron
CNVR_2898	12	24153939	24155455	1517	DEL	ENSBTAG00000009405	TRPC4	transient receptor potential cation channel subfamily C member 4 [Source:HGNC Symbol;Acc:HGNC:12336]	Paralogs	protein_coding	Intron
CNVR_2919	12	31191675	31195000	3326	DEL	ENSBTAG00000001094	MTUS2	microtubule associated scaffold protein 2 [Source:HGNC Symbol;Acc:HGNC:20595]	Paralogs	protein_coding	Intron
CNVR_2921	12	31253430	31255552	2123	DEL	ENSBTAG00000001094	MTUS2	microtubule associated scaffold protein 2 [Source:HGNC Symbol;Acc:HGNC:20595]	Paralogs	protein_coding	Intron
CNVR_3012	12	44394798	44396171	1374	DEL	ENSBTAG00000008647	KLHL1	kelch like family member 1 [Source:HGNC Symbol;Acc:HGNC:6352]	Paralogs	protein_coding	Intron
CNVR_3138	12	61174243	64062659	2888417	DEL	ENSBTAG00000010129	SLITRK5	SLIT and NTRK like family member 5 [Source:HGNC Symbol;Acc:HGNC:20295]	Paralogs	protein_coding	Entire gene
CNVR_11971	28	2275709	4192646	1916938	DEL	ENSBTAG00000010765	C1orf131	chromosome 1 open reading frame 131 [Source:HGNC Symbol;Acc:HGNC:25332]	No_Paralogs	protein_coding	Entire gene
CNVR_3201	12	67010591	67011160	570	DEL	ENSBTAG00000008708	GPC5	glypican 5 [Source:HGNC Symbol;Acc:HGNC:4453]	Paralogs	protein_coding	Intron
CNVR_3213	12	68372251	68373922	1672	DEL	ENSBTAG00000040347			No_Paralogs	protein_coding	Intron
CNVR_3216	12	68567001	68568272	1272	DEL	ENSBTAG00000040347			No_Paralogs	protein_coding	Intron
CNVR_3220	12	69507749	69511093	3345	DEL	ENSBTAG00000002300	DCT	dopachrome tautomerase [Source:HGNC Symbol;Acc:HGNC:2709]	Paralogs	protein_coding	Intron
CNVR_3240	12	70701119	76652818	5951700	DEL	ENSBTAG00000023309			Paralogs	protein_coding	Entire gene
CNVR_3240	12	70701119	76652818	5951700	DEL	ENSBTAG00000026070			Paralogs	protein_coding	Entire gene
CNVR_3240	12	70701119	76652818	5951700	DEL	ENSBTAG00000039714			Paralogs	protein_coding	Entire gene
CNVR_3240	12	70701119	76652818	5951700	DEL	ENSBTAG00000045751			Paralogs	protein_coding	Entire gene
CNVR_3240	12	70701119	76652818	5951700	DEL	ENSBTAG00000046041			Paralogs	protein_coding	Entire gene
CNVR_3240	12	70701119	76652818	5951700	DEL	ENSBTAG00000047181			Paralogs	protein_coding	Entire gene
CNVR_3240	12	70701119	76652818	5951700	DEL	ENSBTAG00000047360			No_Paralogs	pseudogene	Entire gene
CNVR_3240	12	70701119	76652818	5951700	DEL	ENSBTAG00000047383			Paralogs	protein_coding	Entire gene
CNVR_3240	12	70701119	76652818	5951700	DEL	ENSBTAG00000047764			Paralogs	protein_coding	Entire gene
CNVR_3252	12	71394890	74775070	3380181	CNV	ENSBTAG00000045751			Paralogs	protein_coding	Entire gene
CNVR_3252	12	71394890	74775070	3380181	CNV	ENSBTAG00000046041			Paralogs	protein_coding	Entire gene
CNVR_3252	12	71394890	74775070	3380181	CNV	ENSBTAG00000047181			Paralogs	protein_coding	Entire gene
CNVR_3252	12	71394890	74775070	3380181	CNV	ENSBTAG00000047360			No_Paralogs	pseudogene	Entire gene
CNVR_3252	12	71394890	74775070	3380181	CNV	ENSBTAG00000047383			Paralogs	protein_coding	Entire gene
CNVR_3252	12	71394890	74775070	3380181	CNV	ENSBTAG00000047764			Paralogs	protein_coding	Entire gene
CNVR_3256	12	71598333	73590748	1992416	DEL	ENSBTAG00000046041			Paralogs	protein_coding	Some exons
CNVR_3256	12	71598333	73590748	1992416	DEL	ENSBTAG00000045751			Paralogs	protein_coding	Entire gene
CNVR_3256	12	71598333	73590748	1992416	DEL	ENSBTAG00000047181			Paralogs	protein_coding	Entire gene
CNVR_3256	12	71598333	73590748	1992416	DEL	ENSBTAG00000047383			Paralogs	protein_coding	Entire gene
CNVR_3271	12	72125033	72125841	809	DEL	ENSBTAG00000045751			Paralogs	protein_coding	Intron
CNVR_3280	12	72399731	74811010	2411280	DEL	ENSBTAG00000046041			Paralogs	protein_coding	Entire gene
CNVR_3280	12	72399731	74811010	2411280	DEL	ENSBTAG00000047181			Paralogs	protein_coding	Entire gene
CNVR_3280	12	72399731	74811010	2411280	DEL	ENSBTAG00000047360			No_Paralogs	pseudogene	Entire gene
CNVR_3280	12	72399731	74811010	2411280	DEL	ENSBTAG00000047764			Paralogs	protein_coding	Entire gene
CNVR_3296	12	73086913	76740539	3653627	CNV	ENSBTAG00000023309			Paralogs	protein_coding	Entire gene
CNVR_3296	12	73086913	76740539	3653627	CNV	ENSBTAG00000026070			Paralogs	protein_coding	Entire gene
CNVR_3296	12	73086913	76740539	3653627	CNV	ENSBTAG00000039714			Paralogs	protein_coding	Entire gene
CNVR_3296	12	73086913	76740539	3653627	CNV	ENSBTAG00000046041			Paralogs	protein_coding	Entire gene
CNVR_3296	12	73086913	76740539	3653627	CNV	ENSBTAG00000047360			No_Paralogs	pseudogene	Entire gene
CNVR_3296	12	73086913	76740539	3653627	CNV	ENSBTAG00000047764			Paralogs	protein_coding	Entire gene
CNVR_3298	12	73087927	75948680	2860754	CNV	ENSBTAG00000023309			Paralogs	protein_coding	Entire gene
CNVR_3298	12	73087927	75948680	2860754	CNV	ENSBTAG00000026070			Paralogs	protein_coding	Entire gene
CNVR_3298	12	73087927	75948680	2860754	CNV	ENSBTAG00000039714			Paralogs	protein_coding	Entire gene
CNVR_3298	12	73087927	75948680	2860754	CNV	ENSBTAG00000046041			Paralogs	protein_coding	Entire gene
CNVR_3298	12	73087927	75948680	2860754	CNV	ENSBTAG00000047360			No_Paralogs	pseudogene	Entire gene
CNVR_3298	12	73087927	75948680	2860754	CNV	ENSBTAG00000047764			Paralogs	protein_coding	Entire gene
CNVR_3299	12	73109488	74824053	1714566	CNV	ENSBTAG00000023309			Paralogs	protein_coding	Some exons
CNVR_3299	12	73109488	74824053	1714566	CNV	ENSBTAG00000046041			Paralogs	protein_coding	Entire gene
CNVR_3299	12	73109488	74824053	1714566	CNV	ENSBTAG00000047360			No_Paralogs	pseudogene	Entire gene
CNVR_3299	12	73109488	74824053	1714566	CNV	ENSBTAG00000047764			Paralogs	protein_coding	Entire gene
CNVR_3301	12	73109488	74828228	1718741	CNV	ENSBTAG00000023309			Paralogs	protein_coding	Some exons
CNVR_3301	12	73109488	74828228	1718741	CNV	ENSBTAG00000046041			Paralogs	protein_coding	Entire gene
CNVR_3301	12	73109488	74828228	1718741	CNV	ENSBTAG00000047360			No_Paralogs	pseudogene	Entire gene
CNVR_3301	12	73109488	74828228	1718741	CNV	ENSBTAG00000047764			Paralogs	protein_coding	Entire gene
CNVR_3302	12	73117192	76740539	3623348	DEL	ENSBTAG00000023309			Paralogs	protein_coding	Entire gene
CNVR_3302	12	73117192	76740539	3623348	DEL	ENSBTAG00000026070			Paralogs	protein_coding	Entire gene
CNVR_3302	12	73117192	76740539	3623348	DEL	ENSBTAG00000039714			Paralogs	protein_coding	Entire gene
CNVR_3302	12	73117192	76740539	3623348	DEL	ENSBTAG00000046041			Paralogs	protein_coding	Entire gene
CNVR_3302	12	73117192	76740539	3623348	DEL	ENSBTAG00000047360			No_Paralogs	pseudogene	Entire gene
CNVR_3302	12	73117192	76740539	3623348	DEL	ENSBTAG00000047764			Paralogs	protein_coding	Entire gene
CNVR_3312	12	73088713	76740539	3651827	DEL	ENSBTAG00000023309			Paralogs	protein_coding	Entire gene
CNVR_3312	12	73088713	76740539	3651827	DEL	ENSBTAG00000026070			Paralogs	protein_coding	Entire gene
CNVR_3312	12	73088713	76740539	3651827	DEL	ENSBTAG00000039714			Paralogs	protein_coding	Entire gene
CNVR_3312	12	73088713	76740539	3651827	DEL	ENSBTAG00000046041			Paralogs	protein_coding	Entire gene
CNVR_3312	12	73088713	76740539	3651827	DEL	ENSBTAG00000047360			No_Paralogs	pseudogene	Entire gene
CNVR_3312	12	73088713	76740539	3651827	DEL	ENSBTAG00000047764			Paralogs	protein_coding	Entire gene
CNVR_3322	12	73631815	76281394	2649580	CNV	ENSBTAG00000046041			Paralogs	protein_coding	3' UTR
CNVR_3322	12	73631815	76281394	2649580	CNV	ENSBTAG00000023309			Paralogs	protein_coding	Entire gene
CNVR_3322	12	73631815	76281394	2649580	CNV	ENSBTAG00000026070			Paralogs	protein_coding	Entire gene
CNVR_3322	12	73631815	76281394	2649580	CNV	ENSBTAG00000039714			Paralogs	protein_coding	Entire gene
CNVR_3322	12	73631815	76281394	2649580	CNV	ENSBTAG00000047360			No_Paralogs	pseudogene	Entire gene
CNVR_3322	12	73631815	76281394	2649580	CNV	ENSBTAG00000047764			Paralogs	protein_coding	Entire gene
CNVR_3323	12	73682748	74824256	1141509	DEL	ENSBTAG00000023309			Paralogs	protein_coding	Some exons
CNVR_3323	12	73682748	74824256	1141509	DEL	ENSBTAG00000046041			Paralogs	protein_coding	3' UTR
CNVR_3323	12	73682748	74824256	1141509	DEL	ENSBTAG00000047360			No_Paralogs	pseudogene	Entire gene
CNVR_3323	12	73682748	74824256	1141509	DEL	ENSBTAG00000047764			Paralogs	protein_coding	Entire gene
CNVR_3328	12	73863134	73941169	78036	DEL	ENSBTAG00000047764			Paralogs	protein_coding	Some exons
CNVR_3331	12	73874284	75215075	1340792	CNV	ENSBTAG00000023309			Paralogs	protein_coding	Entire gene
CNVR_3331	12	73874284	75215075	1340792	CNV	ENSBTAG00000047360			No_Paralogs	pseudogene	Entire gene
CNVR_3331	12	73874284	75215075	1340792	CNV	ENSBTAG00000047764			Paralogs	protein_coding	Entire gene
CNVR_3332	12	73950874	74050050	99177	CNV	ENSBTAG00000047764			Paralogs	protein_coding	3' UTR
CNVR_3354	12	74520398	76125380	1604983	DEL	ENSBTAG00000023309			Paralogs	protein_coding	Entire gene
CNVR_3354	12	74520398	76125380	1604983	DEL	ENSBTAG00000026070			Paralogs	protein_coding	Entire gene
CNVR_3354	12	74520398	76125380	1604983	DEL	ENSBTAG00000039714			Paralogs	protein_coding	Entire gene
CNVR_3385	12	75527494	75555391	27898	DEL	ENSBTAG00000026070			Paralogs	protein_coding	3' UTR
CNVR_3392	12	75699260	76652314	953055	CNV	ENSBTAG00000039714			Paralogs	protein_coding	3' UTR
CNVR_3396	12	75788614	76661521	872908	DEL	ENSBTAG00000039714			Paralogs	protein_coding	3' UTR
CNVR_3434	12	76963847	76965669	1823	DEL	ENSBTAG00000012065	DNAJC3	DnaJ heat shock protein family	Paralogs	protein_coding	Intron
CNVR_3436	12	77107029	77109328	2300	DEL	ENSBTAG00000004401	UGGT2	UDP-glucose glycoprotein glucosyltransferase 2 [Source:HGNC Symbol;Acc:HGNC:15664]	Paralogs	protein_coding	Intron
CNVR_3446	12	77988102	77989085	984	DEL	ENSBTAG00000045566			Paralogs	protein_coding	Entire gene
CNVR_3450	12	78435098	78435957	860	DEL	ENSBTAG00000018313	MBNL2	muscleblind like splicing regulator 2 [Source:HGNC Symbol;Acc:HGNC:16746]	Paralogs	protein_coding	Intron
CNVR_3463	12	80545848	80546575	728	DEL	ENSBTAG00000004165	CLYBL	citrate lyase beta like [Source:HGNC Symbol;Acc:HGNC:18355]	No_Paralogs	protein_coding	Intron
CNVR_3474	12	82092445	82093547	1103	DEL	ENSBTAG00000044027	ITGBL1	integrin subunit beta like 1 [Source:HGNC Symbol;Acc:HGNC:6164]	Paralogs	protein_coding	Intron
CNVR_3480	12	83058262	83058756	495	DEL	ENSBTAG00000014043		BIVM-ERCC5 readthrough [Source:HGNC Symbol;Acc:HGNC:43690]	No_Paralogs	protein_coding	Intron
CNVR_3518	12	88067359	88068317	959	DEL	ENSBTAG00000018237	MYO16	myosin XVI [Source:HGNC Symbol;Acc:HGNC:29822]	Paralogs	protein_coding	Intron
CNVR_3532	13	1262	886796	885535	CNV	ENSBTAG00000008338	PLCB1	phospholipase C beta 1 [Source:HGNC Symbol;Acc:HGNC:15917]	Paralogs	protein_coding	Some exons
CNVR_3532	13	1262	886796	885535	CNV	ENSBTAG00000008177			No_Paralogs	pseudogene	Entire gene
CNVR_3532	13	1262	886796	885535	CNV	ENSBTAG00000024139	OR4S2	olfactory receptor family 4 subfamily S member 2 [Source:HGNC Symbol;Acc:HGNC:15183]	Paralogs	protein_coding	Entire gene
CNVR_3532	13	1262	886796	885535	CNV	ENSBTAG00000024141			No_Paralogs	pseudogene	Entire gene
CNVR_3532	13	1262	886796	885535	CNV	ENSBTAG00000024891			Paralogs	protein_coding	Entire gene
CNVR_3532	13	1262	886796	885535	CNV	ENSBTAG00000025720			Paralogs	protein_coding	Entire gene
CNVR_3532	13	1262	886796	885535	CNV	ENSBTAG00000035323			Paralogs	protein_coding	Entire gene
CNVR_3543	13	877880	879149	1270	DEL	ENSBTAG00000008338	PLCB1	phospholipase C beta 1 [Source:HGNC Symbol;Acc:HGNC:15917]	Paralogs	protein_coding	Intron
CNVR_3556	13	1496372	1497254	883	DEL	ENSBTAG00000008338	PLCB1	phospholipase C beta 1 [Source:HGNC Symbol;Acc:HGNC:15917]	Paralogs	protein_coding	Intron
CNVR_3587	13	5335317	5576250	240934	DEL	ENSBTAG00000047779	Sry	Sex-determining region Y protein [Source:UniProtKB/Swiss-Prot;Acc:Q03255]	Paralogs	protein_coding	Entire gene
CNVR_3624	13	9900640	9909240	8601	DEL	ENSBTAG00000034441	MACROD2	O-acetyl-ADP-ribose deacetylase MACROD2 [Source:RefSeq peptide;Acc:NP_001098499]	No_Paralogs	protein_coding	Intron
CNVR_3630	13	10446720	10448169	1450	DEL	ENSBTAG00000000939	KIF16B	kinesin family member 16B [Source:HGNC Symbol;Acc:HGNC:15869]	Paralogs	protein_coding	Intron
CNVR_13552	3	88122610	90088023	1965414	DEL	ENSBTAG00000009314	C1orf168	chromosome 1 open reading frame 168 [Source:HGNC Symbol;Acc:HGNC:27295]	No_Paralogs	protein_coding	Entire gene
CNVR_3633	13	10812199	11297453	485255	CNV	ENSBTAG00000004354			Paralogs	protein_coding	Entire gene
CNVR_3633	13	10812199	11297453	485255	CNV	ENSBTAG00000023169			Paralogs	protein_coding	Entire gene
CNVR_3635	13	10960139	17846162	6886024	DEL	ENSBTAG00000022931			Paralogs	protein_coding	Some exons
CNVR_3635	13	10960139	17846162	6886024	DEL	ENSBTAG00000023169			Paralogs	protein_coding	3' UTR
CNVR_11971	28	2275709	4192646	1916938	DEL	ENSBTAG00000023074	C1orf198	chromosome 1 open reading frame 198 [Source:HGNC Symbol;Acc:HGNC:25900]	No_Paralogs	protein_coding	Entire gene
CNVR_3635	13	10960139	17846162	6886024	DEL	ENSBTAG00000000291	DHTKD1	dehydrogenase E1 and transketolase domain containing 1 [Source:HGNC Symbol;Acc:HGNC:23537]	Paralogs	protein_coding	Entire gene
CNVR_7619	2	5706778	7047584	1340807	DEL	ENSBTAG00000026994	C2orf88	chromosome 2 open reading frame 88 [Source:HGNC Symbol;Acc:HGNC:28191]	No_Paralogs	protein_coding	Entire gene
CNVR_11676	27	10742343	15979016	5236674	DEL	ENSBTAG00000034430	C4orf47	chromosome 4 open reading frame 47 [Source:HGNC Symbol;Acc:HGNC:34346]	No_Paralogs	protein_coding	Entire gene
CNVR_3635	13	10960139	17846162	6886024	DEL	ENSBTAG00000004354			Paralogs	protein_coding	Entire gene
CNVR_3635	13	10960139	17846162	6886024	DEL	ENSBTAG00000005915	SFMBT2	Scm-like with four mbt domains 2 [Source:HGNC Symbol;Acc:HGNC:20256]	Paralogs	protein_coding	Entire gene
CNVR_10203	23	27688326	27879750	191425	DEL	ENSBTAG00000004539	C6orf15	chromosome 6 open reading frame 15 [Source:HGNC Symbol;Acc:HGNC:13927]	No_Paralogs	protein_coding	Entire gene
CNVR_3635	13	10960139	17846162	6886024	DEL	ENSBTAG00000008401	PFKFB3	6-phosphofructo-2-kinase/fructose-2,6-biphosphatase 3 [Source:HGNC Symbol;Acc:HGNC:8874]	Paralogs	protein_coding	Entire gene
CNVR_3635	13	10960139	17846162	6886024	DEL	ENSBTAG00000008650	CAMK1D	calcium/calmodulin dependent protein kinase ID [Source:HGNC Symbol;Acc:HGNC:19341]	Paralogs	protein_coding	Entire gene
CNVR_3635	13	10960139	17846162	6886024	DEL	ENSBTAG00000008937	CELF2	CUGBP Elav-like family member 2 [Source:HGNC Symbol;Acc:HGNC:2550]	Paralogs	protein_coding	Entire gene
CNVR_3635	13	10960139	17846162	6886024	DEL	ENSBTAG00000010664	PRKCQ	protein kinase C theta [Source:HGNC Symbol;Acc:HGNC:9410]	Paralogs	protein_coding	Entire gene
CNVR_3635	13	10960139	17846162	6886024	DEL	ENSBTAG00000012377	ECHDC3	enoyl-CoA hydratase domain containing 3 [Source:HGNC Symbol;Acc:HGNC:23489]	Paralogs	protein_coding	Entire gene
CNVR_3635	13	10960139	17846162	6886024	DEL	ENSBTAG00000013004	ITIH5	inter-alpha-trypsin inhibitor heavy chain family member 5 [Source:HGNC Symbol;Acc:HGNC:21449]	Paralogs	protein_coding	Entire gene
CNVR_2636	11	100036831	100037532	702	DEL	ENSBTAG00000019513	C9orf50	chromosome 9 open reading frame 50 [Source:HGNC Symbol;Acc:HGNC:23677]	No_Paralogs	protein_coding	Some exons
CNVR_11676	27	10742343	15979016	5236674	DEL	ENSBTAG00000017157	CCDC110	coiled-coil domain containing 110 [Source:HGNC Symbol;Acc:HGNC:28504]	No_Paralogs	protein_coding	Entire gene
CNVR_3635	13	10960139	17846162	6886024	DEL	ENSBTAG00000014075	ITIH2	inter-alpha-trypsin inhibitor heavy chain 2 [Source:HGNC Symbol;Acc:HGNC:6167]	Paralogs	protein_coding	Entire gene
CNVR_3635	13	10960139	17846162	6886024	DEL	ENSBTAG00000017012			Paralogs	protein_coding	Entire gene
CNVR_3635	13	10960139	17846162	6886024	DEL	ENSBTAG00000017243	GATA3	GATA binding protein 3 [Source:HGNC Symbol;Acc:HGNC:4172]	Paralogs	protein_coding	Entire gene
CNVR_3635	13	10960139	17846162	6886024	DEL	ENSBTAG00000019488	USP6NL	USP6 N-terminal like [Source:HGNC Symbol;Acc:HGNC:16858]	Paralogs	protein_coding	Entire gene
CNVR_3635	13	10960139	17846162	6886024	DEL	ENSBTAG00000019508	SEC61A2	Sec61 translocon alpha 2 subunit [Source:HGNC Symbol;Acc:HGNC:17702]	Paralogs	protein_coding	Entire gene
CNVR_12945	3	5779846	7464429	1684584	DEL	ENSBTAG00000027425	CCDC190	coiled-coil domain containing 190 [Source:HGNC Symbol;Acc:HGNC:28736]	No_Paralogs	protein_coding	Entire gene
CNVR_14799	5	11972840	11975814	2975	DEL	ENSBTAG00000036282	CCDC59	coiled-coil domain containing 59 [Source:HGNC Symbol;Acc:HGNC:25005]	No_Paralogs	protein_coding	Some exons
CNVR_10203	23	27688326	27879750	191425	DEL	ENSBTAG00000014434	CCHCR1	coiled-coil alpha-helical rod protein 1 [Source:HGNC Symbol;Acc:HGNC:13930]	No_Paralogs	protein_coding	Entire gene
CNVR_8393	2	118596001	118598148	2148	DEL	ENSBTAG00000039046	CD24		No_Paralogs	protein_coding	Entire gene
CNVR_3635	13	10960139	17846162	6886024	DEL	ENSBTAG00000022922			Paralogs	protein_coding	Entire gene
CNVR_3635	13	10960139	17846162	6886024	DEL	ENSBTAG00000036222			Paralogs	protein_coding	Entire gene
CNVR_3635	13	10960139	17846162	6886024	DEL	ENSBTAG00000037516			No_Paralogs	pseudogene	Entire gene
CNVR_3635	13	10960139	17846162	6886024	DEL	ENSBTAG00000019511	CDC123	cell division cycle 123 [Source:HGNC Symbol;Acc:HGNC:16827]	No_Paralogs	protein_coding	Entire gene
CNVR_3635	13	10960139	17846162	6886024	DEL	ENSBTAG00000040046			Paralogs	protein_coding	Entire gene
CNVR_3635	13	10960139	17846162	6886024	DEL	ENSBTAG00000040490			Paralogs	protein_coding	Entire gene
CNVR_3635	13	10960139	17846162	6886024	DEL	ENSBTAG00000042724	U6	U6 spliceosomal RNA [Source:RFAM;Acc:RF00026]	Paralogs	snRNA	Entire gene
CNVR_3635	13	10960139	17846162	6886024	DEL	ENSBTAG00000044851	U3	Small nucleolar RNA U3 [Source:RFAM;Acc:RF00012]	Paralogs	snoRNA	Entire gene
CNVR_3635	13	10960139	17846162	6886024	DEL	ENSBTAG00000044988	U6	U6 spliceosomal RNA [Source:RFAM;Acc:RF00026]	Paralogs	snRNA	Entire gene
CNVR_3635	13	10960139	17846162	6886024	DEL	ENSBTAG00000045036	U6	U6 spliceosomal RNA [Source:RFAM;Acc:RF00026]	Paralogs	snRNA	Entire gene
CNVR_3635	13	10960139	17846162	6886024	DEL	ENSBTAG00000045070	U6atac	U6atac minor spliceosomal RNA [Source:RFAM;Acc:RF00619]	Paralogs	snRNA	Entire gene
CNVR_3635	13	10960139	17846162	6886024	DEL	ENSBTAG00000045874			No_Paralogs	miRNA	Entire gene
CNVR_3635	13	10960139	17846162	6886024	DEL	ENSBTAG00000048047			Paralogs	protein_coding	Entire gene
CNVR_3699	13	20741234	20874282	133049	DEL	ENSBTAG00000047430			No_Paralogs	miRNA	Entire gene
CNVR_3704	13	21305685	21306398	714	DEL	ENSBTAG00000023216	MALRD1		Paralogs	protein_coding	Intron
CNVR_3712	13	22813635	22814393	759	DEL	ENSBTAG00000003937		ribosomal protein S13 [Source:HGNC Symbol;Acc:HGNC:10386]	Paralogs	protein_coding	Entire gene
CNVR_3716	13	25455751	25459558	3808	DEL	ENSBTAG00000018395	KIAA1217	KIAA1217 [Source:HGNC Symbol;Acc:HGNC:25428]	Paralogs	protein_coding	Intron
CNVR_3723	13	26096016	26097074	1059	DEL	ENSBTAG00000015569	ENKUR	enkurin, TRPC channel interacting protein [Source:HGNC Symbol;Acc:HGNC:28388]	No_Paralogs	protein_coding	Intron
CNVR_3727	13	26399257	26400431	1175	DEL	ENSBTAG00000023920	GPR158	Probable G-protein coupled receptor 158 [Source:UniProtKB/Swiss-Prot;Acc:E1BBQ2]	Paralogs	protein_coding	Intron
CNVR_3742	13	28679751	28682500	2750	DEL	ENSBTAG00000008279	FRMD4A	FERM domain containing 4A [Source:HGNC Symbol;Acc:HGNC:25491]	Paralogs	protein_coding	Intron
CNVR_3743	13	28830918	28831801	884	DEL	ENSBTAG00000008279	FRMD4A	FERM domain containing 4A [Source:HGNC Symbol;Acc:HGNC:25491]	Paralogs	protein_coding	Intron
CNVR_3756	13	31587486	31589853	2368	DEL	ENSBTAG00000005072	CUBN	cubilin [Source:HGNC Symbol;Acc:HGNC:2548]	Paralogs	protein_coding	Intron
CNVR_3767	13	34141349	34209233	67885	DEL	ENSBTAG00000020053	ZEB1	zinc finger E-box-binding homeobox 1 [Source:RefSeq peptide;Acc:NP_001193519]	Paralogs	protein_coding	Intron
CNVR_3781	13	36647302	36650973	3672	DEL	ENSBTAG00000017354	MPP7	membrane palmitoylated protein 7 [Source:HGNC Symbol;Acc:HGNC:26542]	Paralogs	protein_coding	Intron
CNVR_3783	13	36949001	36954000	5000	DEL	ENSBTAG00000000654	ARMC4	armadillo repeat containing 4 [Source:HGNC Symbol;Acc:HGNC:25583]	Paralogs	protein_coding	Intron
CNVR_3785	13	37192924	37193788	865	DEL	ENSBTAG00000007678	MKX	mohawk homeobox [Source:HGNC Symbol;Acc:HGNC:23729]	Paralogs	protein_coding	Intron
CNVR_3793	13	38977710	38979006	1297	DEL	ENSBTAG00000008964	DTD1	D-tyrosyl-tRNA deacylase 1 [Source:HGNC Symbol;Acc:HGNC:16219]	No_Paralogs	protein_coding	Intron
CNVR_3795	13	39263397	39307465	44069	DEL	ENSBTAG00000011882	SLC24A3	solute carrier family 24 member 3 [Source:HGNC Symbol;Acc:HGNC:10977]	Paralogs	protein_coding	Some exons
CNVR_3798	13	39470251	39473000	2750	DEL	ENSBTAG00000011882	SLC24A3	solute carrier family 24 member 3 [Source:HGNC Symbol;Acc:HGNC:10977]	Paralogs	protein_coding	Intron
CNVR_3800	13	40165251	40212750	47500	DEL	ENSBTAG00000009291	CFAP61	cilia and flagella associated protein 61 [Source:HGNC Symbol;Acc:HGNC:15872]	No_Paralogs	protein_coding	Intron
CNVR_3824	13	43742415	46499958	2757544	DEL	ENSBTAG00000014194	ADARB2	adenosine deaminase, RNA specific B2	Paralogs	protein_coding	Some exons
CNVR_3824	13	43742415	46499958	2757544	DEL	ENSBTAG00000039356			Paralogs	protein_coding	Some exons
CNVR_3824	13	43742415	46499958	2757544	DEL	ENSBTAG00000002683	PFKP	phosphofructokinase, platelet [Source:HGNC Symbol;Acc:HGNC:8878]	Paralogs	protein_coding	Entire gene
CNVR_10203	23	27688326	27879750	191425	DEL	ENSBTAG00000021721	CDSN	corneodesmosin [Source:HGNC Symbol;Acc:HGNC:1802]	No_Paralogs	protein_coding	Entire gene
CNVR_3824	13	43742415	46499958	2757544	DEL	ENSBTAG00000015188	KLF6	Kruppel like factor 6 [Source:HGNC Symbol;Acc:HGNC:2235]	Paralogs	protein_coding	Entire gene
CNVR_3824	13	43742415	46499958	2757544	DEL	ENSBTAG00000017191			Paralogs	protein_coding	Entire gene
CNVR_3824	13	43742415	46499958	2757544	DEL	ENSBTAG00000017938			Paralogs	protein_coding	Entire gene
CNVR_3824	13	43742415	46499958	2757544	DEL	ENSBTAG00000021368			Paralogs	protein_coding	Entire gene
CNVR_3824	13	43742415	46499958	2757544	DEL	ENSBTAG00000022564		Dihydrodiol dehydrogenase 3 [Source:UniProtKB/Swiss-Prot;Acc:P52898]	Paralogs	protein_coding	Entire gene
CNVR_3824	13	43742415	46499958	2757544	DEL	ENSBTAG00000022570		Prostaglandin F synthase 2 [Source:UniProtKB/Swiss-Prot;Acc:P52897]	Paralogs	protein_coding	Entire gene
CNVR_3824	13	43742415	46499958	2757544	DEL	ENSBTAG00000022571			Paralogs	protein_coding	Entire gene
CNVR_3824	13	43742415	46499958	2757544	DEL	ENSBTAG00000027419			Paralogs	protein_coding	Entire gene
CNVR_3824	13	43742415	46499958	2757544	DEL	ENSBTAG00000037453			Paralogs	protein_coding	Entire gene
CNVR_3824	13	43742415	46499958	2757544	DEL	ENSBTAG00000038260	AKR1E2	aldo-keto reductase family 1 member E2 [Source:HGNC Symbol;Acc:HGNC:23437]	Paralogs	protein_coding	Entire gene
CNVR_3824	13	43742415	46499958	2757544	DEL	ENSBTAG00000039289			Paralogs	protein_coding	Entire gene
CNVR_3824	13	43742415	46499958	2757544	DEL	ENSBTAG00000039643			Paralogs	protein_coding	Entire gene
CNVR_3824	13	43742415	46499958	2757544	DEL	ENSBTAG00000039722			Paralogs	protein_coding	Entire gene
CNVR_3824	13	43742415	46499958	2757544	DEL	ENSBTAG00000044982	SNORA25	Small nucleolar RNA SNORA25 [Source:RFAM;Acc:RF00402]	Paralogs	snoRNA	Entire gene
CNVR_3824	13	43742415	46499958	2757544	DEL	ENSBTAG00000046128			No_Paralogs	miRNA	Entire gene
CNVR_3865	13	50345501	50407500	62000	DEL	ENSBTAG00000045555			Paralogs	protein_coding	Entire gene
CNVR_3865	13	50345501	50407500	62000	DEL	ENSBTAG00000045753			Paralogs	protein_coding	Entire gene
CNVR_3865	13	50345501	50407500	62000	DEL	ENSBTAG00000046276			Paralogs	protein_coding	Entire gene
CNVR_3865	13	50345501	50407500	62000	DEL	ENSBTAG00000046631			Paralogs	protein_coding	Entire gene
CNVR_3865	13	50345501	50407500	62000	DEL	ENSBTAG00000046716			Paralogs	protein_coding	Entire gene
CNVR_3865	13	50345501	50407500	62000	DEL	ENSBTAG00000046776			Paralogs	protein_coding	Entire gene
CNVR_3865	13	50345501	50407500	62000	DEL	ENSBTAG00000047102			Paralogs	protein_coding	Entire gene
CNVR_3865	13	50345501	50407500	62000	DEL	ENSBTAG00000047320			Paralogs	protein_coding	Entire gene
CNVR_3865	13	50345501	50407500	62000	DEL	ENSBTAG00000047638			Paralogs	protein_coding	Entire gene
CNVR_3865	13	50345501	50407500	62000	DEL	ENSBTAG00000047653			Paralogs	protein_coding	Entire gene
CNVR_3865	13	50345501	50407500	62000	DEL	ENSBTAG00000047962			Paralogs	protein_coding	Entire gene
CNVR_3865	13	50345501	50407500	62000	DEL	ENSBTAG00000048089			Paralogs	protein_coding	Entire gene
CNVR_3865	13	50345501	50407500	62000	DEL	ENSBTAG00000048291			Paralogs	protein_coding	Entire gene
CNVR_3866	13	50359932	50391802	31871	DEL	ENSBTAG00000045555			Paralogs	protein_coding	Some exons
CNVR_3866	13	50359932	50391802	31871	DEL	ENSBTAG00000046276			Paralogs	protein_coding	Some exons
CNVR_3866	13	50359932	50391802	31871	DEL	ENSBTAG00000046631			Paralogs	protein_coding	Some exons
CNVR_3866	13	50359932	50391802	31871	DEL	ENSBTAG00000047320			Paralogs	protein_coding	Some exons
CNVR_3866	13	50359932	50391802	31871	DEL	ENSBTAG00000046716			Paralogs	protein_coding	Entire gene
CNVR_3866	13	50359932	50391802	31871	DEL	ENSBTAG00000046776			Paralogs	protein_coding	Entire gene
CNVR_3866	13	50359932	50391802	31871	DEL	ENSBTAG00000047102			Paralogs	protein_coding	Entire gene
CNVR_3866	13	50359932	50391802	31871	DEL	ENSBTAG00000047638			Paralogs	protein_coding	Entire gene
CNVR_3866	13	50359932	50391802	31871	DEL	ENSBTAG00000047653			Paralogs	protein_coding	Entire gene
CNVR_3866	13	50359932	50391802	31871	DEL	ENSBTAG00000047962			Paralogs	protein_coding	Entire gene
CNVR_3866	13	50359932	50391802	31871	DEL	ENSBTAG00000048089			Paralogs	protein_coding	Entire gene
CNVR_3875	13	52172490	52173898	1409	DEL	ENSBTAG00000003848	ATRN	attractin [Source:HGNC Symbol;Acc:HGNC:885]	Paralogs	protein_coding	Intron
CNVR_3886	13	55415889	55417197	1309	DEL	ENSBTAG00000003061	LAMA5	laminin subunit alpha 5 [Source:HGNC Symbol;Acc:HGNC:6485]	Paralogs	protein_coding	Some exons
CNVR_3902	13	60148951	60402689	253739	DEL	ENSBTAG00000004712	MC3R	melanocortin 3 receptor [Source:HGNC Symbol;Acc:HGNC:6931]	Paralogs	protein_coding	Entire gene
CNVR_3902	13	60148951	60402689	253739	DEL	ENSBTAG00000006533	NSFL1C	NSFL1 cofactor [Source:HGNC Symbol;Acc:HGNC:15912]	Paralogs	protein_coding	Entire gene
CNVR_3902	13	60148951	60402689	253739	DEL	ENSBTAG00000006539			Paralogs	protein_coding	Entire gene
CNVR_3902	13	60148951	60402689	253739	DEL	ENSBTAG00000008303		Peptidyl-prolyl cis-trans isomerase FKBP1A [Source:UniProtKB/Swiss-Prot;Acc:P18203]	Paralogs	protein_coding	Entire gene
CNVR_3902	13	60148951	60402689	253739	DEL	ENSBTAG00000021321	SDCBP2	syndecan binding protein 2 [Source:HGNC Symbol;Acc:HGNC:15756]	Paralogs	protein_coding	Entire gene
CNVR_3902	13	60148951	60402689	253739	DEL	ENSBTAG00000031278	SNPH	syntaphilin [Source:HGNC Symbol;Acc:HGNC:15931]	Paralogs	protein_coding	Entire gene
CNVR_3902	13	60148951	60402689	253739	DEL	ENSBTAG00000033397			Paralogs	protein_coding	Entire gene
CNVR_3905	13	60515842	60517200	1359	DEL	ENSBTAG00000018417	PSMF1	proteasome inhibitor subunit 1 [Source:HGNC Symbol;Acc:HGNC:9571]	No_Paralogs	protein_coding	Intron
CNVR_3914	13	62912591	62913732	1142	DEL	ENSBTAG00000038687	BPIFB3	BPI fold-containing family B member 3 precursor [Source:RefSeq peptide;Acc:NP_001231194]	Paralogs	protein_coding	Intron
CNVR_3922	13	63324751	63326750	2000	DEL	ENSBTAG00000031361			No_Paralogs	protein_coding	Some exons
CNVR_3939	13	64377001	64383250	6250	DEL	ENSBTAG00000000308	ITCH	itchy E3 ubiquitin protein ligase [Source:HGNC Symbol;Acc:HGNC:13890]	Paralogs	protein_coding	Intron
CNVR_3944	13	65665263	65665933	671	DEL	ENSBTAG00000005571	PHF20	PHD finger protein 20 [Source:HGNC Symbol;Acc:HGNC:16098]	Paralogs	protein_coding	Intron
CNVR_3954	13	68352190	68353000	811	DEL	ENSBTAG00000000653	PPP1R16B	protein phosphatase 1 regulatory subunit 16B [Source:HGNC Symbol;Acc:HGNC:15850]	Paralogs	protein_coding	Intron
CNVR_3989	13	74495751	74499000	3250	DEL	ENSBTAG00000037942			Paralogs	protein_coding	Entire gene
CNVR_4014	13	79533001	79534750	1750	DEL	ENSBTAG00000038929	BCAS4	breast carcinoma amplified sequence 4 [Source:HGNC Symbol;Acc:HGNC:14367]	Paralogs	protein_coding	Intron
CNVR_4016	13	80195177	80196546	1370	DEL	ENSBTAG00000007962	ATP9A	ATPase phospholipid transporting 9A	Paralogs	protein_coding	Intron
CNVR_4017	13	80212513	80213329	817	DEL	ENSBTAG00000007962	ATP9A	ATPase phospholipid transporting 9A	Paralogs	protein_coding	Intron
CNVR_4054	14	2350	480132	477783	CNV	ENSBTAG00000034261			Paralogs	protein_coding	Entire gene
CNVR_4054	14	2350	480132	477783	CNV	ENSBTAG00000036045	5S_rRNA	5S ribosomal RNA [Source:RFAM;Acc:RF00001]	Paralogs	rRNA	Entire gene
CNVR_4054	14	2350	480132	477783	CNV	ENSBTAG00000044546	5S_rRNA	5S ribosomal RNA [Source:RFAM;Acc:RF00001]	Paralogs	rRNA	Entire gene
CNVR_4054	14	2350	480132	477783	CNV	ENSBTAG00000045780	5S_rRNA	5S ribosomal RNA [Source:RFAM;Acc:RF00001]	Paralogs	rRNA	Entire gene
CNVR_4054	14	2350	480132	477783	CNV	ENSBTAG00000045988	5S_rRNA	5S ribosomal RNA [Source:RFAM;Acc:RF00001]	Paralogs	rRNA	Entire gene
CNVR_4054	14	2350	480132	477783	CNV	ENSBTAG00000046592	U6	U6 spliceosomal RNA [Source:RFAM;Acc:RF00026]	Paralogs	snRNA	Entire gene
CNVR_4054	14	2350	480132	477783	CNV	ENSBTAG00000046719	5S_rRNA	5S ribosomal RNA [Source:RFAM;Acc:RF00001]	Paralogs	rRNA	Entire gene
CNVR_4054	14	2350	480132	477783	CNV	ENSBTAG00000046736	5S_rRNA	5S ribosomal RNA [Source:RFAM;Acc:RF00001]	Paralogs	rRNA	Entire gene
CNVR_4054	14	2350	480132	477783	CNV	ENSBTAG00000046737	5S_rRNA	5S ribosomal RNA [Source:RFAM;Acc:RF00001]	Paralogs	rRNA	Entire gene
CNVR_4054	14	2350	480132	477783	CNV	ENSBTAG00000046822	U6	U6 spliceosomal RNA [Source:RFAM;Acc:RF00026]	Paralogs	snRNA	Entire gene
CNVR_4054	14	2350	480132	477783	CNV	ENSBTAG00000046827	5S_rRNA	5S ribosomal RNA [Source:RFAM;Acc:RF00001]	Paralogs	rRNA	Entire gene
CNVR_4054	14	2350	480132	477783	CNV	ENSBTAG00000046868			No_Paralogs	pseudogene	Entire gene
CNVR_4054	14	2350	480132	477783	CNV	ENSBTAG00000047283	5S_rRNA	5S ribosomal RNA [Source:RFAM;Acc:RF00001]	Paralogs	rRNA	Entire gene
CNVR_4054	14	2350	480132	477783	CNV	ENSBTAG00000047792	5S_rRNA	5S ribosomal RNA [Source:RFAM;Acc:RF00001]	Paralogs	rRNA	Entire gene
CNVR_4054	14	2350	480132	477783	CNV	ENSBTAG00000047897	5S_rRNA	5S ribosomal RNA [Source:RFAM;Acc:RF00001]	Paralogs	rRNA	Entire gene
CNVR_4054	14	2350	480132	477783	CNV	ENSBTAG00000048266	5S_rRNA	5S ribosomal RNA [Source:RFAM;Acc:RF00001]	Paralogs	rRNA	Entire gene
CNVR_4055	14	19133	302441	283309	DEL	ENSBTAG00000036045	5S_rRNA	5S ribosomal RNA [Source:RFAM;Acc:RF00001]	Paralogs	rRNA	Entire gene
CNVR_4055	14	19133	302441	283309	DEL	ENSBTAG00000046736	5S_rRNA	5S ribosomal RNA [Source:RFAM;Acc:RF00001]	Paralogs	rRNA	Entire gene
CNVR_4055	14	19133	302441	283309	DEL	ENSBTAG00000046737	5S_rRNA	5S ribosomal RNA [Source:RFAM;Acc:RF00001]	Paralogs	rRNA	Entire gene
CNVR_4055	14	19133	302441	283309	DEL	ENSBTAG00000046822	U6	U6 spliceosomal RNA [Source:RFAM;Acc:RF00026]	Paralogs	snRNA	Entire gene
CNVR_4055	14	19133	302441	283309	DEL	ENSBTAG00000046827	5S_rRNA	5S ribosomal RNA [Source:RFAM;Acc:RF00001]	Paralogs	rRNA	Entire gene
CNVR_4055	14	19133	302441	283309	DEL	ENSBTAG00000046868			No_Paralogs	pseudogene	Entire gene
CNVR_4055	14	19133	302441	283309	DEL	ENSBTAG00000048266	5S_rRNA	5S ribosomal RNA [Source:RFAM;Acc:RF00001]	Paralogs	rRNA	Entire gene
CNVR_4058	14	22954	1365304	1342351	CNV	ENSBTAG00000003273			No_Paralogs	pseudogene	Entire gene
CNVR_4058	14	22954	1365304	1342351	CNV	ENSBTAG00000006597			No_Paralogs	pseudogene	Entire gene
CNVR_4058	14	22954	1365304	1342351	CNV	ENSBTAG00000034176			Paralogs	protein_coding	Entire gene
CNVR_4058	14	22954	1365304	1342351	CNV	ENSBTAG00000034261			Paralogs	protein_coding	Entire gene
CNVR_4058	14	22954	1365304	1342351	CNV	ENSBTAG00000036045	5S_rRNA	5S ribosomal RNA [Source:RFAM;Acc:RF00001]	Paralogs	rRNA	Entire gene
CNVR_4058	14	22954	1365304	1342351	CNV	ENSBTAG00000036098			Paralogs	protein_coding	Entire gene
CNVR_4058	14	22954	1365304	1342351	CNV	ENSBTAG00000042158	U6	U6 spliceosomal RNA [Source:RFAM;Acc:RF00026]	Paralogs	snRNA	Entire gene
CNVR_4058	14	22954	1365304	1342351	CNV	ENSBTAG00000044546	5S_rRNA	5S ribosomal RNA [Source:RFAM;Acc:RF00001]	Paralogs	rRNA	Entire gene
CNVR_4058	14	22954	1365304	1342351	CNV	ENSBTAG00000045524	5S_rRNA	5S ribosomal RNA [Source:RFAM;Acc:RF00001]	Paralogs	rRNA	Entire gene
CNVR_4058	14	22954	1365304	1342351	CNV	ENSBTAG00000045557	5S_rRNA	5S ribosomal RNA [Source:RFAM;Acc:RF00001]	Paralogs	rRNA	Entire gene
CNVR_4058	14	22954	1365304	1342351	CNV	ENSBTAG00000045579			Paralogs	protein_coding	Entire gene
CNVR_4058	14	22954	1365304	1342351	CNV	ENSBTAG00000045654			No_Paralogs	pseudogene	Entire gene
CNVR_4058	14	22954	1365304	1342351	CNV	ENSBTAG00000045707	5S_rRNA	5S ribosomal RNA [Source:RFAM;Acc:RF00001]	Paralogs	rRNA	Entire gene
CNVR_4058	14	22954	1365304	1342351	CNV	ENSBTAG00000045763			No_Paralogs	pseudogene	Entire gene
CNVR_4058	14	22954	1365304	1342351	CNV	ENSBTAG00000045780	5S_rRNA	5S ribosomal RNA [Source:RFAM;Acc:RF00001]	Paralogs	rRNA	Entire gene
CNVR_4058	14	22954	1365304	1342351	CNV	ENSBTAG00000045815	5S_rRNA	5S ribosomal RNA [Source:RFAM;Acc:RF00001]	Paralogs	rRNA	Entire gene
CNVR_4058	14	22954	1365304	1342351	CNV	ENSBTAG00000045988	5S_rRNA	5S ribosomal RNA [Source:RFAM;Acc:RF00001]	Paralogs	rRNA	Entire gene
CNVR_4058	14	22954	1365304	1342351	CNV	ENSBTAG00000046241	5S_rRNA	5S ribosomal RNA [Source:RFAM;Acc:RF00001]	Paralogs	rRNA	Entire gene
CNVR_4058	14	22954	1365304	1342351	CNV	ENSBTAG00000046435			Paralogs	protein_coding	Entire gene
CNVR_4058	14	22954	1365304	1342351	CNV	ENSBTAG00000046592	U6	U6 spliceosomal RNA [Source:RFAM;Acc:RF00026]	Paralogs	snRNA	Entire gene
CNVR_4058	14	22954	1365304	1342351	CNV	ENSBTAG00000046719	5S_rRNA	5S ribosomal RNA [Source:RFAM;Acc:RF00001]	Paralogs	rRNA	Entire gene
CNVR_4058	14	22954	1365304	1342351	CNV	ENSBTAG00000046736	5S_rRNA	5S ribosomal RNA [Source:RFAM;Acc:RF00001]	Paralogs	rRNA	Entire gene
CNVR_4058	14	22954	1365304	1342351	CNV	ENSBTAG00000046737	5S_rRNA	5S ribosomal RNA [Source:RFAM;Acc:RF00001]	Paralogs	rRNA	Entire gene
CNVR_4058	14	22954	1365304	1342351	CNV	ENSBTAG00000046822	U6	U6 spliceosomal RNA [Source:RFAM;Acc:RF00026]	Paralogs	snRNA	Entire gene
CNVR_4058	14	22954	1365304	1342351	CNV	ENSBTAG00000046827	5S_rRNA	5S ribosomal RNA [Source:RFAM;Acc:RF00001]	Paralogs	rRNA	Entire gene
CNVR_4058	14	22954	1365304	1342351	CNV	ENSBTAG00000046868			No_Paralogs	pseudogene	Entire gene
CNVR_4058	14	22954	1365304	1342351	CNV	ENSBTAG00000046932			Paralogs	protein_coding	Entire gene
CNVR_4058	14	22954	1365304	1342351	CNV	ENSBTAG00000047065	5S_rRNA	5S ribosomal RNA [Source:RFAM;Acc:RF00001]	Paralogs	rRNA	Entire gene
CNVR_4058	14	22954	1365304	1342351	CNV	ENSBTAG00000047283	5S_rRNA	5S ribosomal RNA [Source:RFAM;Acc:RF00001]	Paralogs	rRNA	Entire gene
CNVR_4058	14	22954	1365304	1342351	CNV	ENSBTAG00000047387	5S_rRNA	5S ribosomal RNA [Source:RFAM;Acc:RF00001]	Paralogs	rRNA	Entire gene
CNVR_4058	14	22954	1365304	1342351	CNV	ENSBTAG00000047447	5S_rRNA	5S ribosomal RNA [Source:RFAM;Acc:RF00001]	Paralogs	rRNA	Entire gene
CNVR_4058	14	22954	1365304	1342351	CNV	ENSBTAG00000047553	5S_rRNA	5S ribosomal RNA [Source:RFAM;Acc:RF00001]	Paralogs	rRNA	Entire gene
CNVR_4058	14	22954	1365304	1342351	CNV	ENSBTAG00000047792	5S_rRNA	5S ribosomal RNA [Source:RFAM;Acc:RF00001]	Paralogs	rRNA	Entire gene
CNVR_4058	14	22954	1365304	1342351	CNV	ENSBTAG00000047800	5S_rRNA	5S ribosomal RNA [Source:RFAM;Acc:RF00001]	Paralogs	rRNA	Entire gene
CNVR_4058	14	22954	1365304	1342351	CNV	ENSBTAG00000047897	5S_rRNA	5S ribosomal RNA [Source:RFAM;Acc:RF00001]	Paralogs	rRNA	Entire gene
CNVR_4058	14	22954	1365304	1342351	CNV	ENSBTAG00000048001			Paralogs	protein_coding	Entire gene
CNVR_4058	14	22954	1365304	1342351	CNV	ENSBTAG00000048242	5S_rRNA	5S ribosomal RNA [Source:RFAM;Acc:RF00001]	Paralogs	rRNA	Entire gene
CNVR_4058	14	22954	1365304	1342351	CNV	ENSBTAG00000048266	5S_rRNA	5S ribosomal RNA [Source:RFAM;Acc:RF00001]	Paralogs	rRNA	Entire gene
CNVR_4059	14	36192	384798	348607	CNV	ENSBTAG00000034261			Paralogs	protein_coding	Entire gene
CNVR_4059	14	36192	384798	348607	CNV	ENSBTAG00000036045	5S_rRNA	5S ribosomal RNA [Source:RFAM;Acc:RF00001]	Paralogs	rRNA	Entire gene
CNVR_4059	14	36192	384798	348607	CNV	ENSBTAG00000045988	5S_rRNA	5S ribosomal RNA [Source:RFAM;Acc:RF00001]	Paralogs	rRNA	Entire gene
CNVR_4059	14	36192	384798	348607	CNV	ENSBTAG00000046736	5S_rRNA	5S ribosomal RNA [Source:RFAM;Acc:RF00001]	Paralogs	rRNA	Entire gene
CNVR_4059	14	36192	384798	348607	CNV	ENSBTAG00000046737	5S_rRNA	5S ribosomal RNA [Source:RFAM;Acc:RF00001]	Paralogs	rRNA	Entire gene
CNVR_4059	14	36192	384798	348607	CNV	ENSBTAG00000046822	U6	U6 spliceosomal RNA [Source:RFAM;Acc:RF00026]	Paralogs	snRNA	Entire gene
CNVR_4059	14	36192	384798	348607	CNV	ENSBTAG00000046827	5S_rRNA	5S ribosomal RNA [Source:RFAM;Acc:RF00001]	Paralogs	rRNA	Entire gene
CNVR_4059	14	36192	384798	348607	CNV	ENSBTAG00000046868			No_Paralogs	pseudogene	Entire gene
CNVR_4059	14	36192	384798	348607	CNV	ENSBTAG00000047283	5S_rRNA	5S ribosomal RNA [Source:RFAM;Acc:RF00001]	Paralogs	rRNA	Entire gene
CNVR_4059	14	36192	384798	348607	CNV	ENSBTAG00000047792	5S_rRNA	5S ribosomal RNA [Source:RFAM;Acc:RF00001]	Paralogs	rRNA	Entire gene
CNVR_4059	14	36192	384798	348607	CNV	ENSBTAG00000048266	5S_rRNA	5S ribosomal RNA [Source:RFAM;Acc:RF00001]	Paralogs	rRNA	Entire gene
CNVR_4061	14	58523	1003680	945158	CNV	ENSBTAG00000034176			Paralogs	protein_coding	Entire gene
CNVR_4061	14	58523	1003680	945158	CNV	ENSBTAG00000034261			Paralogs	protein_coding	Entire gene
CNVR_4061	14	58523	1003680	945158	CNV	ENSBTAG00000036045	5S_rRNA	5S ribosomal RNA [Source:RFAM;Acc:RF00001]	Paralogs	rRNA	Entire gene
CNVR_4061	14	58523	1003680	945158	CNV	ENSBTAG00000042158	U6	U6 spliceosomal RNA [Source:RFAM;Acc:RF00026]	Paralogs	snRNA	Entire gene
CNVR_4061	14	58523	1003680	945158	CNV	ENSBTAG00000044546	5S_rRNA	5S ribosomal RNA [Source:RFAM;Acc:RF00001]	Paralogs	rRNA	Entire gene
CNVR_4061	14	58523	1003680	945158	CNV	ENSBTAG00000045524	5S_rRNA	5S ribosomal RNA [Source:RFAM;Acc:RF00001]	Paralogs	rRNA	Entire gene
CNVR_4061	14	58523	1003680	945158	CNV	ENSBTAG00000045557	5S_rRNA	5S ribosomal RNA [Source:RFAM;Acc:RF00001]	Paralogs	rRNA	Entire gene
CNVR_4061	14	58523	1003680	945158	CNV	ENSBTAG00000045707	5S_rRNA	5S ribosomal RNA [Source:RFAM;Acc:RF00001]	Paralogs	rRNA	Entire gene
CNVR_4061	14	58523	1003680	945158	CNV	ENSBTAG00000045763			No_Paralogs	pseudogene	Entire gene
CNVR_4061	14	58523	1003680	945158	CNV	ENSBTAG00000045780	5S_rRNA	5S ribosomal RNA [Source:RFAM;Acc:RF00001]	Paralogs	rRNA	Entire gene
CNVR_4061	14	58523	1003680	945158	CNV	ENSBTAG00000045815	5S_rRNA	5S ribosomal RNA [Source:RFAM;Acc:RF00001]	Paralogs	rRNA	Entire gene
CNVR_4061	14	58523	1003680	945158	CNV	ENSBTAG00000045988	5S_rRNA	5S ribosomal RNA [Source:RFAM;Acc:RF00001]	Paralogs	rRNA	Entire gene
CNVR_4061	14	58523	1003680	945158	CNV	ENSBTAG00000046241	5S_rRNA	5S ribosomal RNA [Source:RFAM;Acc:RF00001]	Paralogs	rRNA	Entire gene
CNVR_4061	14	58523	1003680	945158	CNV	ENSBTAG00000046592	U6	U6 spliceosomal RNA [Source:RFAM;Acc:RF00026]	Paralogs	snRNA	Entire gene
CNVR_4061	14	58523	1003680	945158	CNV	ENSBTAG00000046719	5S_rRNA	5S ribosomal RNA [Source:RFAM;Acc:RF00001]	Paralogs	rRNA	Entire gene
CNVR_4061	14	58523	1003680	945158	CNV	ENSBTAG00000046736	5S_rRNA	5S ribosomal RNA [Source:RFAM;Acc:RF00001]	Paralogs	rRNA	Entire gene
CNVR_4061	14	58523	1003680	945158	CNV	ENSBTAG00000046737	5S_rRNA	5S ribosomal RNA [Source:RFAM;Acc:RF00001]	Paralogs	rRNA	Entire gene
CNVR_4061	14	58523	1003680	945158	CNV	ENSBTAG00000046822	U6	U6 spliceosomal RNA [Source:RFAM;Acc:RF00026]	Paralogs	snRNA	Entire gene
CNVR_4061	14	58523	1003680	945158	CNV	ENSBTAG00000046827	5S_rRNA	5S ribosomal RNA [Source:RFAM;Acc:RF00001]	Paralogs	rRNA	Entire gene
CNVR_4061	14	58523	1003680	945158	CNV	ENSBTAG00000046868			No_Paralogs	pseudogene	Entire gene
CNVR_4061	14	58523	1003680	945158	CNV	ENSBTAG00000047065	5S_rRNA	5S ribosomal RNA [Source:RFAM;Acc:RF00001]	Paralogs	rRNA	Entire gene
CNVR_4061	14	58523	1003680	945158	CNV	ENSBTAG00000047283	5S_rRNA	5S ribosomal RNA [Source:RFAM;Acc:RF00001]	Paralogs	rRNA	Entire gene
CNVR_4061	14	58523	1003680	945158	CNV	ENSBTAG00000047387	5S_rRNA	5S ribosomal RNA [Source:RFAM;Acc:RF00001]	Paralogs	rRNA	Entire gene
CNVR_4061	14	58523	1003680	945158	CNV	ENSBTAG00000047792	5S_rRNA	5S ribosomal RNA [Source:RFAM;Acc:RF00001]	Paralogs	rRNA	Entire gene
CNVR_4061	14	58523	1003680	945158	CNV	ENSBTAG00000047800	5S_rRNA	5S ribosomal RNA [Source:RFAM;Acc:RF00001]	Paralogs	rRNA	Entire gene
CNVR_4061	14	58523	1003680	945158	CNV	ENSBTAG00000047897	5S_rRNA	5S ribosomal RNA [Source:RFAM;Acc:RF00001]	Paralogs	rRNA	Entire gene
CNVR_4061	14	58523	1003680	945158	CNV	ENSBTAG00000048242	5S_rRNA	5S ribosomal RNA [Source:RFAM;Acc:RF00001]	Paralogs	rRNA	Entire gene
CNVR_4061	14	58523	1003680	945158	CNV	ENSBTAG00000048266	5S_rRNA	5S ribosomal RNA [Source:RFAM;Acc:RF00001]	Paralogs	rRNA	Entire gene
CNVR_4062	14	76592	1003680	927089	CNV	ENSBTAG00000034176			Paralogs	protein_coding	Entire gene
CNVR_4062	14	76592	1003680	927089	CNV	ENSBTAG00000034261			Paralogs	protein_coding	Entire gene
CNVR_4062	14	76592	1003680	927089	CNV	ENSBTAG00000036045	5S_rRNA	5S ribosomal RNA [Source:RFAM;Acc:RF00001]	Paralogs	rRNA	Entire gene
CNVR_4062	14	76592	1003680	927089	CNV	ENSBTAG00000042158	U6	U6 spliceosomal RNA [Source:RFAM;Acc:RF00026]	Paralogs	snRNA	Entire gene
CNVR_4062	14	76592	1003680	927089	CNV	ENSBTAG00000044546	5S_rRNA	5S ribosomal RNA [Source:RFAM;Acc:RF00001]	Paralogs	rRNA	Entire gene
CNVR_4062	14	76592	1003680	927089	CNV	ENSBTAG00000045524	5S_rRNA	5S ribosomal RNA [Source:RFAM;Acc:RF00001]	Paralogs	rRNA	Entire gene
CNVR_4062	14	76592	1003680	927089	CNV	ENSBTAG00000045557	5S_rRNA	5S ribosomal RNA [Source:RFAM;Acc:RF00001]	Paralogs	rRNA	Entire gene
CNVR_4062	14	76592	1003680	927089	CNV	ENSBTAG00000045707	5S_rRNA	5S ribosomal RNA [Source:RFAM;Acc:RF00001]	Paralogs	rRNA	Entire gene
CNVR_4062	14	76592	1003680	927089	CNV	ENSBTAG00000045763			No_Paralogs	pseudogene	Entire gene
CNVR_4062	14	76592	1003680	927089	CNV	ENSBTAG00000045780	5S_rRNA	5S ribosomal RNA [Source:RFAM;Acc:RF00001]	Paralogs	rRNA	Entire gene
CNVR_4062	14	76592	1003680	927089	CNV	ENSBTAG00000045815	5S_rRNA	5S ribosomal RNA [Source:RFAM;Acc:RF00001]	Paralogs	rRNA	Entire gene
CNVR_4062	14	76592	1003680	927089	CNV	ENSBTAG00000045988	5S_rRNA	5S ribosomal RNA [Source:RFAM;Acc:RF00001]	Paralogs	rRNA	Entire gene
CNVR_4062	14	76592	1003680	927089	CNV	ENSBTAG00000046241	5S_rRNA	5S ribosomal RNA [Source:RFAM;Acc:RF00001]	Paralogs	rRNA	Entire gene
CNVR_4062	14	76592	1003680	927089	CNV	ENSBTAG00000046592	U6	U6 spliceosomal RNA [Source:RFAM;Acc:RF00026]	Paralogs	snRNA	Entire gene
CNVR_4062	14	76592	1003680	927089	CNV	ENSBTAG00000046719	5S_rRNA	5S ribosomal RNA [Source:RFAM;Acc:RF00001]	Paralogs	rRNA	Entire gene
CNVR_4062	14	76592	1003680	927089	CNV	ENSBTAG00000046736	5S_rRNA	5S ribosomal RNA [Source:RFAM;Acc:RF00001]	Paralogs	rRNA	Entire gene
CNVR_4062	14	76592	1003680	927089	CNV	ENSBTAG00000046737	5S_rRNA	5S ribosomal RNA [Source:RFAM;Acc:RF00001]	Paralogs	rRNA	Entire gene
CNVR_4062	14	76592	1003680	927089	CNV	ENSBTAG00000046822	U6	U6 spliceosomal RNA [Source:RFAM;Acc:RF00026]	Paralogs	snRNA	Entire gene
CNVR_4062	14	76592	1003680	927089	CNV	ENSBTAG00000046827	5S_rRNA	5S ribosomal RNA [Source:RFAM;Acc:RF00001]	Paralogs	rRNA	Entire gene
CNVR_4062	14	76592	1003680	927089	CNV	ENSBTAG00000046868			No_Paralogs	pseudogene	Entire gene
CNVR_4062	14	76592	1003680	927089	CNV	ENSBTAG00000047065	5S_rRNA	5S ribosomal RNA [Source:RFAM;Acc:RF00001]	Paralogs	rRNA	Entire gene
CNVR_4062	14	76592	1003680	927089	CNV	ENSBTAG00000047283	5S_rRNA	5S ribosomal RNA [Source:RFAM;Acc:RF00001]	Paralogs	rRNA	Entire gene
CNVR_4062	14	76592	1003680	927089	CNV	ENSBTAG00000047387	5S_rRNA	5S ribosomal RNA [Source:RFAM;Acc:RF00001]	Paralogs	rRNA	Entire gene
CNVR_4062	14	76592	1003680	927089	CNV	ENSBTAG00000047792	5S_rRNA	5S ribosomal RNA [Source:RFAM;Acc:RF00001]	Paralogs	rRNA	Entire gene
CNVR_4062	14	76592	1003680	927089	CNV	ENSBTAG00000047800	5S_rRNA	5S ribosomal RNA [Source:RFAM;Acc:RF00001]	Paralogs	rRNA	Entire gene
CNVR_4062	14	76592	1003680	927089	CNV	ENSBTAG00000047897	5S_rRNA	5S ribosomal RNA [Source:RFAM;Acc:RF00001]	Paralogs	rRNA	Entire gene
CNVR_4062	14	76592	1003680	927089	CNV	ENSBTAG00000048242	5S_rRNA	5S ribosomal RNA [Source:RFAM;Acc:RF00001]	Paralogs	rRNA	Entire gene
CNVR_4062	14	76592	1003680	927089	CNV	ENSBTAG00000048266	5S_rRNA	5S ribosomal RNA [Source:RFAM;Acc:RF00001]	Paralogs	rRNA	Entire gene
CNVR_4070	14	111279	1003680	892402	CNV	ENSBTAG00000034176			Paralogs	protein_coding	Entire gene
CNVR_4070	14	111279	1003680	892402	CNV	ENSBTAG00000034261			Paralogs	protein_coding	Entire gene
CNVR_4070	14	111279	1003680	892402	CNV	ENSBTAG00000036045	5S_rRNA	5S ribosomal RNA [Source:RFAM;Acc:RF00001]	Paralogs	rRNA	Entire gene
CNVR_4070	14	111279	1003680	892402	CNV	ENSBTAG00000042158	U6	U6 spliceosomal RNA [Source:RFAM;Acc:RF00026]	Paralogs	snRNA	Entire gene
CNVR_4070	14	111279	1003680	892402	CNV	ENSBTAG00000044546	5S_rRNA	5S ribosomal RNA [Source:RFAM;Acc:RF00001]	Paralogs	rRNA	Entire gene
CNVR_4070	14	111279	1003680	892402	CNV	ENSBTAG00000045524	5S_rRNA	5S ribosomal RNA [Source:RFAM;Acc:RF00001]	Paralogs	rRNA	Entire gene
CNVR_4070	14	111279	1003680	892402	CNV	ENSBTAG00000045557	5S_rRNA	5S ribosomal RNA [Source:RFAM;Acc:RF00001]	Paralogs	rRNA	Entire gene
CNVR_4070	14	111279	1003680	892402	CNV	ENSBTAG00000045707	5S_rRNA	5S ribosomal RNA [Source:RFAM;Acc:RF00001]	Paralogs	rRNA	Entire gene
CNVR_4070	14	111279	1003680	892402	CNV	ENSBTAG00000045763			No_Paralogs	pseudogene	Entire gene
CNVR_4070	14	111279	1003680	892402	CNV	ENSBTAG00000045780	5S_rRNA	5S ribosomal RNA [Source:RFAM;Acc:RF00001]	Paralogs	rRNA	Entire gene
CNVR_4070	14	111279	1003680	892402	CNV	ENSBTAG00000045815	5S_rRNA	5S ribosomal RNA [Source:RFAM;Acc:RF00001]	Paralogs	rRNA	Entire gene
CNVR_4070	14	111279	1003680	892402	CNV	ENSBTAG00000045988	5S_rRNA	5S ribosomal RNA [Source:RFAM;Acc:RF00001]	Paralogs	rRNA	Entire gene
CNVR_4070	14	111279	1003680	892402	CNV	ENSBTAG00000046241	5S_rRNA	5S ribosomal RNA [Source:RFAM;Acc:RF00001]	Paralogs	rRNA	Entire gene
CNVR_4070	14	111279	1003680	892402	CNV	ENSBTAG00000046592	U6	U6 spliceosomal RNA [Source:RFAM;Acc:RF00026]	Paralogs	snRNA	Entire gene
CNVR_4070	14	111279	1003680	892402	CNV	ENSBTAG00000046719	5S_rRNA	5S ribosomal RNA [Source:RFAM;Acc:RF00001]	Paralogs	rRNA	Entire gene
CNVR_4070	14	111279	1003680	892402	CNV	ENSBTAG00000046736	5S_rRNA	5S ribosomal RNA [Source:RFAM;Acc:RF00001]	Paralogs	rRNA	Entire gene
CNVR_4070	14	111279	1003680	892402	CNV	ENSBTAG00000046737	5S_rRNA	5S ribosomal RNA [Source:RFAM;Acc:RF00001]	Paralogs	rRNA	Entire gene
CNVR_4070	14	111279	1003680	892402	CNV	ENSBTAG00000046822	U6	U6 spliceosomal RNA [Source:RFAM;Acc:RF00026]	Paralogs	snRNA	Entire gene
CNVR_4070	14	111279	1003680	892402	CNV	ENSBTAG00000046827	5S_rRNA	5S ribosomal RNA [Source:RFAM;Acc:RF00001]	Paralogs	rRNA	Entire gene
CNVR_4070	14	111279	1003680	892402	CNV	ENSBTAG00000046868			No_Paralogs	pseudogene	Entire gene
CNVR_4070	14	111279	1003680	892402	CNV	ENSBTAG00000047065	5S_rRNA	5S ribosomal RNA [Source:RFAM;Acc:RF00001]	Paralogs	rRNA	Entire gene
CNVR_4070	14	111279	1003680	892402	CNV	ENSBTAG00000047283	5S_rRNA	5S ribosomal RNA [Source:RFAM;Acc:RF00001]	Paralogs	rRNA	Entire gene
CNVR_4070	14	111279	1003680	892402	CNV	ENSBTAG00000047387	5S_rRNA	5S ribosomal RNA [Source:RFAM;Acc:RF00001]	Paralogs	rRNA	Entire gene
CNVR_4070	14	111279	1003680	892402	CNV	ENSBTAG00000047792	5S_rRNA	5S ribosomal RNA [Source:RFAM;Acc:RF00001]	Paralogs	rRNA	Entire gene
CNVR_4070	14	111279	1003680	892402	CNV	ENSBTAG00000047800	5S_rRNA	5S ribosomal RNA [Source:RFAM;Acc:RF00001]	Paralogs	rRNA	Entire gene
CNVR_4070	14	111279	1003680	892402	CNV	ENSBTAG00000047897	5S_rRNA	5S ribosomal RNA [Source:RFAM;Acc:RF00001]	Paralogs	rRNA	Entire gene
CNVR_4070	14	111279	1003680	892402	CNV	ENSBTAG00000048242	5S_rRNA	5S ribosomal RNA [Source:RFAM;Acc:RF00001]	Paralogs	rRNA	Entire gene
CNVR_4070	14	111279	1003680	892402	CNV	ENSBTAG00000048266	5S_rRNA	5S ribosomal RNA [Source:RFAM;Acc:RF00001]	Paralogs	rRNA	Entire gene
CNVR_4076	14	266465	454000	187536	DEL	ENSBTAG00000034261			Paralogs	protein_coding	Entire gene
CNVR_4076	14	266465	454000	187536	DEL	ENSBTAG00000044546	5S_rRNA	5S ribosomal RNA [Source:RFAM;Acc:RF00001]	Paralogs	rRNA	Entire gene
CNVR_4076	14	266465	454000	187536	DEL	ENSBTAG00000045780	5S_rRNA	5S ribosomal RNA [Source:RFAM;Acc:RF00001]	Paralogs	rRNA	Entire gene
CNVR_4076	14	266465	454000	187536	DEL	ENSBTAG00000045988	5S_rRNA	5S ribosomal RNA [Source:RFAM;Acc:RF00001]	Paralogs	rRNA	Entire gene
CNVR_4076	14	266465	454000	187536	DEL	ENSBTAG00000046592	U6	U6 spliceosomal RNA [Source:RFAM;Acc:RF00026]	Paralogs	snRNA	Entire gene
CNVR_4076	14	266465	454000	187536	DEL	ENSBTAG00000046822	U6	U6 spliceosomal RNA [Source:RFAM;Acc:RF00026]	Paralogs	snRNA	Entire gene
CNVR_4076	14	266465	454000	187536	DEL	ENSBTAG00000046827	5S_rRNA	5S ribosomal RNA [Source:RFAM;Acc:RF00001]	Paralogs	rRNA	Entire gene
CNVR_4076	14	266465	454000	187536	DEL	ENSBTAG00000047283	5S_rRNA	5S ribosomal RNA [Source:RFAM;Acc:RF00001]	Paralogs	rRNA	Entire gene
CNVR_4076	14	266465	454000	187536	DEL	ENSBTAG00000047792	5S_rRNA	5S ribosomal RNA [Source:RFAM;Acc:RF00001]	Paralogs	rRNA	Entire gene
CNVR_4076	14	266465	454000	187536	DEL	ENSBTAG00000047897	5S_rRNA	5S ribosomal RNA [Source:RFAM;Acc:RF00001]	Paralogs	rRNA	Entire gene
CNVR_4076	14	266465	454000	187536	DEL	ENSBTAG00000048266	5S_rRNA	5S ribosomal RNA [Source:RFAM;Acc:RF00001]	Paralogs	rRNA	Entire gene
CNVR_4077	14	240537	1125790	885254	CNV	ENSBTAG00000034176			Paralogs	protein_coding	Entire gene
CNVR_4077	14	240537	1125790	885254	CNV	ENSBTAG00000034261			Paralogs	protein_coding	Entire gene
CNVR_4077	14	240537	1125790	885254	CNV	ENSBTAG00000036045	5S_rRNA	5S ribosomal RNA [Source:RFAM;Acc:RF00001]	Paralogs	rRNA	Entire gene
CNVR_4077	14	240537	1125790	885254	CNV	ENSBTAG00000042158	U6	U6 spliceosomal RNA [Source:RFAM;Acc:RF00026]	Paralogs	snRNA	Entire gene
CNVR_4077	14	240537	1125790	885254	CNV	ENSBTAG00000044546	5S_rRNA	5S ribosomal RNA [Source:RFAM;Acc:RF00001]	Paralogs	rRNA	Entire gene
CNVR_4077	14	240537	1125790	885254	CNV	ENSBTAG00000045524	5S_rRNA	5S ribosomal RNA [Source:RFAM;Acc:RF00001]	Paralogs	rRNA	Entire gene
CNVR_4077	14	240537	1125790	885254	CNV	ENSBTAG00000045557	5S_rRNA	5S ribosomal RNA [Source:RFAM;Acc:RF00001]	Paralogs	rRNA	Entire gene
CNVR_4077	14	240537	1125790	885254	CNV	ENSBTAG00000045707	5S_rRNA	5S ribosomal RNA [Source:RFAM;Acc:RF00001]	Paralogs	rRNA	Entire gene
CNVR_4077	14	240537	1125790	885254	CNV	ENSBTAG00000045763			No_Paralogs	pseudogene	Entire gene
CNVR_4077	14	240537	1125790	885254	CNV	ENSBTAG00000045780	5S_rRNA	5S ribosomal RNA [Source:RFAM;Acc:RF00001]	Paralogs	rRNA	Entire gene
CNVR_4077	14	240537	1125790	885254	CNV	ENSBTAG00000045815	5S_rRNA	5S ribosomal RNA [Source:RFAM;Acc:RF00001]	Paralogs	rRNA	Entire gene
CNVR_4077	14	240537	1125790	885254	CNV	ENSBTAG00000045988	5S_rRNA	5S ribosomal RNA [Source:RFAM;Acc:RF00001]	Paralogs	rRNA	Entire gene
CNVR_4077	14	240537	1125790	885254	CNV	ENSBTAG00000046241	5S_rRNA	5S ribosomal RNA [Source:RFAM;Acc:RF00001]	Paralogs	rRNA	Entire gene
CNVR_4077	14	240537	1125790	885254	CNV	ENSBTAG00000046592	U6	U6 spliceosomal RNA [Source:RFAM;Acc:RF00026]	Paralogs	snRNA	Entire gene
CNVR_4077	14	240537	1125790	885254	CNV	ENSBTAG00000046719	5S_rRNA	5S ribosomal RNA [Source:RFAM;Acc:RF00001]	Paralogs	rRNA	Entire gene
CNVR_4077	14	240537	1125790	885254	CNV	ENSBTAG00000046822	U6	U6 spliceosomal RNA [Source:RFAM;Acc:RF00026]	Paralogs	snRNA	Entire gene
CNVR_4077	14	240537	1125790	885254	CNV	ENSBTAG00000046827	5S_rRNA	5S ribosomal RNA [Source:RFAM;Acc:RF00001]	Paralogs	rRNA	Entire gene
CNVR_4077	14	240537	1125790	885254	CNV	ENSBTAG00000046868			No_Paralogs	pseudogene	Entire gene
CNVR_4077	14	240537	1125790	885254	CNV	ENSBTAG00000047065	5S_rRNA	5S ribosomal RNA [Source:RFAM;Acc:RF00001]	Paralogs	rRNA	Entire gene
CNVR_4077	14	240537	1125790	885254	CNV	ENSBTAG00000047283	5S_rRNA	5S ribosomal RNA [Source:RFAM;Acc:RF00001]	Paralogs	rRNA	Entire gene
CNVR_4077	14	240537	1125790	885254	CNV	ENSBTAG00000047387	5S_rRNA	5S ribosomal RNA [Source:RFAM;Acc:RF00001]	Paralogs	rRNA	Entire gene
CNVR_4077	14	240537	1125790	885254	CNV	ENSBTAG00000047553	5S_rRNA	5S ribosomal RNA [Source:RFAM;Acc:RF00001]	Paralogs	rRNA	Entire gene
CNVR_4077	14	240537	1125790	885254	CNV	ENSBTAG00000047792	5S_rRNA	5S ribosomal RNA [Source:RFAM;Acc:RF00001]	Paralogs	rRNA	Entire gene
CNVR_4077	14	240537	1125790	885254	CNV	ENSBTAG00000047800	5S_rRNA	5S ribosomal RNA [Source:RFAM;Acc:RF00001]	Paralogs	rRNA	Entire gene
CNVR_4077	14	240537	1125790	885254	CNV	ENSBTAG00000047897	5S_rRNA	5S ribosomal RNA [Source:RFAM;Acc:RF00001]	Paralogs	rRNA	Entire gene
CNVR_4077	14	240537	1125790	885254	CNV	ENSBTAG00000048242	5S_rRNA	5S ribosomal RNA [Source:RFAM;Acc:RF00001]	Paralogs	rRNA	Entire gene
CNVR_4077	14	240537	1125790	885254	CNV	ENSBTAG00000048266	5S_rRNA	5S ribosomal RNA [Source:RFAM;Acc:RF00001]	Paralogs	rRNA	Entire gene
CNVR_4083	14	374660	734706	360047	CNV	ENSBTAG00000034176			Paralogs	protein_coding	Some exons
CNVR_4083	14	374660	734706	360047	CNV	ENSBTAG00000042158	U6	U6 spliceosomal RNA [Source:RFAM;Acc:RF00026]	Paralogs	snRNA	Entire gene
CNVR_4083	14	374660	734706	360047	CNV	ENSBTAG00000044546	5S_rRNA	5S ribosomal RNA [Source:RFAM;Acc:RF00001]	Paralogs	rRNA	Entire gene
CNVR_4083	14	374660	734706	360047	CNV	ENSBTAG00000045524	5S_rRNA	5S ribosomal RNA [Source:RFAM;Acc:RF00001]	Paralogs	rRNA	Entire gene
CNVR_4083	14	374660	734706	360047	CNV	ENSBTAG00000045707	5S_rRNA	5S ribosomal RNA [Source:RFAM;Acc:RF00001]	Paralogs	rRNA	Entire gene
CNVR_4083	14	374660	734706	360047	CNV	ENSBTAG00000045780	5S_rRNA	5S ribosomal RNA [Source:RFAM;Acc:RF00001]	Paralogs	rRNA	Entire gene
CNVR_4083	14	374660	734706	360047	CNV	ENSBTAG00000045815	5S_rRNA	5S ribosomal RNA [Source:RFAM;Acc:RF00001]	Paralogs	rRNA	Entire gene
CNVR_4083	14	374660	734706	360047	CNV	ENSBTAG00000046241	5S_rRNA	5S ribosomal RNA [Source:RFAM;Acc:RF00001]	Paralogs	rRNA	Entire gene
CNVR_4083	14	374660	734706	360047	CNV	ENSBTAG00000046592	U6	U6 spliceosomal RNA [Source:RFAM;Acc:RF00026]	Paralogs	snRNA	Entire gene
CNVR_4083	14	374660	734706	360047	CNV	ENSBTAG00000046719	5S_rRNA	5S ribosomal RNA [Source:RFAM;Acc:RF00001]	Paralogs	rRNA	Entire gene
CNVR_4083	14	374660	734706	360047	CNV	ENSBTAG00000047065	5S_rRNA	5S ribosomal RNA [Source:RFAM;Acc:RF00001]	Paralogs	rRNA	Entire gene
CNVR_4083	14	374660	734706	360047	CNV	ENSBTAG00000047387	5S_rRNA	5S ribosomal RNA [Source:RFAM;Acc:RF00001]	Paralogs	rRNA	Entire gene
CNVR_4083	14	374660	734706	360047	CNV	ENSBTAG00000047800	5S_rRNA	5S ribosomal RNA [Source:RFAM;Acc:RF00001]	Paralogs	rRNA	Entire gene
CNVR_4083	14	374660	734706	360047	CNV	ENSBTAG00000047897	5S_rRNA	5S ribosomal RNA [Source:RFAM;Acc:RF00001]	Paralogs	rRNA	Entire gene
CNVR_4083	14	374660	734706	360047	CNV	ENSBTAG00000048242	5S_rRNA	5S ribosomal RNA [Source:RFAM;Acc:RF00001]	Paralogs	rRNA	Entire gene
CNVR_4088	14	470417	660748	190332	CNV	ENSBTAG00000045524	5S_rRNA	5S ribosomal RNA [Source:RFAM;Acc:RF00001]	Paralogs	rRNA	Entire gene
CNVR_4088	14	470417	660748	190332	CNV	ENSBTAG00000045707	5S_rRNA	5S ribosomal RNA [Source:RFAM;Acc:RF00001]	Paralogs	rRNA	Entire gene
CNVR_4088	14	470417	660748	190332	CNV	ENSBTAG00000045815	5S_rRNA	5S ribosomal RNA [Source:RFAM;Acc:RF00001]	Paralogs	rRNA	Entire gene
CNVR_4088	14	470417	660748	190332	CNV	ENSBTAG00000046241	5S_rRNA	5S ribosomal RNA [Source:RFAM;Acc:RF00001]	Paralogs	rRNA	Entire gene
CNVR_4088	14	470417	660748	190332	CNV	ENSBTAG00000046719	5S_rRNA	5S ribosomal RNA [Source:RFAM;Acc:RF00001]	Paralogs	rRNA	Entire gene
CNVR_4088	14	470417	660748	190332	CNV	ENSBTAG00000047065	5S_rRNA	5S ribosomal RNA [Source:RFAM;Acc:RF00001]	Paralogs	rRNA	Entire gene
CNVR_4088	14	470417	660748	190332	CNV	ENSBTAG00000047387	5S_rRNA	5S ribosomal RNA [Source:RFAM;Acc:RF00001]	Paralogs	rRNA	Entire gene
CNVR_4088	14	470417	660748	190332	CNV	ENSBTAG00000047800	5S_rRNA	5S ribosomal RNA [Source:RFAM;Acc:RF00001]	Paralogs	rRNA	Entire gene
CNVR_4088	14	470417	660748	190332	CNV	ENSBTAG00000048242	5S_rRNA	5S ribosomal RNA [Source:RFAM;Acc:RF00001]	Paralogs	rRNA	Entire gene
CNVR_4090	14	492038	583657	91620	DEL	ENSBTAG00000045524	5S_rRNA	5S ribosomal RNA [Source:RFAM;Acc:RF00001]	Paralogs	rRNA	Entire gene
CNVR_4090	14	492038	583657	91620	DEL	ENSBTAG00000045707	5S_rRNA	5S ribosomal RNA [Source:RFAM;Acc:RF00001]	Paralogs	rRNA	Entire gene
CNVR_4090	14	492038	583657	91620	DEL	ENSBTAG00000045815	5S_rRNA	5S ribosomal RNA [Source:RFAM;Acc:RF00001]	Paralogs	rRNA	Entire gene
CNVR_4090	14	492038	583657	91620	DEL	ENSBTAG00000046241	5S_rRNA	5S ribosomal RNA [Source:RFAM;Acc:RF00001]	Paralogs	rRNA	Entire gene
CNVR_4090	14	492038	583657	91620	DEL	ENSBTAG00000047065	5S_rRNA	5S ribosomal RNA [Source:RFAM;Acc:RF00001]	Paralogs	rRNA	Entire gene
CNVR_4090	14	492038	583657	91620	DEL	ENSBTAG00000047800	5S_rRNA	5S ribosomal RNA [Source:RFAM;Acc:RF00001]	Paralogs	rRNA	Entire gene
CNVR_4093	14	550229	638468	88240	CNV	ENSBTAG00000045815	5S_rRNA	5S ribosomal RNA [Source:RFAM;Acc:RF00001]	Paralogs	rRNA	Entire gene
CNVR_4093	14	550229	638468	88240	CNV	ENSBTAG00000047065	5S_rRNA	5S ribosomal RNA [Source:RFAM;Acc:RF00001]	Paralogs	rRNA	Entire gene
CNVR_4105	14	569501	635352	65852	CNV	ENSBTAG00000045815	5S_rRNA	5S ribosomal RNA [Source:RFAM;Acc:RF00001]	Paralogs	rRNA	Entire gene
CNVR_4105	14	569501	635352	65852	CNV	ENSBTAG00000047065	5S_rRNA	5S ribosomal RNA [Source:RFAM;Acc:RF00001]	Paralogs	rRNA	Entire gene
CNVR_4107	14	595197	1109654	514458	CNV	ENSBTAG00000034176			Paralogs	protein_coding	Entire gene
CNVR_4107	14	595197	1109654	514458	CNV	ENSBTAG00000042158	U6	U6 spliceosomal RNA [Source:RFAM;Acc:RF00026]	Paralogs	snRNA	Entire gene
CNVR_4107	14	595197	1109654	514458	CNV	ENSBTAG00000045557	5S_rRNA	5S ribosomal RNA [Source:RFAM;Acc:RF00001]	Paralogs	rRNA	Entire gene
CNVR_4107	14	595197	1109654	514458	CNV	ENSBTAG00000045763			No_Paralogs	pseudogene	Entire gene
CNVR_4120	14	847251	1349565	502315	DEL	ENSBTAG00000003273			No_Paralogs	pseudogene	Entire gene
CNVR_4120	14	847251	1349565	502315	DEL	ENSBTAG00000006597			No_Paralogs	pseudogene	Entire gene
CNVR_4120	14	847251	1349565	502315	DEL	ENSBTAG00000036098			Paralogs	protein_coding	Entire gene
CNVR_4120	14	847251	1349565	502315	DEL	ENSBTAG00000045557	5S_rRNA	5S ribosomal RNA [Source:RFAM;Acc:RF00001]	Paralogs	rRNA	Entire gene
CNVR_4120	14	847251	1349565	502315	DEL	ENSBTAG00000045579			Paralogs	protein_coding	Entire gene
CNVR_4120	14	847251	1349565	502315	DEL	ENSBTAG00000045654			No_Paralogs	pseudogene	Entire gene
CNVR_4120	14	847251	1349565	502315	DEL	ENSBTAG00000045763			No_Paralogs	pseudogene	Entire gene
CNVR_4120	14	847251	1349565	502315	DEL	ENSBTAG00000046435			Paralogs	protein_coding	Entire gene
CNVR_4120	14	847251	1349565	502315	DEL	ENSBTAG00000046932			Paralogs	protein_coding	Entire gene
CNVR_4120	14	847251	1349565	502315	DEL	ENSBTAG00000047447	5S_rRNA	5S ribosomal RNA [Source:RFAM;Acc:RF00001]	Paralogs	rRNA	Entire gene
CNVR_4120	14	847251	1349565	502315	DEL	ENSBTAG00000047553	5S_rRNA	5S ribosomal RNA [Source:RFAM;Acc:RF00001]	Paralogs	rRNA	Entire gene
CNVR_4120	14	847251	1349565	502315	DEL	ENSBTAG00000048001			Paralogs	protein_coding	Entire gene
CNVR_4123	14	952643	957190	4548	DEL	ENSBTAG00000045557	5S_rRNA	5S ribosomal RNA [Source:RFAM;Acc:RF00001]	Paralogs	rRNA	Entire gene
CNVR_4128	14	1091764	1135624	43861	DEL	ENSBTAG00000045654			No_Paralogs	pseudogene	Entire gene
CNVR_4128	14	1091764	1135624	43861	DEL	ENSBTAG00000047553	5S_rRNA	5S ribosomal RNA [Source:RFAM;Acc:RF00001]	Paralogs	rRNA	Entire gene
CNVR_11676	27	10742343	15979016	5236674	DEL	ENSBTAG00000018864	CENPU	centromere protein U [Source:HGNC Symbol;Acc:HGNC:21348]	No_Paralogs	protein_coding	Entire gene
CNVR_4136	14	2696382	2738579	42198	CNV	ENSBTAG00000004596			Paralogs	protein_coding	Entire gene
CNVR_4155	14	5614984	5622456	7473	DEL	ENSBTAG00000018218			Paralogs	protein_coding	Intron
CNVR_4184	14	11366082	11420250	54169	DEL	ENSBTAG00000003185	ASAP1	arf-GAP with SH3 domain, ANK repeat and PH domain-containing protein 1 [Source:RefSeq peptide;Acc:NP_787015]	Paralogs	protein_coding	Intron
CNVR_4185	14	11417365	11417733	369	DEL	ENSBTAG00000003185	ASAP1	arf-GAP with SH3 domain, ANK repeat and PH domain-containing protein 1 [Source:RefSeq peptide;Acc:NP_787015]	Paralogs	protein_coding	Intron
CNVR_4187	14	11860748	11861409	662	DEL	ENSBTAG00000020801	FAM49B	family with sequence similarity 49 member B [Source:HGNC Symbol;Acc:HGNC:25216]	Paralogs	protein_coding	Intron
CNVR_4220	14	14632891	15422273	789383	DEL	ENSBTAG00000045398	bta-mir-2310	bta-mir-2310 [Source:miRBase;Acc:MI0011323]	No_Paralogs	miRNA	Entire gene
CNVR_4330	14	21886501	21893000	6500	DEL	ENSBTAG00000027760			No_Paralogs	pseudogene	Entire gene
CNVR_11676	27	10742343	15979016	5236674	DEL	ENSBTAG00000013211	CFAP97	cilia and flagella associated protein 97 [Source:HGNC Symbol;Acc:HGNC:29276]	No_Paralogs	protein_coding	Entire gene
CNVR_4360	14	31144966	31145755	790	DEL	ENSBTAG00000001299	CYP7B1	cytochrome P450 family 7 subfamily B member 1 [Source:HGNC Symbol;Acc:HGNC:2652]	Paralogs	protein_coding	Intron
CNVR_4369	14	33296316	33297697	1382	DEL	ENSBTAG00000014689	CSPP1	centrosome and spindle pole-associated protein 1 [Source:RefSeq peptide;Acc:NP_001179944]	No_Paralogs	protein_coding	Intron
CNVR_4370	14	33419751	33421589	1839	DEL	ENSBTAG00000014691	ARFGEF1	ADP ribosylation factor guanine nucleotide exchange factor 1 [Source:HGNC Symbol;Acc:HGNC:15772]	Paralogs	protein_coding	Intron
CNVR_4371	14	33449701	33454000	4300	DEL	ENSBTAG00000014691	ARFGEF1	ADP ribosylation factor guanine nucleotide exchange factor 1 [Source:HGNC Symbol;Acc:HGNC:15772]	Paralogs	protein_coding	Intron
CNVR_4404	14	38225501	38228500	3000	DEL	ENSBTAG00000040496	KCNB2	potassium voltage-gated channel subfamily B member 2 [Source:HGNC Symbol;Acc:HGNC:6232]	Paralogs	protein_coding	Intron
CNVR_4405	14	38321588	38323569	1982	DEL	ENSBTAG00000040496	KCNB2	potassium voltage-gated channel subfamily B member 2 [Source:HGNC Symbol;Acc:HGNC:6232]	Paralogs	protein_coding	Intron
CNVR_4433	14	44041448	44042222	775	DEL	ENSBTAG00000018902	ZC2HC1A	zinc finger C2HC-type containing 1A [Source:HGNC Symbol;Acc:HGNC:24277]	Paralogs	protein_coding	Intron
CNVR_4440	14	45402189	45472628	70440	DEL	ENSBTAG00000001302	MRPS28	mitochondrial ribosomal protein S28 [Source:HGNC Symbol;Acc:HGNC:14513]	No_Paralogs	protein_coding	Intron
CNVR_4459	14	50888974	50889755	782	DEL	ENSBTAG00000017694	TRPS1	transcriptional repressor GATA binding 1 [Source:HGNC Symbol;Acc:HGNC:12340]	Paralogs	protein_coding	Intron
CNVR_4486	14	54019251	54026100	6850	DUP	ENSBTAG00000038281	CSMD3	CUB and Sushi multiple domains 3 [Source:HGNC Symbol;Acc:HGNC:19291]	Paralogs	protein_coding	Intron
CNVR_4488	14	54112001	54128000	16000	DEL	ENSBTAG00000038281	CSMD3	CUB and Sushi multiple domains 3 [Source:HGNC Symbol;Acc:HGNC:19291]	Paralogs	protein_coding	Intron
CNVR_4564	14	62318001	62322250	4250	DEL	ENSBTAG00000021240	DCSTAMP	dendrocyte expressed seven transmembrane protein [Source:HGNC Symbol;Acc:HGNC:18549]	No_Paralogs	protein_coding	Intron
CNVR_4568	14	62869204	63401279	532076	DEL	ENSBTAG00000010529	FZD6	frizzled class receptor 6 [Source:HGNC Symbol;Acc:HGNC:4044]	Paralogs	protein_coding	Entire gene
CNVR_6662	18	2662416	2676580	14165	DEL	ENSBTAG00000015427	CFDP1	craniofacial development protein 1 [Source:HGNC Symbol;Acc:HGNC:1873]	No_Paralogs	protein_coding	Some exons
CNVR_17969	8	70820520	71241182	420663	DEL	ENSBTAG00000013528	CHMP7	Bos taurus charged multivesicular body protein 7	No_Paralogs	protein_coding	Some exons
CNVR_4568	14	62869204	63401279	532076	DEL	ENSBTAG00000033902	SLC25A32	solute carrier family 25 member 32 [Source:HGNC Symbol;Acc:HGNC:29683]	Paralogs	protein_coding	Entire gene
CNVR_4578	14	64906399	64907750	1352	DEL	ENSBTAG00000004518	GRHL2	grainyhead like transcription factor 2 [Source:HGNC Symbol;Acc:HGNC:2799]	Paralogs	protein_coding	Intron
CNVR_4591	14	67310991	67311814	824	DEL	ENSBTAG00000047534			Paralogs	protein_coding	Some exons
CNVR_4593	14	67929979	67931500	1522	DEL	ENSBTAG00000026234	STK3	serine/threonine kinase 3 [Source:HGNC Symbol;Acc:HGNC:11406]	Paralogs	protein_coding	Intron
CNVR_4640	14	76762268	76763159	892	DEL	ENSBTAG00000006877	MMP16	matrix metallopeptidase 16 [Source:HGNC Symbol;Acc:HGNC:7162]	Paralogs	protein_coding	Intron
CNVR_4660	14	78690001	78695250	5250	DEL	ENSBTAG00000015720	WWP1	WW domain containing E3 ubiquitin protein ligase 1 [Source:HGNC Symbol;Acc:HGNC:17004]	Paralogs	protein_coding	Intron
CNVR_4661	14	79159501	79329500	170000	DEL	ENSBTAG00000002851			Paralogs	protein_coding	Entire gene
CNVR_4667	14	79523028	79591749	68722	DEL	ENSBTAG00000032236		Carbonic anhydrase 1 [Source:UniProtKB/Swiss-Prot;Acc:Q1LZA1]	Paralogs	protein_coding	3' UTR
CNVR_4667	14	79523028	79591749	68722	DEL	ENSBTAG00000036116			Paralogs	protein_coding	Entire gene
CNVR_4673	14	80086251	80091750	5500	DEL	ENSBTAG00000017717	RALYL	RALY RNA binding protein-like [Source:HGNC Symbol;Acc:HGNC:27036]	Paralogs	protein_coding	Intron
CNVR_4733	14	84433869	84435401	1533	DEL	ENSBTAG00000044126	SNTB1	syntrophin beta 1 [Source:HGNC Symbol;Acc:HGNC:11168]	Paralogs	protein_coding	Intron
CNVR_4816	15	7077751	7078862	1112	DEL	ENSBTAG00000020032	CEP126	centrosomal protein 126 [Source:HGNC Symbol;Acc:HGNC:29264]	No_Paralogs	protein_coding	Intron
CNVR_4826	15	8201123	8210788	9666	DEL	ENSBTAG00000024648	PGR		Paralogs	protein_coding	Intron
CNVR_4904	15	16883001	16895700	12700	DEL	ENSBTAG00000044144	GUCY1A2	guanylate cyclase 1 soluble subunit alpha 2 [Source:HGNC Symbol;Acc:HGNC:4684]	Paralogs	protein_coding	Intron
CNVR_4909	15	16982325	16984545	2221	DEL	ENSBTAG00000044144	GUCY1A2	guanylate cyclase 1 soluble subunit alpha 2 [Source:HGNC Symbol;Acc:HGNC:4684]	Paralogs	protein_coding	Intron
CNVR_4948	15	22115280	22115818	539	DEL	ENSBTAG00000034346	BTG4	BTG anti-proliferation factor 4 [Source:HGNC Symbol;Acc:HGNC:13862]	Paralogs	protein_coding	Intron
CNVR_4998	15	35697827	35699136	1310	DEL	ENSBTAG00000017468	NUCB2	nucleobindin 2 [Source:HGNC Symbol;Acc:HGNC:8044]	Paralogs	protein_coding	Intron
CNVR_5012	15	39061448	39062617	1170	DEL	ENSBTAG00000009150	SPON1	spondin 1 [Source:HGNC Symbol;Acc:HGNC:11252]	Paralogs	protein_coding	Intron
CNVR_5020	15	41791751	41794250	2500	DEL	ENSBTAG00000002914	GALNT18	polypeptide N-acetylgalactosaminyltransferase 18 [Source:HGNC Symbol;Acc:HGNC:30488]	Paralogs	protein_coding	Intron
CNVR_5028	15	43133962	43135874	1913	DEL	ENSBTAG00000043981	SBF2	SET binding factor 2 [Source:HGNC Symbol;Acc:HGNC:2135]	Paralogs	protein_coding	Intron
CNVR_5031	15	43420411	43422384	1974	DEL	ENSBTAG00000043981	SBF2	SET binding factor 2 [Source:HGNC Symbol;Acc:HGNC:2135]	Paralogs	protein_coding	Intron
CNVR_5079	15	46837953	46991837	153885	DEL	ENSBTAG00000004443			No_Paralogs	protein_coding	Entire gene
CNVR_5079	15	46837953	46991837	153885	DEL	ENSBTAG00000037937			Paralogs	protein_coding	Entire gene
CNVR_5079	15	46837953	46991837	153885	DEL	ENSBTAG00000037991			Paralogs	protein_coding	Entire gene
CNVR_5092	15	47843096	47985328	142233	DEL	ENSBTAG00000009044	OR52N1	olfactory receptor family 52 subfamily N member 1 [Source:HGNC Symbol;Acc:HGNC:14853]	Paralogs	protein_coding	Entire gene
CNVR_5092	15	47843096	47985328	142233	DEL	ENSBTAG00000036326			Paralogs	protein_coding	Entire gene
CNVR_5092	15	47843096	47985328	142233	DEL	ENSBTAG00000036328			Paralogs	protein_coding	Entire gene
CNVR_5092	15	47843096	47985328	142233	DEL	ENSBTAG00000040480			Paralogs	protein_coding	Entire gene
CNVR_5092	15	47843096	47985328	142233	DEL	ENSBTAG00000043009	U6	U6 spliceosomal RNA [Source:RFAM;Acc:RF00026]	Paralogs	snRNA	Entire gene
CNVR_5105	15	48326608	48328174	1567	DEL	ENSBTAG00000005609			Paralogs	protein_coding	Some exons
CNVR_5131	15	49557944	49703488	145545	CNV	ENSBTAG00000014853			Paralogs	protein_coding	Entire gene
CNVR_5131	15	49557944	49703488	145545	CNV	ENSBTAG00000037398	OR51T1	olfactory receptor family 51 subfamily T member 1 [Source:HGNC Symbol;Acc:HGNC:15205]	Paralogs	protein_coding	Entire gene
CNVR_5131	15	49557944	49703488	145545	CNV	ENSBTAG00000038727			Paralogs	protein_coding	Entire gene
CNVR_5131	15	49557944	49703488	145545	CNV	ENSBTAG00000039253	OR51F2	olfactory receptor family 51 subfamily F member 2 [Source:HGNC Symbol;Acc:HGNC:15197]	Paralogs	protein_coding	Entire gene
CNVR_5131	15	49557944	49703488	145545	CNV	ENSBTAG00000039651			Paralogs	protein_coding	Entire gene
CNVR_5131	15	49557944	49703488	145545	CNV	ENSBTAG00000040236			Paralogs	protein_coding	Entire gene
CNVR_5131	15	49557944	49703488	145545	CNV	ENSBTAG00000047178			Paralogs	protein_coding	Entire gene
CNVR_5131	15	49557944	49703488	145545	CNV	ENSBTAG00000048220			No_Paralogs	pseudogene	Entire gene
CNVR_5135	15	49857301	49959500	102200	DEL	ENSBTAG00000035006			Paralogs	protein_coding	Entire gene
CNVR_5135	15	49857301	49959500	102200	DEL	ENSBTAG00000035008			Paralogs	protein_coding	Entire gene
CNVR_5135	15	49857301	49959500	102200	DEL	ENSBTAG00000040139			No_Paralogs	pseudogene	Entire gene
CNVR_5135	15	49857301	49959500	102200	DEL	ENSBTAG00000045872			No_Paralogs	pseudogene	Entire gene
CNVR_5150	15	50687501	50779723	92223	CNV	ENSBTAG00000037474			Paralogs	protein_coding	Entire gene
CNVR_5150	15	50687501	50779723	92223	CNV	ENSBTAG00000038170			Paralogs	protein_coding	Entire gene
CNVR_5150	15	50687501	50779723	92223	CNV	ENSBTAG00000039134			Paralogs	protein_coding	Entire gene
CNVR_5150	15	50687501	50779723	92223	CNV	ENSBTAG00000046816		olfactory receptor family 51 subfamily G member 1	Paralogs	protein_coding	Entire gene
CNVR_5150	15	50687501	50779723	92223	CNV	ENSBTAG00000047500			No_Paralogs	pseudogene	Entire gene
CNVR_5150	15	50687501	50779723	92223	CNV	ENSBTAG00000047714	OR51A7	olfactory receptor family 51 subfamily A member 7 [Source:HGNC Symbol;Acc:HGNC:15188]	Paralogs	protein_coding	Entire gene
CNVR_5150	15	50687501	50779723	92223	CNV	ENSBTAG00000046627	OR51L1	olfactory receptor family 51 subfamily L member 1 [Source:HGNC Symbol;Acc:HGNC:14759]	Paralogs	protein_coding	5' UTR
CNVR_5159	15	51551286	51579184	27899	DEL	ENSBTAG00000047860			Paralogs	protein_coding	Entire gene
CNVR_5172	15	51945008	51945719	712	DEL	ENSBTAG00000013109	STIM1	stromal interaction molecule 1 [Source:HGNC Symbol;Acc:HGNC:11386]	Paralogs	protein_coding	Intron
CNVR_5174	15	52197773	52216345	18573	DEL	ENSBTAG00000006345	ART1		Paralogs	protein_coding	5' UTR
CNVR_5181	15	52383247	52384812	1566	DEL	ENSBTAG00000014167	RNF121	ring finger protein 121 [Source:HGNC Symbol;Acc:HGNC:21070]	Paralogs	protein_coding	Intron
CNVR_5186	15	52756380	52757185	806	DEL	ENSBTAG00000001280	CLPB	ClpB homolog, mitochondrial AAA ATPase chaperonin [Source:HGNC Symbol;Acc:HGNC:30664]	No_Paralogs	protein_coding	Intron
CNVR_5188	15	53286460	53287990	1531	DEL	ENSBTAG00000019062	FCHSD2	FCH and double SH3 domains 2 [Source:HGNC Symbol;Acc:HGNC:29114]	No_Paralogs	protein_coding	Intron
CNVR_5196	15	55261650	55263031	1382	DEL	ENSBTAG00000020485	ARRB1	arrestin beta 1 [Source:HGNC Symbol;Acc:HGNC:711]	Paralogs	protein_coding	Intron
CNVR_5202	15	56641950	56642879	930	DEL	ENSBTAG00000010826	C11orf30	protein EMSY [Source:RefSeq peptide;Acc:NP_001193751]	No_Paralogs	protein_coding	Intron
CNVR_17986	8	71195146	71232533	37388	DEL	ENSBTAG00000013528	CHMP7	Bos taurus charged multivesicular body protein 7	No_Paralogs	protein_coding	Some exons
CNVR_5227	15	59072695	59660475	587781	DEL	ENSBTAG00000002117	KIF18A	kinesin family member 18A [Source:HGNC Symbol;Acc:HGNC:29441]	Paralogs	protein_coding	Entire gene
CNVR_5227	15	59072695	59660475	587781	DEL	ENSBTAG00000008134	BDNF	brain derived neurotrophic factor [Source:HGNC Symbol;Acc:HGNC:1033]	Paralogs	protein_coding	Entire gene
CNVR_5230	15	59651466	59652904	1439	DEL	ENSBTAG00000003361	METTL15	methyltransferase like 15 [Source:HGNC Symbol;Acc:HGNC:26606]	No_Paralogs	protein_coding	Intron
CNVR_5250	15	64951467	65016783	65317	DEL	ENSBTAG00000012846	KIAA1549L	KIAA1549 like [Source:HGNC Symbol;Acc:HGNC:24836]	Paralogs	protein_coding	Some exons
CNVR_5341	15	78545397	78545755	359	DEL	ENSBTAG00000002520	CELF1	CUGBP Elav-like family member 1 [Source:HGNC Symbol;Acc:HGNC:2549]	Paralogs	protein_coding	Intron
CNVR_5349	15	79136110	79151229	15120	DEL	ENSBTAG00000000926			Paralogs	protein_coding	Some exons
CNVR_5349	15	79136110	79151229	15120	DEL	ENSBTAG00000005914			Paralogs	protein_coding	3' UTR
CNVR_5383	15	80418723	80947245	528523	CNV	ENSBTAG00000014513			No_Paralogs	pseudogene	Entire gene
CNVR_5383	15	80418723	80947245	528523	CNV	ENSBTAG00000022858			Paralogs	protein_coding	Entire gene
CNVR_5383	15	80418723	80947245	528523	CNV	ENSBTAG00000023310			Paralogs	protein_coding	Entire gene
CNVR_5383	15	80418723	80947245	528523	CNV	ENSBTAG00000024423			Paralogs	protein_coding	Entire gene
CNVR_5383	15	80418723	80947245	528523	CNV	ENSBTAG00000035029			Paralogs	protein_coding	Entire gene
CNVR_5383	15	80418723	80947245	528523	CNV	ENSBTAG00000035031			Paralogs	protein_coding	Entire gene
CNVR_5383	15	80418723	80947245	528523	CNV	ENSBTAG00000035059			Paralogs	protein_coding	Entire gene
CNVR_5383	15	80418723	80947245	528523	CNV	ENSBTAG00000035985			Paralogs	protein_coding	Entire gene
CNVR_5383	15	80418723	80947245	528523	CNV	ENSBTAG00000035986			Paralogs	protein_coding	Entire gene
CNVR_5383	15	80418723	80947245	528523	CNV	ENSBTAG00000035988			Paralogs	protein_coding	Entire gene
CNVR_5383	15	80418723	80947245	528523	CNV	ENSBTAG00000035989			Paralogs	protein_coding	Entire gene
CNVR_5383	15	80418723	80947245	528523	CNV	ENSBTAG00000035990			Paralogs	protein_coding	Entire gene
CNVR_5383	15	80418723	80947245	528523	CNV	ENSBTAG00000038049			Paralogs	protein_coding	Entire gene
CNVR_5383	15	80418723	80947245	528523	CNV	ENSBTAG00000038479			Paralogs	protein_coding	Entire gene
CNVR_5383	15	80418723	80947245	528523	CNV	ENSBTAG00000039348			Paralogs	protein_coding	Entire gene
CNVR_5383	15	80418723	80947245	528523	CNV	ENSBTAG00000045723			Paralogs	protein_coding	Entire gene
CNVR_5383	15	80418723	80947245	528523	CNV	ENSBTAG00000046167	OR5J2	olfactory receptor family 5 subfamily J member 2 [Source:HGNC Symbol;Acc:HGNC:19612]	Paralogs	protein_coding	Entire gene
CNVR_5383	15	80418723	80947245	528523	CNV	ENSBTAG00000046274			Paralogs	protein_coding	Entire gene
CNVR_5383	15	80418723	80947245	528523	CNV	ENSBTAG00000046710			Paralogs	protein_coding	Entire gene
CNVR_5383	15	80418723	80947245	528523	CNV	ENSBTAG00000046801			Paralogs	protein_coding	Entire gene
CNVR_5383	15	80418723	80947245	528523	CNV	ENSBTAG00000046845			Paralogs	protein_coding	Entire gene
CNVR_5383	15	80418723	80947245	528523	CNV	ENSBTAG00000047721			Paralogs	protein_coding	Entire gene
CNVR_5430	15	83156008	83157053	1046	DEL	ENSBTAG00000046460			Paralogs	protein_coding	Some exons
CNVR_5433	15	83257804	83263500	5697	DEL	ENSBTAG00000024657			Paralogs	protein_coding	Intron
CNVR_5435	15	83367579	83368270	692	DEL	ENSBTAG00000038058			Paralogs	protein_coding	Intron
CNVR_5442	15	83641756	83642620	865	DEL	ENSBTAG00000004046	DTX4	deltex E3 ubiquitin ligase 4 [Source:HGNC Symbol;Acc:HGNC:29151]	Paralogs	protein_coding	Intron
CNVR_5443	15	83726062	83862566	136505	CNV	ENSBTAG00000005255		Bos taurus olfactory receptor-like	Paralogs	protein_coding	Entire gene
CNVR_5443	15	83726062	83862566	136505	CNV	ENSBTAG00000039760			Paralogs	protein_coding	Entire gene
CNVR_5479	16	421501	428000	6500	DEL	ENSBTAG00000046445			No_Paralogs	pseudogene	Entire gene
CNVR_5483	16	838701	911473	72773	DEL	ENSBTAG00000015711	BTG2	BTG anti-proliferation factor 2 [Source:HGNC Symbol;Acc:HGNC:1131]	Paralogs	protein_coding	Entire gene
CNVR_5498	16	4538485	4539228	744	DEL	ENSBTAG00000019798	PIGR	polymeric immunoglobulin receptor [Source:HGNC Symbol;Acc:HGNC:8968]	Paralogs	protein_coding	Some exons
CNVR_5514	16	5559248	5644678	85431	DEL	ENSBTAG00000024647			Paralogs	protein_coding	Some exons
CNVR_5514	16	5559248	5644678	85431	DEL	ENSBTAG00000047228			No_Paralogs	pseudogene	Entire gene
CNVR_5514	16	5559248	5644678	85431	DEL	ENSBTAG00000023177			Paralogs	protein_coding	5' UTR
CNVR_5518	16	5635230	5978304	343075	DEL	ENSBTAG00000040409		uncharacterized protein LOC790886 precursor [Source:RefSeq peptide;Acc:NP_001098497]	Paralogs	protein_coding	Entire gene
CNVR_5518	16	5635230	5978304	343075	DEL	ENSBTAG00000024647			Paralogs	protein_coding	5' UTR
CNVR_5523	16	5822954	5825469	2516	DEL	ENSBTAG00000024647			Paralogs	protein_coding	Intron
CNVR_5527	16	5875926	6048091	172166	DEL	ENSBTAG00000024647			Paralogs	protein_coding	5' UTR
CNVR_5527	16	5875926	6048091	172166	DEL	ENSBTAG00000040409		uncharacterized protein LOC790886 precursor [Source:RefSeq peptide;Acc:NP_001098497]	Paralogs	protein_coding	5' UTR
CNVR_5535	16	6155673	6156891	1219	DEL	ENSBTAG00000047966			No_Paralogs	processed_pseudogene	Entire gene
CNVR_5540	16	6646464	7788277	1141814	DEL	ENSBTAG00000016729	KCNT2	potassium sodium-activated channel subfamily T member 2 [Source:HGNC Symbol;Acc:HGNC:18866]	Paralogs	protein_coding	3' UTR
CNVR_5666	16	13752751	13755750	3000	DEL	ENSBTAG00000013064	RGS18	regulator of G protein signaling 18 [Source:HGNC Symbol;Acc:HGNC:14261]	Paralogs	protein_coding	Intron
CNVR_5692	16	16036850	16038801	1952	DEL	ENSBTAG00000008420	BRINP3	BMP/retinoic acid inducible neural specific 3 [Source:HGNC Symbol;Acc:HGNC:22393]	Paralogs	protein_coding	Intron
CNVR_5740	16	19756730	19760079	3350	DEL	ENSBTAG00000006188	USH2A	usherin [Source:RefSeq peptide;Acc:NP_001178354]	Paralogs	protein_coding	Intron
CNVR_5751	16	20595956	20608460	12505	DEL	ENSBTAG00000010392	ESRRG	estrogen related receptor gamma [Source:HGNC Symbol;Acc:HGNC:3474]	Paralogs	protein_coding	Some exons
CNVR_5765	16	23366991	23367978	988	DEL	ENSBTAG00000015534	LYPLAL1	lysophospholipase like 1 [Source:HGNC Symbol;Acc:HGNC:20440]	Paralogs	protein_coding	Intron
CNVR_5780	16	26732178	26733132	955	DEL	ENSBTAG00000017561	HHIPL2	HHIP like 2 [Source:HGNC Symbol;Acc:HGNC:25842]	Paralogs	protein_coding	Intron
CNVR_5791	16	29601501	29602312	812	DEL	ENSBTAG00000000140	EPHX1	epoxide hydrolase 1 [Source:HGNC Symbol;Acc:HGNC:3401]	No_Paralogs	protein_coding	Intron
CNVR_5798	16	32159704	32161031	1328	DEL	ENSBTAG00000033180	SMYD3	SET and MYND domain containing 3 [Source:HGNC Symbol;Acc:HGNC:15513]	Paralogs	protein_coding	Intron
CNVR_5817	16	36375975	36377552	1578	DEL	ENSBTAG00000005410	RGS7	Regulator of G-protein signaling 7 [Source:UniProtKB/Swiss-Prot;Acc:O46470]	Paralogs	protein_coding	Intron
CNVR_5842	16	39371354	39373107	1754	DEL	ENSBTAG00000006408	MROH9	maestro heat like repeat family member 9 [Source:HGNC Symbol;Acc:HGNC:26287]	Paralogs	protein_coding	Intron
CNVR_5844	16	40158856	40160408	1553	DEL	ENSBTAG00000014319	DNM3		Paralogs	protein_coding	Intron
CNVR_5863	16	45413001	45414366	1366	DEL	ENSBTAG00000013411		enolase 1 [Source:HGNC Symbol;Acc:HGNC:3350]	Paralogs	protein_coding	Intron
CNVR_5911	16	59026837	59219661	192825	DEL	ENSBTAG00000018303	PAPPA2	pappalysin 2 [Source:HGNC Symbol;Acc:HGNC:14615]	Paralogs	protein_coding	Some exons
CNVR_5914	16	59299715	59301382	1668	DEL	ENSBTAG00000018303	PAPPA2	pappalysin 2 [Source:HGNC Symbol;Acc:HGNC:14615]	Paralogs	protein_coding	Intron
CNVR_5915	16	59300066	59301382	1317	DEL	ENSBTAG00000018303	PAPPA2	pappalysin 2 [Source:HGNC Symbol;Acc:HGNC:14615]	Paralogs	protein_coding	Intron
CNVR_5928	16	61638155	61639420	1266	DEL	ENSBTAG00000010718	RALGPS2	Ral GEF with PH domain and SH3 binding motif 2 [Source:HGNC Symbol;Acc:HGNC:30279]	Paralogs	protein_coding	Intron
CNVR_5930	16	62197030	62198005	976	DEL	ENSBTAG00000002164	AXDND1	axonemal dynein light chain domain containing 1 [Source:HGNC Symbol;Acc:HGNC:26564]	No_Paralogs	protein_coding	Intron
CNVR_5957	16	65098839	65101123	2285	DEL	ENSBTAG00000009091	RNASEL	ribonuclease L [Source:HGNC Symbol;Acc:HGNC:10050]	Paralogs	protein_coding	Some exons
CNVR_5962	16	67010101	67012890	2790	DEL	ENSBTAG00000038079			Paralogs	protein_coding	Intron
CNVR_5966	16	67775870	67776390	521	DEL	ENSBTAG00000014249	IVNS1ABP	influenza virus NS1A binding protein [Source:HGNC Symbol;Acc:HGNC:16951]	Paralogs	protein_coding	Intron
CNVR_5971	16	68477614	68479146	1533	DEL	ENSBTAG00000015235		hemicentin-1 precursor [Source:RefSeq peptide;Acc:NP_001179466]	Paralogs	protein_coding	Intron
CNVR_6020	16	75594001	75595524	1524	DEL	ENSBTAG00000016542	LAMB3	laminin subunit beta 3 [Source:HGNC Symbol;Acc:HGNC:6490]	Paralogs	protein_coding	Intron
CNVR_6039	16	78290717	78302694	11978	DEL	ENSBTAG00000008944	CRB1	crumbs 1, cell polarity complex component [Source:HGNC Symbol;Acc:HGNC:2343]	Paralogs	protein_coding	Intron
CNVR_6069	16	81147294	81148529	1236	DEL	ENSBTAG00000021874	KIF14	kinesin family member 14 [Source:HGNC Symbol;Acc:HGNC:19181]	Paralogs	protein_coding	Some exons
CNVR_6113	17	4858991	4859405	415	DEL	ENSBTAG00000008438	ARFIP1	ADP ribosylation factor interacting protein 1 [Source:HGNC Symbol;Acc:HGNC:21496]	Paralogs	protein_coding	Intron
CNVR_6128	17	6992401	6995281	2881	DEL	ENSBTAG00000018546	LRBA	LPS responsive beige-like anchor protein [Source:HGNC Symbol;Acc:HGNC:1742]	Paralogs	protein_coding	Some exons
CNVR_6132	17	7271546	7272173	628	DEL	ENSBTAG00000018546	LRBA	LPS responsive beige-like anchor protein [Source:HGNC Symbol;Acc:HGNC:1742]	Paralogs	protein_coding	Intron
CNVR_6147	17	9662560	9732439	69880	DEL	ENSBTAG00000042563	U6	U6 spliceosomal RNA [Source:RFAM;Acc:RF00026]	Paralogs	snRNA	Some exons
CNVR_6159	17	12026001	12030750	4750	DEL	ENSBTAG00000034522	SLC10A7		Paralogs	protein_coding	Intron
CNVR_6167	17	14199251	14234519	35269	CNV	ENSBTAG00000039325			Paralogs	protein_coding	Some exons
CNVR_6170	17	14208990	14407914	198925	CNV	ENSBTAG00000039325			Paralogs	protein_coding	Entire gene
CNVR_6170	17	14208990	14407914	198925	CNV	ENSBTAG00000047331			Paralogs	protein_coding	Entire gene
CNVR_6171	17	14212142	14235833	23692	DEL	ENSBTAG00000039325			Paralogs	protein_coding	Some exons
CNVR_6173	17	14214211	14236934	22724	CNV	ENSBTAG00000039325			Paralogs	protein_coding	Some exons
CNVR_6192	17	16003654	16005482	1829	DEL	ENSBTAG00000014111	INPP4B	inositol polyphosphate-4-phosphatase type II B [Source:HGNC Symbol;Acc:HGNC:6075]	Paralogs	protein_coding	Intron
CNVR_6200	17	18758975	18762500	3526	DEL	ENSBTAG00000015811			Paralogs	protein_coding	Entire gene
CNVR_6224	17	21231008	24003035	2772028	DEL	ENSBTAG00000023895			No_Paralogs	pseudogene	Entire gene
CNVR_6224	17	21231008	24003035	2772028	DEL	ENSBTAG00000033967			Paralogs	protein_coding	Entire gene
CNVR_6224	17	21231008	24003035	2772028	DEL	ENSBTAG00000042760	U6	U6 spliceosomal RNA [Source:RFAM;Acc:RF00026]	Paralogs	snRNA	Entire gene
CNVR_6224	17	21231008	24003035	2772028	DEL	ENSBTAG00000043885	7SK	7SK RNA [Source:RFAM;Acc:RF00100]	Paralogs	misc_RNA	Entire gene
CNVR_6224	17	21231008	24003035	2772028	DEL	ENSBTAG00000044703	SNORA25	Small nucleolar RNA SNORA25 [Source:RFAM;Acc:RF00402]	Paralogs	snoRNA	Entire gene
CNVR_6224	17	21231008	24003035	2772028	DEL	ENSBTAG00000045176	U6	U6 spliceosomal RNA [Source:RFAM;Acc:RF00026]	Paralogs	snRNA	Entire gene
CNVR_6261	17	24954123	25543114	588992	DEL	ENSBTAG00000019977	PCDH10		Paralogs	protein_coding	Entire gene
CNVR_6261	17	24954123	25543114	588992	DEL	ENSBTAG00000035012			Paralogs	protein_coding	Entire gene
CNVR_6261	17	24954123	25543114	588992	DEL	ENSBTAG00000036321			No_Paralogs	pseudogene	Entire gene
CNVR_6261	17	24954123	25543114	588992	DEL	ENSBTAG00000040370			Paralogs	protein_coding	Entire gene
CNVR_6261	17	24954123	25543114	588992	DEL	ENSBTAG00000046669	PRAME	preferentially expressed antigen in melanoma [Source:RefSeq peptide;Acc:NP_001071447]	Paralogs	protein_coding	Entire gene
CNVR_6289	17	27154061	27155005	945	DEL	ENSBTAG00000045079	U2	U2 spliceosomal RNA [Source:RFAM;Acc:RF00004]	Paralogs	snRNA	Entire gene
CNVR_6349	17	32755741	32757396	1656	DEL	ENSBTAG00000003345	FAT4	FAT atypical cadherin 4 [Source:HGNC Symbol;Acc:HGNC:23109]	Paralogs	protein_coding	Intron
CNVR_6366	17	35060147	35061364	1218	DEL	ENSBTAG00000000125	SPATA5	spermatogenesis associated 5 [Source:HGNC Symbol;Acc:HGNC:18119]	No_Paralogs	protein_coding	Intron
CNVR_6413	17	39871001	39887250	16250	DEL	ENSBTAG00000026437	ULBP3	UL16 binding protein 3 precursor [Source:RefSeq peptide;Acc:NP_001096703]	Paralogs	protein_coding	Entire gene
CNVR_6472	17	45211353	45212601	1249	DEL	ENSBTAG00000040336	ZNF577		Paralogs	protein_coding	Intron
CNVR_6483	17	47732899	47734087	1189	DEL	ENSBTAG00000006468	PIWIL1	piwi-like protein 1 [Source:RefSeq peptide;Acc:NP_001302505]	Paralogs	protein_coding	Intron
CNVR_6493	17	49598016	49602000	3985	DEL	ENSBTAG00000046256	TMEM132C	transmembrane protein 132C [Source:HGNC Symbol;Acc:HGNC:25436]	Paralogs	protein_coding	Intron
CNVR_6494	17	49638846	49640083	1238	DEL	ENSBTAG00000046256	TMEM132C	transmembrane protein 132C [Source:HGNC Symbol;Acc:HGNC:25436]	Paralogs	protein_coding	Intron
CNVR_6496	17	50580306	51718233	1137928	CNV	ENSBTAG00000020532			Paralogs	protein_coding	Entire gene
CNVR_6496	17	50580306	51718233	1137928	CNV	ENSBTAG00000033558			Paralogs	protein_coding	Entire gene
CNVR_6496	17	50580306	51718233	1137928	CNV	ENSBTAG00000034761			Paralogs	protein_coding	Entire gene
CNVR_6496	17	50580306	51718233	1137928	CNV	ENSBTAG00000039769			Paralogs	protein_coding	Entire gene
CNVR_6496	17	50580306	51718233	1137928	CNV	ENSBTAG00000046306			Paralogs	protein_coding	Entire gene
CNVR_6496	17	50580306	51718233	1137928	CNV	ENSBTAG00000046439			Paralogs	protein_coding	Entire gene
CNVR_6496	17	50580306	51718233	1137928	CNV	ENSBTAG00000046657			Paralogs	protein_coding	Entire gene
CNVR_6496	17	50580306	51718233	1137928	CNV	ENSBTAG00000047085	PRAME	Bos taurus preferentially expressed antigen in melanoma	Paralogs	protein_coding	Entire gene
CNVR_6496	17	50580306	51718233	1137928	CNV	ENSBTAG00000047597			Paralogs	protein_coding	Entire gene
CNVR_6497	17	50610906	50836379	225474	CNV	ENSBTAG00000046439			Paralogs	protein_coding	Entire gene
CNVR_6512	17	51605251	51667750	62500	CNV	ENSBTAG00000034761			Paralogs	protein_coding	Entire gene
CNVR_6522	17	52637649	52639520	1872	DEL	ENSBTAG00000006626	TMEM132B	transmembrane protein 132B [Source:HGNC Symbol;Acc:HGNC:29397]	Paralogs	protein_coding	Intron
CNVR_6541	17	57596483	57650196	53714	DEL	ENSBTAG00000001164	ACAD10	acyl-CoA dehydrogenase family member 10 [Source:HGNC Symbol;Acc:HGNC:21597]	Paralogs	protein_coding	Some exons
CNVR_6589	17	70642482	70643250	769	DEL	ENSBTAG00000017738	EMID1	EMI domain-containing protein 1 isoform 2 precursor [Source:RefSeq peptide;Acc:NP_001265583]	Paralogs	protein_coding	Some exons
CNVR_11771	27	23713902	26384172	2670271	DUP	ENSBTAG00000007051	CLDN23	claudin 23 [Source:HGNC Symbol;Acc:HGNC:17591]	No_Paralogs	protein_coding	Entire gene
CNVR_6607	17	72818788	72930925	112138	DEL	ENSBTAG00000031160			Paralogs	protein_coding	Some exons
CNVR_6607	17	72818788	72930925	112138	DEL	ENSBTAG00000039237			Paralogs	protein_coding	Entire gene
CNVR_6607	17	72818788	72930925	112138	DEL	ENSBTAG00000045810			No_Paralogs	pseudogene	Entire gene
CNVR_6607	17	72818788	72930925	112138	DEL	ENSBTAG00000047529			Paralogs	protein_coding	Entire gene
CNVR_6607	17	72818788	72930925	112138	DEL	ENSBTAG00000047986			Paralogs	protein_coding	Entire gene
CNVR_6609	17	72840078	72840791	714	DEL	ENSBTAG00000031160			Paralogs	protein_coding	Intron
CNVR_6614	17	72860964	72874857	13894	DEL	ENSBTAG00000039237			Paralogs	protein_coding	Entire gene
CNVR_6614	17	72860964	72874857	13894	DEL	ENSBTAG00000031160			Paralogs	protein_coding	Intron
CNVR_6618	17	72924500	72960714	36215	DEL	ENSBTAG00000031160			Paralogs	protein_coding	Intron
CNVR_6621	17	73026450	73027413	964	DEL	ENSBTAG00000031160			Paralogs	protein_coding	Intron
CNVR_6659	18	1554242	1554760	519	DEL	ENSBTAG00000009357	IL34	interleukin 34 [Source:HGNC Symbol;Acc:HGNC:28529]	No_Paralogs	protein_coding	Intron
CNVR_9625	22	5856609	7696206	1839598	DEL	ENSBTAG00000001712	CMTM7	CKLF like MARVEL transmembrane domain containing 7 [Source:HGNC Symbol;Acc:HGNC:19178]	No_Paralogs	protein_coding	Entire gene
CNVR_6682	18	5542258	5542844	587	DEL	ENSBTAG00000015894	WWOX	WW domain containing oxidoreductase [Source:HGNC Symbol;Acc:HGNC:12799]	Paralogs	protein_coding	Intron
CNVR_6694	18	7449451	7451561	2111	DEL	ENSBTAG00000017112	CDYL2	chromodomain Y-like protein 2 [Source:RefSeq peptide;Acc:NP_001157257]	Paralogs	protein_coding	Intron
CNVR_6704	18	10059501	10060939	1439	DEL	ENSBTAG00000034373	CDH13	cadherin-13 precursor [Source:RefSeq peptide;Acc:NP_001030354]	Paralogs	protein_coding	Intron
CNVR_6705	18	10107581	10108882	1302	DEL	ENSBTAG00000034373	CDH13	cadherin-13 precursor [Source:RefSeq peptide;Acc:NP_001030354]	Paralogs	protein_coding	Intron
CNVR_6709	18	10677576	10678564	989	DEL	ENSBTAG00000000945	ATP2C2	ATPase secretory pathway Ca2+ transporting 2 [Source:HGNC Symbol;Acc:HGNC:29103]	Paralogs	protein_coding	Intron
CNVR_6710	18	10685501	10686620	1120	DEL	ENSBTAG00000000945	ATP2C2	ATPase secretory pathway Ca2+ transporting 2 [Source:HGNC Symbol;Acc:HGNC:29103]	Paralogs	protein_coding	Some exons
CNVR_6730	18	15506516	21364612	5858097	DEL	ENSBTAG00000033078	CNEP1R1	CTD nuclear envelope phosphatase 1 regulatory subunit 1 [Source:HGNC Symbol;Acc:HGNC:26759]	No_Paralogs	protein_coding	Entire gene
CNVR_6716	18	13361001	13441037	80037	DUP	ENSBTAG00000010151	CA5A	carbonic anhydrase 5A [Source:HGNC Symbol;Acc:HGNC:1377]	Paralogs	protein_coding	Entire gene
CNVR_6716	18	13361001	13441037	80037	DUP	ENSBTAG00000006731	SLC7A5	solute carrier family 7 member 5 [Source:HGNC Symbol;Acc:HGNC:11063]	Paralogs	protein_coding	5' UTR
CNVR_6730	18	15506516	21364612	5858097	DEL	ENSBTAG00000000418	TOX3	TOX high mobility group box family member 3 [Source:HGNC Symbol;Acc:HGNC:11972]	Paralogs	protein_coding	Entire gene
CNVR_9625	22	5856609	7696206	1839598	DEL	ENSBTAG00000004834	CNOT10	CCR4-NOT transcription complex subunit 10 [Source:HGNC Symbol;Acc:HGNC:23817]	No_Paralogs	protein_coding	Entire gene
CNVR_14285	4	78072737	78495509	422773	DEL	ENSBTAG00000012968	COA1	cytochrome c oxidase assembly factor 1 homolog [Source:HGNC Symbol;Acc:HGNC:21868]	No_Paralogs	protein_coding	Entire gene
CNVR_6730	18	15506516	21364612	5858097	DEL	ENSBTAG00000004806	PHKB	phosphorylase kinase regulatory subunit beta [Source:HGNC Symbol;Acc:HGNC:8927]	Paralogs	protein_coding	Entire gene
CNVR_6730	18	15506516	21364612	5858097	DEL	ENSBTAG00000005535			No_Paralogs	pseudogene	Entire gene
CNVR_6730	18	15506516	21364612	5858097	DEL	ENSBTAG00000006208	ADCY7	adenylate cyclase 7 [Source:HGNC Symbol;Acc:HGNC:238]	Paralogs	protein_coding	Entire gene
CNVR_1242	1	154241425	154253314	11890	DEL	ENSBTAG00000040193	COLQ	collagen like tail subunit of asymmetric acetylcholinesterase [Source:HGNC Symbol;Acc:HGNC:2226]	No_Paralogs	protein_coding	Some exons
CNVR_6730	18	15506516	21364612	5858097	DEL	ENSBTAG00000007942	PAPD5		Paralogs	protein_coding	Entire gene
CNVR_6730	18	15506516	21364612	5858097	DEL	ENSBTAG00000008544	SALL1	spalt like transcription factor 1 [Source:HGNC Symbol;Acc:HGNC:10524]	Paralogs	protein_coding	Entire gene
CNVR_2196	11	27849112	31324038	3474927	DEL	ENSBTAG00000015723	CRIPT	CXXC repeat containing interactor of PDZ3 domain [Source:HGNC Symbol;Acc:HGNC:14312]	No_Paralogs	protein_coding	Entire gene
CNVR_6730	18	15506516	21364612	5858097	DEL	ENSBTAG00000010858	ABCC11	ATP binding cassette subfamily C member 11 [Source:HGNC Symbol;Acc:HGNC:14639]	Paralogs	protein_coding	Entire gene
CNVR_6730	18	15506516	21364612	5858097	DEL	ENSBTAG00000010867	LONP2	lon peptidase 2, peroxisomal [Source:HGNC Symbol;Acc:HGNC:20598]	Paralogs	protein_coding	Entire gene
CNVR_6730	18	15506516	21364612	5858097	DEL	ENSBTAG00000010868	SIAH1	siah E3 ubiquitin protein ligase 1 [Source:HGNC Symbol;Acc:HGNC:10857]	Paralogs	protein_coding	Entire gene
CNVR_6730	18	15506516	21364612	5858097	DEL	ENSBTAG00000012295	NKD1	naked cuticle homolog 1 [Source:HGNC Symbol;Acc:HGNC:17045]	Paralogs	protein_coding	Entire gene
CNVR_6730	18	15506516	21364612	5858097	DEL	ENSBTAG00000014370	NETO2	neuropilin and tolloid like 2 [Source:HGNC Symbol;Acc:HGNC:14644]	Paralogs	protein_coding	Entire gene
CNVR_6730	18	15506516	21364612	5858097	DEL	ENSBTAG00000015194	CBLN1	cerebellin 1 precursor [Source:HGNC Symbol;Acc:HGNC:1543]	Paralogs	protein_coding	Entire gene
CNVR_12856	29	50364849	50394761	29913	DUP	ENSBTAG00000020242	CRLF2	cytokine receptor-like factor 2 [Source:HGNC Symbol;Acc:HGNC:14281]	No_Paralogs	protein_coding	Entire gene
CNVR_6730	18	15506516	21364612	5858097	DEL	ENSBTAG00000017397	ZNF423	zinc finger protein 423 [Source:HGNC Symbol;Acc:HGNC:16762]	Paralogs	protein_coding	Entire gene
CNVR_6730	18	15506516	21364612	5858097	DEL	ENSBTAG00000019938	N4BP1	NEDD4-binding protein 1 [Source:RefSeq peptide;Acc:NP_001178362]	Paralogs	protein_coding	Entire gene
CNVR_6730	18	15506516	21364612	5858097	DEL	ENSBTAG00000020936	NOD2	Nucleotide-binding oligomerization domain-containing protein 2 [Source:UniProtKB/Swiss-Prot;Acc:Q6E804]	Paralogs	protein_coding	Entire gene
CNVR_6730	18	15506516	21364612	5858097	DEL	ENSBTAG00000021575	BRD7	bromodomain containing 7 [Source:HGNC Symbol;Acc:HGNC:14310]	Paralogs	protein_coding	Entire gene
CNVR_6730	18	15506516	21364612	5858097	DEL	ENSBTAG00000028470	5S_rRNA	5S ribosomal RNA [Source:RFAM;Acc:RF00001]	Paralogs	rRNA	Entire gene
CNVR_4568	14	62869204	63401279	532076	DEL	ENSBTAG00000032591	CTHRC1	collagen triple helix repeat containing 1 [Source:HGNC Symbol;Acc:HGNC:18831]	No_Paralogs	protein_coding	Entire gene
CNVR_6730	18	15506516	21364612	5858097	DEL	ENSBTAG00000039104			No_Paralogs	miRNA	Entire gene
CNVR_6730	18	15506516	21364612	5858097	DEL	ENSBTAG00000040550	NKX6-2		Paralogs	protein_coding	Entire gene
CNVR_6730	18	15506516	21364612	5858097	DEL	ENSBTAG00000042102	U6	U6 spliceosomal RNA [Source:RFAM;Acc:RF00026]	Paralogs	snRNA	Entire gene
CNVR_6730	18	15506516	21364612	5858097	DEL	ENSBTAG00000042433	snoU2_19	Small nucleolar RNA U2-19 [Source:RFAM;Acc:RF00494]	Paralogs	snoRNA	Entire gene
CNVR_6730	18	15506516	21364612	5858097	DEL	ENSBTAG00000042439	snoU2-30	Small nucleolar RNA U2-30 [Source:RFAM;Acc:RF00493]	Paralogs	snoRNA	Entire gene
CNVR_6730	18	15506516	21364612	5858097	DEL	ENSBTAG00000044191		ATP binding cassette subfamily C member 12 [Source:HGNC Symbol;Acc:HGNC:14640]	Paralogs	protein_coding	Entire gene
CNVR_6730	18	15506516	21364612	5858097	DEL	ENSBTAG00000044597	5S_rRNA	5S ribosomal RNA [Source:RFAM;Acc:RF00001]	Paralogs	rRNA	Entire gene
CNVR_6730	18	15506516	21364612	5858097	DEL	ENSBTAG00000045104	snoU13	Small nucleolar RNA U13 [Source:RFAM;Acc:RF01210]	Paralogs	snoRNA	Entire gene
CNVR_6732	18	15543692	15545500	1809	DEL	ENSBTAG00000014370	NETO2	neuropilin and tolloid like 2 [Source:HGNC Symbol;Acc:HGNC:14644]	Paralogs	protein_coding	Intron
CNVR_6778	18	25224434	25225602	1169	DEL	ENSBTAG00000002233	CPNE2	copine-2 [Source:RefSeq peptide;Acc:NP_001230260]	Paralogs	protein_coding	Some exons
CNVR_6781	18	26177174	26217953	40780	DEL	ENSBTAG00000014144	CCDC113	coiled-coil domain containing 113 [Source:HGNC Symbol;Acc:HGNC:25002]	No_Paralogs	protein_coding	3' UTR
CNVR_6781	18	26177174	26217953	40780	DEL	ENSBTAG00000014147	PRSS54	protease, serine 54 [Source:HGNC Symbol;Acc:HGNC:26336]	Paralogs	protein_coding	Entire gene
CNVR_6782	18	26177235	26178796	1562	DEL	ENSBTAG00000014144	CCDC113	coiled-coil domain containing 113 [Source:HGNC Symbol;Acc:HGNC:25002]	No_Paralogs	protein_coding	Intron
CNVR_6858	18	34444142	34446479	2338	DEL	ENSBTAG00000032576	CMTM2	CKLF like MARVEL transmembrane domain containing 2 [Source:HGNC Symbol;Acc:HGNC:19173]	No_Paralogs	protein_coding	Intron
CNVR_6888	18	44052586	44053548	963	DEL	ENSBTAG00000031941	PEPD	peptidase D [Source:HGNC Symbol;Acc:HGNC:8840]	No_Paralogs	protein_coding	Intron
CNVR_6896	18	45370439	45418638	48200	DEL	ENSBTAG00000045778	U6	U6 spliceosomal RNA [Source:RFAM;Acc:RF00026]	Paralogs	snRNA	Entire gene
CNVR_6914	18	47103782	47107531	3750	DEL	ENSBTAG00000002398	ZNF567	zinc finger protein 567 [Source:HGNC Symbol;Acc:HGNC:28696]	Paralogs	protein_coding	Intron
CNVR_6920	18	47623850	47626304	2455	DEL	ENSBTAG00000004939		zinc finger protein 569 [Source:HGNC Symbol;Acc:HGNC:24737]	Paralogs	protein_coding	Intron
CNVR_6922	18	47759021	47759911	891	DEL	ENSBTAG00000008902			Paralogs	protein_coding	Intron
CNVR_6933	18	50006078	50006942	865	DEL	ENSBTAG00000040067	HIPK4	homeodomain interacting protein kinase 4 [Source:HGNC Symbol;Acc:HGNC:19007]	Paralogs	protein_coding	Some exons
CNVR_6968	18	51747694	51775750	28057	DEL	ENSBTAG00000006859			Paralogs	protein_coding	Some exons
CNVR_6969	18	51755167	51780739	25573	CNV	ENSBTAG00000006859			Paralogs	protein_coding	Some exons
CNVR_6980	18	53351501	53376500	25000	DEL	ENSBTAG00000002682	MARK4	microtubule affinity regulating kinase 4 [Source:HGNC Symbol;Acc:HGNC:13538]	Paralogs	protein_coding	Some exons
CNVR_6991	18	57651737	57731735	79999	DEL	ENSBTAG00000038024	SIGLECL1	SIGLEC family like 1 [Source:HGNC Symbol;Acc:HGNC:26856]	Paralogs	protein_coding	Some exons
CNVR_6991	18	57651737	57731735	79999	DEL	ENSBTAG00000037699			Paralogs	protein_coding	3' UTR
CNVR_7024	18	59163599	59367219	203621	DEL	ENSBTAG00000037440			Paralogs	protein_coding	Entire gene
CNVR_7024	18	59163599	59367219	203621	DEL	ENSBTAG00000045571	CDK4		Paralogs	protein_coding	Entire gene
CNVR_7024	18	59163599	59367219	203621	DEL	ENSBTAG00000047712			No_Paralogs	processed_pseudogene	Entire gene
CNVR_7034	18	59684042	59983585	299544	DEL	ENSBTAG00000015899			Paralogs	protein_coding	Entire gene
CNVR_7034	18	59684042	59983585	299544	DEL	ENSBTAG00000021433			Paralogs	protein_coding	Entire gene
CNVR_7034	18	59684042	59983585	299544	DEL	ENSBTAG00000040411			Paralogs	protein_coding	Entire gene
CNVR_7047	18	60070310	60071078	769	DEL	ENSBTAG00000011844			Paralogs	protein_coding	Some exons
CNVR_7075	18	60870598	60974512	103915	DEL	ENSBTAG00000038755			Paralogs	protein_coding	Some exons
CNVR_7075	18	60870598	60974512	103915	DEL	ENSBTAG00000045581			Paralogs	protein_coding	5' UTR
CNVR_7082	18	61232270	61302688	70419	DEL	ENSBTAG00000046961			Paralogs	protein_coding	Entire gene
CNVR_7089	18	61323001	61324682	1682	DEL	ENSBTAG00000036224		uncharacterized protein LOC788038 [Source:RefSeq peptide;Acc:NP_001095817]	Paralogs	protein_coding	Intron
CNVR_7090	18	61323052	61403495	80444	DEL	ENSBTAG00000036224		uncharacterized protein LOC788038 [Source:RefSeq peptide;Acc:NP_001095817]	Paralogs	protein_coding	3' UTR
CNVR_7090	18	61323052	61403495	80444	DEL	ENSBTAG00000014953			Paralogs	protein_coding	Entire gene
CNVR_7091	18	61324362	61341144	16783	DEL	ENSBTAG00000036224		uncharacterized protein LOC788038 [Source:RefSeq peptide;Acc:NP_001095817]	Paralogs	protein_coding	Some exons
CNVR_7094	18	61405375	61754952	349578	DEL	ENSBTAG00000002290			Paralogs	protein_coding	Entire gene
CNVR_7094	18	61405375	61754952	349578	DEL	ENSBTAG00000009171			Paralogs	protein_coding	Entire gene
CNVR_7094	18	61405375	61754952	349578	DEL	ENSBTAG00000009364			Paralogs	protein_coding	Entire gene
CNVR_7094	18	61405375	61754952	349578	DEL	ENSBTAG00000014328			Paralogs	protein_coding	Entire gene
CNVR_7094	18	61405375	61754952	349578	DEL	ENSBTAG00000047602			Paralogs	protein_coding	Entire gene
CNVR_7103	18	61648574	61844986	196413	DEL	ENSBTAG00000002290			Paralogs	protein_coding	Entire gene
CNVR_7103	18	61648574	61844986	196413	DEL	ENSBTAG00000009364			Paralogs	protein_coding	Entire gene
CNVR_7103	18	61648574	61844986	196413	DEL	ENSBTAG00000013345			Paralogs	protein_coding	Entire gene
CNVR_7119	18	62928995	62930500	1506	DEL	ENSBTAG00000047953			Paralogs	protein_coding	Intron
CNVR_7133	18	63632094	63632962	869	DEL	ENSBTAG00000006961	NLRP13	NLR family pyrin domain containing 13 [Source:HGNC Symbol;Acc:HGNC:22937]	Paralogs	protein_coding	Intron
CNVR_7134	18	63633274	63635612	2339	DEL	ENSBTAG00000006961	NLRP13	NLR family pyrin domain containing 13 [Source:HGNC Symbol;Acc:HGNC:22937]	Paralogs	protein_coding	Some exons
CNVR_7139	18	63758100	63786028	27929	DEL	ENSBTAG00000024895			Paralogs	protein_coding	Entire gene
CNVR_7139	18	63758100	63786028	27929	DEL	ENSBTAG00000045803			Paralogs	protein_coding	Entire gene
CNVR_7139	18	63758100	63786028	27929	DEL	ENSBTAG00000046087			Paralogs	protein_coding	Entire gene
CNVR_7143	18	63783656	63799154	15499	DEL	ENSBTAG00000047236			Paralogs	protein_coding	Entire gene
CNVR_7144	18	63787130	63817062	29933	CNV	ENSBTAG00000000688			Paralogs	protein_coding	Entire gene
CNVR_7144	18	63787130	63817062	29933	CNV	ENSBTAG00000030344			Paralogs	protein_coding	Entire gene
CNVR_7144	18	63787130	63817062	29933	CNV	ENSBTAG00000047236			Paralogs	protein_coding	Entire gene
CNVR_7154	18	64060146	64062700	2555	DEL	ENSBTAG00000002055	ZFP28	ZFP28 zinc finger protein [Source:HGNC Symbol;Acc:HGNC:17801]	Paralogs	protein_coding	Intron
CNVR_7158	18	64589810	64622141	32332	DEL	ENSBTAG00000038926			Paralogs	protein_coding	Some exons
CNVR_7158	18	64589810	64622141	32332	DEL	ENSBTAG00000003261		aurora kinase C [Source:HGNC Symbol;Acc:HGNC:11391]	Paralogs	protein_coding	Entire gene
CNVR_7165	18	65292632	65294595	1964	DEL	ENSBTAG00000003447	ZNF551	zinc finger protein 551 [Source:HGNC Symbol;Acc:HGNC:25108]	Paralogs	protein_coding	Some exons
CNVR_7191	19	1259171	1260328	1158	DEL	ENSBTAG00000034681	CA10	carbonic anhydrase 10 [Source:HGNC Symbol;Acc:HGNC:1369]	Paralogs	protein_coding	Intron
CNVR_7224	19	2984783	4317779	1332997	DEL	ENSBTAG00000010674			Paralogs	protein_coding	Entire gene
CNVR_7224	19	2984783	4317779	1332997	DEL	ENSBTAG00000017345	KIF2B	kinesin family member 2B [Source:HGNC Symbol;Acc:HGNC:29443]	Paralogs	protein_coding	Entire gene
CNVR_7224	19	2984783	4317779	1332997	DEL	ENSBTAG00000036115			Paralogs	protein_coding	Entire gene
CNVR_7224	19	2984783	4317779	1332997	DEL	ENSBTAG00000044618	SNORA31	Small nucleolar RNA SNORA31 [Source:RFAM;Acc:RF00322]	Paralogs	snoRNA	Entire gene
CNVR_7236	19	3947501	3979500	32000	DEL	ENSBTAG00000036115			Paralogs	protein_coding	Some exons
CNVR_7252	19	5413688	5483400	69713	DEL	ENSBTAG00000016078		syntaxin-binding protein 4 [Source:RefSeq peptide;Acc:NP_001179856]	Paralogs	protein_coding	Some exons
CNVR_7252	19	5413688	5483400	69713	DEL	ENSBTAG00000043089	U6	U6 spliceosomal RNA [Source:RFAM;Acc:RF00026]	Paralogs	snRNA	Entire gene
CNVR_7254	19	6253671	6422445	168775	DEL	ENSBTAG00000038770			Paralogs	protein_coding	Entire gene
CNVR_7254	19	6253671	6422445	168775	DEL	ENSBTAG00000039563			Paralogs	protein_coding	Entire gene
CNVR_7254	19	6253671	6422445	168775	DEL	ENSBTAG00000040237			Paralogs	protein_coding	Entire gene
CNVR_7254	19	6253671	6422445	168775	DEL	ENSBTAG00000042227	SNORD33	Small nucleolar RNA Z195/SNORD33/SNORD32 family [Source:RFAM;Acc:RF00133]	Paralogs	snoRNA	Entire gene
CNVR_7254	19	6253671	6422445	168775	DEL	ENSBTAG00000042962	SNORD33	Small nucleolar RNA Z195/SNORD33/SNORD32 family [Source:RFAM;Acc:RF00133]	Paralogs	snoRNA	Entire gene
CNVR_7254	19	6253671	6422445	168775	DEL	ENSBTAG00000047859	SNORD33	Small nucleolar RNA Z195/SNORD33/SNORD32 family [Source:RFAM;Acc:RF00133]	Paralogs	snoRNA	Entire gene
CNVR_7281	19	13018166	13018826	661	DEL	ENSBTAG00000020089	USP32	ubiquitin specific peptidase 32 [Source:HGNC Symbol;Acc:HGNC:19143]	Paralogs	protein_coding	Intron
CNVR_7293	19	15259773	15260500	728	DEL	ENSBTAG00000002898	UNC45B	unc-45 myosin chaperone B [Source:HGNC Symbol;Acc:HGNC:14304]	Paralogs	protein_coding	Intron
CNVR_7298	19	16460501	16464000	3500	DEL	ENSBTAG00000025200	ASIC2	acid-sensing ion channel 2 [Source:RefSeq peptide;Acc:NP_001069952]	Paralogs	protein_coding	Intron
CNVR_7303	19	16753989	16755676	1688	DEL	ENSBTAG00000025200	ASIC2	acid-sensing ion channel 2 [Source:RefSeq peptide;Acc:NP_001069952]	Paralogs	protein_coding	Intron
CNVR_7306	19	17046553	17047155	603	DEL	ENSBTAG00000025200	ASIC2	acid-sensing ion channel 2 [Source:RefSeq peptide;Acc:NP_001069952]	Paralogs	protein_coding	Intron
CNVR_7309	19	17729241	17730345	1105	DEL	ENSBTAG00000015527	MYO1D	myosin ID [Source:HGNC Symbol;Acc:HGNC:7598]	Paralogs	protein_coding	Intron
CNVR_7312	19	18278758	18279445	688	DEL	ENSBTAG00000010001	RHOT1	ras homolog family member T1 [Source:HGNC Symbol;Acc:HGNC:21168]	Paralogs	protein_coding	Intron
CNVR_7343	19	22526947	22527946	1000	DEL	ENSBTAG00000000855	NXN	nucleoredoxin [Source:HGNC Symbol;Acc:HGNC:18008]	Paralogs	protein_coding	Intron
CNVR_7367	19	24755106	24761874	6769	DEL	ENSBTAG00000047458			Paralogs	protein_coding	Entire gene
CNVR_7399	19	35080319	35081193	875	DEL	ENSBTAG00000006520	MYO15A	myosin XVA [Source:HGNC Symbol;Acc:HGNC:7594]	Paralogs	protein_coding	Some exons
CNVR_7408	19	37214111	37214876	766	DEL	ENSBTAG00000019498	ITGA3	Integrin alpha-3 Integrin alpha-3 heavy chain Integrin alpha-3 light chain [Source:UniProtKB/Swiss-Prot;Acc:F1MMS9]	Paralogs	protein_coding	Intron
CNVR_7445	19	43877113	43902008	24896	DEL	ENSBTAG00000030306	U2	U2 spliceosomal RNA [Source:RFAM;Acc:RF00004]	Paralogs	snRNA	Entire gene
CNVR_7445	19	43877113	43902008	24896	DEL	ENSBTAG00000045916	U2	U2 spliceosomal RNA [Source:RFAM;Acc:RF00004]	Paralogs	snRNA	Entire gene
CNVR_7445	19	43877113	43902008	24896	DEL	ENSBTAG00000048183	U2	U2 spliceosomal RNA [Source:RFAM;Acc:RF00004]	Paralogs	snRNA	Entire gene
CNVR_7473	19	47111185	47138790	27606	DEL	ENSBTAG00000045837			Paralogs	protein_coding	Entire gene
CNVR_7486	19	48862856	48896620	33765	DEL	ENSBTAG00000019432	ICAM2	intercellular adhesion molecule 2 [Source:HGNC Symbol;Acc:HGNC:5345]	Paralogs	protein_coding	5' UTR
CNVR_7498	19	50861101	51059740	198640	CNV	ENSBTAG00000024915			Paralogs	protein_coding	Entire gene
CNVR_7498	19	50861101	51059740	198640	CNV	ENSBTAG00000024934			Paralogs	protein_coding	Entire gene
CNVR_7498	19	50861101	51059740	198640	CNV	ENSBTAG00000038910			Paralogs	protein_coding	Entire gene
CNVR_7498	19	50861101	51059740	198640	CNV	ENSBTAG00000039765			Paralogs	protein_coding	Entire gene
CNVR_7498	19	50861101	51059740	198640	CNV	ENSBTAG00000044288	bta-mir-2345	bta-mir-2345 [Source:miRBase;Acc:MI0011373]	No_Paralogs	miRNA	Entire gene
CNVR_7498	19	50861101	51059740	198640	CNV	ENSBTAG00000045084	bta-mir-2345	bta-mir-2345 [Source:miRBase;Acc:MI0011373]	No_Paralogs	miRNA	Entire gene
CNVR_7498	19	50861101	51059740	198640	CNV	ENSBTAG00000045277	bta-mir-2345	bta-mir-2345 [Source:miRBase;Acc:MI0011373]	No_Paralogs	miRNA	Entire gene
CNVR_7498	19	50861101	51059740	198640	CNV	ENSBTAG00000047245			No_Paralogs	miRNA	Entire gene
CNVR_7502	19	50897682	50940635	42954	CNV	ENSBTAG00000024934			Paralogs	protein_coding	Entire gene
CNVR_7502	19	50897682	50940635	42954	CNV	ENSBTAG00000044288	bta-mir-2345	bta-mir-2345 [Source:miRBase;Acc:MI0011373]	No_Paralogs	miRNA	Entire gene
CNVR_7510	19	51052674	51140179	87506	DEL	ENSBTAG00000040323			Paralogs	protein_coding	Some exons
CNVR_7510	19	51052674	51140179	87506	DEL	ENSBTAG00000045705			No_Paralogs	pseudogene	Entire gene
CNVR_7510	19	51052674	51140179	87506	DEL	ENSBTAG00000046226			No_Paralogs	miRNA	Entire gene
CNVR_7511	19	51108608	51109992	1385	DEL	ENSBTAG00000040323			Paralogs	protein_coding	Intron
CNVR_7522	19	52743759	52911513	167755	DEL	ENSBTAG00000022489	RNF213		Paralogs	protein_coding	5' UTR
CNVR_7537	19	57470615	57484195	13581	DEL	ENSBTAG00000046693			Paralogs	protein_coding	Entire gene
CNVR_7552	19	58968124	58968757	634	DEL	ENSBTAG00000018837	SLC39A11	solute carrier family 39 member 11 [Source:HGNC Symbol;Acc:HGNC:14463]	No_Paralogs	protein_coding	Intron
CNVR_7569	19	62347608	62406023	58416	DEL	ENSBTAG00000010637	ARSG	arylsulfatase G [Source:RefSeq peptide;Acc:NP_001095437]	Paralogs	protein_coding	Entire gene
CNVR_6730	18	15506516	21364612	5858097	DEL	ENSBTAG00000006291	CYLD	CYLD lysine 63 deubiquitinase [Source:HGNC Symbol;Acc:HGNC:2584]	No_Paralogs	protein_coding	Entire gene
CNVR_4568	14	62869204	63401279	532076	DEL	ENSBTAG00000021449	DCAF13	DDB1 and CUL4 associated factor 13 [Source:HGNC Symbol;Acc:HGNC:24535]	No_Paralogs	protein_coding	Entire gene
CNVR_11676	27	10742343	15979016	5236674	DEL	ENSBTAG00000020282	DCTD	dCMP deaminase [Source:HGNC Symbol;Acc:HGNC:2710]	No_Paralogs	protein_coding	Entire gene
CNVR_7619	2	5706778	7047584	1340807	DEL	ENSBTAG00000007719	MFSD6	major facilitator superfamily domain containing 6 [Source:HGNC Symbol;Acc:HGNC:24711]	Paralogs	protein_coding	Entire gene
CNVR_11771	27	23713902	26384172	2670271	DUP	ENSBTAG00000000744	DCTN6	dynactin subunit 6 [Source:HGNC Symbol;Acc:HGNC:16964]	No_Paralogs	protein_coding	Entire gene
CNVR_6602	17	72514751	72532500	17750	DEL	ENSBTAG00000001295	DEPDC5	DEP domain containing 5 [Source:HGNC Symbol;Acc:HGNC:18423]	No_Paralogs	protein_coding	Some exons
CNVR_7619	2	5706778	7047584	1340807	DEL	ENSBTAG00000011808	MSTN	Growth/differentiation factor 8 [Source:UniProtKB/Swiss-Prot;Acc:O18836]	Paralogs	protein_coding	Entire gene
CNVR_13246	3	41237073	48958884	7721812	DEL	ENSBTAG00000019029	DPH5	diphthamide biosynthesis 5 [Source:HGNC Symbol;Acc:HGNC:24270]	No_Paralogs	protein_coding	Entire gene
CNVR_13246	3	41237073	48958884	7721812	DEL	ENSBTAG00000031358	DPYD	dihydropyrimidine dehydrogenase [Source:HGNC Symbol;Acc:HGNC:3012]	No_Paralogs	protein_coding	Entire gene
CNVR_7619	2	5706778	7047584	1340807	DEL	ENSBTAG00000012561	ORMDL1	ORMDL sphingolipid biosynthesis regulator 1 [Source:HGNC Symbol;Acc:HGNC:16036]	Paralogs	protein_coding	Entire gene
CNVR_7619	2	5706778	7047584	1340807	DEL	ENSBTAG00000015678	NEMP2	nuclear envelope integral membrane protein 2 [Source:HGNC Symbol;Acc:HGNC:33700]	Paralogs	protein_coding	Entire gene
CNVR_7619	2	5706778	7047584	1340807	DEL	ENSBTAG00000018795	PMS1	PMS1 homolog 1, mismatch repair system component [Source:HGNC Symbol;Acc:HGNC:9121]	Paralogs	protein_coding	Entire gene
CNVR_1219	1	151158026	151251890	93865	DEL	ENSBTAG00000004791	DSCR3	Down syndrome critical region protein 3 [Source:RefSeq peptide;Acc:NP_001035600]	No_Paralogs	protein_coding	Entire gene
CNVR_7623	2	6051501	6053735	2235	DEL	ENSBTAG00000026994	C2orf88	chromosome 2 open reading frame 88 [Source:HGNC Symbol;Acc:HGNC:28191]	No_Paralogs	protein_coding	Intron
CNVR_7624	2	6098225	6099029	805	DEL	ENSBTAG00000026994	C2orf88	chromosome 2 open reading frame 88 [Source:HGNC Symbol;Acc:HGNC:28191]	No_Paralogs	protein_coding	Intron
CNVR_7630	2	6606320	6607833	1514	DEL	ENSBTAG00000000492	ASNSD1	asparagine synthetase domain containing 1 [Source:HGNC Symbol;Acc:HGNC:24910]	No_Paralogs	protein_coding	Intron
CNVR_7651	2	8920809	8921513	705	DEL	ENSBTAG00000008483	CALCRL	calcitonin receptor like receptor [Source:HGNC Symbol;Acc:HGNC:16709]	Paralogs	protein_coding	Intron
CNVR_7726	2	18103221	18104487	1267	DEL	ENSBTAG00000026986	TTN	titin [Source:HGNC Symbol;Acc:HGNC:12403]	Paralogs	protein_coding	Intron
CNVR_7755	2	24201400	24202021	622	DEL	ENSBTAG00000017266	ITGA6	integrin subunit alpha 6 [Source:HGNC Symbol;Acc:HGNC:6142]	Paralogs	protein_coding	Intron
CNVR_7795	2	30385287	30386883	1597	DEL	ENSBTAG00000018520	SCN1A	sodium voltage-gated channel alpha subunit 1 [Source:HGNC Symbol;Acc:HGNC:10585]	Paralogs	protein_coding	Intron
CNVR_7828	2	36018751	36021191	2441	DEL	ENSBTAG00000005180	RBMS1	RNA binding motif single stranded interacting protein 1 [Source:HGNC Symbol;Acc:HGNC:9907]	Paralogs	protein_coding	Intron
CNVR_7829	2	36318936	36319572	637	DEL	ENSBTAG00000009080	ITGB6	integrin subunit beta 6 [Source:HGNC Symbol;Acc:HGNC:6161]	Paralogs	protein_coding	Intron
CNVR_7837	2	38037694	38039323	1630	DEL	ENSBTAG00000004267	CCDC148		No_Paralogs	protein_coding	Intron
CNVR_7840	2	38687683	38688779	1097	DEL	ENSBTAG00000008329	CYTIP	cytohesin 1 interacting protein [Source:HGNC Symbol;Acc:HGNC:9506]	Paralogs	protein_coding	Intron
CNVR_7869	2	41824541	41825229	689	DEL	ENSBTAG00000005562	GALNT13	polypeptide N-acetylgalactosaminyltransferase 13 [Source:HGNC Symbol;Acc:HGNC:23242]	Paralogs	protein_coding	Intron
CNVR_7870	2	42187910	42217704	29795	DEL	ENSBTAG00000005562	GALNT13	polypeptide N-acetylgalactosaminyltransferase 13 [Source:HGNC Symbol;Acc:HGNC:23242]	Paralogs	protein_coding	Intron
CNVR_7879	2	43381329	43382833	1505	DEL	ENSBTAG00000012816			Paralogs	protein_coding	Entire gene
CNVR_7886	2	44658751	44674200	15450	DUP	ENSBTAG00000006907	NEB	nebulin [Source:HGNC Symbol;Acc:HGNC:7720]	Paralogs	protein_coding	Some exons
CNVR_7906	2	47072001	47073793	1793	DEL	ENSBTAG00000019683	LYPD6B	LY6/PLAUR domain containing 6B [Source:HGNC Symbol;Acc:HGNC:27018]	Paralogs	protein_coding	Intron
CNVR_7909	2	47424901	47427345	2445	DEL	ENSBTAG00000018125	KIF5C	kinesin heavy chain isoform 5C [Source:RefSeq peptide;Acc:NP_001069595]	Paralogs	protein_coding	Intron
CNVR_7984	2	60475891	60524810	48920	DEL	ENSBTAG00000044055	THSD7B	thrombospondin type 1 domain containing 7B [Source:HGNC Symbol;Acc:HGNC:29348]	Paralogs	protein_coding	Some exons
CNVR_18888	9	84006441	84037874	31434	DEL	ENSBTAG00000015181	EPM2A	EPM2A, laforin glucan phosphatase [Source:HGNC Symbol;Acc:HGNC:3413]	No_Paralogs	protein_coding	Some exons
CNVR_8011	2	65112488	65114115	1628	DEL	ENSBTAG00000005238	NCKAP5	NCK associated protein 5 [Source:HGNC Symbol;Acc:HGNC:29847]	Paralogs	protein_coding	Intron
CNVR_8032	2	68018701	68019944	1244	DEL	ENSBTAG00000005235	DPP10	dipeptidyl peptidase like 10 [Source:HGNC Symbol;Acc:HGNC:20823]	Paralogs	protein_coding	Intron
CNVR_8058	2	72313421	72316692	3272	DEL	ENSBTAG00000018236	EPB41L5	erythrocyte membrane protein band 4.1 like 5 [Source:HGNC Symbol;Acc:HGNC:19819]	Paralogs	protein_coding	Intron
CNVR_8094	2	77046738	77047671	934	DEL	ENSBTAG00000031898	CNTNAP5	contactin associated protein like 5 [Source:HGNC Symbol;Acc:HGNC:18748]	Paralogs	protein_coding	Intron
CNVR_8187	2	86862301	86863618	1318	DEL	ENSBTAG00000007635	PLCL1	phospholipase C like 1 [Source:HGNC Symbol;Acc:HGNC:9063]	Paralogs	protein_coding	Intron
CNVR_8201	2	89166212	89166863	652	DEL	ENSBTAG00000024003			Paralogs	protein_coding	Entire gene
CNVR_8204	2	89573001	89595500	22500	DUP	ENSBTAG00000009725	AOX1	aldehyde oxidase 1 [Source:RefSeq peptide;Acc:NP_788841]	Paralogs	protein_coding	3' UTR
CNVR_8205	2	89767685	89768842	1158	DEL	ENSBTAG00000038878		Bos taurus aldehyde oxidase 1-like	Paralogs	protein_coding	Some exons
CNVR_8207	2	90602827	90603637	811	DEL	ENSBTAG00000017437	TMEM237	transmembrane protein 237 [Source:HGNC Symbol;Acc:HGNC:14432]	No_Paralogs	protein_coding	Intron
CNVR_8224	2	92993374	92995813	2440	DEL	ENSBTAG00000040367			Paralogs	protein_coding	Entire gene
CNVR_8234	2	94485471	94486305	835	DEL	ENSBTAG00000011971	NRP2	neuropilin 2 [Source:HGNC Symbol;Acc:HGNC:8005]	Paralogs	protein_coding	Intron
CNVR_8295	2	101900810	101901574	765	DEL	ENSBTAG00000018549	SPAG16		Paralogs	protein_coding	Intron
CNVR_8315	2	104806801	105018500	211700	DEL	ENSBTAG00000026788	SHOX	short stature homeobox [Source:HGNC Symbol;Acc:HGNC:10853]	Paralogs	protein_coding	Entire gene
CNVR_8315	2	104806801	105018500	211700	DEL	ENSBTAG00000016183	MARCH4	E3 ubiquitin-protein ligase MARCH4 precursor [Source:RefSeq peptide;Acc:NP_001192420]	Paralogs	protein_coding	5' UTR
CNVR_8329	2	106795201	106797750	2550	DEL	ENSBTAG00000045124			Paralogs	miRNA	Entire gene
CNVR_8350	2	111418793	111419627	835	DEL	ENSBTAG00000046649	SGPP2	sphingosine-1-phosphate phosphatase 2 [Source:HGNC Symbol;Acc:HGNC:19953]	Paralogs	protein_coding	Intron
CNVR_8352	2	111796751	111816000	19250	DEL	ENSBTAG00000017258	ACSL3	long-chain-fatty-acid--CoA ligase 3 [Source:RefSeq peptide;Acc:NP_001192397]	Paralogs	protein_coding	Some exons
CNVR_8353	2	111799759	111832571	32813	DEL	ENSBTAG00000005315	RPS6	40S ribosomal protein S6 [Source:RefSeq peptide;Acc:NP_001015548]	Paralogs	protein_coding	Entire gene
CNVR_8353	2	111799759	111832571	32813	DEL	ENSBTAG00000017258	ACSL3	long-chain-fatty-acid--CoA ligase 3 [Source:RefSeq peptide;Acc:NP_001192397]	Paralogs	protein_coding	Intron
CNVR_8373	2	114368245	114368936	692	DEL	ENSBTAG00000019152	NYAP2	neuronal tyrosine-phosphorylated phosphoinositide-3-kinase adaptor 2 [Source:HGNC Symbol;Acc:HGNC:29291]	Paralogs	protein_coding	Intron
CNVR_8378	2	115899446	115900303	858	DEL	ENSBTAG00000023963	RHBDD1	rhomboid-related protein 4 [Source:RefSeq peptide;Acc:NP_001071463]	No_Paralogs	protein_coding	Intron
CNVR_8391	2	118070699	118073500	2802	DEL	ENSBTAG00000037640	PID1	phosphotyrosine interaction domain containing 1 [Source:HGNC Symbol;Acc:HGNC:26084]	No_Paralogs	protein_coding	Intron
CNVR_11971	28	2275709	4192646	1916938	DEL	ENSBTAG00000006111	EXOC8	exocyst complex component 8 [Source:HGNC Symbol;Acc:HGNC:24659]	No_Paralogs	protein_coding	Entire gene
CNVR_8426	2	126447052	126447808	757	DEL	ENSBTAG00000018374	WASF2	WAS protein family member 2 [Source:HGNC Symbol;Acc:HGNC:12733]	Paralogs	protein_coding	Intron
CNVR_8443	2	129315601	129317400	1800	DEL	ENSBTAG00000001101	IFNLR1	interferon lambda receptor 1 [Source:HGNC Symbol;Acc:HGNC:18584]	No_Paralogs	protein_coding	Intron
CNVR_8462	2	132487201	132488100	900	DEL	ENSBTAG00000018656	HP1BP3	heterochromatin protein 1 binding protein 3 [Source:HGNC Symbol;Acc:HGNC:24973]	No_Paralogs	protein_coding	Intron
CNVR_8473	2	133284251	133296500	12250	DUP	ENSBTAG00000005759		Phospholipase A2, membrane associated [Source:UniProtKB/Swiss-Prot;Acc:Q56JZ2]	Paralogs	protein_coding	Entire gene
CNVR_8480	2	134411207	135715574	1304368	DEL	ENSBTAG00000000684	ARHGEF10L	Rho guanine nucleotide exchange factor 10 like [Source:HGNC Symbol;Acc:HGNC:25540]	Paralogs	protein_coding	Entire gene
CNVR_8480	2	134411207	135715574	1304368	DEL	ENSBTAG00000006438	ACTL8	actin like 8 [Source:HGNC Symbol;Acc:HGNC:24018]	Paralogs	protein_coding	Entire gene
CNVR_8480	2	134411207	135715574	1304368	DEL	ENSBTAG00000014967	PAX7	paired box 7 [Source:HGNC Symbol;Acc:HGNC:8621]	Paralogs	protein_coding	Entire gene
CNVR_3635	13	10960139	17846162	6886024	DEL	ENSBTAG00000004147	FBXO18	F-box protein, helicase, 18 [Source:HGNC Symbol;Acc:HGNC:13620]	No_Paralogs	protein_coding	Entire gene
CNVR_8480	2	134411207	135715574	1304368	DEL	ENSBTAG00000030322	KLHDC7A	kelch domain containing 7A [Source:HGNC Symbol;Acc:HGNC:26791]	Paralogs	protein_coding	Entire gene
CNVR_8495	2	136800262	137060500	260239	CNV	ENSBTAG00000046826	5S_rRNA	5S ribosomal RNA [Source:RFAM;Acc:RF00001]	Paralogs	rRNA	Entire gene
CNVR_8495	2	136800262	137060500	260239	CNV	ENSBTAG00000048232	5S_rRNA	5S ribosomal RNA [Source:RFAM;Acc:RF00001]	Paralogs	rRNA	Entire gene
CNVR_8507	20	431633	432594	962	DEL	ENSBTAG00000017746	SLIT3	slit guidance ligand 3 [Source:HGNC Symbol;Acc:HGNC:11087]	Paralogs	protein_coding	Intron
CNVR_8513	20	1609471	1610718	1248	DEL	ENSBTAG00000014612	DOCK2	dedicator of cytokinesis 2 [Source:HGNC Symbol;Acc:HGNC:2988]	Paralogs	protein_coding	Intron
CNVR_8539	20	7672996	7674098	1103	DEL	ENSBTAG00000005633	ARHGEF28	rho guanine nucleotide exchange factor 28 [Source:RefSeq peptide;Acc:NP_001095777]	Paralogs	protein_coding	Intron
CNVR_8610	20	18306806	18309326	2521	DEL	ENSBTAG00000021607	NDUFAF2	Bos taurus NADH dehydrogenase	No_Paralogs	protein_coding	Intron
CNVR_8706	20	32720001	32726500	6500	DEL	ENSBTAG00000033186	OXCT1	3-oxoacid CoA-transferase 1 [Source:HGNC Symbol;Acc:HGNC:8527]	No_Paralogs	protein_coding	Intron
CNVR_8708	20	33124115	33129341	5227	DEL	ENSBTAG00000010822	PLCXD3	phosphatidylinositol specific phospholipase C X domain containing 3 [Source:HGNC Symbol;Acc:HGNC:31822]	Paralogs	protein_coding	Intron
CNVR_8709	20	33174616	33176866	2251	DEL	ENSBTAG00000010822	PLCXD3	phosphatidylinositol specific phospholipase C X domain containing 3 [Source:HGNC Symbol;Acc:HGNC:31822]	Paralogs	protein_coding	Intron
CNVR_8730	20	36738001	36740028	2028	DEL	ENSBTAG00000033095	WDR70	WD repeat domain 70 [Source:HGNC Symbol;Acc:HGNC:25495]	No_Paralogs	protein_coding	Intron
CNVR_8744	20	40092695	40095088	2394	DEL	ENSBTAG00000012558	ADAMTS12	ADAM metallopeptidase with thrombospondin type 1 motif 12 [Source:HGNC Symbol;Acc:HGNC:14605]	Paralogs	protein_coding	Intron
CNVR_8818	20	46270033	52092102	5822070	DEL	ENSBTAG00000002845	CDH10	cadherin 10 [Source:HGNC Symbol;Acc:HGNC:1749]	Paralogs	protein_coding	Entire gene
CNVR_8818	20	46270033	52092102	5822070	DEL	ENSBTAG00000018234	CDH9	cadherin 9 [Source:HGNC Symbol;Acc:HGNC:1768]	Paralogs	protein_coding	Entire gene
CNVR_8818	20	46270033	52092102	5822070	DEL	ENSBTAG00000025893	CDH12	cadherin 12 [Source:HGNC Symbol;Acc:HGNC:1751]	Paralogs	protein_coding	Entire gene
CNVR_8818	20	46270033	52092102	5822070	DEL	ENSBTAG00000042459	U11	U11 spliceosomal RNA [Source:RFAM;Acc:RF00548]	Paralogs	snRNA	Entire gene
CNVR_8818	20	46270033	52092102	5822070	DEL	ENSBTAG00000045813			Paralogs	protein_coding	Entire gene
CNVR_8818	20	46270033	52092102	5822070	DEL	ENSBTAG00000048105			Paralogs	protein_coding	Entire gene
CNVR_8842	20	47991805	47992940	1136	DEL	ENSBTAG00000045813			Paralogs	protein_coding	Entire gene
CNVR_8908	20	53699501	53705500	6000	DEL	ENSBTAG00000037844	CDH18	cadherin 18 [Source:HGNC Symbol;Acc:HGNC:1757]	Paralogs	protein_coding	Intron
CNVR_8910	20	53900001	53901026	1026	DEL	ENSBTAG00000037844	CDH18	cadherin 18 [Source:HGNC Symbol;Acc:HGNC:1757]	Paralogs	protein_coding	Intron
CNVR_8935	20	55750751	55753800	3050	DUP	ENSBTAG00000005491			Paralogs	protein_coding	Entire gene
CNVR_8978	20	59501096	59502178	1083	DEL	ENSBTAG00000021972	DNAH5	dynein axonemal heavy chain 5 [Source:HGNC Symbol;Acc:HGNC:2950]	Paralogs	protein_coding	Intron
CNVR_9003	20	61913751	61921800	8050	DEL	ENSBTAG00000017222	CTNND2	catenin delta 2 [Source:HGNC Symbol;Acc:HGNC:2516]	Paralogs	protein_coding	Some exons
CNVR_9007	20	62244951	62245863	913	DEL	ENSBTAG00000017222	CTNND2	catenin delta 2 [Source:HGNC Symbol;Acc:HGNC:2516]	Paralogs	protein_coding	Intron
CNVR_9041	20	65643305	65644091	787	DEL	ENSBTAG00000019210	ADCY2	adenylate cyclase 2 [Source:HGNC Symbol;Acc:HGNC:233]	Paralogs	protein_coding	Intron
CNVR_9099	21	16610	23143	6534	DEL	ENSBTAG00000008251	SNRPN	small nuclear ribonucleoprotein polypeptide N [Source:HGNC Symbol;Acc:HGNC:11164]	Paralogs	protein_coding	Some exons
CNVR_9111	21	1354014	1968202	614189	DEL	ENSBTAG00000006621			Paralogs	protein_coding	Entire gene
CNVR_9111	21	1354014	1968202	614189	DEL	ENSBTAG00000006648			Paralogs	protein_coding	Entire gene
CNVR_9111	21	1354014	1968202	614189	DEL	ENSBTAG00000013567		olfactory receptor family 5 subfamily D member 13	Paralogs	protein_coding	Entire gene
CNVR_9111	21	1354014	1968202	614189	DEL	ENSBTAG00000023079			Paralogs	protein_coding	Entire gene
CNVR_9111	21	1354014	1968202	614189	DEL	ENSBTAG00000035268	5S_rRNA	5S ribosomal RNA [Source:RFAM;Acc:RF00001]	Paralogs	rRNA	Entire gene
CNVR_9111	21	1354014	1968202	614189	DEL	ENSBTAG00000035333			Paralogs	protein_coding	Entire gene
CNVR_9111	21	1354014	1968202	614189	DEL	ENSBTAG00000042140	U6	U6 spliceosomal RNA [Source:RFAM;Acc:RF00026]	Paralogs	snRNA	Entire gene
CNVR_9111	21	1354014	1968202	614189	DEL	ENSBTAG00000042316	U6	U6 spliceosomal RNA [Source:RFAM;Acc:RF00026]	Paralogs	snRNA	Entire gene
CNVR_9111	21	1354014	1968202	614189	DEL	ENSBTAG00000044247	5S_rRNA	5S ribosomal RNA [Source:RFAM;Acc:RF00001]	Paralogs	rRNA	Entire gene
CNVR_9111	21	1354014	1968202	614189	DEL	ENSBTAG00000048284	5S_rRNA	5S ribosomal RNA [Source:RFAM;Acc:RF00001]	Paralogs	rRNA	Entire gene
CNVR_9117	21	1682518	1813217	130700	CNV	ENSBTAG00000006648			Paralogs	protein_coding	Entire gene
CNVR_9132	21	4038322	4039397	1076	DEL	ENSBTAG00000013422	GABRB3	gamma-aminobutyric acid type A receptor beta3 subunit [Source:HGNC Symbol;Acc:HGNC:4083]	Paralogs	protein_coding	Intron
CNVR_9143	21	7062197	7063079	883	DEL	ENSBTAG00000010649	MEF2A	myocyte enhancer factor 2A [Source:HGNC Symbol;Acc:HGNC:6993]	Paralogs	protein_coding	Intron
CNVR_9206	21	16221961	16224115	2155	DEL	ENSBTAG00000027074	SV2B	synaptic vesicle glycoprotein 2B [Source:HGNC Symbol;Acc:HGNC:16874]	Paralogs	protein_coding	Intron
CNVR_9230	21	20069270	20676469	607200	CNV	ENSBTAG00000001308			Paralogs	protein_coding	Entire gene
CNVR_9230	21	20069270	20676469	607200	CNV	ENSBTAG00000001526			Paralogs	protein_coding	Entire gene
CNVR_9230	21	20069270	20676469	607200	CNV	ENSBTAG00000002786			Paralogs	protein_coding	Entire gene
CNVR_9230	21	20069270	20676469	607200	CNV	ENSBTAG00000004339			Paralogs	protein_coding	Entire gene
CNVR_9230	21	20069270	20676469	607200	CNV	ENSBTAG00000012326			Paralogs	protein_coding	Entire gene
CNVR_9230	21	20069270	20676469	607200	CNV	ENSBTAG00000036082			Paralogs	protein_coding	Entire gene
CNVR_9230	21	20069270	20676469	607200	CNV	ENSBTAG00000038494			Paralogs	protein_coding	Entire gene
CNVR_9230	21	20069270	20676469	607200	CNV	ENSBTAG00000040580			Paralogs	protein_coding	Entire gene
CNVR_9230	21	20069270	20676469	607200	CNV	ENSBTAG00000045929			Paralogs	protein_coding	Entire gene
CNVR_9230	21	20069270	20676469	607200	CNV	ENSBTAG00000046377			Paralogs	protein_coding	Entire gene
CNVR_9230	21	20069270	20676469	607200	CNV	ENSBTAG00000046412			Paralogs	protein_coding	Entire gene
CNVR_9230	21	20069270	20676469	607200	CNV	ENSBTAG00000046591			No_Paralogs	pseudogene	Entire gene
CNVR_9230	21	20069270	20676469	607200	CNV	ENSBTAG00000047729			No_Paralogs	protein_coding	Entire gene
CNVR_9289	21	27667958	27670885	2928	DEL	ENSBTAG00000012166	TMC3	transmembrane channel like 3 [Source:HGNC Symbol;Acc:HGNC:22995]	Paralogs	protein_coding	Intron
CNVR_9296	21	29352251	29355341	3091	DEL	ENSBTAG00000007649	TM2D3	TM2 domain containing 3 [Source:HGNC Symbol;Acc:HGNC:24128]	Paralogs	protein_coding	Intron
CNVR_9298	21	29626934	29628392	1459	DEL	ENSBTAG00000006675	PCSK6	proprotein convertase subtilisin/kexin type 6 [Source:HGNC Symbol;Acc:HGNC:8569]	Paralogs	protein_coding	Intron
CNVR_9308	21	30677401	30680400	3000	DEL	ENSBTAG00000006868	OTUD7A	OTU domain-containing protein 7A [Source:RefSeq peptide;Acc:NP_001193897]	Paralogs	protein_coding	Intron
CNVR_9318	21	34492970	34493825	856	DEL	ENSBTAG00000011828	ARID3B	AT-rich interaction domain 3B [Source:HGNC Symbol;Acc:HGNC:14350]	Paralogs	protein_coding	Intron
CNVR_9322	21	35208333	35236172	27840	DEL	ENSBTAG00000013055			Paralogs	protein_coding	Entire gene
CNVR_9322	21	35208333	35236172	27840	DEL	ENSBTAG00000038080			Paralogs	protein_coding	Entire gene
CNVR_9322	21	35208333	35236172	27840	DEL	ENSBTAG00000010828			Paralogs	protein_coding	5' UTR
CNVR_9328	21	35569519	35571102	1584	DEL	ENSBTAG00000021291	STXBP6	syntaxin binding protein 6 [Source:HGNC Symbol;Acc:HGNC:19666]	Paralogs	protein_coding	Intron
CNVR_9329	21	35597751	35599951	2201	DEL	ENSBTAG00000021291	STXBP6	syntaxin binding protein 6 [Source:HGNC Symbol;Acc:HGNC:19666]	Paralogs	protein_coding	Intron
CNVR_9373	21	41701290	41702213	924	DEL	ENSBTAG00000017565	SCFD1	sec1 family domain containing 1 [Source:HGNC Symbol;Acc:HGNC:20726]	No_Paralogs	protein_coding	Intron
CNVR_9375	21	41733178	41736314	3137	DEL	ENSBTAG00000017565	SCFD1	sec1 family domain containing 1 [Source:HGNC Symbol;Acc:HGNC:20726]	No_Paralogs	protein_coding	Intron
CNVR_9381	21	42571196	42572025	830	DEL	ENSBTAG00000044121	NUBPL	nucleotide binding protein like [Source:HGNC Symbol;Acc:HGNC:20278]	Paralogs	protein_coding	Intron
CNVR_9402	21	47773329	47775076	1748	DEL	ENSBTAG00000019350	SLC25A21	solute carrier family 25 member 21 [Source:HGNC Symbol;Acc:HGNC:14411]	No_Paralogs	protein_coding	Intron
CNVR_9405	21	48075319	48076258	940	DEL	ENSBTAG00000000655	MIPOL1		No_Paralogs	protein_coding	Intron
CNVR_9433	21	51797966	51804300	6335	DEL	ENSBTAG00000003684	LRFN5		Paralogs	protein_coding	Intron
CNVR_9435	21	51947053	51947719	667	DEL	ENSBTAG00000003684	LRFN5		Paralogs	protein_coding	Intron
CNVR_9437	21	52055218	52057500	2283	DEL	ENSBTAG00000003684	LRFN5		Paralogs	protein_coding	Intron
CNVR_9456	21	54196768	54198283	1516	DEL	ENSBTAG00000047240			Paralogs	protein_coding	Entire gene
CNVR_9473	21	55609438	55610248	811	DEL	ENSBTAG00000000425		60S ribosomal protein L17 [Source:UniProtKB/Swiss-Prot;Acc:Q3T025]	Paralogs	protein_coding	Entire gene
CNVR_9481	21	57216697	57217801	1105	DEL	ENSBTAG00000018123	FBLN5	fibulin 5 [Source:HGNC Symbol;Acc:HGNC:3602]	Paralogs	protein_coding	Intron
CNVR_9493	21	58785153	58789500	4348	DEL	ENSBTAG00000008017	UNC79	unc-79 homolog	No_Paralogs	protein_coding	Intron
CNVR_9499	21	59331751	59334600	2850	DUP	ENSBTAG00000003152			Paralogs	protein_coding	Some exons
CNVR_9542	21	66493809	66494758	950	DEL	ENSBTAG00000013491	EML1	echinoderm microtubule associated protein like 1 [Source:HGNC Symbol;Acc:HGNC:3330]	Paralogs	protein_coding	Intron
CNVR_9543	21	66691738	66692650	913	DEL	ENSBTAG00000009293	EVL	Enah/Vasp-like [Source:HGNC Symbol;Acc:HGNC:20234]	Paralogs	protein_coding	Intron
CNVR_9556	21	69421673	69433261	11589	DEL	ENSBTAG00000026893	EXOC3L4	exocyst complex component 3-like protein 4 [Source:RefSeq peptide;Acc:NP_001192859]	Paralogs	protein_coding	3' UTR
CNVR_9578	21	71498606	71526848	28243	DEL	ENSBTAG00000046161			Paralogs	protein_coding	Entire gene
CNVR_9593	22	1695251	1699200	3950	DEL	ENSBTAG00000000220	NEK10		Paralogs	protein_coding	Intron
CNVR_9615	22	4489869	4491308	1440	DEL	ENSBTAG00000044062	RBMS3	RNA binding motif single stranded interacting protein 3 [Source:HGNC Symbol;Acc:HGNC:13427]	Paralogs	protein_coding	Intron
CNVR_9625	22	5856609	7696206	1839598	DEL	ENSBTAG00000003952	FBXL2	F-box and leucine rich repeat protein 2 [Source:HGNC Symbol;Acc:HGNC:13598]	Paralogs	protein_coding	Some exons
CNVR_9625	22	5856609	7696206	1839598	DEL	ENSBTAG00000001710	CMTM8	CKLF like MARVEL transmembrane domain containing 8 [Source:HGNC Symbol;Acc:HGNC:19179]	Paralogs	protein_coding	Entire gene
CNVR_10855	24	57151906	57889075	737170	DEL	ENSBTAG00000006393	FECH	ferrochelatase [Source:HGNC Symbol;Acc:HGNC:3647]	No_Paralogs	protein_coding	Entire gene
CNVR_16493	6	108528487	109317393	788907	DEL	ENSBTAG00000027464	FGFRL1	fibroblast growth factor receptor-like 1 precursor [Source:RefSeq peptide;Acc:NP_001192925]	No_Paralogs	protein_coding	Entire gene
CNVR_4136	14	2696382	2738579	42198	CNV	ENSBTAG00000004595	GML	glycosylphosphatidylinositol anchored molecule like [Source:HGNC Symbol;Acc:HGNC:4375]	No_Paralogs	protein_coding	Some exons
CNVR_9625	22	5856609	7696206	1839598	DEL	ENSBTAG00000007438	STT3B	STT3B, catalytic subunit of the oligosaccharyltransferase complex [Source:HGNC Symbol;Acc:HGNC:30611]	Paralogs	protein_coding	Entire gene
CNVR_9625	22	5856609	7696206	1839598	DEL	ENSBTAG00000009194	OSBPL10	oxysterol binding protein like 10 [Source:HGNC Symbol;Acc:HGNC:16395]	Paralogs	protein_coding	Entire gene
CNVR_9625	22	5856609	7696206	1839598	DEL	ENSBTAG00000009826	GPD1L	glycerol-3-phosphate dehydrogenase 1-like [Source:HGNC Symbol;Acc:HGNC:28956]	Paralogs	protein_coding	Entire gene
CNVR_9625	22	5856609	7696206	1839598	DEL	ENSBTAG00000014700	DYNC1LI1	dynein cytoplasmic 1 light intermediate chain 1 [Source:HGNC Symbol;Acc:HGNC:18745]	Paralogs	protein_coding	Entire gene
CNVR_9625	22	5856609	7696206	1839598	DEL	ENSBTAG00000015254	GLB1	galactosidase beta 1 [Source:HGNC Symbol;Acc:HGNC:4298]	Paralogs	protein_coding	Entire gene
CNVR_9625	22	5856609	7696206	1839598	DEL	ENSBTAG00000019526	CMTM6	CKLF like MARVEL transmembrane domain containing 6 [Source:HGNC Symbol;Acc:HGNC:19177]	Paralogs	protein_coding	Entire gene
CNVR_9625	22	5856609	7696206	1839598	DEL	ENSBTAG00000021442	CRTAP	cartilage associated protein [Source:HGNC Symbol;Acc:HGNC:2379]	Paralogs	protein_coding	Entire gene
CNVR_9625	22	5856609	7696206	1839598	DEL	ENSBTAG00000022744	TRIM71	tripartite motif containing 71 [Source:HGNC Symbol;Acc:HGNC:32669]	Paralogs	protein_coding	Entire gene
CNVR_9625	22	5856609	7696206	1839598	DEL	ENSBTAG00000025595			Paralogs	protein_coding	Entire gene
CNVR_9625	22	5856609	7696206	1839598	DEL	ENSBTAG00000034871			Paralogs	protein_coding	Entire gene
CNVR_9625	22	5856609	7696206	1839598	DEL	ENSBTAG00000034883	CCR4	C-C motif chemokine receptor 4 [Source:HGNC Symbol;Acc:HGNC:1605]	Paralogs	protein_coding	Entire gene
CNVR_9625	22	5856609	7696206	1839598	DEL	ENSBTAG00000042124	U6atac	U6atac minor spliceosomal RNA [Source:RFAM;Acc:RF00619]	Paralogs	snRNA	Entire gene
CNVR_9625	22	5856609	7696206	1839598	DEL	ENSBTAG00000043125	U11	U11 spliceosomal RNA [Source:RFAM;Acc:RF00548]	Paralogs	snRNA	Entire gene
CNVR_9637	22	7698301	7708500	10200	DEL	ENSBTAG00000003952	FBXL2	F-box and leucine rich repeat protein 2 [Source:HGNC Symbol;Acc:HGNC:13598]	Paralogs	protein_coding	Intron
CNVR_9649	22	11198038	11199750	1713	DEL	ENSBTAG00000016566	ITGA9	integrin alpha-9 precursor [Source:RefSeq peptide;Acc:NP_001179647]	Paralogs	protein_coding	Intron
CNVR_9697	22	19010610	19012076	1467	DEL	ENSBTAG00000013047	GRM7	metabotropic glutamate receptor 7 precursor [Source:RefSeq peptide;Acc:NP_001069523]	Paralogs	protein_coding	Intron
CNVR_9705	22	19352323	19354112	1790	DEL	ENSBTAG00000013047	GRM7	metabotropic glutamate receptor 7 precursor [Source:RefSeq peptide;Acc:NP_001069523]	Paralogs	protein_coding	Intron
CNVR_9706	22	19476447	19477808	1362	DEL	ENSBTAG00000013047	GRM7	metabotropic glutamate receptor 7 precursor [Source:RefSeq peptide;Acc:NP_001069523]	Paralogs	protein_coding	Intron
CNVR_9750	22	26244475	26245012	538	DEL	ENSBTAG00000002471	CHL1	neural cell adhesion molecule L1-like protein precursor [Source:RefSeq peptide;Acc:NP_001192470]	Paralogs	protein_coding	Intron
CNVR_9784	22	33486310	33487032	723	DEL	ENSBTAG00000019041	FAM19A1	protein FAM19A1 precursor [Source:RefSeq peptide;Acc:NP_001093197]	Paralogs	protein_coding	Intron
CNVR_9785	22	33518151	33519375	1225	DEL	ENSBTAG00000019041	FAM19A1	protein FAM19A1 precursor [Source:RefSeq peptide;Acc:NP_001093197]	Paralogs	protein_coding	Intron
CNVR_9789	22	34113999	34115230	1232	DEL	ENSBTAG00000009541	SUCLG2	succinate-CoA ligase GDP-forming beta subunit [Source:HGNC Symbol;Acc:HGNC:11450]	Paralogs	protein_coding	Intron
CNVR_9812	22	39725501	40080900	355400	DEL	ENSBTAG00000021911	PTPRG	protein tyrosine phosphatase, receptor type G [Source:HGNC Symbol;Acc:HGNC:9671]	Paralogs	protein_coding	Intron
CNVR_9814	22	40116751	40124250	7500	DEL	ENSBTAG00000021911	PTPRG	protein tyrosine phosphatase, receptor type G [Source:HGNC Symbol;Acc:HGNC:9671]	Paralogs	protein_coding	Intron
CNVR_9820	22	41701751	41710800	9050	DEL	ENSBTAG00000014418	FHIT	fragile histidine triad [Source:HGNC Symbol;Acc:HGNC:3701]	No_Paralogs	protein_coding	Intron
CNVR_9827	22	43089357	43093000	3644	DEL	ENSBTAG00000020373	C3orf67	chromosome 3 open reading frame 67 [Source:HGNC Symbol;Acc:HGNC:24763]	No_Paralogs	protein_coding	Intron
CNVR_9831	22	43769847	43771316	1470	DEL	ENSBTAG00000022004	FLNB	filamin B [Source:HGNC Symbol;Acc:HGNC:3755]	Paralogs	protein_coding	Intron
CNVR_9839	22	44987343	45075007	87665	DEL	ENSBTAG00000019746	CCDC66	coiled-coil domain containing 66 [Source:HGNC Symbol;Acc:HGNC:27709]	No_Paralogs	protein_coding	5' UTR
CNVR_9841	22	45179468	45181696	2229	DEL	ENSBTAG00000010029	ERC2	ELKS/RAB6-interacting/CAST family member 2 [Source:HGNC Symbol;Acc:HGNC:31922]	Paralogs	protein_coding	Intron
CNVR_9853	22	48858297	48868725	10429	DEL	ENSBTAG00000014784	NT5DC2	5'-nucleotidase domain containing 2 [Source:HGNC Symbol;Acc:HGNC:25717]	Paralogs	protein_coding	Intron
CNVR_9855	22	50131364	50132068	705	DEL	ENSBTAG00000001874	DOCK3	dedicator of cytokinesis 3 [Source:HGNC Symbol;Acc:HGNC:2989]	Paralogs	protein_coding	Intron
CNVR_9882	22	55050190	55051009	820	DEL	ENSBTAG00000001305	ATP2B2	plasma membrane calcium-transporting ATPase 2 [Source:RefSeq peptide;Acc:NP_001178174]	Paralogs	protein_coding	Intron
CNVR_9888	22	56554322	56657038	102717	DEL	ENSBTAG00000044332	U6	U6 spliceosomal RNA [Source:RFAM;Acc:RF00026]	Paralogs	snRNA	Entire gene
CNVR_9894	22	57905472	57907538	2067	DEL	ENSBTAG00000013723	MRPS25	mitochondrial ribosomal protein S25 [Source:HGNC Symbol;Acc:HGNC:14511]	No_Paralogs	protein_coding	Intron
CNVR_9906	22	59032713	59034292	1580	DEL	ENSBTAG00000004014	FBLN2	fibulin 2 [Source:HGNC Symbol;Acc:HGNC:3601]	Paralogs	protein_coding	Intron
CNVR_9935	23	816501	818259	1759	DEL	ENSBTAG00000043990	KHDRBS2	KH RNA binding domain containing, signal transduction associated 2 [Source:HGNC Symbol;Acc:HGNC:18114]	Paralogs	protein_coding	Intron
CNVR_9972	23	5444835	5446633	1799	DEL	ENSBTAG00000016058	FAM83B	family with sequence similarity 83 member B [Source:HGNC Symbol;Acc:HGNC:21357]	Paralogs	protein_coding	Intron
CNVR_9978	23	6029538	6030362	825	DEL	ENSBTAG00000012652	TINAG	tubulointerstitial nephritis antigen [Source:HGNC Symbol;Acc:HGNC:14599]	Paralogs	protein_coding	Intron
CNVR_9997	23	10355866	10356742	877	DEL	ENSBTAG00000020595	KCTD20	potassium channel tetramerization domain containing 20 [Source:HGNC Symbol;Acc:HGNC:21052]	Paralogs	protein_coding	Intron
CNVR_10000	23	10432553	10432976	424	DEL	ENSBTAG00000011126	STK38	serine/threonine-protein kinase 38 [Source:RefSeq peptide;Acc:NP_001075071]	Paralogs	protein_coding	Intron
CNVR_10026	23	17866625	21861674	3995050	CNV	ENSBTAG00000000322	CD2AP	CD2 associated protein [Source:HGNC Symbol;Acc:HGNC:14258]	Paralogs	protein_coding	Entire gene
CNVR_10026	23	17866625	21861674	3995050	CNV	ENSBTAG00000000778	HSP90AB1	heat shock protein 90 alpha family class B member 1 [Source:HGNC Symbol;Acc:HGNC:5258]	Paralogs	protein_coding	Entire gene
CNVR_10026	23	17866625	21861674	3995050	CNV	ENSBTAG00000002934	ADGRF4	adhesion G protein-coupled receptor F4 [Source:HGNC Symbol;Acc:HGNC:19011]	Paralogs	protein_coding	Entire gene
CNVR_10026	23	17866625	21861674	3995050	CNV	ENSBTAG00000003499	ENPP4	ectonucleotide pyrophosphatase/phosphodiesterase 4	Paralogs	protein_coding	Entire gene
CNVR_10026	23	17866625	21861674	3995050	CNV	ENSBTAG00000003632	CYP39A1	cytochrome P450 family 39 subfamily A member 1 [Source:HGNC Symbol;Acc:HGNC:17449]	Paralogs	protein_coding	Entire gene
CNVR_10026	23	17866625	21861674	3995050	CNV	ENSBTAG00000004104	RUNX2	runt related transcription factor 2 [Source:HGNC Symbol;Acc:HGNC:10472]	Paralogs	protein_coding	Entire gene
CNVR_10026	23	17866625	21861674	3995050	CNV	ENSBTAG00000004345	MEP1A	meprin A subunit alpha [Source:HGNC Symbol;Acc:HGNC:7015]	Paralogs	protein_coding	Entire gene
CNVR_10026	23	17866625	21861674	3995050	CNV	ENSBTAG00000004347	ADGRF5	adhesion G protein-coupled receptor F5 [Source:HGNC Symbol;Acc:HGNC:19030]	Paralogs	protein_coding	Entire gene
CNVR_10026	23	17866625	21861674	3995050	CNV	ENSBTAG00000008076	SLC35B2	solute carrier family 35 member B2 [Source:HGNC Symbol;Acc:HGNC:16872]	Paralogs	protein_coding	Entire gene
CNVR_10026	23	17866625	21861674	3995050	CNV	ENSBTAG00000009302	RCAN2	Calcipressin-2 [Source:UniProtKB/Swiss-Prot;Acc:Q3ZC15]	Paralogs	protein_coding	Entire gene
CNVR_10026	23	17866625	21861674	3995050	CNV	ENSBTAG00000009978	TDRD6	tudor domain containing 6 [Source:HGNC Symbol;Acc:HGNC:21339]	Paralogs	protein_coding	Entire gene
CNVR_10026	23	17866625	21861674	3995050	CNV	ENSBTAG00000010244	CLIC5	chloride intracellular channel 5 [Source:HGNC Symbol;Acc:HGNC:13517]	Paralogs	protein_coding	Entire gene
CNVR_10026	23	17866625	21861674	3995050	CNV	ENSBTAG00000013705	NFKBIE	NFKB inhibitor epsilon [Source:HGNC Symbol;Acc:HGNC:7799]	Paralogs	protein_coding	Entire gene
CNVR_10026	23	17866625	21861674	3995050	CNV	ENSBTAG00000013711			Paralogs	protein_coding	Entire gene
CNVR_10026	23	17866625	21861674	3995050	CNV	ENSBTAG00000015829	ENPP5	ectonucleotide pyrophosphatase/phosphodiesterase 5	Paralogs	protein_coding	Entire gene
CNVR_10026	23	17866625	21861674	3995050	CNV	ENSBTAG00000016302	SLC25A27	solute carrier family 25 member 27 [Source:HGNC Symbol;Acc:HGNC:21065]	Paralogs	protein_coding	Entire gene
CNVR_10026	23	17866625	21861674	3995050	CNV	ENSBTAG00000016499	OPN5	opsin-5 [Source:RefSeq peptide;Acc:NP_001193009]	Paralogs	protein_coding	Entire gene
CNVR_10026	23	17866625	21861674	3995050	CNV	ENSBTAG00000019315	PLA2G7	phospholipase A2 group VII [Source:HGNC Symbol;Acc:HGNC:9040]	Paralogs	protein_coding	Entire gene
CNVR_10026	23	17866625	21861674	3995050	CNV	ENSBTAG00000020054	TNFRSF21	TNF receptor superfamily member 21 [Source:HGNC Symbol;Acc:HGNC:13469]	Paralogs	protein_coding	Entire gene
CNVR_10026	23	17866625	21861674	3995050	CNV	ENSBTAG00000021415	PTCHD4	patched domain containing 4 [Source:HGNC Symbol;Acc:HGNC:21345]	Paralogs	protein_coding	Entire gene
CNVR_10026	23	17866625	21861674	3995050	CNV	ENSBTAG00000021609	ADGRF1	adhesion G protein-coupled receptor F1 [Source:HGNC Symbol;Acc:HGNC:18990]	Paralogs	protein_coding	Entire gene
CNVR_10026	23	17866625	21861674	3995050	CNV	ENSBTAG00000022736			No_Paralogs	pseudogene	Entire gene
CNVR_13246	3	41237073	48958884	7721812	DEL	ENSBTAG00000021101	GPR88	G protein-coupled receptor 88 [Source:HGNC Symbol;Acc:HGNC:4539]	No_Paralogs	protein_coding	Entire gene
CNVR_10026	23	17866625	21861674	3995050	CNV	ENSBTAG00000037687	ADGRF2	adhesion G protein-coupled receptor F2 [Source:HGNC Symbol;Acc:HGNC:18991]	Paralogs	protein_coding	Entire gene
CNVR_10026	23	17866625	21861674	3995050	CNV	ENSBTAG00000043423	U6	U6 spliceosomal RNA [Source:RFAM;Acc:RF00026]	Paralogs	snRNA	Entire gene
CNVR_10026	23	17866625	21861674	3995050	CNV	ENSBTAG00000044482	U6	U6 spliceosomal RNA [Source:RFAM;Acc:RF00026]	Paralogs	snRNA	Entire gene
CNVR_10026	23	17866625	21861674	3995050	CNV	ENSBTAG00000045355	5S_rRNA	5S ribosomal RNA [Source:RFAM;Acc:RF00001]	Paralogs	rRNA	Entire gene
CNVR_10026	23	17866625	21861674	3995050	CNV	ENSBTAG00000046237			No_Paralogs	pseudogene	Entire gene
CNVR_11771	27	23713902	26384172	2670271	DUP	ENSBTAG00000012691	GTF2E2	general transcription factor IIE subunit 2 [Source:HGNC Symbol;Acc:HGNC:4651]	No_Paralogs	protein_coding	Entire gene
CNVR_10047	23	20934408	20935627	1220	DEL	ENSBTAG00000021415	PTCHD4	patched domain containing 4 [Source:HGNC Symbol;Acc:HGNC:21345]	Paralogs	protein_coding	Intron
CNVR_10073	23	23913178	23914062	885	DEL	ENSBTAG00000011237	PKHD1	PKHD1, fibrocystin/polyductin [Source:HGNC Symbol;Acc:HGNC:9016]	Paralogs	protein_coding	Intron
CNVR_10079	23	24222001	24295000	73000	DUP	ENSBTAG00000011237	PKHD1	PKHD1, fibrocystin/polyductin [Source:HGNC Symbol;Acc:HGNC:9016]	Paralogs	protein_coding	5' UTR
CNVR_10090	23	24643825	24644522	698	DEL	ENSBTAG00000009112	TRAM2	translocation associated membrane protein 2 [Source:HGNC Symbol;Acc:HGNC:16855]	Paralogs	protein_coding	Intron
CNVR_10114	23	25458601	25467250	8650	DEL	ENSBTAG00000013919	BOLA-DRB3		Paralogs	protein_coding	Some exons
CNVR_10131	23	25803761	26049083	245323	CNV	ENSBTAG00000019588	LA-DQB		Paralogs	protein_coding	Entire gene
CNVR_10131	23	25803761	26049083	245323	CNV	ENSBTAG00000033979			Paralogs	protein_coding	Entire gene
CNVR_10157	23	26267501	26371250	103750	DEL	ENSBTAG00000026163			Paralogs	protein_coding	Entire gene
CNVR_10183	23	26732999	26734545	1547	DEL	ENSBTAG00000023541	C6orf10	chromosome 6 open reading frame 10 [Source:HGNC Symbol;Acc:HGNC:13922]	No_Paralogs	protein_coding	Intron
CNVR_10200	23	27650804	27738687	87884	CNV	ENSBTAG00000005182	BOLA-A	Bos taurus major histocompatibility complex, class I, A	Paralogs	protein_coding	3' UTR
CNVR_10200	23	27650804	27738687	87884	CNV	ENSBTAG00000001476			Paralogs	protein_coding	Entire gene
CNVR_10200	23	27650804	27738687	87884	CNV	ENSBTAG00000010166			Paralogs	protein_coding	Entire gene
CNVR_10200	23	27650804	27738687	87884	CNV	ENSBTAG00000012208			Paralogs	protein_coding	Entire gene
CNVR_10203	23	27688326	27879750	191425	DEL	ENSBTAG00000001476			Paralogs	protein_coding	Entire gene
CNVR_6730	18	15506516	21364612	5858097	DEL	ENSBTAG00000016640	HEATR3	HEAT repeat containing 3 [Source:HGNC Symbol;Acc:HGNC:26087]	No_Paralogs	protein_coding	Entire gene
CNVR_10203	23	27688326	27879750	191425	DEL	ENSBTAG00000007075		major histocompatibility complex, class I, A-like precursor [Source:RefSeq peptide;Acc:NP_001193388]	Paralogs	protein_coding	Entire gene
CNVR_10203	23	27688326	27879750	191425	DEL	ENSBTAG00000012208			Paralogs	protein_coding	Entire gene
CNVR_7619	2	5706778	7047584	1340807	DEL	ENSBTAG00000007787	HIBCH	3-hydroxyisobutyryl-CoA hydrolase [Source:HGNC Symbol;Acc:HGNC:4908]	No_Paralogs	protein_coding	Entire gene
CNVR_10895	24	62357251	62447520	90270	CNV	ENSBTAG00000037608	HMSD		No_Paralogs	protein_coding	Entire gene
CNVR_10203	23	27688326	27879750	191425	DEL	ENSBTAG00000021111			Paralogs	protein_coding	Entire gene
CNVR_10897	24	62371952	62387730	15779	DEL	ENSBTAG00000037608	HMSD		No_Paralogs	protein_coding	Entire gene
CNVR_10203	23	27688326	27879750	191425	DEL	ENSBTAG00000022590			Paralogs	protein_coding	Entire gene
CNVR_12945	3	5779846	7464429	1684584	DEL	ENSBTAG00000005976	HSD17B7	hydroxysteroid 17-beta dehydrogenase 7 [Source:HGNC Symbol;Acc:HGNC:5215]	No_Paralogs	protein_coding	Entire gene
CNVR_10203	23	27688326	27879750	191425	DEL	ENSBTAG00000043004	U6	U6 spliceosomal RNA [Source:RFAM;Acc:RF00026]	Paralogs	snRNA	Entire gene
CNVR_10203	23	27688326	27879750	191425	DEL	ENSBTAG00000010166			Paralogs	protein_coding	5' UTR
CNVR_10204	23	27690264	27722421	32158	CNV	ENSBTAG00000012208			Paralogs	protein_coding	3' UTR
CNVR_10204	23	27690264	27722421	32158	CNV	ENSBTAG00000001476			Paralogs	protein_coding	Entire gene
CNVR_10204	23	27690264	27722421	32158	CNV	ENSBTAG00000010166			Paralogs	protein_coding	Intron
CNVR_10262	23	29011026	29083135	72110	DEL	ENSBTAG00000031835			Paralogs	protein_coding	Entire gene
CNVR_10262	23	29011026	29083135	72110	DEL	ENSBTAG00000046892			Paralogs	protein_coding	Entire gene
CNVR_10262	23	29011026	29083135	72110	DEL	ENSBTAG00000047644			Paralogs	protein_coding	Entire gene
CNVR_10262	23	29011026	29083135	72110	DEL	ENSBTAG00000047763			Paralogs	protein_coding	Entire gene
CNVR_10262	23	29011026	29083135	72110	DEL	ENSBTAG00000047829			Paralogs	protein_coding	Entire gene
CNVR_10262	23	29011026	29083135	72110	DEL	ENSBTAG00000048019			Paralogs	protein_coding	Entire gene
CNVR_10263	23	29020904	29106917	86014	DEL	ENSBTAG00000040188			Paralogs	protein_coding	Some exons
CNVR_10263	23	29020904	29106917	86014	DEL	ENSBTAG00000031835			Paralogs	protein_coding	Entire gene
CNVR_10263	23	29020904	29106917	86014	DEL	ENSBTAG00000039390			Paralogs	protein_coding	Entire gene
CNVR_10263	23	29020904	29106917	86014	DEL	ENSBTAG00000046892			Paralogs	protein_coding	Entire gene
CNVR_10263	23	29020904	29106917	86014	DEL	ENSBTAG00000047763			Paralogs	protein_coding	Entire gene
CNVR_10263	23	29020904	29106917	86014	DEL	ENSBTAG00000047829			Paralogs	protein_coding	Entire gene
CNVR_10263	23	29020904	29106917	86014	DEL	ENSBTAG00000048019			Paralogs	protein_coding	Entire gene
CNVR_10264	23	29046487	29122911	76425	DEL	ENSBTAG00000039683			Paralogs	protein_coding	Some exons
CNVR_10264	23	29046487	29122911	76425	DEL	ENSBTAG00000039390			Paralogs	protein_coding	Entire gene
CNVR_10264	23	29046487	29122911	76425	DEL	ENSBTAG00000040188			Paralogs	protein_coding	Entire gene
CNVR_10264	23	29046487	29122911	76425	DEL	ENSBTAG00000046892			Paralogs	protein_coding	Entire gene
CNVR_10264	23	29046487	29122911	76425	DEL	ENSBTAG00000047829			Paralogs	protein_coding	Entire gene
CNVR_10264	23	29046487	29122911	76425	DEL	ENSBTAG00000048019			Paralogs	protein_coding	Entire gene
CNVR_10313	23	30140401	30146000	5600	DEL	ENSBTAG00000045403	SNORA31	Small nucleolar RNA SNORA31 [Source:RFAM;Acc:RF00322]	Paralogs	snoRNA	Entire gene
CNVR_10313	23	30140401	30146000	5600	DEL	ENSBTAG00000046573	PGBD1	piggyBac transposable element derived 1 [Source:HGNC Symbol;Acc:HGNC:19398]	Paralogs	protein_coding	Intron
CNVR_10317	23	30394836	30406000	11165	DEL	ENSBTAG00000038908			Paralogs	protein_coding	Entire gene
CNVR_10336	23	31769549	31770637	1089	DEL	ENSBTAG00000003797	SLC17A3	solute carrier family 17 member 3 [Source:HGNC Symbol;Acc:HGNC:10931]	Paralogs	protein_coding	Intron
CNVR_10349	23	33229378	33230359	982	DEL	ENSBTAG00000009798	DCDC2	doublecortin domain containing 2 [Source:HGNC Symbol;Acc:HGNC:18141]	Paralogs	protein_coding	Intron
CNVR_10359	23	34366276	34401698	35423	DEL	ENSBTAG00000042150	U6	U6 spliceosomal RNA [Source:RFAM;Acc:RF00026]	Paralogs	snRNA	Entire gene
CNVR_10359	23	34366276	34401698	35423	DEL	ENSBTAG00000025304			Paralogs	protein_coding	5' UTR
CNVR_10360	23	34423339	34652686	229348	DEL	ENSBTAG00000047671		Bos taurus prolactin-related protein 2	Paralogs	protein_coding	Some exons
CNVR_10360	23	34423339	34652686	229348	DEL	ENSBTAG00000015827		Placental prolactin-related protein 1 [Source:UniProtKB/Swiss-Prot;Acc:P05402]	Paralogs	protein_coding	Entire gene
CNVR_10360	23	34423339	34652686	229348	DEL	ENSBTAG00000025302			Paralogs	protein_coding	Entire gene
CNVR_10360	23	34423339	34652686	229348	DEL	ENSBTAG00000025314			Paralogs	protein_coding	Entire gene
CNVR_10360	23	34423339	34652686	229348	DEL	ENSBTAG00000038718			Paralogs	protein_coding	Entire gene
CNVR_10360	23	34423339	34652686	229348	DEL	ENSBTAG00000042317	U6	U6 spliceosomal RNA [Source:RFAM;Acc:RF00026]	Paralogs	snRNA	Entire gene
CNVR_10360	23	34423339	34652686	229348	DEL	ENSBTAG00000042344	U6	U6 spliceosomal RNA [Source:RFAM;Acc:RF00026]	Paralogs	snRNA	Entire gene
CNVR_10360	23	34423339	34652686	229348	DEL	ENSBTAG00000043055	U6	U6 spliceosomal RNA [Source:RFAM;Acc:RF00026]	Paralogs	snRNA	Entire gene
CNVR_10360	23	34423339	34652686	229348	DEL	ENSBTAG00000043526	U6	U6 spliceosomal RNA [Source:RFAM;Acc:RF00026]	Paralogs	snRNA	Entire gene
CNVR_10360	23	34423339	34652686	229348	DEL	ENSBTAG00000045324	U6	U6 spliceosomal RNA [Source:RFAM;Acc:RF00026]	Paralogs	snRNA	Entire gene
CNVR_10360	23	34423339	34652686	229348	DEL	ENSBTAG00000046890	U6	U6 spliceosomal RNA [Source:RFAM;Acc:RF00026]	Paralogs	snRNA	Entire gene
CNVR_10360	23	34423339	34652686	229348	DEL	ENSBTAG00000047126	U6	U6 spliceosomal RNA [Source:RFAM;Acc:RF00026]	Paralogs	snRNA	Entire gene
CNVR_10361	23	34436959	34736874	299916	DEL	ENSBTAG00000015827		Placental prolactin-related protein 1 [Source:UniProtKB/Swiss-Prot;Acc:P05402]	Paralogs	protein_coding	Entire gene
CNVR_10361	23	34436959	34736874	299916	DEL	ENSBTAG00000025302			Paralogs	protein_coding	Entire gene
CNVR_10361	23	34436959	34736874	299916	DEL	ENSBTAG00000033513			Paralogs	protein_coding	Entire gene
CNVR_10361	23	34436959	34736874	299916	DEL	ENSBTAG00000033993	PRP14	prolactin-related protein 14 precursor [Source:RefSeq peptide;Acc:NP_001091031]	Paralogs	protein_coding	Entire gene
CNVR_10361	23	34436959	34736874	299916	DEL	ENSBTAG00000036106			Paralogs	protein_coding	Entire gene
CNVR_10361	23	34436959	34736874	299916	DEL	ENSBTAG00000038718			Paralogs	protein_coding	Entire gene
CNVR_10361	23	34436959	34736874	299916	DEL	ENSBTAG00000042317	U6	U6 spliceosomal RNA [Source:RFAM;Acc:RF00026]	Paralogs	snRNA	Entire gene
CNVR_10361	23	34436959	34736874	299916	DEL	ENSBTAG00000042344	U6	U6 spliceosomal RNA [Source:RFAM;Acc:RF00026]	Paralogs	snRNA	Entire gene
CNVR_10361	23	34436959	34736874	299916	DEL	ENSBTAG00000042886	U6	U6 spliceosomal RNA [Source:RFAM;Acc:RF00026]	Paralogs	snRNA	Entire gene
CNVR_10361	23	34436959	34736874	299916	DEL	ENSBTAG00000043055	U6	U6 spliceosomal RNA [Source:RFAM;Acc:RF00026]	Paralogs	snRNA	Entire gene
CNVR_10361	23	34436959	34736874	299916	DEL	ENSBTAG00000043526	U6	U6 spliceosomal RNA [Source:RFAM;Acc:RF00026]	Paralogs	snRNA	Entire gene
CNVR_10361	23	34436959	34736874	299916	DEL	ENSBTAG00000045324	U6	U6 spliceosomal RNA [Source:RFAM;Acc:RF00026]	Paralogs	snRNA	Entire gene
CNVR_10361	23	34436959	34736874	299916	DEL	ENSBTAG00000046890	U6	U6 spliceosomal RNA [Source:RFAM;Acc:RF00026]	Paralogs	snRNA	Entire gene
CNVR_10361	23	34436959	34736874	299916	DEL	ENSBTAG00000047057	U6	U6 spliceosomal RNA [Source:RFAM;Acc:RF00026]	Paralogs	snRNA	Entire gene
CNVR_10361	23	34436959	34736874	299916	DEL	ENSBTAG00000047117	U6	U6 spliceosomal RNA [Source:RFAM;Acc:RF00026]	Paralogs	snRNA	Entire gene
CNVR_10361	23	34436959	34736874	299916	DEL	ENSBTAG00000047126	U6	U6 spliceosomal RNA [Source:RFAM;Acc:RF00026]	Paralogs	snRNA	Entire gene
CNVR_10361	23	34436959	34736874	299916	DEL	ENSBTAG00000047671		Bos taurus prolactin-related protein 2	Paralogs	protein_coding	Entire gene
CNVR_10361	23	34436959	34736874	299916	DEL	ENSBTAG00000025314			Paralogs	protein_coding	5' UTR
CNVR_10444	23	47373237	47418550	45314	DUP	ENSBTAG00000019234	BMP6	bone morphogenetic protein 6 [Source:HGNC Symbol;Acc:HGNC:1073]	Paralogs	protein_coding	Some exons
CNVR_10464	23	50533573	50571068	37496	DEL	ENSBTAG00000017949			Paralogs	protein_coding	Entire gene
CNVR_10464	23	50533573	50571068	37496	DEL	ENSBTAG00000042636	U6	U6 spliceosomal RNA [Source:RFAM;Acc:RF00026]	Paralogs	snRNA	Entire gene
CNVR_10512	24	4379765	4380641	877	DEL	ENSBTAG00000022466	C18orf63	chromosome 18 open reading frame 63 [Source:HGNC Symbol;Acc:HGNC:40037]	No_Paralogs	protein_coding	Intron
CNVR_10550	24	7700587	7701490	904	DEL	ENSBTAG00000046957	DOK6	docking protein 6 [Source:HGNC Symbol;Acc:HGNC:28301]	Paralogs	protein_coding	Intron
CNVR_10551	24	8046251	8050750	4500	DEL	ENSBTAG00000046957	DOK6	docking protein 6 [Source:HGNC Symbol;Acc:HGNC:28301]	Paralogs	protein_coding	Intron
CNVR_10566	24	10485707	10487158	1452	DEL	ENSBTAG00000023270	CDH19	cadherin 19 [Source:HGNC Symbol;Acc:HGNC:1758]	Paralogs	protein_coding	Intron
CNVR_10601	24	13077001	13082500	5500	DEL	ENSBTAG00000045568			No_Paralogs	pseudogene	Entire gene
CNVR_10625	24	14627727	14628357	631	DEL	ENSBTAG00000045111	snoU54	Small nucleolar RNA U54 [Source:RFAM;Acc:RF01277]	Paralogs	snoRNA	Entire gene
CNVR_10663	24	19985944	19987863	1920	DEL	ENSBTAG00000004940	CELF4	CUGBP Elav-like family member 4 [Source:HGNC Symbol;Acc:HGNC:14015]	Paralogs	protein_coding	Intron
CNVR_10672	24	22679798	22680504	707	DEL	ENSBTAG00000012307	DTNA	dystrobrevin alpha [Source:HGNC Symbol;Acc:HGNC:3057]	Paralogs	protein_coding	Intron
CNVR_10673	24	22679962	22680497	536	DEL	ENSBTAG00000012307	DTNA	dystrobrevin alpha [Source:HGNC Symbol;Acc:HGNC:3057]	Paralogs	protein_coding	Intron
CNVR_10682	24	24725501	24727018	1518	DEL	ENSBTAG00000020003	KLHL14	kelch like family member 14 [Source:HGNC Symbol;Acc:HGNC:29266]	Paralogs	protein_coding	Intron
CNVR_10690	24	25571001	25621046	50046	DEL	ENSBTAG00000007696			Paralogs	protein_coding	Some exons
CNVR_10690	24	25571001	25621046	50046	DEL	ENSBTAG00000039296			Paralogs	protein_coding	3' UTR
CNVR_10729	24	30245341	30246131	791	DEL	ENSBTAG00000014082	CHST9	carbohydrate sulfotransferase 9 [Source:HGNC Symbol;Acc:HGNC:19898]	Paralogs	protein_coding	Intron
CNVR_10743	24	33763501	33768000	4500	DEL	ENSBTAG00000008705	CABLES1		Paralogs	protein_coding	Intron
CNVR_10791	24	43886830	43888286	1457	DEL	ENSBTAG00000009139	LDLRAD4	low density lipoprotein receptor class A domain containing 4 [Source:HGNC Symbol;Acc:HGNC:1224]	Paralogs	protein_coding	Intron
CNVR_10814	24	49369718	49376000	6283	DEL	ENSBTAG00000000024	DYM	dymeclin [Source:HGNC Symbol;Acc:HGNC:21317]	No_Paralogs	protein_coding	Intron
CNVR_10855	24	57151906	57889075	737170	DEL	ENSBTAG00000005738	ATP8B1	ATPase phospholipid transporting 8B1 [Source:HGNC Symbol;Acc:HGNC:3706]	Paralogs	protein_coding	Entire gene
CNVR_3138	12	61174243	64062659	2888417	DEL	ENSBTAG00000032711	HTATSF1	HIV Tat-specific factor 1 [Source:RefSeq peptide;Acc:NP_001193343]	No_Paralogs	protein_coding	Entire gene
CNVR_10855	24	57151906	57889075	737170	DEL	ENSBTAG00000019271			Paralogs	protein_coding	Entire gene
CNVR_10855	24	57151906	57889075	737170	DEL	ENSBTAG00000022819	ONECUT2	one cut homeobox 2 [Source:HGNC Symbol;Acc:HGNC:8139]	Paralogs	protein_coding	Entire gene
CNVR_10855	24	57151906	57889075	737170	DEL	ENSBTAG00000042835	U6	U6 spliceosomal RNA [Source:RFAM;Acc:RF00026]	Paralogs	snRNA	Entire gene
CNVR_10855	24	57151906	57889075	737170	DEL	ENSBTAG00000045186	U6	U6 spliceosomal RNA [Source:RFAM;Acc:RF00026]	Paralogs	snRNA	Entire gene
CNVR_10855	24	57151906	57889075	737170	DEL	ENSBTAG00000046411	5S_rRNA	5S ribosomal RNA [Source:RFAM;Acc:RF00001]	Paralogs	rRNA	Entire gene
CNVR_10881	24	60565243	60566221	979	DEL	ENSBTAG00000001739	CDH20	cadherin 20 [Source:HGNC Symbol;Acc:HGNC:1760]	Paralogs	protein_coding	Intron
CNVR_10890	24	62267923	62268726	804	DEL	ENSBTAG00000002019	SERPINB5	serpin family B member 5 [Source:HGNC Symbol;Acc:HGNC:8949]	Paralogs	protein_coding	Intron
CNVR_10895	24	62357251	62447520	90270	CNV	ENSBTAG00000035224			Paralogs	protein_coding	Some exons
CNVR_10895	24	62357251	62447520	90270	CNV	ENSBTAG00000040586		serpin peptidase inhibitor, clade B like [Source:RefSeq peptide;Acc:NP_001099089]	Paralogs	protein_coding	Some exons
CNVR_10895	24	62357251	62447520	90270	CNV	ENSBTAG00000037554			Paralogs	protein_coding	Entire gene
CNVR_16493	6	108528487	109317393	788907	DEL	ENSBTAG00000007002	IDUA	iduronidase, alpha-L- [Source:HGNC Symbol;Acc:HGNC:5391]	No_Paralogs	protein_coding	Entire gene
CNVR_10895	24	62357251	62447520	90270	CNV	ENSBTAG00000039037		Bos taurus serpin peptidase inhibitor, clade B like	Paralogs	protein_coding	Entire gene
CNVR_8480	2	134411207	135715574	1304368	DEL	ENSBTAG00000019172	IGSF21	immunoglobin superfamily member 21 [Source:HGNC Symbol;Acc:HGNC:28246]	No_Paralogs	protein_coding	Entire gene
CNVR_10897	24	62371952	62387730	15779	DEL	ENSBTAG00000039037		Bos taurus serpin peptidase inhibitor, clade B like	Paralogs	protein_coding	5' UTR
CNVR_10904	24	62442251	62444400	2150	DEL	ENSBTAG00000035224			Paralogs	protein_coding	Intron
CNVR_10904	24	62442251	62444400	2150	DEL	ENSBTAG00000040586		serpin peptidase inhibitor, clade B like [Source:RefSeq peptide;Acc:NP_001099089]	Paralogs	protein_coding	Intron
CNVR_10906	24	62624241	62624975	735	DEL	ENSBTAG00000001102	SERPINB10	serpin family B member 10 [Source:HGNC Symbol;Acc:HGNC:8942]	Paralogs	protein_coding	Some exons
CNVR_10912	25	1894879	1895463	585	DUP	ENSBTAG00000034643			Paralogs	protein_coding	Intron
CNVR_10913	25	1907449	1912209	4761	DEL	ENSBTAG00000034643			Paralogs	protein_coding	Intron
CNVR_10965	25	9795501	9796295	795	DEL	ENSBTAG00000005208	CLEC16A	C-type lectin domain containing 16A [Source:HGNC Symbol;Acc:HGNC:29013]	No_Paralogs	protein_coding	Intron
CNVR_10968	25	11194893	11196250	1358	DEL	ENSBTAG00000026371	SNX29	sorting nexin-29 [Source:RefSeq peptide;Acc:NP_001070330]	No_Paralogs	protein_coding	Intron
CNVR_10980	25	13255201	13257063	1863	DEL	ENSBTAG00000008728	MKL2	MKL1/myocardin like 2 [Source:HGNC Symbol;Acc:HGNC:29819]	Paralogs	protein_coding	Intron
CNVR_10999	25	17729701	17732000	2300	DEL	ENSBTAG00000046240			No_Paralogs	miRNA	Entire gene
CNVR_11007	25	19092634	19093382	749	DEL	ENSBTAG00000018560	DNAH3	dynein axonemal heavy chain 3 [Source:HGNC Symbol;Acc:HGNC:2949]	Paralogs	protein_coding	Intron
CNVR_11010	25	19381089	19382750	1662	DEL	ENSBTAG00000006717			Paralogs	protein_coding	Intron
CNVR_11018	25	20968443	20968908	466	DEL	ENSBTAG00000011744	USP31	ubiquitin specific peptidase 31 [Source:HGNC Symbol;Acc:HGNC:20060]	Paralogs	protein_coding	Intron
CNVR_11044	25	27661769	27723090	61322	DEL	ENSBTAG00000019524	ITGAD	integrin subunit alpha D [Source:HGNC Symbol;Acc:HGNC:6146]	Paralogs	protein_coding	Some exons
CNVR_11047	25	27851751	27854345	2595	DEL	ENSBTAG00000009327	SEPT14	septin 14 [Source:HGNC Symbol;Acc:HGNC:33280]	Paralogs	protein_coding	Intron
CNVR_11058	25	28951536	28952278	743	DEL	ENSBTAG00000043969	CALN1	calcium-binding protein 8 [Source:RefSeq peptide;Acc:NP_001193044]	Paralogs	protein_coding	Intron
CNVR_11096	25	36687974	36689629	1656	DEL	ENSBTAG00000001066		paired immunoglobulin-like type 2 receptor alpha precursor [Source:RefSeq peptide;Acc:NP_001193279]	Paralogs	protein_coding	Intron
CNVR_11097	25	36799851	36833489	33639	DEL	ENSBTAG00000011470			Paralogs	protein_coding	Entire gene
CNVR_11138	26	790905	792059	1155	DEL	ENSBTAG00000011197	IPMK	inositol polyphosphate multikinase [Source:HGNC Symbol;Acc:HGNC:20739]	Paralogs	protein_coding	Intron
CNVR_11191	26	3961353	4027414	66062	DEL	ENSBTAG00000048299			No_Paralogs	miRNA	Entire gene
CNVR_11193	26	3962702	4699757	737056	DEL	ENSBTAG00000047692			No_Paralogs	miRNA	Entire gene
CNVR_11193	26	3962702	4699757	737056	DEL	ENSBTAG00000048299			No_Paralogs	miRNA	Entire gene
CNVR_11219	26	5226220	5235000	8781	DEL	ENSBTAG00000045905	PCDH15	protocadherin related 15 [Source:HGNC Symbol;Acc:HGNC:14674]	Paralogs	protein_coding	Intron
CNVR_11223	26	5481001	5483137	2137	DEL	ENSBTAG00000045905	PCDH15	protocadherin related 15 [Source:HGNC Symbol;Acc:HGNC:14674]	Paralogs	protein_coding	Intron
CNVR_11224	26	5498569	5499437	869	DEL	ENSBTAG00000045905	PCDH15	protocadherin related 15 [Source:HGNC Symbol;Acc:HGNC:14674]	Paralogs	protein_coding	Intron
CNVR_11226	26	5517164	5518268	1105	DEL	ENSBTAG00000045905	PCDH15	protocadherin related 15 [Source:HGNC Symbol;Acc:HGNC:14674]	Paralogs	protein_coding	Intron
CNVR_11233	26	5716281	5718384	2104	DEL	ENSBTAG00000039406			No_Paralogs	processed_pseudogene	Entire gene
CNVR_11253	26	7088668	7090723	2056	DEL	ENSBTAG00000018404	PRKG1	protein kinase, cGMP-dependent, type I [Source:HGNC Symbol;Acc:HGNC:9414]	Paralogs	protein_coding	Intron
CNVR_11256	26	7277125	7279320	2196	DEL	ENSBTAG00000018404	PRKG1	protein kinase, cGMP-dependent, type I [Source:HGNC Symbol;Acc:HGNC:9414]	Paralogs	protein_coding	Intron
CNVR_11259	26	7778877	7779718	842	DEL	ENSBTAG00000018404	PRKG1	protein kinase, cGMP-dependent, type I [Source:HGNC Symbol;Acc:HGNC:9414]	Paralogs	protein_coding	Intron
CNVR_11260	26	7959282	7964750	5469	DEL	ENSBTAG00000018404	PRKG1	protein kinase, cGMP-dependent, type I [Source:HGNC Symbol;Acc:HGNC:9414]	Paralogs	protein_coding	Intron
CNVR_11261	26	8118527	8120135	1609	DEL	ENSBTAG00000018404	PRKG1	protein kinase, cGMP-dependent, type I [Source:HGNC Symbol;Acc:HGNC:9414]	Paralogs	protein_coding	Intron
CNVR_11283	26	10956967	10982868	25902	DEL	ENSBTAG00000011115	CH25H	cholesterol 25-hydroxylase [Source:HGNC Symbol;Acc:HGNC:1907]	Paralogs	protein_coding	Entire gene
CNVR_11294	26	12250086	12251425	1340	DEL	ENSBTAG00000034597			Paralogs	protein_coding	Some exons
CNVR_11309	26	14841587	14844220	2634	DEL	ENSBTAG00000016918	MYOF	myoferlin [Source:HGNC Symbol;Acc:HGNC:3656]	Paralogs	protein_coding	Intron
CNVR_11325	26	17396993	17398032	1040	DEL	ENSBTAG00000021358	BLNK	B-cell linker [Source:HGNC Symbol;Acc:HGNC:14211]	Paralogs	protein_coding	Intron
CNVR_11328	26	17551071	17551743	673	DEL	ENSBTAG00000011740	OPALIN	oligodendrocytic myelin paranodal and inner loop protein [Source:HGNC Symbol;Acc:HGNC:20707]	No_Paralogs	protein_coding	Intron
CNVR_11329	26	17551079	17551707	629	DEL	ENSBTAG00000011740	OPALIN	oligodendrocytic myelin paranodal and inner loop protein [Source:HGNC Symbol;Acc:HGNC:20707]	No_Paralogs	protein_coding	Intron
CNVR_11339	26	19342556	19343080	525	DEL	ENSBTAG00000014313	PYROXD2	pyridine nucleotide-disulphide oxidoreductase domain 2 [Source:HGNC Symbol;Acc:HGNC:23517]	No_Paralogs	protein_coding	Intron
CNVR_11354	26	23643120	23651845	8726	DEL	ENSBTAG00000004318	ARL3	ADP-ribosylation factor-like protein 3 [Source:RefSeq peptide;Acc:NP_001033656]	Paralogs	protein_coding	Intron
CNVR_11356	26	23664789	23694353	29565	DEL	ENSBTAG00000014336	WBP1L	WW domain binding protein 1 like [Source:HGNC Symbol;Acc:HGNC:23510]	Paralogs	protein_coding	Entire gene
CNVR_11356	26	23664789	23694353	29565	DEL	ENSBTAG00000004318	ARL3	ADP-ribosylation factor-like protein 3 [Source:RefSeq peptide;Acc:NP_001033656]	Paralogs	protein_coding	Intron
CNVR_11392	26	27921452	27922236	785	DEL	ENSBTAG00000007948	SORCS1	sortilin related VPS10 domain containing receptor 1 [Source:HGNC Symbol;Acc:HGNC:16697]	Paralogs	protein_coding	Intron
CNVR_11396	26	28339608	28341388	1781	DEL	ENSBTAG00000007948	SORCS1	sortilin related VPS10 domain containing receptor 1 [Source:HGNC Symbol;Acc:HGNC:16697]	Paralogs	protein_coding	Intron
CNVR_11429	26	31582616	31583532	917	DEL	ENSBTAG00000023891	RBM20	RNA binding motif protein 20 [Source:HGNC Symbol;Acc:HGNC:27424]	Paralogs	protein_coding	Intron
CNVR_11445	26	34502838	34503686	849	DEL	ENSBTAG00000011487	PLEKHS1	pleckstrin homology domain-containing family S member 1 [Source:RefSeq peptide;Acc:NP_001193487]	No_Paralogs	protein_coding	Intron
CNVR_11480	26	42789490	42793590	4101	DEL	ENSBTAG00000022715	DMBT1		Paralogs	protein_coding	Some exons
CNVR_11481	26	42790411	42792255	1845	DEL	ENSBTAG00000022715	DMBT1		Paralogs	protein_coding	Some exons
CNVR_11482	26	42795788	42798905	3118	DEL	ENSBTAG00000022715	DMBT1		Paralogs	protein_coding	Some exons
CNVR_11489	26	43767580	43769114	1535	DEL	ENSBTAG00000031955	GPR26	G protein-coupled receptor 26 [Source:HGNC Symbol;Acc:HGNC:4481]	No_Paralogs	protein_coding	Intron
CNVR_11500	26	45750490	45751827	1338	DEL	ENSBTAG00000022917	FANK1	fibronectin type III and ankyrin repeat domains 1 [Source:HGNC Symbol;Acc:HGNC:23527]	Paralogs	protein_coding	Intron
CNVR_11502	26	46180305	46180859	555	DEL	ENSBTAG00000012444	ADAM12	ADAM metallopeptidase domain 12 [Source:HGNC Symbol;Acc:HGNC:190]	Paralogs	protein_coding	Intron
CNVR_11506	26	46842407	46843088	682	DEL	ENSBTAG00000031890	DOCK1	dedicator of cytokinesis 1 [Source:HGNC Symbol;Acc:HGNC:2987]	Paralogs	protein_coding	Intron
CNVR_11509	26	46961464	46962163	700	DEL	ENSBTAG00000031890	DOCK1	dedicator of cytokinesis 1 [Source:HGNC Symbol;Acc:HGNC:2987]	Paralogs	protein_coding	Intron
CNVR_11533	26	50590538	50624847	34310	DUP	ENSBTAG00000046929	5S_rRNA	5S ribosomal RNA [Source:RFAM;Acc:RF00001]	Paralogs	rRNA	Entire gene
CNVR_11547	27	260378	261222	845	DEL	ENSBTAG00000008585	ARHGEF10	Rho guanine nucleotide exchange factor 10 [Source:HGNC Symbol;Acc:HGNC:14103]	Paralogs	protein_coding	Intron
CNVR_11551	27	1345920	1347393	1474	DEL	ENSBTAG00000009739	CSMD1	CUB and Sushi multiple domains 1 [Source:HGNC Symbol;Acc:HGNC:14026]	Paralogs	protein_coding	Intron
CNVR_11591	27	5175812	5296417	120606	DEL	ENSBTAG00000039856			Paralogs	protein_coding	Entire gene
CNVR_11591	27	5175812	5296417	120606	DEL	ENSBTAG00000046144	DEFB7	Bos taurus defensin beta 7	Paralogs	protein_coding	Entire gene
CNVR_11591	27	5175812	5296417	120606	DEL	ENSBTAG00000047740			Paralogs	protein_coding	Entire gene
CNVR_11596	27	5255497	5953680	698184	CNV	ENSBTAG00000010248			Paralogs	protein_coding	Entire gene
CNVR_11596	27	5255497	5953680	698184	CNV	ENSBTAG00000023157			Paralogs	protein_coding	Entire gene
CNVR_11596	27	5255497	5953680	698184	CNV	ENSBTAG00000033545		Enteric beta-defensin [Source:UniProtKB/Swiss-Prot;Acc:O02775]	Paralogs	protein_coding	Entire gene
CNVR_11596	27	5255497	5953680	698184	CNV	ENSBTAG00000034954		Beta-defensin 5 [Source:UniProtKB/Swiss-Prot;Acc:P46163]	Paralogs	protein_coding	Entire gene
CNVR_11596	27	5255497	5953680	698184	CNV	ENSBTAG00000045649			No_Paralogs	protein_coding	Entire gene
CNVR_11596	27	5255497	5953680	698184	CNV	ENSBTAG00000046405			No_Paralogs	protein_coding	Entire gene
CNVR_11596	27	5255497	5953680	698184	CNV	ENSBTAG00000047284			Paralogs	protein_coding	Entire gene
CNVR_11596	27	5255497	5953680	698184	CNV	ENSBTAG00000047363			No_Paralogs	protein_coding	Entire gene
CNVR_11596	27	5255497	5953680	698184	CNV	ENSBTAG00000048249			No_Paralogs	protein_coding	Entire gene
CNVR_11597	27	5279835	6464573	1184739	DEL	ENSBTAG00000004231	GPM6A	glycoprotein M6A [Source:HGNC Symbol;Acc:HGNC:4460]	Paralogs	protein_coding	Entire gene
CNVR_11597	27	5279835	6464573	1184739	DEL	ENSBTAG00000010248			Paralogs	protein_coding	Entire gene
CNVR_11597	27	5279835	6464573	1184739	DEL	ENSBTAG00000023157			Paralogs	protein_coding	Entire gene
CNVR_11597	27	5279835	6464573	1184739	DEL	ENSBTAG00000033545		Enteric beta-defensin [Source:UniProtKB/Swiss-Prot;Acc:O02775]	Paralogs	protein_coding	Entire gene
CNVR_11597	27	5279835	6464573	1184739	DEL	ENSBTAG00000034954		Beta-defensin 5 [Source:UniProtKB/Swiss-Prot;Acc:P46163]	Paralogs	protein_coding	Entire gene
CNVR_11597	27	5279835	6464573	1184739	DEL	ENSBTAG00000035183			Paralogs	protein_coding	Entire gene
CNVR_11597	27	5279835	6464573	1184739	DEL	ENSBTAG00000038504			Paralogs	protein_coding	Entire gene
CNVR_11597	27	5279835	6464573	1184739	DEL	ENSBTAG00000045649			No_Paralogs	protein_coding	Entire gene
CNVR_11597	27	5279835	6464573	1184739	DEL	ENSBTAG00000046405			No_Paralogs	protein_coding	Entire gene
CNVR_11597	27	5279835	6464573	1184739	DEL	ENSBTAG00000047284			Paralogs	protein_coding	Entire gene
CNVR_11597	27	5279835	6464573	1184739	DEL	ENSBTAG00000047363			No_Paralogs	protein_coding	Entire gene
CNVR_11597	27	5279835	6464573	1184739	DEL	ENSBTAG00000048249			No_Paralogs	protein_coding	Entire gene
CNVR_11609	27	5503854	5556195	52342	DEL	ENSBTAG00000033545		Enteric beta-defensin [Source:UniProtKB/Swiss-Prot;Acc:O02775]	Paralogs	protein_coding	5' UTR
CNVR_11676	27	10742343	15979016	5236674	DEL	ENSBTAG00000000957	CDKN2AIP	CDKN2A-interacting protein [Source:RefSeq peptide;Acc:NP_001039608]	Paralogs	protein_coding	Entire gene
CNVR_3635	13	10960139	17846162	6886024	DEL	ENSBTAG00000006078	IL15RA		No_Paralogs	protein_coding	Entire gene
CNVR_11676	27	10742343	15979016	5236674	DEL	ENSBTAG00000003572	F11	coagulation factor XI [Source:HGNC Symbol;Acc:HGNC:3529]	Paralogs	protein_coding	Entire gene
CNVR_11676	27	10742343	15979016	5236674	DEL	ENSBTAG00000004344	ACSL1	acyl-CoA synthetase long-chain family member 1 [Source:HGNC Symbol;Acc:HGNC:3569]	Paralogs	protein_coding	Entire gene
CNVR_3635	13	10960139	17846162	6886024	DEL	ENSBTAG00000020892	IL2RA	interleukin 2 receptor subunit alpha [Source:HGNC Symbol;Acc:HGNC:6008]	No_Paralogs	protein_coding	Entire gene
CNVR_11676	27	10742343	15979016	5236674	DEL	ENSBTAG00000006046			No_Paralogs	pseudogene	Entire gene
CNVR_7619	2	5706778	7047584	1340807	DEL	ENSBTAG00000007584	INPP1	inositol polyphosphate-1-phosphatase [Source:HGNC Symbol;Acc:HGNC:6071]	No_Paralogs	protein_coding	Entire gene
CNVR_11676	27	10742343	15979016	5236674	DEL	ENSBTAG00000008682	TLR3	toll like receptor 3 [Source:HGNC Symbol;Acc:HGNC:11849]	Paralogs	protein_coding	Entire gene
CNVR_11676	27	10742343	15979016	5236674	DEL	ENSBTAG00000008886	STOX2	storkhead box 2 [Source:HGNC Symbol;Acc:HGNC:25450]	Paralogs	protein_coding	Entire gene
CNVR_11676	27	10742343	15979016	5236674	DEL	ENSBTAG00000009501	KLKB1	kallikrein B1 [Source:HGNC Symbol;Acc:HGNC:6371]	Paralogs	protein_coding	Entire gene
CNVR_11676	27	10742343	15979016	5236674	DEL	ENSBTAG00000010002	IRF2	interferon regulatory factor 2 [Source:HGNC Symbol;Acc:HGNC:6117]	Paralogs	protein_coding	Entire gene
CNVR_11676	27	10742343	15979016	5236674	DEL	ENSBTAG00000010351	SNX25	sorting nexin-25 [Source:RefSeq peptide;Acc:NP_001179687]	Paralogs	protein_coding	Entire gene
CNVR_11676	27	10742343	15979016	5236674	DEL	ENSBTAG00000011573	ENPP6	ectonucleotide pyrophosphatase/phosphodiesterase 6 [Source:HGNC Symbol;Acc:HGNC:23409]	Paralogs	protein_coding	Entire gene
CNVR_11676	27	10742343	15979016	5236674	DEL	ENSBTAG00000012191	WWC2	WW and C2 domain containing 2 [Source:HGNC Symbol;Acc:HGNC:24148]	Paralogs	protein_coding	Entire gene
CNVR_11676	27	10742343	15979016	5236674	DEL	ENSBTAG00000012207			Paralogs	protein_coding	Entire gene
CNVR_11676	27	10742343	15979016	5236674	DEL	ENSBTAG00000012209			Paralogs	protein_coding	Entire gene
CNVR_11676	27	10742343	15979016	5236674	DEL	ENSBTAG00000013208	SLC25A4	solute carrier family 25 member 4 [Source:HGNC Symbol;Acc:HGNC:10990]	Paralogs	protein_coding	Entire gene
CNVR_6730	18	15506516	21364612	5858097	DEL	ENSBTAG00000004805	ITFG1	integrin alpha FG-GAP repeat containing 1 [Source:HGNC Symbol;Acc:HGNC:30697]	No_Paralogs	protein_coding	Entire gene
CNVR_11676	27	10742343	15979016	5236674	DEL	ENSBTAG00000014704	HELT	helt bHLH transcription factor [Source:HGNC Symbol;Acc:HGNC:33783]	Paralogs	protein_coding	Entire gene
CNVR_11676	27	10742343	15979016	5236674	DEL	ENSBTAG00000015874	CASP3	caspase 3 [Source:HGNC Symbol;Acc:HGNC:1504]	Paralogs	protein_coding	Entire gene
CNVR_11676	27	10742343	15979016	5236674	DEL	ENSBTAG00000016486	SORBS2		Paralogs	protein_coding	Entire gene
CNVR_3635	13	10960139	17846162	6886024	DEL	ENSBTAG00000013925	KIN	Kin17 DNA and RNA binding protein [Source:HGNC Symbol;Acc:HGNC:6327]	No_Paralogs	protein_coding	Entire gene
CNVR_11676	27	10742343	15979016	5236674	DEL	ENSBTAG00000017183	PDLIM3	PDZ and LIM domain 3 [Source:HGNC Symbol;Acc:HGNC:20767]	Paralogs	protein_coding	Entire gene
CNVR_11676	27	10742343	15979016	5236674	DEL	ENSBTAG00000018453	ANKRD37	ankyrin repeat domain 37 [Source:HGNC Symbol;Acc:HGNC:29593]	Paralogs	protein_coding	Entire gene
CNVR_11676	27	10742343	15979016	5236674	DEL	ENSBTAG00000018454	UFSP2	UFM1 specific peptidase 2 [Source:HGNC Symbol;Acc:HGNC:25640]	Paralogs	protein_coding	Entire gene
CNVR_15060	5	47901746	47905186	3441	DEL	ENSBTAG00000002004	LLPH	LLP homolog, long-term synaptic facilitation [Source:HGNC Symbol;Acc:HGNC:28229]	No_Paralogs	protein_coding	Some exons
CNVR_11676	27	10742343	15979016	5236674	DEL	ENSBTAG00000005094	LRP2BP	LRP2 binding protein [Source:HGNC Symbol;Acc:HGNC:25434]	No_Paralogs	protein_coding	Entire gene
CNVR_2196	11	27849112	31324038	3474927	DEL	ENSBTAG00000003358	MCFD2	multiple coagulation factor deficiency 2 [Source:HGNC Symbol;Acc:HGNC:18451]	No_Paralogs	protein_coding	Entire gene
CNVR_11676	27	10742343	15979016	5236674	DEL	ENSBTAG00000020657	FAT1	protocadherin Fat 1 precursor [Source:RefSeq peptide;Acc:NP_001179921]	Paralogs	protein_coding	Entire gene
CNVR_11676	27	10742343	15979016	5236674	DEL	ENSBTAG00000021133	TENM3	teneurin-3 [Source:RefSeq peptide;Acc:NP_001192236]	Paralogs	protein_coding	Entire gene
CNVR_11676	27	10742343	15979016	5236674	DEL	ENSBTAG00000021263	CYP4V2	cytochrome P450 family 4 subfamily V member 2 [Source:HGNC Symbol;Acc:HGNC:23198]	Paralogs	protein_coding	Entire gene
CNVR_11676	27	10742343	15979016	5236674	DEL	ENSBTAG00000034393	FAM149A		Paralogs	protein_coding	Entire gene
CNVR_7994	2	61833601	61835670	2070	DEL	ENSBTAG00000015172	MCM6	minichromosome maintenance complex component 6 [Source:HGNC Symbol;Acc:HGNC:6949]	No_Paralogs	protein_coding	Some exons
CNVR_11676	27	10742343	15979016	5236674	DEL	ENSBTAG00000046938	MTNR1A	melatonin receptor 1A [Source:HGNC Symbol;Acc:HGNC:7463]	Paralogs	protein_coding	Entire gene
CNVR_11676	27	10742343	15979016	5236674	DEL	ENSBTAG00000047427	7SK	7SK RNA [Source:RFAM;Acc:RF00100]	Paralogs	misc_RNA	Entire gene
CNVR_11676	27	10742343	15979016	5236674	DEL	ENSBTAG00000047706	ING2	inhibitor of growth family member 2 [Source:HGNC Symbol;Acc:HGNC:6063]	Paralogs	protein_coding	Entire gene
CNVR_11676	27	10742343	15979016	5236674	DEL	ENSBTAG00000047749	VWDE		Paralogs	protein_coding	Entire gene
CNVR_11689	27	12357001	12359750	2750	DEL	ENSBTAG00000047749	VWDE		Paralogs	protein_coding	Some exons
CNVR_11771	27	23713902	26384172	2670271	DUP	ENSBTAG00000021592	WRN	Bos taurus Werner syndrome, RecQ helicase-like	Paralogs	protein_coding	Some exons
CNVR_11771	27	23713902	26384172	2670271	DUP	ENSBTAG00000000743	MBOAT4	membrane bound O-acyltransferase domain containing 4 [Source:HGNC Symbol;Acc:HGNC:32311]	Paralogs	protein_coding	Entire gene
CNVR_5227	15	59072695	59660475	587781	DEL	ENSBTAG00000003361	METTL15	methyltransferase like 15 [Source:HGNC Symbol;Acc:HGNC:26606]	No_Paralogs	protein_coding	Some exons
CNVR_11771	27	23713902	26384172	2670271	DUP	ENSBTAG00000001463	TNKS	tankyrase [Source:HGNC Symbol;Acc:HGNC:11941]	Paralogs	protein_coding	Entire gene
CNVR_13877	4	12871015	18058404	5187390	DEL	ENSBTAG00000013781	MIOS	meiosis regulator for oocyte development [Source:HGNC Symbol;Acc:HGNC:21905]	No_Paralogs	protein_coding	Entire gene
CNVR_11771	27	23713902	26384172	2670271	DUP	ENSBTAG00000006562			No_Paralogs	pseudogene	Entire gene
CNVR_12886	3	702501	773700	71200	DUP	ENSBTAG00000020968	MPC2	mitochondrial pyruvate carrier 2 [Source:HGNC Symbol;Acc:HGNC:24515]	No_Paralogs	protein_coding	Some exons
CNVR_11771	27	23713902	26384172	2670271	DUP	ENSBTAG00000007115	GSR	glutathione-disulfide reductase [Source:HGNC Symbol;Acc:HGNC:4623]	Paralogs	protein_coding	Entire gene
CNVR_11771	27	23713902	26384172	2670271	DUP	ENSBTAG00000009245	PPP2CB	protein phosphatase 2 catalytic subunit beta [Source:HGNC Symbol;Acc:HGNC:9300]	Paralogs	protein_coding	Entire gene
CNVR_11771	27	23713902	26384172	2670271	DUP	ENSBTAG00000009685			Paralogs	protein_coding	Entire gene
CNVR_11771	27	23713902	26384172	2670271	DUP	ENSBTAG00000010606	PPP1R3B	protein phosphatase 1 regulatory subunit 3B [Source:HGNC Symbol;Acc:HGNC:14942]	Paralogs	protein_coding	Entire gene
CNVR_2196	11	27849112	31324038	3474927	DEL	ENSBTAG00000002742	MSH2	mutS homolog 2 [Source:HGNC Symbol;Acc:HGNC:7325]	No_Paralogs	protein_coding	Entire gene
CNVR_2196	11	27849112	31324038	3474927	DEL	ENSBTAG00000001424	MSH6	mutS homolog 6 [Source:HGNC Symbol;Acc:HGNC:7329]	No_Paralogs	protein_coding	Entire gene
CNVR_11771	27	23713902	26384172	2670271	DUP	ENSBTAG00000013581	LEPROTL1	leptin receptor overlapping transcript-like 1 [Source:HGNC Symbol;Acc:HGNC:6555]	Paralogs	protein_coding	Entire gene
CNVR_11771	27	23713902	26384172	2670271	DUP	ENSBTAG00000015913	MFHAS1	malignant fibrous histiocytoma amplified sequence 1 [Source:HGNC Symbol;Acc:HGNC:16982]	Paralogs	protein_coding	Entire gene
CNVR_1817	10	70012179	70014416	2238	DEL	ENSBTAG00000012998	NAA30	N(alpha)-acetyltransferase 30, NatC catalytic subunit [Source:HGNC Symbol;Acc:HGNC:19844]	No_Paralogs	protein_coding	Some exons
CNVR_11771	27	23713902	26384172	2670271	DUP	ENSBTAG00000017570			No_Paralogs	pseudogene	Entire gene
CNVR_11771	27	23713902	26384172	2670271	DUP	ENSBTAG00000033727	RBPMS	RNA binding protein with multiple splicing [Source:HGNC Symbol;Acc:HGNC:19097]	Paralogs	protein_coding	Entire gene
CNVR_11771	27	23713902	26384172	2670271	DUP	ENSBTAG00000039328	PURG	purine rich element binding protein G [Source:HGNC Symbol;Acc:HGNC:17930]	Paralogs	protein_coding	Entire gene
CNVR_11771	27	23713902	26384172	2670271	DUP	ENSBTAG00000042149	U6	U6 spliceosomal RNA [Source:RFAM;Acc:RF00026]	Paralogs	snRNA	Entire gene
CNVR_11771	27	23713902	26384172	2670271	DUP	ENSBTAG00000042502	SNORA1	Small nucleolar RNA SNORA1 [Source:RFAM;Acc:RF00408]	Paralogs	snoRNA	Entire gene
CNVR_11771	27	23713902	26384172	2670271	DUP	ENSBTAG00000044208	DUSP4	dual specificity protein phosphatase 4 [Source:RefSeq peptide;Acc:NP_001193882]	Paralogs	protein_coding	Entire gene
CNVR_11771	27	23713902	26384172	2670271	DUP	ENSBTAG00000044214	bta-mir-2399	bta-mir-2399 [Source:miRBase;Acc:MI0011440]	No_Paralogs	miRNA	Entire gene
CNVR_11771	27	23713902	26384172	2670271	DUP	ENSBTAG00000047140	Metazoa_SRP	Metazoan signal recognition particle RNA [Source:RFAM;Acc:RF00017]	Paralogs	misc_RNA	Entire gene
CNVR_11771	27	23713902	26384172	2670271	DUP	ENSBTAG00000047512			No_Paralogs	pseudogene	Entire gene
CNVR_11858	27	30731140	30732017	878	DEL	ENSBTAG00000010241	UNC5D	unc-5 netrin receptor D [Source:HGNC Symbol;Acc:HGNC:18634]	Paralogs	protein_coding	Intron
CNVR_11870	27	34469838	34472000	2163	DEL	ENSBTAG00000033312			Paralogs	protein_coding	Intron
CNVR_11889	27	37854456	37855706	1251	DEL	ENSBTAG00000004613	CSGALNACT1	chondroitin sulfate N-acetylgalactosaminyltransferase 1 [Source:HGNC Symbol;Acc:HGNC:24290]	Paralogs	protein_coding	Intron
CNVR_11890	27	38054751	38056839	2089	DEL	ENSBTAG00000001186	SH2D4A	SH2 domain containing 4A [Source:HGNC Symbol;Acc:HGNC:26102]	Paralogs	protein_coding	Intron
CNVR_3633	13	10812199	11297453	485255	CNV	ENSBTAG00000000686	NANP	N-acetylneuraminic acid phosphatase [Source:HGNC Symbol;Acc:HGNC:16140]	No_Paralogs	protein_coding	Entire gene
CNVR_11898	27	39609951	43049305	3439355	DEL	ENSBTAG00000004593	TOP2B	topoisomerase	Paralogs	protein_coding	Entire gene
CNVR_11898	27	39609951	43049305	3439355	DEL	ENSBTAG00000006677			No_Paralogs	pseudogene	Entire gene
CNVR_11898	27	39609951	43049305	3439355	DEL	ENSBTAG00000006680	NKIRAS1	NFKB inhibitor interacting Ras like 1 [Source:HGNC Symbol;Acc:HGNC:17899]	Paralogs	protein_coding	Entire gene
CNVR_11898	27	39609951	43049305	3439355	DEL	ENSBTAG00000007031	OXSM	3-oxoacyl-ACP synthase, mitochondrial [Source:HGNC Symbol;Acc:HGNC:26063]	Paralogs	protein_coding	Entire gene
CNVR_11898	27	39609951	43049305	3439355	DEL	ENSBTAG00000011518	RARB	retinoic acid receptor beta [Source:HGNC Symbol;Acc:HGNC:9865]	Paralogs	protein_coding	Entire gene
CNVR_11898	27	39609951	43049305	3439355	DEL	ENSBTAG00000017021			Paralogs	protein_coding	Entire gene
CNVR_11898	27	39609951	43049305	3439355	DEL	ENSBTAG00000017802	THRB	thyroid hormone receptor beta [Source:HGNC Symbol;Acc:HGNC:11799]	Paralogs	protein_coding	Entire gene
CNVR_11898	27	39609951	43049305	3439355	DEL	ENSBTAG00000018024	NR1D2	nuclear receptor subfamily 1 group D member 2 [Source:RefSeq peptide;Acc:NP_001276722]	Paralogs	protein_coding	Entire gene
CNVR_11898	27	39609951	43049305	3439355	DEL	ENSBTAG00000021882			Paralogs	protein_coding	Entire gene
CNVR_11898	27	39609951	43049305	3439355	DEL	ENSBTAG00000033080			Paralogs	protein_coding	Entire gene
CNVR_11898	27	39609951	43049305	3439355	DEL	ENSBTAG00000043723	7SK	7SK RNA [Source:RFAM;Acc:RF00100]	Paralogs	misc_RNA	Entire gene
CNVR_11898	27	39609951	43049305	3439355	DEL	ENSBTAG00000044625	bta-mir-2401	bta-mir-2401 [Source:miRBase;Acc:MI0011443]	No_Paralogs	miRNA	Entire gene
CNVR_11898	27	39609951	43049305	3439355	DEL	ENSBTAG00000045690			Paralogs	protein_coding	Entire gene
CNVR_11898	27	39609951	43049305	3439355	DEL	ENSBTAG00000047115	5S_rRNA	5S ribosomal RNA [Source:RFAM;Acc:RF00001]	Paralogs	rRNA	Entire gene
CNVR_11898	27	39609951	43049305	3439355	DEL	ENSBTAG00000047930	UBE2E2	ubiquitin-conjugating enzyme E2 E2 [Source:RefSeq peptide;Acc:NP_001178119]	Paralogs	protein_coding	Entire gene
CNVR_11905	27	39956648	41056271	1099624	DEL	ENSBTAG00000004593	TOP2B	topoisomerase	Paralogs	protein_coding	Entire gene
CNVR_11905	27	39956648	41056271	1099624	DEL	ENSBTAG00000011518	RARB	retinoic acid receptor beta [Source:HGNC Symbol;Acc:HGNC:9865]	Paralogs	protein_coding	Entire gene
CNVR_11905	27	39956648	41056271	1099624	DEL	ENSBTAG00000017021			Paralogs	protein_coding	Entire gene
CNVR_11905	27	39956648	41056271	1099624	DEL	ENSBTAG00000045690			Paralogs	protein_coding	Entire gene
CNVR_11905	27	39956648	41056271	1099624	DEL	ENSBTAG00000047115	5S_rRNA	5S ribosomal RNA [Source:RFAM;Acc:RF00001]	Paralogs	rRNA	Entire gene
CNVR_11971	28	2275709	4192646	1916938	DEL	ENSBTAG00000025021			Paralogs	protein_coding	Some exons
CNVR_11971	28	2275709	4192646	1916938	DEL	ENSBTAG00000004217			Paralogs	protein_coding	Entire gene
CNVR_11971	28	2275709	4192646	1916938	DEL	ENSBTAG00000004624			Paralogs	protein_coding	Entire gene
CNVR_11898	27	39609951	43049305	3439355	DEL	ENSBTAG00000003793	NGLY1	N-glycanase 1 [Source:HGNC Symbol;Acc:HGNC:17646]	No_Paralogs	protein_coding	Entire gene
CNVR_2062	11	4898400	5538717	640318	DEL	ENSBTAG00000034184	NMS	neuromedin S [Source:HGNC Symbol;Acc:HGNC:32203]	No_Paralogs	protein_coding	Entire gene
CNVR_11971	28	2275709	4192646	1916938	DEL	ENSBTAG00000010367	TTC13	tetratricopeptide repeat domain 13 [Source:HGNC Symbol;Acc:HGNC:26204]	Paralogs	protein_coding	Entire gene
CNVR_11971	28	2275709	4192646	1916938	DEL	ENSBTAG00000010500			Paralogs	protein_coding	Entire gene
CNVR_3635	13	10960139	17846162	6886024	DEL	ENSBTAG00000019509	NUDT5	nudix hydrolase 5 [Source:HGNC Symbol;Acc:HGNC:8052]	No_Paralogs	protein_coding	Entire gene
CNVR_11971	28	2275709	4192646	1916938	DEL	ENSBTAG00000010773	GNPAT	glyceronephosphate O-acyltransferase [Source:HGNC Symbol;Acc:HGNC:4416]	Paralogs	protein_coding	Entire gene
CNVR_11971	28	2275709	4192646	1916938	DEL	ENSBTAG00000011707	OR5AS1	olfactory receptor family 5 subfamily AS member 1 [Source:HGNC Symbol;Acc:HGNC:15261]	Paralogs	protein_coding	Entire gene
CNVR_11971	28	2275709	4192646	1916938	DEL	ENSBTAG00000012132			No_Paralogs	processed_pseudogene	Entire gene
CNVR_11971	28	2275709	4192646	1916938	DEL	ENSBTAG00000019352	OR5D14	olfactory receptor family 5 subfamily D member 14 [Source:HGNC Symbol;Acc:HGNC:15281]	Paralogs	protein_coding	Entire gene
CNVR_12945	3	5779846	7464429	1684584	DEL	ENSBTAG00000007247	NUF2	NUF2, NDC80 kinetochore complex component [Source:HGNC Symbol;Acc:HGNC:14621]	No_Paralogs	protein_coding	Entire gene
CNVR_11971	28	2275709	4192646	1916938	DEL	ENSBTAG00000023073	FAM89A	family with sequence similarity 89 member A [Source:HGNC Symbol;Acc:HGNC:25057]	Paralogs	protein_coding	Entire gene
CNVR_7619	2	5706778	7047584	1340807	DEL	ENSBTAG00000012557	OSGEPL1	O-sialoglycoprotein endopeptidase like 1 [Source:HGNC Symbol;Acc:HGNC:23075]	No_Paralogs	protein_coding	Entire gene
CNVR_11971	28	2275709	4192646	1916938	DEL	ENSBTAG00000026065			Paralogs	protein_coding	Entire gene
CNVR_11971	28	2275709	4192646	1916938	DEL	ENSBTAG00000033555			Paralogs	protein_coding	Entire gene
CNVR_11971	28	2275709	4192646	1916938	DEL	ENSBTAG00000036271			No_Paralogs	pseudogene	Entire gene
CNVR_11971	28	2275709	4192646	1916938	DEL	ENSBTAG00000038166			No_Paralogs	pseudogene	Entire gene
CNVR_11971	28	2275709	4192646	1916938	DEL	ENSBTAG00000038418			Paralogs	protein_coding	Entire gene
CNVR_11971	28	2275709	4192646	1916938	DEL	ENSBTAG00000039837			Paralogs	protein_coding	Entire gene
CNVR_11971	28	2275709	4192646	1916938	DEL	ENSBTAG00000039845			Paralogs	protein_coding	Entire gene
CNVR_11971	28	2275709	4192646	1916938	DEL	ENSBTAG00000045608	EGLN1	egl nine homolog 1 [Source:RefSeq peptide;Acc:NP_001192975]	Paralogs	protein_coding	Entire gene
CNVR_11971	28	2275709	4192646	1916938	DEL	ENSBTAG00000045932			Paralogs	protein_coding	Entire gene
CNVR_11971	28	2275709	4192646	1916938	DEL	ENSBTAG00000046465	7SK	7SK RNA [Source:RFAM;Acc:RF00100]	Paralogs	misc_RNA	Entire gene
CNVR_11971	28	2275709	4192646	1916938	DEL	ENSBTAG00000047434		translin-associated protein X isoform 2 [Source:RefSeq peptide;Acc:NP_001300991]	No_Paralogs	protein_coding	Entire gene
CNVR_11971	28	2275709	4192646	1916938	DEL	ENSBTAG00000047641	SNORD65	Small nucleolar RNA SNORD65 [Source:RFAM;Acc:RF00571]	Paralogs	snoRNA	Entire gene
CNVR_11971	28	2275709	4192646	1916938	DEL	ENSBTAG00000047877	TRIM67	tripartite motif containing 67 [Source:HGNC Symbol;Acc:HGNC:31859]	Paralogs	protein_coding	Entire gene
CNVR_11993	28	4359251	4361087	1837	DEL	ENSBTAG00000025021			Paralogs	protein_coding	Intron
CNVR_11995	28	4446571	4447282	712	DEL	ENSBTAG00000025021			Paralogs	protein_coding	Intron
CNVR_12012	28	7019264	7020034	771	DEL	ENSBTAG00000020361	SLC35F3	solute carrier family 35 member F3 [Source:HGNC Symbol;Acc:HGNC:23616]	Paralogs	protein_coding	Intron
CNVR_12013	28	7026206	7027142	937	DEL	ENSBTAG00000020361	SLC35F3	solute carrier family 35 member F3 [Source:HGNC Symbol;Acc:HGNC:23616]	Paralogs	protein_coding	Intron
CNVR_12017	28	7286001	7288397	2397	DEL	ENSBTAG00000004517	TARBP1	TAR	No_Paralogs	protein_coding	Intron
CNVR_12030	28	9592477	9593583	1107	DEL	ENSBTAG00000012251	MTR	5-methyltetrahydrofolate-homocysteine methyltransferase [Source:HGNC Symbol;Acc:HGNC:7468]	No_Paralogs	protein_coding	Intron
CNVR_12090	28	16059393	16060151	759	DEL	ENSBTAG00000019052	ANK3	ankyrin 3 [Source:HGNC Symbol;Acc:HGNC:494]	Paralogs	protein_coding	Intron
CNVR_12148	28	23855501	23856750	1250	DEL	ENSBTAG00000045699	CTNNA3	catenin alpha 3 [Source:HGNC Symbol;Acc:HGNC:2511]	Paralogs	protein_coding	Intron
CNVR_12150	28	24224501	24231327	6827	DEL	ENSBTAG00000045699	CTNNA3	catenin alpha 3 [Source:HGNC Symbol;Acc:HGNC:2511]	Paralogs	protein_coding	Intron
CNVR_12164	28	27165287	27165729	443	DEL	ENSBTAG00000009984	SGPL1	sphingosine-1-phosphate lyase 1 [Source:HGNC Symbol;Acc:HGNC:10817]	No_Paralogs	protein_coding	Intron
CNVR_12167	28	28811448	28978001	166554	DEL	ENSBTAG00000003876	MCU	mitochondrial calcium uniporter [Source:HGNC Symbol;Acc:HGNC:23526]	Paralogs	protein_coding	Some exons
CNVR_12168	28	29080001	29082030	2030	DEL	ENSBTAG00000009348	OIT3		Paralogs	protein_coding	Some exons
CNVR_12174	28	30007529	30009039	1511	DEL	ENSBTAG00000048036			Paralogs	protein_coding	Entire gene
CNVR_12185	28	32989001	32992609	3609	DEL	ENSBTAG00000013300	KCNMA1	potassium calcium-activated channel subfamily M alpha 1 [Source:HGNC Symbol;Acc:HGNC:6284]	Paralogs	protein_coding	Intron
CNVR_12186	28	32999618	33002500	2883	DEL	ENSBTAG00000013300	KCNMA1	potassium calcium-activated channel subfamily M alpha 1 [Source:HGNC Symbol;Acc:HGNC:6284]	Paralogs	protein_coding	Intron
CNVR_12261	28	44029831	44030866	1036	DEL	ENSBTAG00000032527	ERCC6	DNA excision repair protein ERCC-6 [Source:RefSeq peptide;Acc:NP_001178272]	Paralogs	protein_coding	Intron
CNVR_12267	28	44524286	44526770	2485	DEL	ENSBTAG00000018915		WASH complex subunit FAM21 [Source:RefSeq peptide;Acc:NP_001192696]	No_Paralogs	protein_coding	Intron
CNVR_2196	11	27849112	31324038	3474927	DEL	ENSBTAG00000015719	PIGF	phosphatidylinositol glycan anchor biosynthesis class F [Source:HGNC Symbol;Acc:HGNC:8962]	No_Paralogs	protein_coding	Entire gene
CNVR_3824	13	43742415	46499958	2757544	DEL	ENSBTAG00000002685	PITRM1	pitrilysin metallopeptidase 1 [Source:HGNC Symbol;Acc:HGNC:17663]	No_Paralogs	protein_coding	Entire gene
CNVR_12305	29	2385708	5713726	3328019	DEL	ENSBTAG00000000284	NAALAD2	N-acetylated alpha-linked acidic dipeptidase 2 [Source:HGNC Symbol;Acc:HGNC:14526]	Paralogs	protein_coding	Entire gene
CNVR_12305	29	2385708	5713726	3328019	DEL	ENSBTAG00000009197	TRIM43		Paralogs	protein_coding	Entire gene
CNVR_12305	29	2385708	5713726	3328019	DEL	ENSBTAG00000013615	CHORDC1	cysteine and histidine rich domain containing 1 [Source:HGNC Symbol;Acc:HGNC:14525]	Paralogs	protein_coding	Entire gene
CNVR_12305	29	2385708	5713726	3328019	DEL	ENSBTAG00000016293	TRIM77	tripartite motif containing 77 [Source:HGNC Symbol;Acc:HGNC:34228]	Paralogs	protein_coding	Entire gene
CNVR_12305	29	2385708	5713726	3328019	DEL	ENSBTAG00000033656			Paralogs	protein_coding	Entire gene
CNVR_12305	29	2385708	5713726	3328019	DEL	ENSBTAG00000034891			Paralogs	protein_coding	Entire gene
CNVR_12305	29	2385708	5713726	3328019	DEL	ENSBTAG00000034940			Paralogs	protein_coding	Entire gene
CNVR_12305	29	2385708	5713726	3328019	DEL	ENSBTAG00000034964			No_Paralogs	pseudogene	Entire gene
CNVR_12305	29	2385708	5713726	3328019	DEL	ENSBTAG00000042821	U6	U6 spliceosomal RNA [Source:RFAM;Acc:RF00026]	Paralogs	snRNA	Entire gene
CNVR_12305	29	2385708	5713726	3328019	DEL	ENSBTAG00000042920	U6	U6 spliceosomal RNA [Source:RFAM;Acc:RF00026]	Paralogs	snRNA	Entire gene
CNVR_12305	29	2385708	5713726	3328019	DEL	ENSBTAG00000046202			Paralogs	protein_coding	Entire gene
CNVR_12305	29	2385708	5713726	3328019	DEL	ENSBTAG00000046740			Paralogs	protein_coding	Entire gene
CNVR_12305	29	2385708	5713726	3328019	DEL	ENSBTAG00000046789			Paralogs	protein_coding	Entire gene
CNVR_12305	29	2385708	5713726	3328019	DEL	ENSBTAG00000047929	U6	U6 spliceosomal RNA [Source:RFAM;Acc:RF00026]	Paralogs	snRNA	Entire gene
CNVR_12305	29	2385708	5713726	3328019	DEL	ENSBTAG00000004081	FAT3	FAT atypical cadherin 3 [Source:HGNC Symbol;Acc:HGNC:23112]	Paralogs	protein_coding	5' UTR
CNVR_12306	29	2506353	2529041	22689	DEL	ENSBTAG00000042920	U6	U6 spliceosomal RNA [Source:RFAM;Acc:RF00026]	Paralogs	snRNA	Entire gene
CNVR_12306	29	2506353	2529041	22689	DEL	ENSBTAG00000004081	FAT3	FAT atypical cadherin 3 [Source:HGNC Symbol;Acc:HGNC:23112]	Paralogs	protein_coding	Intron
CNVR_12345	29	5332971	5455944	122974	CNV	ENSBTAG00000033656			Paralogs	protein_coding	Entire gene
CNVR_12351	29	5461160	5750727	289568	DEL	ENSBTAG00000038209			Paralogs	protein_coding	Some exons
CNVR_12351	29	5461160	5750727	289568	DEL	ENSBTAG00000009197	TRIM43		Paralogs	protein_coding	Entire gene
CNVR_12351	29	5461160	5750727	289568	DEL	ENSBTAG00000034891			Paralogs	protein_coding	Entire gene
CNVR_12351	29	5461160	5750727	289568	DEL	ENSBTAG00000034921			Paralogs	protein_coding	Entire gene
CNVR_12351	29	5461160	5750727	289568	DEL	ENSBTAG00000042821	U6	U6 spliceosomal RNA [Source:RFAM;Acc:RF00026]	Paralogs	snRNA	Entire gene
CNVR_12351	29	5461160	5750727	289568	DEL	ENSBTAG00000046202			Paralogs	protein_coding	Entire gene
CNVR_12360	29	5538749	5733335	194587	CNV	ENSBTAG00000009197	TRIM43		Paralogs	protein_coding	Entire gene
CNVR_12360	29	5538749	5733335	194587	CNV	ENSBTAG00000034891			Paralogs	protein_coding	Entire gene
CNVR_12360	29	5538749	5733335	194587	CNV	ENSBTAG00000034921			Paralogs	protein_coding	Entire gene
CNVR_12360	29	5538749	5733335	194587	CNV	ENSBTAG00000042821	U6	U6 spliceosomal RNA [Source:RFAM;Acc:RF00026]	Paralogs	snRNA	Entire gene
CNVR_12375	29	5756082	5757272	1191	DEL	ENSBTAG00000038209			Paralogs	protein_coding	Intron
CNVR_12379	29	5921441	5922441	1001	DEL	ENSBTAG00000007397	FOLH1	folate hydrolase 1 [Source:HGNC Symbol;Acc:HGNC:3788]	Paralogs	protein_coding	Intron
CNVR_12390	29	6383150	6384727	1578	DEL	ENSBTAG00000011813	TYR	tyrosinase [Source:HGNC Symbol;Acc:HGNC:12442]	Paralogs	protein_coding	Intron
CNVR_12398	29	7722663	7725138	2476	DEL	ENSBTAG00000034850		Density-regulated protein [Source:UniProtKB/Swiss-Prot;Acc:Q2HJ47]	Paralogs	protein_coding	Entire gene
CNVR_12406	29	9208001	9211500	3500	DEL	ENSBTAG00000020009	CCDC81	coiled-coil domain containing 81 [Source:HGNC Symbol;Acc:HGNC:26281]	No_Paralogs	protein_coding	Intron
CNVR_12454	29	13580751	13583847	3097	DEL	ENSBTAG00000022427			Paralogs	protein_coding	Entire gene
CNVR_12555	29	22285257	22286152	896	DEL	ENSBTAG00000021654	GAS2	growth arrest specific 2 [Source:HGNC Symbol;Acc:HGNC:4167]	Paralogs	protein_coding	Intron
CNVR_12769	29	38431845	39014499	582655	DEL	ENSBTAG00000007849			Paralogs	protein_coding	Entire gene
CNVR_12769	29	38431845	39014499	582655	DEL	ENSBTAG00000036172			Paralogs	protein_coding	Entire gene
CNVR_12769	29	38431845	39014499	582655	DEL	ENSBTAG00000036277			Paralogs	protein_coding	Entire gene
CNVR_12769	29	38431845	39014499	582655	DEL	ENSBTAG00000039045			Paralogs	protein_coding	Entire gene
CNVR_12769	29	38431845	39014499	582655	DEL	ENSBTAG00000039970		pregnancy-associated glycoprotein 16 precursor [Source:RefSeq peptide;Acc:NP_788798]	Paralogs	protein_coding	Entire gene
CNVR_12769	29	38431845	39014499	582655	DEL	ENSBTAG00000040140			Paralogs	protein_coding	Entire gene
CNVR_12769	29	38431845	39014499	582655	DEL	ENSBTAG00000045670			Paralogs	protein_coding	Entire gene
CNVR_12769	29	38431845	39014499	582655	DEL	ENSBTAG00000046038			Paralogs	protein_coding	Entire gene
CNVR_12769	29	38431845	39014499	582655	DEL	ENSBTAG00000046497			Paralogs	protein_coding	Entire gene
CNVR_12769	29	38431845	39014499	582655	DEL	ENSBTAG00000047141		pregnancy-associated glycoprotein 7 isoform 1 precursor [Source:RefSeq peptide;Acc:NP_001103448]	Paralogs	protein_coding	Entire gene
CNVR_12769	29	38431845	39014499	582655	DEL	ENSBTAG00000047989			Paralogs	protein_coding	Entire gene
CNVR_12769	29	38431845	39014499	582655	DEL	ENSBTAG00000048133			Paralogs	protein_coding	Entire gene
CNVR_12769	29	38431845	39014499	582655	DEL	ENSBTAG00000039036			Paralogs	protein_coding	5' UTR
CNVR_12781	29	38913544	39000290	86747	DEL	ENSBTAG00000039045			Paralogs	protein_coding	Entire gene
CNVR_12781	29	38913544	39000290	86747	DEL	ENSBTAG00000039970		pregnancy-associated glycoprotein 16 precursor [Source:RefSeq peptide;Acc:NP_788798]	Paralogs	protein_coding	Entire gene
CNVR_12781	29	38913544	39000290	86747	DEL	ENSBTAG00000047989			Paralogs	protein_coding	Entire gene
CNVR_12788	29	39225239	39640849	415611	DEL	ENSBTAG00000026016			Paralogs	protein_coding	Entire gene
CNVR_12788	29	39225239	39640849	415611	DEL	ENSBTAG00000034244			Paralogs	protein_coding	Entire gene
CNVR_12788	29	39225239	39640849	415611	DEL	ENSBTAG00000035736			Paralogs	protein_coding	Entire gene
CNVR_12788	29	39225239	39640849	415611	DEL	ENSBTAG00000038918			Paralogs	protein_coding	Entire gene
CNVR_12788	29	39225239	39640849	415611	DEL	ENSBTAG00000046398			Paralogs	protein_coding	Entire gene
CNVR_12788	29	39225239	39640849	415611	DEL	ENSBTAG00000047419			Paralogs	protein_coding	Entire gene
CNVR_12788	29	39225239	39640849	415611	DEL	ENSBTAG00000047892			Paralogs	protein_coding	Entire gene
CNVR_12788	29	39225239	39640849	415611	DEL	ENSBTAG00000048073			Paralogs	protein_coding	Entire gene
CNVR_12788	29	39225239	39640849	415611	DEL	ENSBTAG00000048202			Paralogs	protein_coding	5' UTR
CNVR_12790	29	39279769	39644537	364769	DEL	ENSBTAG00000026016			Paralogs	protein_coding	Entire gene
CNVR_12790	29	39279769	39644537	364769	DEL	ENSBTAG00000034244			Paralogs	protein_coding	Entire gene
CNVR_12790	29	39279769	39644537	364769	DEL	ENSBTAG00000035736			Paralogs	protein_coding	Entire gene
CNVR_12790	29	39279769	39644537	364769	DEL	ENSBTAG00000038918			Paralogs	protein_coding	Entire gene
CNVR_12790	29	39279769	39644537	364769	DEL	ENSBTAG00000047419			Paralogs	protein_coding	Entire gene
CNVR_12790	29	39279769	39644537	364769	DEL	ENSBTAG00000047892			Paralogs	protein_coding	Entire gene
CNVR_12790	29	39279769	39644537	364769	DEL	ENSBTAG00000048073			Paralogs	protein_coding	Entire gene
CNVR_12792	29	39339751	39367250	27500	DEL	ENSBTAG00000034244			Paralogs	protein_coding	Entire gene
CNVR_12792	29	39339751	39367250	27500	DEL	ENSBTAG00000047419			Paralogs	protein_coding	Intron
CNVR_12798	29	39592813	39812107	219295	DEL	ENSBTAG00000026016			Paralogs	protein_coding	Entire gene
CNVR_12798	29	39592813	39812107	219295	DEL	ENSBTAG00000037784			Paralogs	protein_coding	Entire gene
CNVR_12798	29	39592813	39812107	219295	DEL	ENSBTAG00000038506			Paralogs	protein_coding	Entire gene
CNVR_12798	29	39592813	39812107	219295	DEL	ENSBTAG00000038918			Paralogs	protein_coding	Entire gene
CNVR_12798	29	39592813	39812107	219295	DEL	ENSBTAG00000046085			Paralogs	protein_coding	Entire gene
CNVR_12798	29	39592813	39812107	219295	DEL	ENSBTAG00000046686			Paralogs	protein_coding	Entire gene
CNVR_12824	29	42463828	42539893	76066	DEL	ENSBTAG00000011019			Paralogs	protein_coding	Entire gene
CNVR_12837	29	44621101	44623338	2238	DEL	ENSBTAG00000046150			No_Paralogs	protein_coding	Some exons
CNVR_12839	29	44929201	44930553	1353	DEL	ENSBTAG00000009026	PACS1	phosphofurin acidic cluster sorting protein 1 [Source:HGNC Symbol;Acc:HGNC:30032]	Paralogs	protein_coding	Some exons
CNVR_1334	10	7026035	7027330	1296	DEL	ENSBTAG00000007114	POC5	POC5 centriolar protein [Source:HGNC Symbol;Acc:HGNC:26658]	No_Paralogs	protein_coding	Some exons
CNVR_12865	29	50719824	50720599	776	DEL	ENSBTAG00000017805	CRACR2B	calcium release activated channel regulator 2B [Source:HGNC Symbol;Acc:HGNC:28703]	Paralogs	protein_coding	Intron
CNVR_12867	29	50720009	50720587	579	DEL	ENSBTAG00000017805	CRACR2B	calcium release activated channel regulator 2B [Source:HGNC Symbol;Acc:HGNC:28703]	Paralogs	protein_coding	Intron
CNVR_4339	14	23735501	23737628	2128	DEL	ENSBTAG00000022539	POLR2K	Bos taurus polymerase	No_Paralogs	protein_coding	Entire gene
CNVR_12886	3	702501	773700	71200	DUP	ENSBTAG00000045995			No_Paralogs	pseudogene	Entire gene
CNVR_12886	3	702501	773700	71200	DUP	ENSBTAG00000020969	DCAF6	DDB1 and CUL4 associated factor 6 [Source:HGNC Symbol;Acc:HGNC:30002]	Paralogs	protein_coding	5' UTR
CNVR_12945	3	5779846	7464429	1684584	DEL	ENSBTAG00000001608			No_Paralogs	processed_pseudogene	Entire gene
[truncated: 676 more rows]
